# Supplementary material for: Wild-Type U2AF1 Antagonizes the Splicing Program Characteristic of U2AF1-Mutant Tumors and Is Required for Cell Survival
Source: PLoS Genet. 2016 Oct 24;12(10):e1006384. doi: 10.1371/journal.pgen.1006384 (PMC5077151; doi:10.1371/journal.pgen.1006384)
Supplement: S2 Table — Same as S1 Table, but for splicing events that are differentially spliced in the thirteen LUAD samples with the U2AF1S34F mutation versus all WT samples by group comparison. “p-value”, p-value computed with the Mann-Whitney U test for group comparisons. (XLS) [file pgen.1006384.s021.xls]

## Sheet: S2
Event	Coordinates	Gene	Gene Name	Gene Description	Type	NMD Target	deltaPsi	p-value
a3ss@1:101467143:101487197:-|1:101467100:101487197:-.1	chr1:101467000-101487297	ENSG00000117543	DPH5	DPH5 homolog (S. cerevisiae)	a3ss	TRUE	-0.135	0.0054
a3ss@1:150990380:150990943:+|1:150990380:150991033:+.1	chr1:150990280-150991133	ENSG00000143363	PRUNE	prune homolog (Drosophila)	a3ss	NA	-0.185	1e-05
a3ss@1:155278756:155279834:+|1:155278756:155279836:+|1:155278756:155279855:+.1	chr1:155278656-155279955	ENSG00000160752	FDPS	farnesyl diphosphate synthase	a3ss	NA	-0.195	3.4e-07
a3ss@1:155279756:155279834:+|1:155279756:155279855:+.1	chr1:155279656-155279955	ENSG00000160752	FDPS	farnesyl diphosphate synthase	a3ss	NA	-0.195	5.8e-05
a3ss@1:27674503:27675571:+|1:27674503:27675607:+.1	chr1:27674403-27675707	ENSG00000142765	SYTL1	synaptotagmin-like 1	a3ss	NA	-0.135	3.3e-07
a3ss@1:63249944:63269390:+|1:63249944:63269394:+|1:63249944:63269449:+.1	chr1:63249844-63269549	ENSG00000125703	ATG4C	autophagy related 4C, cysteine peptidase	a3ss	NA	-0.17	0.0096
a3ss@1:78187610:78187709:-|1:78187586:78187709:-.1	chr1:78187486-78187809	ENSG00000077254	USP33	ubiquitin specific peptidase 33	a3ss	NA	0.165	0.0011
a3ss@1:79115590:79115871:+|1:79115590:79116226:+.1	chr1:79115490-79116326	ENSG00000137965	IFI44	interferon-induced protein 44	a3ss	NA	-0.12	0.013
a3ss@1:90470803:90472904:+|1:90470803:90473171:+.1	chr1:90470703-90473271	ENSG00000162664	ZNF326	zinc finger protein 326	a3ss	NA	-0.135	0.018
a3ss@1:90470803:90472904:+|1:90470803:90473171:+|1:90470803:90473193:+.1	chr1:90470703-90473293	ENSG00000162664	ZNF326	zinc finger protein 326	a3ss	FALSE	-0.105	0.015
a3ss@10:124922344:124923336:+|10:124922344:124924563:+.1	chr10:124922244-124924663	ENSG00000154473	BUB3	BUB3 mitotic checkpoint protein	a3ss	NA	-0.115	0.00017
a3ss@11:104897083:104897569:-|11:104896327:104897569:-.1	chr11:104896227-104897669	ENSG00000137752	CASP1	caspase 1, apoptosis-related cysteine peptidase	a3ss	NA	0.145	0.0085
a3ss@11:28311944:28318300:+|11:28311944:28318344:+.1	chr11:28311844-28318444	ENSG00000169519	METTL15	methyltransferase like 15	a3ss	NA	-0.13	0.01
a3ss@11:64949484:64950172:+|11:64949484:64950373:+.1	chr11:64949384-64950473	ENSG00000014216	CAPN1	calpain 1, (mu/I) large subunit	a3ss	NA	-0.205	0.0062
a3ss@11:85693046:85694909:-|11:85693031:85694909:-.1	chr11:85692931-85695009	ENSG00000073921	PICALM	phosphatidylinositol binding clathrin assembly protein	a3ss	NA	0.145	1.3e-08
a3ss@11:85701442:85707869:-|11:85701421:85707869:-.1	chr11:85701321-85707969	ENSG00000073921	PICALM	phosphatidylinositol binding clathrin assembly protein	a3ss	NA	-0.105	0.014
a3ss@12:109999134:109999225:-|12:109998909:109999225:-.1	chr12:109998809-109999325	ENSG00000139428	MMAB	methylmalonic aciduria (cobalamin deficiency) cblB type	a3ss	TRUE	0.135	0.0077
a3ss@12:6675502:6675695:-|12:6675490:6675695:-.1	chr12:6675390-6675795	ENSG00000111641	NOP2	NOP2 nucleolar protein	a3ss	NA	-0.14	0.0081
a3ss@13:28019293:28024201:-|13:28019274:28024201:-.1	chr13:28019174-28024301	ENSG00000122033	MTIF3	mitochondrial translational initiation factor 3	a3ss	NA	-0.12	0.00096
a3ss@14:103933528:103934370:+|14:103933528:103934418:+.1	chr14:103933428-103934518	ENSG00000075413	MARK3	MAP/microtubule affinity-regulating kinase 3	a3ss	NA	-0.115	5.7e-05
a3ss@14:24584502:24584591:+|14:24584502:24584752:+.1	chr14:24584402-24584852	ENSG00000100897	DCAF11	DDB1 and CUL4 associated factor 11	a3ss	NA	-0.185	0.018
a3ss@14:94577143:94577971:+|14:94577143:94578005:+.1	chr14:94577043-94578105	ENSG00000165949	IFI27	interferon, alpha-inducible protein 27	a3ss	NA	0.205	1.2e-06
a3ss@14:94577324:94577971:+|14:94577324:94578005:+.1	chr14:94577224-94578105	ENSG00000165949	IFI27	interferon, alpha-inducible protein 27	a3ss	NA	0.2	3.4e-06
a3ss@15:49429655:49431725:-|15:49429634:49431725:-.1	chr15:49429534-49431825	ENSG00000166200	COPS2	COP9 constitutive photomorphogenic homolog subunit 2 (Arabidopsis)	a3ss	NA	-0.105	0.00014
a3ss@15:59192136:59193459:-|15:59192082:59193459:-.1	chr15:59191982-59193559	ENSG00000137776	SLTM	SAFB-like, transcription modulator	a3ss	NA	-0.115	0.0019
a3ss@16:21170067:21172299:+|16:21170067:21172406:+.1	chr16:21169967-21172506	ENSG00000011638	TMEM159	transmembrane protein 159	a3ss	NA	-0.11	0.0015
a3ss@16:75148132:75148424:-|16:75148063:75148424:-.1	chr16:75147963-75148524	ENSG00000166816	LDHD	lactate dehydrogenase D	a3ss	NA	0.115	0.0098
a3ss@17:1616189:1616997:-|17:1615693:1616997:-.1	chr17:1615593-1617097	ENSG00000186594	MIR22HG	NA	a3ss	NA	0.1	0.022
a3ss@17:16252647:16253245:-|17:16251999:16253245:-.1	chr17:16251899-16253345	ENSG00000166582	CENPV	centromere protein V	a3ss	TRUE	-0.205	0.027
a3ss@17:16342728:16342842:+|17:16342728:16342895:+|17:16342728:16342974:+.1	chr17:16342628-16343074	ENSG00000175061	C17orf76-AS1	NA	a3ss	TRUE	-0.11	0.0045
a3ss@17:25633908:25634770:+|17:25633908:25636126:+.1	chr17:25633808-25636226	ENSG00000109046	WSB1	WD repeat and SOCS box containing 1	a3ss	TRUE	-0.12	0.043
a3ss@17:27086894:27093604:-|17:27086782:27093604:-.1	chr17:27086682-27093704	ENSG00000173065	FAM222B	family with sequence similarity 222, member B	a3ss	NA	-0.115	0.00057
a3ss@17:65972074:65978249:+|17:65972074:65978368:+.1	chr17:65971974-65978468	ENSG00000171634	BPTF	bromodomain PHD finger transcription factor	a3ss	NA	0.11	0.00071
a3ss@17:77923664:77924210:-|17:77923622:77924210:-.1	chr17:77923522-77924310	ENSG00000167291	TBC1D16	TBC1 domain family, member 16	a3ss	NA	-0.11	0.0023
a3ss@18:43462452:43464582:-|18:43462396:43464582:-.1	chr18:43462296-43464682	ENSG00000152223	EPG5	ectopic P-granules autophagy protein 5 homolog (C. elegans)	a3ss	FALSE	-0.11	0.0072
a3ss@18:72163666:72167117:+|18:72163666:72167172:+.1	chr18:72163566-72167272	ENSG00000133313	CNDP2	CNDP dipeptidase 2 (metallopeptidase M20 family)	a3ss	NA	-0.105	7.8e-06
a3ss@18:9595151:9614224:-|18:9595100:9614224:-.1	chr18:9595000-9614324	ENSG00000154845	PPP4R1	protein phosphatase 4, regulatory subunit 1	a3ss	NA	-0.105	0.00059
a3ss@19:36203935:36205425:+|19:36203935:36206365:+.1	chr19:36203835-36206465	ENSG00000011590	ZBTB32	zinc finger and BTB domain containing 32	a3ss	NA	-0.14	0.018
a3ss@19:38905763:38907692:-|19:38905556:38907692:-.1	chr19:38905456-38907792	ENSG00000171777	RASGRP4	RAS guanyl releasing protein 4	a3ss	NA	-0.15	0.013
a3ss@19:4324664:4325213:-|19:4324526:4325213:-.1	chr19:4324426-4325313	ENSG00000178078	STAP2	signal transducing adaptor family member 2	a3ss	NA	-0.165	1.8e-06
a3ss@19:50431105:50432583:-|19:50431072:50432583:-.1	chr19:50430972-50432683	ENSG00000104951	IL4I1	interleukin 4 induced 1	a3ss	NA	-0.145	0.0014
a3ss@2:101609989:101611862:+|2:101609989:101612258:+.1	chr2:101609889-101612358	ENSG00000170485	NPAS2	neuronal PAS domain protein 2	a3ss	NA	0.11	0.0049
a3ss@2:202098835:202131184:+|2:202098835:202131210:+.1	chr2:202098735-202131310	ENSG00000064012	CASP8	caspase 8, apoptosis-related cysteine peptidase	a3ss	NA	-0.35	2.8e-07
a3ss@2:24283796:24285889:+|2:24283796:24285934:+.1	chr2:24283696-24286034	ENSG00000205639	MFSD2B	major facilitator superfamily domain containing 2B	a3ss	NA	0.18	0.0007
a3ss@2:24985645:24991090:+|2:24985645:24991093:+.1	chr2:24985545-24991193	ENSG00000084676	NCOA1	nuclear receptor coactivator 1	a3ss	NA	-0.125	0.0045
a3ss@20:2442585:2443282:-|20:2442439:2443282:-.1	chr20:2442339-2443382	ENSG00000125835	SNRPB	small nuclear ribonucleoprotein polypeptides B and B1	a3ss	NA	-0.135	0.0078
a3ss@20:47892424:47894558:-|20:47892416:47894558:-.1	chr20:47892316-47894658	ENSG00000124201	ZNFX1	zinc finger, NFX1-type containing 1	a3ss	NA	-0.12	0.0081
a3ss@22:20397288:20397878:-|22:20397240:20397878:-.1	chr22:20397140-20397978	ENSG00000215513	PI4KAP1	NA	a3ss	NA	-0.23	0.03
a3ss@22:20922918:20936898:+|22:20922918:20936949:+.1	chr22:20922818-20937049	ENSG00000099917	MED15	mediator complex subunit 15	a3ss	NA	-0.12	0.0007
a3ss@22:38511856:38512082:-|22:38511688:38512082:-.1	chr22:38511588-38512182	ENSG00000184381	PLA2G6	phospholipase A2, group VI (cytosolic, calcium-independent)	a3ss	TRUE	0.105	0.00038
a3ss@3:129547351:129551617:-|3:129546920:129551617:-.1	chr3:129546820-129551717	ENSG00000172765	TMCC1	transmembrane and coiled-coil domain family 1	a3ss	NA	-0.13	0.041
a3ss@3:133371473:133372189:-|3:133371458:133372189:-|3:133371391:133372189:-.1	chr3:133371291-133372289	ENSG00000163781	TOPBP1	topoisomerase (DNA) II binding protein 1	a3ss	FALSE	-0.14	0.0041
a3ss@3:186505671:186506099:+|3:186505671:186506102:+.1	chr3:186505571-186506202	ENSG00000156976	EIF4A2	eukaryotic translation initiation factor 4A2	a3ss	NA	0.145	0.00075
a3ss@3:41280845:41281151:+|3:41280845:41281310:+.1	chr3:41280745-41281410	ENSG00000168036	CTNNB1	catenin (cadherin-associated protein), beta 1, 88kDa	a3ss	NA	0.18	1.8e-08
a3ss@3:49046457:49048854:+|3:49046457:49049068:+.1	chr3:49046357-49049168	ENSG00000178252	WDR6	WD repeat domain 6	a3ss	NA	0.125	6.7e-06
a3ss@3:75475772:75479983:-|3:75475750:75479983:-.1	chr3:75475650-75480083	ENSG00000244026	FAM86DP	NA	a3ss	NA	0.2	0.0024
a3ss@4:420908:429559:-|4:420762:429559:-.1	chr4:420662-429659	ENSG00000182903	ZNF721	zinc finger protein 721	a3ss	NA	-0.14	0.00059
a3ss@5:31536000:31538367:+|5:31536000:31538588:+.1	chr5:31535900-31538688	ENSG00000082213	C5orf22	chromosome 5 open reading frame 22	a3ss	FALSE	-0.115	0.019
a3ss@5:34945130:34945827:+|5:34945130:34945866:+.1	chr5:34945030-34945966	ENSG00000168724	DNAJC21	DnaJ (Hsp40) homolog, subfamily C, member 21	a3ss	NA	0.1	2.3e-05
a3ss@5:78937019:78938655:+|5:78937019:78938667:+.1	chr5:78936919-78938767	ENSG00000164329	PAPD4	PAP associated domain containing 4	a3ss	NA	-0.125	0.0016
a3ss@6:116988370:116989729:-|6:116988075:116989729:-.1	chr6:116987975-116989829	ENSG00000153975	ZUFSP	zinc finger with UFM1-specific peptidase domain	a3ss	NA	-0.1	0.0091
a3ss@6:25605121:25606289:+|6:25605121:25606307:+.1	chr6:25605021-25606407	ENSG00000079691	LRRC16A	leucine rich repeat containing 16A	a3ss	NA	-0.1	0.022
a3ss@6:31763027:31763323:-|6:31762963:31763323:-.1	chr6:31762863-31763423	ENSG00000204394	VARS	valyl-tRNA synthetase	a3ss	NA	-0.105	0.0077
a3ss@6:33048311:33048449:+|6:33048311:33048466:+.1	chr6:33048211-33048566	ENSG00000223865	HLA-DPB1	major histocompatibility complex, class II, DP beta 1	a3ss	TRUE	-0.125	0.014
a3ss@6:41748564:41749088:+|6:41748564:41749162:+|6:41748564:41749222:+.1	chr6:41748464-41749322	ENSG00000124593	PRICKLE4	prickle homolog 4 (Drosophila)	a3ss	NA	-0.165	0.0005
a3ss@7:100075930:100076417:-|7:100075827:100076417:-|7:100075085:100076417:-.1	chr7:100074985-100076517	ENSG00000166925	TSC22D4	TSC22 domain family, member 4	a3ss	NA	-0.16	0.0017
a3ss@7:128379486:128388627:+|7:128379486:128388815:+|7:128379486:128388853:+.1	chr7:128379386-128388953	ENSG00000128595	CALU	calumenin	a3ss	NA	-0.14	0.033
a3ss@7:44259201:44259659:-|7:44259121:44259659:-|7:44257334:44259659:-.1	chr7:44257234-44259759	ENSG00000058404	CAMK2B	calcium/calmodulin-dependent protein kinase II beta	a3ss	NA	0.11	0.037
a3ss@7:44796138:44796546:+|7:44796138:44796574:+|7:44796138:44796642:+.1	chr7:44796038-44796742	ENSG00000122515	ZMIZ2	zinc finger, MIZ-type containing 2	a3ss	FALSE	-0.18	8.9e-06
a3ss@7:5781446:5792477:-|7:5781275:5792477:-.1	chr7:5781175-5792577	ENSG00000011275	RNF216	ring finger protein 216	a3ss	NA	-0.115	0.00014
a3ss@7:72300362:72301272:+|7:72300362:72301336:+.1	chr7:72300262-72301436	ENSG00000225648	SBDSP1	NA	a3ss	NA	0.12	0.0034
a3ss@7:95041091:95041624:-|7:95041055:95041624:-.1	chr7:95040955-95041724	ENSG00000105854	PON2	paraoxonase 2	a3ss	NA	-0.105	7.9e-07
a3ss@8:126104200:126114256:+|8:126104200:126114293:+.1	chr8:126104100-126114393	ENSG00000156831	NSMCE2	non-SMC element 2, MMS21 homolog (S. cerevisiae)	a3ss	NA	-0.1	0.00012
a3ss@8:57127226:57128948:+|8:57127226:57128992:+.1	chr8:57127126-57129092	ENSG00000170791	CHCHD7	coiled-coil-helix-coiled-coil-helix domain containing 7	a3ss	NA	-0.12	4.1e-06
a3ss@9:111693481:111696144:-|9:111693336:111696144:-.1	chr9:111693236-111696244	ENSG00000070061	IKBKAP	inhibitor of kappa light polypeptide gene enhancer in B-cells, kinase complex-associated protein	a3ss	NA	-0.21	0.0022
a3ss@9:111693481:111696144:-|9:111693479:111696144:-|9:111693336:111696144:-.1	chr9:111693236-111696244	ENSG00000070061	IKBKAP	inhibitor of kappa light polypeptide gene enhancer in B-cells, kinase complex-associated protein	a3ss	NA	-0.235	0.00047
a3ss@9:124533003:124534886:+|9:124533003:124534952:+.1	chr9:124532903-124535052	ENSG00000136848	DAB2IP	DAB2 interacting protein	a3ss	NA	-0.12	0.0012
a3ss@9:131038681:131038866:+|9:131038681:131038986:+.1	chr9:131038581-131039086	ENSG00000175854	SWI5	SWI5 recombination repair homolog (yeast)	a3ss	NA	0.115	3.7e-05
a3ss@9:134016097:134019667:+|9:134016097:134019955:+.1	chr9:134015997-134020055	ENSG00000126883	NUP214	nucleoporin 214kDa	a3ss	NA	-0.145	0.011
a3ss@9:91934712:91940342:+|9:91934712:91940346:+|9:91934712:91940463:+.1	chr9:91934612-91940563	ENSG00000187742	SECISBP2	SECIS binding protein 2	a3ss	FALSE	-0.13	0.012
a3ss@X:128581278:128582279:-|X:128581210:128582279:-.1	chrX:128581110-128582379	ENSG00000102038	SMARCA1	SWI/SNF related, matrix associated, actin dependent regulator of chromatin, subfamily a, member 1	a3ss	NA	-0.1	0.00026
a3ss@X:147022181:147026389:+|X:147022181:147026464:+.1	chrX:147022081-147026564	ENSG00000102081	FMR1	fragile X mental retardation 1	a3ss	TRUE	-0.14	0.0097
a3ss@X:147024846:147026389:+|X:147024846:147026425:+|X:147024846:147026464:+.1	chrX:147024746-147026564	ENSG00000102081	FMR1	fragile X mental retardation 1	a3ss	NA	-0.2	2.9e-06
a3ss@X:147024846:147026389:+|X:147024846:147026464:+.1	chrX:147024746-147026564	ENSG00000102081	FMR1	fragile X mental retardation 1	a3ss	NA	-0.135	8.7e-06
a3ss@X:23851729:23858430:-|X:23851627:23858430:-.1	chrX:23851527-23858530	ENSG00000184831	APOO	apolipoprotein O	a3ss	NA	-0.19	3.7e-06
a3ss@X:49021699:49022413:+|X:49021699:49022428:+.1	chrX:49021599-49022528	ENSG00000017621	MAGIX	MAGI family member, X-linked	a3ss	NA	-0.16	2.2e-05
a5ss@1:1274033:1274667:-|1:1274033:1274742:-.1	chr1:1273933-1274842	ENSG00000107404	DVL1	dishevelled, dsh homolog 1 (Drosophila)	a5ss	NA	-0.175	0.00048
a5ss@1:180166025:180166468:+|1:180165738:180166468:+|1:180165734:180166468:+.1	chr1:180165634-180166568	ENSG00000116260	QSOX1	quiescin Q6 sulfhydryl oxidase 1	a5ss	NA	-0.11	0.0011
a5ss@1:193038764:193044950:+|1:193038311:193044950:+.1	chr1:193038211-193045050	ENSG00000116747	TROVE2	TROVE domain family, member 2	a5ss	NA	-0.12	0.0059
a5ss@1:25570124:25570668:-|1:25570124:25571641:-.1	chr1:25570024-25571741	ENSG00000117616	C1orf63	chromosome 1 open reading frame 63	a5ss	TRUE	-0.165	0.037
a5ss@1:31501711:31532051:-|1:31501711:31532146:-.1	chr1:31501611-31532246	ENSG00000134644	PUM1	pumilio homolog 1 (Drosophila)	a5ss	FALSE	-0.115	0.039
a5ss@1:46714080:46714184:+|1:46713418:46714184:+.1	chr1:46713318-46714284	ENSG00000085999	RAD54L	RAD54-like (S. cerevisiae)	a5ss	NA	-0.125	0.021
a5ss@10:73973089:73975540:-|10:73973089:73975594:-.1	chr10:73972989-73975694	ENSG00000138303	ASCC1	activating signal cointegrator 1 complex subunit 1	a5ss	NA	-0.165	0.011
a5ss@11:118926879:118927731:-|11:118926879:118927738:-|11:118926879:118927786:-.1	chr11:118926779-118927886	ENSG00000149428	HYOU1	hypoxia up-regulated 1	a5ss	NA	-0.11	0.0038
a5ss@12:54677018:54677596:+|12:54677015:54677596:+.1	chr12:54676915-54677696	ENSG00000135486	HNRNPA1	heterogeneous nuclear ribonucleoprotein A1	a5ss	NA	-0.13	0.00011
a5ss@15:41146127:41146258:+|15:41146079:41146258:+.1	chr15:41145979-41146358	ENSG00000166145	SPINT1	serine peptidase inhibitor, Kunitz type 1	a5ss	NA	-0.105	7.9e-06
a5ss@15:41146127:41146595:+|15:41146079:41146595:+.1	chr15:41145979-41146695	ENSG00000166145	SPINT1	serine peptidase inhibitor, Kunitz type 1	a5ss	NA	-0.11	0.00012
a5ss@15:65897570:65899497:-|15:65897570:65899640:-.1	chr15:65897470-65899740	ENSG00000138614	VWA9	von Willebrand factor A domain containing 9	a5ss	TRUE	-0.1	0.0057
a5ss@17:21102153:21114249:-|17:21102153:21114380:-.1	chr17:21102053-21114480	ENSG00000178307	TMEM11	transmembrane protein 11	a5ss	NA	-0.12	0.00029
a5ss@17:7490156:7490479:+|17:7490095:7490479:+.1	chr17:7489995-7490579	ENSG00000129255	MPDU1	mannose-P-dolichol utilization defect 1	a5ss	NA	0.205	0.0023
a5ss@19:8530399:8531119:+|19:8530246:8531119:+.1	chr19:8530146-8531219	ENSG00000099783	HNRNPM	heterogeneous nuclear ribonucleoprotein M	a5ss	NA	-0.1	0.0026
a5ss@2:122216551:122217556:-|2:122216551:122217585:-.1	chr2:122216451-122217685	ENSG00000074054	CLASP1	cytoplasmic linker associated protein 1	a5ss	FALSE	-0.115	0.017
a5ss@2:161052126:161052727:-|2:161052126:161052900:-.1	chr2:161052026-161053000	ENSG00000115221	ITGB6	integrin, beta 6	a5ss	FALSE	-0.16	0.011
a5ss@2:58274003:58275962:+|2:58273956:58275962:+|2:58273868:58275962:+.1	chr2:58273768-58276062	ENSG00000028116	VRK2	vaccinia related kinase 2	a5ss	NA	-0.115	0.00093
a5ss@3:134086645:134089542:-|3:134086645:134090032:-|3:134086645:134090155:-.1	chr3:134086545-134090255	ENSG00000114019	AMOTL2	angiomotin like 2	a5ss	FALSE	-0.115	0.047
a5ss@5:154173560:154173660:+|5:154173482:154173660:+.1	chr5:154173382-154173760	ENSG00000155506	LARP1	La ribonucleoprotein domain family, member 1	a5ss	NA	-0.15	0.0035
a5ss@6:159084410:159086427:+|6:159083844:159086427:+.1	chr6:159083744-159086527	ENSG00000164674	SYTL3	synaptotagmin-like 3	a5ss	NA	-0.13	0.0097
a5ss@7:22985782:22986571:-|7:22985782:22986652:-.1	chr7:22985682-22986752	ENSG00000122591	FAM126A	family with sequence similarity 126, member A	a5ss	NA	-0.115	0.016
a5ss@7:99809617:99810576:-|7:99809617:99810646:-|7:99809617:99810670:-.1	chr7:99809517-99810770	ENSG00000239521	GATS	NA	a5ss	NA	0.145	0.0017
a5ss@8:86129731:86131465:-|8:86129731:86131552:-.1	chr8:86129631-86131652	ENSG00000176731	C8orf59	chromosome 8 open reading frame 59	a5ss	NA	0.65	0.018
a5ss@9:101494835:101498284:-|9:101494835:101498778:-|9:101494835:101498809:-.1	chr9:101494735-101498909	ENSG00000165138	ANKS6	ankyrin repeat and sterile alpha motif domain containing 6	a5ss	TRUE	0.1	0.0013
a5ss@9:104130604:104133221:-|9:104130604:104133600:-.1	chr9:104130504-104133700	ENSG00000136881	BAAT	bile acid CoA: amino acid N-acyltransferase (glycine N-choloyltransferase)	a5ss	FALSE	-0.16	0.0065
a5ss@X:49127336:49137869:+|X:49126396:49137869:+.1	chrX:49126296-49137969	ENSG00000049769	PPP1R3F	protein phosphatase 1, regulatory subunit 3F	a5ss	FALSE	-0.135	0.0053
ci@1:155884111:155885664:-|1:155885663:155885664:-.1	chr1:155884011-155885764	ENSG00000132680	KIAA0907	KIAA0907	ci	NA	0.115	0.019
ci@1:156699007:156701783:+|1:156699007:156699008:+.1	chr1:156698907-156701883	ENSG00000143303	RRNAD1	ribosomal RNA adenine dimethylase domain containing 1	ci	NA	-0.12	0.016
ci@1:3547681:3548030:-|1:3548029:3548030:-.1	chr1:3547581-3548130	ENSG00000116213	WRAP73	WD repeat containing, antisense to TP73	ci	NA	-0.135	0.00048
ci@11:9302588:9304918:-|11:9304917:9304918:-.1	chr11:9302488-9305018	ENSG00000166471	TMEM41B	transmembrane protein 41B	ci	NA	-0.115	0.0012
ci@12:120105850:120106041:+|12:120105850:120105851:+.1	chr12:120105750-120106141	ENSG00000111725	PRKAB1	protein kinase, AMP-activated, beta 1 non-catalytic subunit	ci	NA	0.1	0.0032
ci@12:40657703:40668385:+|12:40657703:40657704:+.1	chr12:40657603-40668485	ENSG00000188906	LRRK2	leucine-rich repeat kinase 2	ci	NA	-0.16	0.007
ci@13:113978892:113979976:-|13:113979975:113979976:-.1	chr13:113978792-113980076	ENSG00000139835	GRTP1	growth hormone regulated TBC protein 1	ci	NA	-0.19	0.015
ci@14:65216414:65216699:-|14:65216698:65216699:-.1	chr14:65216314-65216799	ENSG00000070182	SPTB	spectrin, beta, erythrocytic	ci	NA	0.365	0.0034
ci@16:20747680:20748182:-|16:20748181:20748182:-.1	chr16:20747580-20748282	ENSG00000066654	THUMPD1	THUMP domain containing 1	ci	NA	-0.115	0.0025
ci@16:28606785:28606871:-|16:28606870:28606871:-.1	chr16:28606685-28606971	ENSG00000197165	SULT1A2	sulfotransferase family, cytosolic, 1A, phenol-preferring, member 2	ci	NA	0.145	0.0023
ci@16:54953121:54954210:-|16:54954209:54954210:-.1	chr16:54953021-54954310	ENSG00000245694	CRNDE	NA	ci	NA	-0.105	0.0075
ci@17:60072726:60087911:-|17:60087910:60087911:-.1	chr17:60072626-60088011	ENSG00000108510	MED13	mediator complex subunit 13	ci	NA	-0.125	0.018
ci@17:73615298:73615438:+|17:73615298:73615299:+.1	chr17:73615198-73615538	ENSG00000188126	MYO15B	myosin XVB pseudogene	ci	NA	-0.145	0.0014
ci@19:39226069:39226142:-|19:39226141:39226142:-.1	chr19:39225969-39226242	ENSG00000182472	CAPN12	calpain 12	ci	NA	0.2	0.0005
ci@19:55594887:55594984:+|19:55594887:55594888:+.1	chr19:55594787-55595084	ENSG00000131037	EPS8L1	EPS8-like 1	ci	NA	0.105	0.0062
ci@19:6466620:6466962:+|19:6466620:6466621:+.1	chr19:6466520-6467062	ENSG00000130545	CRB3	crumbs homolog 3 (Drosophila)	ci	NA	0.125	0.009
ci@19:8530246:8530364:+|19:8530246:8530247:+.1	chr19:8530146-8530464	ENSG00000099783	HNRNPM	heterogeneous nuclear ribonucleoprotein M	ci	NA	0.11	0.00052
ci@2:228155602:228157907:+|2:228155602:228155603:+.1	chr2:228155502-228158007	ENSG00000169031	COL4A3	collagen, type IV, alpha 3 (Goodpasture antigen)	ci	NA	0.17	0.029
ci@21:18937929:18965470:+|21:18937929:18937930:+.1	chr21:18937829-18965570	ENSG00000154639	CXADR	coxsackie virus and adenovirus receptor	ci	NA	-0.175	0.009
ci@21:38139586:38269160:-|21:38269159:38269160:-.1	chr21:38139486-38269260	ENSG00000159267	HLCS	holocarboxylase synthetase (biotin-(proprionyl-CoA-carboxylase (ATP-hydrolysing)) ligase)	ci	NA	-0.115	0.006
ci@22:46759084:46759893:-|22:46759892:46759893:-.1	chr22:46758984-46759993	ENSG00000075275	CELSR1	cadherin, EGF LAG seven-pass G-type receptor 1 (flamingo homolog, Drosophila)	ci	NA	-0.125	0.0089
ci@22:50752701:50752829:-|22:50752828:50752829:-.1	chr22:50752601-50752929	ENSG00000205593	DENND6B	DENN/MADD domain containing 6B	ci	NA	-0.105	0.0069
ci@3:148871435:148872894:+|3:148871435:148871436:+.1	chr3:148871335-148872994	ENSG00000163755	HPS3	Hermansky-Pudlak syndrome 3	ci	NA	-0.1	0.0097
ci@3:155286113:155301261:-|3:155301260:155301261:-.1	chr3:155286013-155301361	ENSG00000114805	PLCH1	phospholipase C, eta 1	ci	NA	-0.25	0.00032
ci@3:15683564:15685823:+|3:15683564:15683565:+.1	chr3:15683464-15685923	ENSG00000169814	BTD	biotinidase	ci	NA	-0.135	0.011
ci@3:45052885:45053675:+|3:45052885:45052886:+.1	chr3:45052785-45053775	ENSG00000075914	EXOSC7	exosome component 7	ci	NA	-0.135	0.0081
ci@3:50098980:50099395:+|3:50098980:50098981:+.1	chr3:50098880-50099495	ENSG00000004534	RBM6	RNA binding motif protein 6	ci	NA	0.17	0.042
ci@4:15688771:15690174:+|4:15688771:15688772:+.1	chr4:15688671-15690274	ENSG00000237765	FAM200B	family with sequence similarity 200, member B	ci	NA	-0.18	0.0059
ci@4:521019:524225:+|4:521019:521020:+.1	chr4:520919-524325	ENSG00000174227	PIGG	phosphatidylinositol glycan anchor biosynthesis, class G	ci	NA	-0.15	0.0039
ci@4:76504388:76507020:-|4:76507019:76507020:-.1	chr4:76504288-76507120	ENSG00000138769	CDKL2	cyclin-dependent kinase-like 2 (CDC2-related kinase)	ci	NA	-0.285	0.00035
ci@6:42025251:42034050:+|6:42025251:42025252:+.1	chr6:42025151-42034150	ENSG00000137413	TAF8	TAF8 RNA polymerase II, TATA box binding protein (TBP)-associated factor, 43kDa	ci	NA	-0.225	0.038
ci@7:40037263:40038960:+|7:40037263:40037264:+.1	chr7:40037163-40039060	ENSG00000065883	CDK13	cyclin-dependent kinase 13	ci	NA	-0.15	0.044
ci@7:77569619:77569845:+|7:77569619:77569620:+.1	chr7:77569519-77569945	ENSG00000006576	PHTF2	putative homeodomain transcription factor 2	ci	NA	-0.195	0.032
ci@9:15460311:15461629:+|9:15460311:15460312:+.1	chr9:15460211-15461729	ENSG00000164975	SNAPC3	small nuclear RNA activating complex, polypeptide 3, 50kDa	ci	NA	-0.205	9.8e-05
ci@9:66553803:66554528:+|9:66553803:66553804:+.1	chr9:66553703-66554628	ENSG00000170161	RP11-262H14.4	NA	ci	NA	-0.185	0.043
cj@1:1424654:1425637:+|1:1424654:other:+|1:other:1425637:+.1	chr1:1424554-1425737	ENSG00000160072	ATAD3B	ATPase family, AAA domain containing 3B	cj	NA	0.135	0.0014
cj@1:156675338:156675501:-|1:other:156675501:-|1:156675338:other:-.1	chr1:156675238-156675601	ENSG00000143320	CRABP2	cellular retinoic acid binding protein 2	cj	NA	-0.15	0.029
cj@1:161719935:161721458:+|1:161719935:other:+|1:other:161721458:+.1	chr1:161719835-161721558	ENSG00000081721	DUSP12	dual specificity phosphatase 12	cj	NA	-0.1	0.0053
cj@1:204168386:204170761:-|1:other:204170761:-|1:204168386:other:-.1	chr1:204168286-204170861	ENSG00000174567	GOLT1A	golgi transport 1A	cj	NA	-0.11	0.00037
cj@1:79125168:79126239:+|1:79125168:other:+|1:other:79126239:+.1	chr1:79125068-79126339	ENSG00000137965	IFI44	interferon-induced protein 44	cj	NA	-0.175	0.0024
cj@1:93791452:93792159:-|1:other:93792159:-|1:93791452:other:-.1	chr1:93791352-93792259	ENSG00000223745	RP4-717I23.3	NA	cj	NA	-0.18	0.0016
cj@11:10781868:10783494:+|11:10781868:other:+|11:other:10783494:+.1	chr11:10781768-10783594	ENSG00000198730	CTR9	Ctr9, Paf1/RNA polymerase II complex component, homolog (S. cerevisiae)	cj	NA	-0.105	1.7e-05
cj@11:31482261:31484719:-|11:other:31484719:-|11:31482261:other:-.1	chr11:31482161-31484819	ENSG00000148950	IMMP1L	IMP1 inner mitochondrial membrane peptidase-like (S. cerevisiae)	cj	NA	0.115	0.0009
cj@12:111890644:111891481:-|12:other:111891481:-|12:111890644:other:-.1	chr12:111890544-111891581	ENSG00000204842	ATXN2	ataxin 2	cj	NA	0.1	0.0018
cj@12:21011505:21013951:+|12:21011505:other:+|12:other:21013951:+.1	chr12:21011405-21014051	ENSG00000111700	SLCO1B3	solute carrier organic anion transporter family, member 1B3	cj	NA	-0.41	0.049
cj@12:49416658:49418361:-|12:other:49418361:-|12:49416658:other:-.1	chr12:49416558-49418461	ENSG00000167548	MLL2	myeloid/lymphoid or mixed-lineage leukemia 2	cj	NA	-0.12	0.00013
cj@13:103418930:103419623:-|13:other:103419623:-|13:103418930:other:-.1	chr13:103418830-103419723	ENSG00000151287	TEX30	testis expressed 30	cj	NA	-0.105	0.00088
cj@13:103419828:103420610:-|13:other:103420610:-|13:103419828:other:-.1	chr13:103419728-103420710	ENSG00000151287	TEX30	testis expressed 30	cj	NA	-0.18	0.00088
cj@14:104145882:104151323:+|14:104145882:other:+|14:other:104151323:+.1	chr14:104145782-104151423	ENSG00000256500	KLC1	Kinesin light chain 1	cj	NA	0.12	0.0021
cj@14:61346553:61434947:+|14:61346553:other:+|14:other:61434947:+.1	chr14:61346453-61435047	ENSG00000020426	MNAT1	menage a trois homolog 1, cyclin H assembly factor (Xenopus laevis)	cj	NA	-0.12	4.2e-05
cj@14:74343871:74346758:+|14:74343871:other:+|14:other:74346758:+.1	chr14:74343771-74346858	ENSG00000258653	RP5-1021I20.4	Uncharacterized protein	cj	NA	0.155	2.9e-05
cj@14:76105805:76107298:+|14:76105805:other:+|14:other:76107298:+.1	chr14:76105705-76107398	ENSG00000119686	FLVCR2	feline leukemia virus subgroup C cellular receptor family, member 2	cj	NA	-0.115	0.045
cj@15:43438832:43440953:+|15:43438832:other:+|15:other:43440953:+.1	chr15:43438732-43441053	ENSG00000137842	TMEM62	transmembrane protein 62	cj	NA	-0.14	0.00063
cj@15:48444139:48444431:-|15:other:48444431:-|15:48444139:other:-.1	chr15:48444039-48444531	ENSG00000104177	MYEF2	myelin expression factor 2	cj	NA	-0.23	0.0041
cj@15:48444481:48445989:-|15:other:48445989:-|15:48444481:other:-.1	chr15:48444381-48446089	ENSG00000104177	MYEF2	myelin expression factor 2	cj	NA	-0.3	0.00024
cj@15:51017520:51018518:-|15:other:51018518:-|15:51017520:other:-.1	chr15:51017420-51018618	ENSG00000138600	SPPL2A	signal peptide peptidase like 2A	cj	NA	0.175	0.0003
cj@15:59956319:59961091:-|15:other:59961091:-|15:59956319:other:-.1	chr15:59956219-59961191	ENSG00000140299	BNIP2	BCL2/adenovirus E1B 19kDa interacting protein 2	cj	NA	-0.16	0.002
cj@15:66787757:66789980:-|15:other:66789980:-|15:66787757:other:-.1	chr15:66787657-66790080	ENSG00000174446	SNAPC5	small nuclear RNA activating complex, polypeptide 5, 19kDa	cj	NA	-0.11	0.0046
cj@15:75197053:75197495:-|15:other:75197495:-|15:75197053:other:-.1	chr15:75196953-75197595	ENSG00000178761	FAM219B	family with sequence similarity 219, member B	cj	NA	-0.11	0.021
cj@16:15044112:15045472:+|16:15044112:other:+|16:other:15045472:+.1	chr16:15044012-15045572	ENSG00000183426	NPIP	nuclear pore complex interacting protein	cj	NA	0.27	0.00052
cj@16:15198615:15199406:-|16:other:15199406:-|16:15198615:other:-.1	chr16:15198515-15199506	ENSG00000188599	NPIPP1	nuclear pore complex interacting protein pseudogene 1	cj	NA	-0.16	0.021
cj@16:19236160:19278202:+|16:19236160:other:+|16:other:19278202:+.1	chr16:19236060-19278302	ENSG00000103528	SYT17	synaptotagmin XVII	cj	NA	0.235	0.013
cj@16:5145515:5147645:-|16:other:5147645:-|16:5145515:other:-.1	chr16:5145415-5147745	ENSG00000118894	FAM86A	family with sequence similarity 86, member A	cj	NA	-0.115	0.05
cj@17:26902562:26903819:-|17:other:26903819:-|17:26902562:other:-.1	chr17:26902462-26903919	ENSG00000109107	ALDOC	aldolase C, fructose-bisphosphate	cj	NA	0.27	4.9e-06
cj@17:42152138:42152337:+|17:42152138:other:+|17:other:42152337:+.1	chr17:42152038-42152437	ENSG00000141349	G6PC3	glucose 6 phosphatase, catalytic, 3	cj	NA	-0.165	0.0041
cj@17:42152455:42152678:+|17:42152455:other:+|17:other:42152678:+.1	chr17:42152355-42152778	ENSG00000141349	G6PC3	glucose 6 phosphatase, catalytic, 3	cj	NA	-0.105	0.007
cj@17:7490335:7490479:+|17:7490335:other:+|17:other:7490479:+.1	chr17:7490235-7490579	ENSG00000129255	MPDU1	mannose-P-dolichol utilization defect 1	cj	NA	-0.195	3.1e-05
cj@17:7530111:7530261:-|17:other:7530261:-|17:7530111:other:-.1	chr17:7530011-7530361	ENSG00000141504	SAT2	spermidine/spermine N1-acetyltransferase family member 2	cj	NA	-0.165	0.041
cj@17:80772810:80828100:+|17:80772810:other:+|17:other:80828100:+.1	chr17:80772710-80828200	ENSG00000141556	TBCD	tubulin folding cofactor D	cj	NA	-0.24	0.0011
cj@19:17339118:17339612:+|19:17339118:other:+|19:other:17339612:+.1	chr19:17339018-17339712	ENSG00000099330	OCEL1	occludin/ELL domain containing 1	cj	NA	-0.1	0.0015
cj@19:34710478:34710611:+|19:34710478:other:+|19:other:34710611:+.1	chr19:34710378-34710711	ENSG00000257103	LSM14A	LSM14A, SCD6 homolog A (S. cerevisiae)	cj	NA	-0.105	5.7e-05
cj@19:45668228:45668385:-|19:other:45668385:-|19:45668228:other:-.1	chr19:45668128-45668485	ENSG00000007255	TRAPPC6A	trafficking protein particle complex 6A	cj	NA	-0.1	0.0033
cj@19:5218543:5218798:-|19:other:5218798:-|19:5218543:other:-.1	chr19:5218443-5218898	ENSG00000105426	PTPRS	protein tyrosine phosphatase, receptor type, S	cj	NA	-0.12	0.00087
cj@19:5218809:5219321:-|19:other:5219321:-|19:5218809:other:-.1	chr19:5218709-5219421	ENSG00000105426	PTPRS	protein tyrosine phosphatase, receptor type, S	cj	NA	-0.19	2.2e-05
cj@2:101609989:101611862:+|2:101609989:other:+|2:other:101611862:+.1	chr2:101609889-101611962	ENSG00000170485	NPAS2	neuronal PAS domain protein 2	cj	NA	0.185	0.028
cj@2:120317602:120319590:+|2:120317602:other:+|2:other:120319590:+.1	chr2:120317502-120319690	ENSG00000163075	PCDP1	Primary ciliary dyskinesia protein 1	cj	NA	-0.23	0.0051
cj@2:174228623:174229523:+|2:174228623:other:+|2:other:174229523:+.1	chr2:174228523-174229623	ENSG00000144354	CDCA7	cell division cycle associated 7	cj	NA	0.11	0.0081
cj@2:20527139:20550358:-|2:other:20550358:-|2:20527139:other:-.1	chr2:20527039-20550458	ENSG00000055917	PUM2	pumilio homolog 2 (Drosophila)	cj	NA	0.18	6.5e-05
cj@2:231334813:231338039:+|2:231334813:other:+|2:other:231338039:+.1	chr2:231334713-231338139	ENSG00000067066	SP100	SP100 nuclear antigen	cj	NA	-0.125	0.0057
cj@2:24384483:24387068:+|2:24384483:other:+|2:other:24387068:+.1	chr2:24384383-24387168	ENSG00000219626	FAM228B	family with sequence similarity 228, member B	cj	NA	0.11	0.04
cj@2:27535976:27545315:-|2:other:27545315:-|2:27535976:other:-.1	chr2:27535876-27545415	ENSG00000115204	MPV17	MpV17 mitochondrial inner membrane protein	cj	NA	-0.1	1.5e-05
cj@2:86437736:86439549:+|2:86437736:other:+|2:other:86439549:+.1	chr2:86437636-86439649	ENSG00000132313	MRPL35	mitochondrial ribosomal protein L35	cj	NA	-0.17	0.0063
cj@2:98410016:98411393:-|2:other:98411393:-|2:98410016:other:-.1	chr2:98409916-98411493	ENSG00000075568	TMEM131	transmembrane protein 131	cj	NA	-0.12	2.1e-06
cj@2:98411578:98412681:-|2:other:98412681:-|2:98411578:other:-.1	chr2:98411478-98412781	ENSG00000075568	TMEM131	transmembrane protein 131	cj	NA	-0.14	2.6e-06
cj@21:34954361:34954471:-|21:other:34954471:-|21:34954361:other:-.1	chr21:34954261-34954571	ENSG00000159147	DONSON	downstream neighbor of SON	cj	NA	-0.255	0.0012
cj@22:38690540:38694791:-|22:other:38694791:-|22:38690540:other:-.1	chr22:38690440-38694891	ENSG00000213923	CSNK1E	casein kinase 1, epsilon	cj	NA	-0.1	0.0056
cj@3:107768498:107769425:-|3:other:107769425:-|3:107768498:other:-.1	chr3:107768398-107769525	ENSG00000196776	CD47	CD47 molecule	cj	NA	-0.135	2.8e-05
cj@3:121500721:121507131:-|3:other:121507131:-|3:121500721:other:-.1	chr3:121500621-121507231	ENSG00000173226	IQCB1	IQ motif containing B1	cj	NA	-0.125	0.035
cj@3:12573158:12574161:+|3:12573158:other:+|3:other:12574161:+.1	chr3:12573058-12574261	ENSG00000154743	TSEN2	tRNA splicing endonuclease 2 homolog (S. cerevisiae)	cj	NA	-0.1	0.017
cj@3:142168444:142171970:-|3:other:142171970:-|3:142168444:other:-.1	chr3:142168344-142172070	ENSG00000175054	ATR	ataxia telangiectasia and Rad3 related	cj	NA	-0.25	2.7e-07
cj@3:169500431:169501265:+|3:169500431:other:+|3:other:169501265:+.1	chr3:169500331-169501365	ENSG00000085274	MYNN	myoneurin	cj	NA	-0.135	0.00043
cj@3:185798964:185823094:-|3:other:185823094:-|3:185798964:other:-.1	chr3:185798864-185823194	ENSG00000244405	ETV5	ets variant 5	cj	NA	-0.115	0.032
cj@4:130027802:130030462:+|4:130027802:other:+|4:other:130030462:+.1	chr4:130027702-130030562	ENSG00000151470	C4orf33	chromosome 4 open reading frame 33	cj	NA	-0.165	0.00021
cj@4:145916755:145985724:-|4:other:145985724:-|4:145916755:other:-.1	chr4:145916655-145985824	ENSG00000164162	ANAPC10	anaphase promoting complex subunit 10	cj	NA	-0.115	0.00032
cj@4:44690163:44691303:+|4:44690163:other:+|4:other:44691303:+.1	chr4:44690063-44691403	ENSG00000151806	GUF1	GUF1 GTPase homolog (S. cerevisiae)	cj	NA	-0.12	0.019
cj@4:48385801:48422142:+|4:48385801:other:+|4:other:48422142:+.1	chr4:48385701-48422242	ENSG00000109171	SLAIN2	SLAIN motif family, member 2	cj	NA	-0.11	1.9e-05
cj@4:5815889:5819938:+|4:5815889:other:+|4:other:5819938:+.1	chr4:5815789-5820038	ENSG00000072840	EVC	Ellis van Creveld syndrome	cj	NA	-0.16	0.045
cj@4:83816000:83816845:-|4:other:83816845:-|4:83816000:other:-.1	chr4:83815900-83816945	ENSG00000251022	THAP9-AS1	NA	cj	NA	-0.165	0.0015
cj@5:131927726:131930561:+|5:131927726:other:+|5:other:131930561:+.1	chr5:131927626-131930661	ENSG00000113522	RAD50	RAD50 homolog (S. cerevisiae)	cj	NA	-0.11	0.013
cj@7:5364879:5372253:-|7:other:5372253:-|7:5364879:other:-.1	chr7:5364779-5372353	ENSG00000182095	TNRC18	trinucleotide repeat containing 18	cj	NA	-0.16	0.0013
cj@7:65439691:65439906:-|7:other:65439906:-|7:65439691:other:-.1	chr7:65439591-65440006	ENSG00000169919	GUSB	glucuronidase, beta	cj	NA	-0.15	1e-05
cj@8:125603476:125711767:-|8:other:125711767:-|8:125603476:other:-.1	chr8:125603376-125711867	ENSG00000170873	MTSS1	metastasis suppressor 1	cj	NA	-0.16	0.018
cj@8:126114388:126114559:+|8:126114388:other:+|8:other:126114559:+.1	chr8:126114288-126114659	ENSG00000156831	NSMCE2	non-SMC element 2, MMS21 homolog (S. cerevisiae)	cj	NA	-0.125	0.00049
cj@8:25303766:25315715:-|8:other:25315715:-|8:25303766:other:-.1	chr8:25303666-25315815	ENSG00000104756	KCTD9	potassium channel tetramerisation domain containing 9	cj	NA	-0.18	0.00012
cj@8:43048986:43052091:+|8:43048986:other:+|8:other:43052091:+.1	chr8:43048886-43052191	ENSG00000165102	HGSNAT	heparan-alpha-glucosaminide N-acetyltransferase	cj	NA	-0.13	0.0016
cj@8:96044326:96046236:+|8:96044326:other:+|8:other:96046236:+.1	chr8:96044226-96046336	ENSG00000156170	NDUFAF6	NADH dehydrogenase (ubiquinone) complex I, assembly factor 6	cj	NA	0.14	0.038
cj@9:131038681:131038866:+|9:131038681:other:+|9:other:131038866:+.1	chr9:131038581-131038966	ENSG00000175854	SWI5	SWI5 recombination repair homolog (yeast)	cj	NA	0.19	3e-05
cj@9:97845001:97848964:+|9:97845001:other:+|9:other:97848964:+.1	chr9:97844901-97849064	ENSG00000148120	C9orf3	chromosome 9 open reading frame 3	cj	NA	0.105	0.0058
cj@X:106332069:106358582:-|X:other:106358582:-|X:106332069:other:-.1	chrX:106331969-106358682	ENSG00000089682	RBM41	RNA binding motif protein 41	cj	NA	-0.1	0.021
cj@X:128581210:128582310:-|X:other:128582310:-|X:128581210:other:-.1	chrX:128581110-128582410	ENSG00000102038	SMARCA1	SWI/SNF related, matrix associated, actin dependent regulator of chromatin, subfamily a, member 1	cj	NA	0.125	1.6e-06
cj@X:41413168:41414853:-|X:other:41414853:-|X:41413168:other:-.1	chrX:41413068-41414953	ENSG00000147044	CASK	calcium/calmodulin-dependent serine protein kinase (MAGUK family)	cj	NA	0.195	0.014
mxe@1:163289081:163291412:-|1:163278421:163291412:-.1	chr1:163276019-163291512	ENSG00000232995	RP11-267N12.3	NA	mxe	NA	-0.1	0.01
mxe@1:179846508:179846828:-|1:179834989:179846828:-.1	chr1:179821846-179846928	ENSG00000169905	TOR1AIP2	torsin A interacting protein 2	mxe	NA	-0.105	0.00017
mxe@1:207512762:207513736:+|1:207512762:207531861:+.1	chr1:207512662-207532991	ENSG00000196352	CD55	CD55 molecule, decay accelerating factor for complement (Cromer blood group)	mxe	FALSE	0.13	0.012
mxe@1:29379824:29385101:+|1:29379824:29386934:+.1	chr1:29379724-29391594	ENSG00000159023	EPB41	erythrocyte membrane protein band 4.1 (elliptocytosis 1, RH-linked)	mxe	NA	-0.125	0.02
mxe@10:105155789:105156166:-|10:105154151:105156166:-.1	chr10:105152123-105156266	ENSG00000173915	USMG5	up-regulated during skeletal muscle growth 5 homolog (mouse)	mxe	NA	-0.11	0.00014
mxe@10:99206110:99207951:+|10:99206110:99210114:+.1	chr10:99206010-99211528	ENSG00000171307	ZDHHC16	zinc finger, DHHC-type containing 16	mxe	NA	-0.285	2e-05
mxe@11:134123603:134126442:+|11:134123603:134126982:+.1	chr11:134123503-134128509	ENSG00000151498	ACAD8	acyl-CoA dehydrogenase family, member 8	mxe	NA	0.105	0.00029
mxe@11:35211612:35219668:+|11:35211612:35226059:+.1	chr11:35211512-35229752	ENSG00000026508	CD44	CD44 molecule (Indian blood group)	mxe	NA	0.12	0.011
mxe@11:35211612:35219668:+|11:35211612:35232793:+.1	chr11:35211512-35236499	ENSG00000026508	CD44	CD44 molecule (Indian blood group)	mxe	NA	0.125	0.047
mxe@11:46639440:46639810:+|11:46639440:46642610:+.1	chr11:46639340-46665929	ENSG00000175224	ATG13	autophagy related 13	mxe	NA	-0.13	0.0016
mxe@12:27521345:27523062:+|12:27521345:27529279:+.1	chr12:27521245-27533280	ENSG00000029153	ARNTL2	aryl hydrocarbon receptor nuclear translocator-like 2	mxe	NA	0.1	0.048
mxe@12:51442968:51447561:+|12:51442968:51449618:+.1	chr12:51442868-51450027	ENSG00000050426	LETMD1	LETM1 domain containing 1	mxe	FALSE	-0.125	0.00087
mxe@12:51442968:51447595:+|12:51442968:51449618:+.1	chr12:51442868-51450027	ENSG00000050426	LETMD1	LETM1 domain containing 1	mxe	NA	-0.125	0.0038
mxe@12:70672054:70679180:+|12:70672054:70687851:+.1	chr12:70671954-70704775	ENSG00000111596	CNOT2	CCR4-NOT transcription complex, subunit 2	mxe	NA	-0.17	1.2e-07
mxe@12:70672054:70687851:+|12:70672054:70695485:+.1	chr12:70671954-70704775	ENSG00000111596	CNOT2	CCR4-NOT transcription complex, subunit 2	mxe	NA	0.135	3.5e-08
mxe@14:24459568:24464241:+|14:24459568:24470593:+.1	chr14:24459468-24473646	ENSG00000187630	DHRS4L2	dehydrogenase/reductase (SDR family) member 4 like 2	mxe	NA	-0.11	0.013
mxe@14:31398517:31404369:-|14:31388312:31404369:-.1	chr14:31382763-31404469	ENSG00000196792	STRN3	striatin, calmodulin binding protein 3	mxe	NA	-0.185	6.9e-06
mxe@15:23034006:23034147:-|15:23033413:23034147:-.1	chr15:23021329-23034247	ENSG00000140157	NIPA2	non imprinted in Prader-Willi/Angelman syndrome 2	mxe	NA	0.2	0.00019
mxe@16:16427741:16429718:+|16:16427741:16429909:+.1	chr16:16427641-16434263	ENSG00000183889	PKD1P1	NPIP-like protein 1	mxe	NA	-0.135	0.02
mxe@16:16442589:16443086:+|16:16442589:16443768:+.1	chr16:16442489-16444049	ENSG00000183889	PKD1P1	NPIP-like protein 1	mxe	FALSE	0.18	0.038
mxe@16:67201125:67201206:+|16:67201125:67201364:+.1	chr16:67201025-67201827	ENSG00000102878	HSF4	heat shock transcription factor 4	mxe	NA	0.115	2e-06
mxe@16:67201125:67201206:+|16:67201125:67201378:+.1	chr16:67201025-67201827	ENSG00000102878	HSF4	heat shock transcription factor 4	mxe	FALSE	0.14	1.8e-06
mxe@16:86585898:86588251:-|16:86585752:86588251:-.1	chr16:86582083-86588351	ENSG00000103248	MTHFSD	methenyltetrahydrofolate synthetase domain containing	mxe	NA	0.125	0.0049
mxe@18:12793573:12794383:-|18:12788149:12794383:-.1	chr18:12785743-12794483	ENSG00000175354	PTPN2	protein tyrosine phosphatase, non-receptor type 2	mxe	NA	0.21	0.0017
mxe@18:59942706:59947007:+|18:59942706:59947593:+.1	chr18:59942606-59947979	ENSG00000134444	KIAA1468	KIAA1468	mxe	NA	-0.135	0.0016
mxe@19:50080994:50083772:-|19:50080134:50083772:-.1	chr19:50063849-50083872	ENSG00000142546	NOSIP	nitric oxide synthase interacting protein	mxe	NA	-0.17	0.046
mxe@2:10537046:10546391:+|2:10537046:10548685:+.1	chr2:10536946-10559960	ENSG00000115756	HPCAL1	hippocalcin-like 1	mxe	NA	-0.135	0.042
mxe@2:172271236:172290393:-|2:172248707:172290393:-.1	chr2:172216923-172290493	ENSG00000123600	METTL8	methyltransferase like 8	mxe	NA	0.165	0.00085
mxe@2:223511715:223513459:-|2:223509284:223513459:-.1	chr2:223507624-223513559	ENSG00000116120	FARSB	phenylalanyl-tRNA synthetase, beta subunit	mxe	NA	0.145	0.0013
mxe@2:228205096:228207461:+|2:228205096:228217230:+.1	chr2:228204996-228220493	ENSG00000168958	MFF	mitochondrial fission factor	mxe	NA	0.175	3.7e-07
mxe@2:241451418:241452219:-|2:241448872:241452219:-.1	chr2:241447008-241452319	ENSG00000144504	ANKMY1	ankyrin repeat and MYND domain containing 1	mxe	NA	0.16	0.002
mxe@2:64068366:64069673:+|2:64068366:64082018:+.1	chr2:64068266-64083540	ENSG00000169764	UGP2	UDP-glucose pyrophosphorylase 2	mxe	NA	0.34	0.00045
mxe@20:35399876:35402065:-|20:35399596:35402065:-.1	chr20:35396345-35402165	ENSG00000149636	DSN1	DSN1, MIND kinetochore complex component, homolog (S. cerevisiae)	mxe	NA	0.1	0.021
mxe@21:34957032:34958284:-|21:34955972:34958284:-.1	chr21:34954452-34958384	ENSG00000159147	DONSON	downstream neighbor of SON	mxe	NA	0.2	1.1e-05
mxe@21:34957074:34958284:-|21:34955972:34958284:-.1	chr21:34954452-34958384	ENSG00000159147	DONSON	downstream neighbor of SON	mxe	NA	0.15	4.1e-05
mxe@21:44521542:44524425:-|21:44520724:44524425:-.1	chr21:44515753-44524525	ENSG00000160201	U2AF1	U2 small nuclear RNA auxiliary factor 1	mxe	FALSE	-0.145	4.8e-05
mxe@3:176816329:176914128:-|3:176782810:176914128:-.1	chr3:176771606-176914228	ENSG00000177565	TBL1XR1	transducin (beta)-like 1 X-linked receptor 1	mxe	NA	0.125	0.0016
mxe@3:196803553:196807922:-|3:196802741:196807922:-.1	chr3:196796031-196808022	ENSG00000075711	DLG1	discs, large homolog 1 (Drosophila)	mxe	NA	0.115	0.00062
mxe@3:196803556:196807922:-|3:196802741:196807922:-.1	chr3:196796031-196808022	ENSG00000075711	DLG1	discs, large homolog 1 (Drosophila)	mxe	NA	0.13	0.00021
mxe@3:50603525:50604894:-|3:50603292:50604894:-.1	chr3:50599078-50604994	ENSG00000088543	C3orf18	chromosome 3 open reading frame 18	mxe	NA	0.165	0.0001
mxe@5:131534073:131534572:-|5:131533964:131534572:-.1	chr5:131531073-131534672	ENSG00000072682	P4HA2	prolyl 4-hydroxylase, alpha polypeptide II	mxe	NA	0.115	4e-07
mxe@6:30525227:30525927:+|6:30525227:30529105:+.1	chr6:30525127-30529711	ENSG00000204576	PRR3	proline rich 3	mxe	FALSE	0.12	0.014
mxe@8:79650870:79652237:-|8:79648762:79652237:-.1	chr8:79645967-79652337	ENSG00000104432	IL7	interleukin 7	mxe	NA	-0.135	0.017
mxe@9:134378460:134379576:+|9:134378460:134381501:+.1	chr9:134378360-134381890	ENSG00000130714	POMT1	protein-O-mannosyltransferase 1	mxe	NA	-0.1	2.4e-05
mxe@X:110928331:110932315:+|X:110928331:110951255:+.1	chrX:110928231-110952293	ENSG00000101901	ALG13	asparagine-linked glycosylation 13 homolog (S. cerevisiae)	mxe	TRUE	0.105	0.041
mxe@X:44918711:44919267:+|X:44918711:44919854:+.1	chrX:44918611-44920669	ENSG00000147050	KDM6A	lysine (K)-specific demethylase 6A	mxe	NA	-0.175	7.7e-05
ri@1:155884111:155885664:-|1:155885663:155885664:-.1	chr1:155884011-155885764	ENSG00000132680	KIAA0907	KIAA0907	ri	NA	0.105	0.024
ri@1:180165734:180166468:+|1:180165734:180165735:+.1	chr1:180165634-180166568	ENSG00000116260	QSOX1	quiescin Q6 sulfhydryl oxidase 1	ri	NA	0.115	0.0018
ri@1:180166025:180166468:+|1:180166025:180166026:+.1	chr1:180165925-180166568	ENSG00000116260	QSOX1	quiescin Q6 sulfhydryl oxidase 1	ri	TRUE	0.125	0.004
ri@1:25570124:25571641:-|1:25571640:25571641:-.1	chr1:25570024-25571741	ENSG00000117616	C1orf63	chromosome 1 open reading frame 63	ri	FALSE	0.185	0.041
ri@1:3547681:3548030:-|1:3548029:3548030:-.1	chr1:3547581-3548130	ENSG00000116213	WRAP73	WD repeat containing, antisense to TP73	ri	NA	-0.155	0.00016
ri@10:24834032:24834756:+|10:24834032:24834033:+.1	chr10:24833932-24834856	ENSG00000120549	KIAA1217	KIAA1217	ri	NA	-0.17	0.026
ri@12:31264743:31265915:-|12:31265914:31265915:-.1	chr12:31264643-31266015	ENSG00000177359	RP11-551L14.1	NA	ri	NA	-0.23	0.021
ri@14:24584601:24584752:+|14:24584601:24584602:+.1	chr14:24584501-24584852	ENSG00000100897	DCAF11	DDB1 and CUL4 associated factor 11	ri	NA	0.16	0.0016
ri@15:83144340:83145511:-|15:83145510:83145511:-.1	chr15:83144240-83145611	ENSG00000259472	RP13-996F3.3	NA	ri	NA	-0.66	0.013
ri@16:1825133:1825316:+|16:1825133:1825134:+.1	chr16:1825033-1825416	ENSG00000197774	EME2	essential meiotic endonuclease 1 homolog 2 (S. pombe)	ri	FALSE	-0.115	0.028
ri@16:21172329:21172406:+|16:21172329:21172330:+.1	chr16:21172229-21172506	ENSG00000011638	TMEM159	transmembrane protein 159	ri	NA	0.165	0.0091
ri@16:28847497:28847647:+|16:28847497:28847498:+.1	chr16:28847397-28847747	ENSG00000168488	ATXN2L	ataxin 2-like	ri	FALSE	-0.115	0.043
ri@16:28847497:28848049:+|16:28847497:28847498:+.1	chr16:28847397-28848149	ENSG00000168488	ATXN2L	ataxin 2-like	ri	NA	-0.105	0.008
ri@16:28847811:28848049:+|16:28847811:28847812:+.1	chr16:28847711-28848149	ENSG00000168488	ATXN2L	ataxin 2-like	ri	NA	-0.105	0.0014
ri@17:1615693:1616997:-|17:1616996:1616997:-.1	chr17:1615593-1617097	ENSG00000186594	MIR22HG	NA	ri	NA	-0.14	0.0055
ri@19:40871492:40871625:+|19:40871492:40871493:+.1	chr19:40871392-40871725	ENSG00000105223	PLD3	phospholipase D family, member 3	ri	NA	0.145	0.0031
ri@19:6466620:6466962:+|19:6466620:6466621:+.1	chr19:6466520-6467062	ENSG00000130545	CRB3	crumbs homolog 3 (Drosophila)	ri	NA	0.155	0.0023
ri@2:61412753:61413581:+|2:61412753:61412754:+.1	chr2:61412653-61413681	ENSG00000173209	AHSA2	AHA1, activator of heat shock 90kDa protein ATPase homolog 2 (yeast)	ri	FALSE	0.13	0.03
ri@22:50181142:50181225:-|22:50181224:50181225:-.1	chr22:50181042-50181325	ENSG00000100425	BRD1	bromodomain containing 1	ri	TRUE	-0.14	0.00038
ri@3:46716229:46717108:-|3:46717107:46717108:-.1	chr3:46716129-46717208	ENSG00000178038	ALS2CL	ALS2 C-terminal like	ri	FALSE	0.225	0.041
ri@3:49048949:49049068:+|3:49048949:49048950:+.1	chr3:49048849-49049168	ENSG00000178252	WDR6	WD repeat domain 6	ri	NA	-0.125	8e-06
ri@4:15688771:15690174:+|4:15688771:15688772:+.1	chr4:15688671-15690274	ENSG00000237765	FAM200B	family with sequence similarity 200, member B	ri	NA	-0.15	0.01
ri@4:4419654:4420511:+|4:4419654:4419655:+.1	chr4:4419554-4420611	ENSG00000168824	NSG1	Neuron-specific protein family member 1	ri	TRUE	-0.155	0.013
ri@6:159083844:159084237:+|6:159083844:159083845:+.1	chr6:159083744-159084337	ENSG00000164674	SYTL3	synaptotagmin-like 3	ri	NA	0.11	0.0064
ri@7:76958708:76959556:-|7:76959555:76959556:-.1	chr7:76958608-76959656	ENSG00000186088	PION	pigeon homolog (Drosophila)	ri	FALSE	-0.115	0.0091
ri@X:48341182:48341374:+|X:48341182:48341183:+.1	chrX:48341082-48341474	ENSG00000068438	FTSJ1	FtsJ RNA methyltransferase homolog 1 (E. coli)	ri	FALSE	-0.115	3e-05
se@1:110921978:110923604:-|1:110919783:110923604:-.1	chr1:110919683-110923704	ENSG00000168679	SLC16A4	solute carrier family 16, member 4 (monocarboxylic acid transporter 5)	se	NA	-0.185	6.1e-05
se@1:113247790:113249700:-|1:113246428:113249700:-.1	chr1:113246328-113249800	ENSG00000155366	RHOC	ras homolog family member C	se	NA	0.125	0.00062
se@1:150941607:150947095:-|1:150940988:150947095:-.1	chr1:150940888-150947195	ENSG00000143418	CERS2	ceramide synthase 2	se	NA	-0.105	0.0058
se@1:150990380:150990943:+|1:150990380:150997087:+.1	chr1:150990280-150997187	ENSG00000143363	PRUNE	prune homolog (Drosophila)	se	FALSE	-0.17	0.00012
se@1:153600074:153603487:-|1:153599009:153603487:-.1	chr1:153598909-153603587	ENSG00000189171	S100A13	S100 calcium binding protein A13	se	NA	-0.115	0.025
se@1:155880595:155881034:-|1:155880297:155881034:-.1	chr1:155880197-155881134	ENSG00000143622	RIT1	Ras-like without CAAX 1	se	NA	-0.14	2.8e-07
se@1:156119884:156123318:+|1:156119884:156124341:+.1	chr1:156119784-156124441	ENSG00000196189	SEMA4A	sema domain, immunoglobulin domain (Ig), transmembrane domain (TM) and short cytoplasmic domain, (semaphorin) 4A	se	NA	-0.11	0.042
se@1:156119884:156123322:+|1:156119884:156124341:+.1	chr1:156119784-156124441	ENSG00000196189	SEMA4A	sema domain, immunoglobulin domain (Ig), transmembrane domain (TM) and short cytoplasmic domain, (semaphorin) 4A	se	NA	-0.105	0.041
se@1:160535535:160549182:-|1:160523936:160549182:-.1	chr1:160523836-160549282	ENSG00000066294	CD84	CD84 molecule	se	NA	-0.16	0.03
se@1:160719883:160720094:+|1:160719883:160721976:+.1	chr1:160719783-160722076	ENSG00000026751	SLAMF7	SLAM family member 7	se	NA	-0.15	0.011
se@1:167974031:167992226:+|1:167974031:168007609:+.1	chr1:167973931-168007709	ENSG00000143164	DCAF6	DDB1 and CUL4 associated factor 6	se	NA	0.13	0.0002
se@1:171557644:171560291:+|1:171557644:171560726:+.1	chr1:171557544-171560826	ENSG00000117523	PRRC2C	proline-rich coiled-coil 2C	se	NA	-0.16	2.9e-06
se@1:173684217:173684662:+|1:173684217:173685142:+.1	chr1:173684117-173685242	ENSG00000076321	KLHL20	kelch-like family member 20	se	NA	0.1	0.0013
se@1:181019422:181021371:+|1:181019422:181022709:+.1	chr1:181019322-181022809	ENSG00000153029	MR1	major histocompatibility complex, class I-related	se	NA	-0.185	3.1e-06
se@1:192989511:192990227:-|1:192987950:192990227:-.1	chr1:192987850-192990327	ENSG00000116750	UCHL5	ubiquitin carboxyl-terminal hydrolase L5	se	NA	0.175	8.9e-05
se@1:193028906:193038164:+|1:193028906:193044950:+.1	chr1:193028806-193045050	ENSG00000116747	TROVE2	TROVE domain family, member 2	se	NA	-0.125	0.004
se@1:20072144:20072949:-|1:20067434:20072949:-.1	chr1:20067334-20073049	ENSG00000162542	TMCO4	transmembrane and coiled-coil domains 4	se	NA	-0.155	0.0023
se@1:202746222:202777230:-|1:202743863:202777230:-.1	chr1:202743763-202777330	ENSG00000117139	KDM5B	lysine (K)-specific demethylase 5B	se	NA	-0.115	0.033
se@1:204226016:204226481:-|1:204219742:204226481:-.1	chr1:204219642-204226581	ENSG00000143850	PLEKHA6	pleckstrin homology domain containing, family A member 6	se	NA	0.11	0.00092
se@1:213244383:213251038:+|1:213244383:213277796:+.1	chr1:213244283-213277896	ENSG00000136643	RPS6KC1	ribosomal protein S6 kinase, 52kDa, polypeptide 1	se	FALSE	-0.1	0.0046
se@1:226067110:226070004:-|1:226065294:226070004:-.1	chr1:226065194-226070104	ENSG00000196187	TMEM63A	transmembrane protein 63A	se	NA	-0.1	0.035
se@1:235377341:235383108:-|1:235359430:235383108:-.1	chr1:235359330-235383208	ENSG00000054267	ARID4B	AT rich interactive domain 4B (RBP1-like)	se	NA	0.12	0.032
se@1:243449699:243456393:+|1:243449699:243468015:+.1	chr1:243449599-243468115	ENSG00000054282	SDCCAG8	serologically defined colon cancer antigen 8	se	NA	-0.105	0.00078
se@1:245133745:245165423:+|1:245133745:245180544:+.1	chr1:245133645-245180644	ENSG00000203666	EFCAB2	EF-hand calcium binding domain 2	se	FALSE	-0.2	0.00051
se@1:246729965:246754814:+|1:246729965:246784731:+.1	chr1:246729865-246784831	ENSG00000162852	CNST	consortin, connexin sorting protein	se	NA	-0.14	0.019
se@1:25570989:25571641:-|1:25570124:25571641:-.1	chr1:25570024-25571741	ENSG00000117616	C1orf63	chromosome 1 open reading frame 63	se	TRUE	-0.125	0.00031
se@1:27736700:27739066:-|1:27734840:27739066:-.1	chr1:27734740-27739166	ENSG00000158195	WASF2	WAS protein family, member 2	se	NA	-0.115	0.047
se@1:28071322:28075579:+|1:28071322:28081706:+.1	chr1:28071222-28081806	ENSG00000009780	FAM76A	family with sequence similarity 76, member A	se	NA	0.115	0.0015
se@1:28199176:28203099:+|1:28199176:28209024:+.1	chr1:28199076-28209124	ENSG00000130775	THEMIS2	thymocyte selection associated family member 2	se	NA	-0.135	0.02
se@1:29379824:29385101:+|1:29379824:29391494:+.1	chr1:29379724-29391594	ENSG00000159023	EPB41	erythrocyte membrane protein band 4.1 (elliptocytosis 1, RH-linked)	se	NA	-0.11	0.022
se@1:31465507:31501643:-|1:31454252:31501643:-.1	chr1:31454152-31501743	ENSG00000134644	PUM1	pumilio homolog 1 (Drosophila)	se	TRUE	-0.105	0.045
se@1:40029594:40030095:-|1:40029413:40030095:-.1	chr1:40029313-40030195	ENSG00000090621	PABPC4	poly(A) binding protein, cytoplasmic 4 (inducible form)	se	NA	-0.12	3.1e-06
se@1:44058272:44063419:+|1:44058272:44064391:+.1	chr1:44058172-44064491	ENSG00000142949	PTPRF	protein tyrosine phosphatase, receptor type, F	se	NA	-0.115	0.033
se@1:47154216:47155259:-|1:47152542:47155259:-.1	chr1:47152442-47155359	ENSG00000159658	EFCAB14	EF-hand calcium binding domain 14	se	NA	-0.185	0.0016
se@1:52947307:52947476:-|1:52943554:52947476:-.1	chr1:52943454-52947576	ENSG00000134744	ZCCHC11	zinc finger, CCHC domain containing 11	se	NA	-0.11	0.017
se@1:53372283:53373540:-|1:53370762:53373540:-.1	chr1:53370662-53373640	ENSG00000121310	ECHDC2	enoyl CoA hydratase domain containing 2	se	NA	0.16	0.0025
se@1:63913285:63919589:-|1:63912527:63919589:-.1	chr1:63912427-63919689	ENSG00000142856	ITGB3BP	integrin beta 3 binding protein (beta3-endonexin)	se	TRUE	0.115	0.0016
se@1:71531431:71532459:-|1:71530820:71532459:-.1	chr1:71530720-71532559	ENSG00000132485	ZRANB2	zinc finger, RAN-binding domain containing 2	se	TRUE	0.125	0.0044
se@1:71531435:71532459:-|1:71530820:71532459:-.1	chr1:71530720-71532559	ENSG00000132485	ZRANB2	zinc finger, RAN-binding domain containing 2	se	NA	0.15	0.0014
se@1:75172888:75175782:-|1:75172678:75175782:-.1	chr1:75172578-75175882	ENSG00000116791	CRYZ	crystallin, zeta (quinone reductase)	se	NA	-0.195	1.4e-05
se@1:93592856:93594835:+|1:93592856:93599260:+.1	chr1:93592756-93599360	ENSG00000143033	MTF2	metal response element binding transcription factor 2	se	NA	-0.11	0.001
se@1:93804831:93804914:-|1:93791452:93804914:-.1	chr1:93791352-93805014	ENSG00000223745	RP4-717I23.3	NA	se	NA	-0.13	0.02
se@1:95171113:95197814:-|1:95145163:95197814:-.1	chr1:95145063-95197914	ENSG00000224081	RP11-86H7.1	NA	se	NA	0.17	0.0004
se@10:101507147:101510126:+|10:101507147:101514286:+.1	chr10:101507047-101514386	ENSG00000119929	CUTC	cutC copper transporter homolog (E. coli)	se	FALSE	0.105	0.00057
se@10:115923088:115933774:-|10:115917439:115933774:-.1	chr10:115917339-115933874	ENSG00000165813	C10orf118	chromosome 10 open reading frame 118	se	NA	-0.205	0.027
se@10:116207779:116211383:-|10:116205162:116211383:-.1	chr10:116205062-116211483	ENSG00000099204	ABLIM1	actin binding LIM protein 1	se	NA	-0.16	0.026
se@10:123278343:123279493:-|10:123276977:123279493:-.1	chr10:123276877-123279593	ENSG00000066468	FGFR2	fibroblast growth factor receptor 2	se	TRUE	-0.14	0.017
se@10:127574245:127584787:-|10:127569640:127584787:-.1	chr10:127569540-127584887	ENSG00000089876	DHX32	DEAH (Asp-Glu-Ala-His) box polypeptide 32	se	NA	0.115	0.014
se@10:13150289:13150962:+|10:13150289:13151112:+.1	chr10:13150189-13151212	ENSG00000123240	OPTN	optineurin	se	NA	0.145	0.00024
se@10:14595386:14598015:-|10:14572514:14598015:-.1	chr10:14572414-14598115	ENSG00000065809	FAM107B	family with sequence similarity 107, member B	se	NA	0.125	0.001
se@10:14595386:14598361:-|10:14572514:14598361:-.1	chr10:14572414-14598461	ENSG00000065809	FAM107B	family with sequence similarity 107, member B	se	NA	0.115	0.0005
se@10:14595386:14613923:-|10:14572514:14613923:-.1	chr10:14572414-14614023	ENSG00000065809	FAM107B	family with sequence similarity 107, member B	se	NA	0.14	0.0023
se@10:14595386:14613990:-|10:14572514:14613990:-.1	chr10:14572414-14614090	ENSG00000065809	FAM107B	family with sequence similarity 107, member B	se	NA	0.125	0.0011
se@10:14595386:14614228:-|10:14572514:14614228:-.1	chr10:14572414-14614328	ENSG00000065809	FAM107B	family with sequence similarity 107, member B	se	NA	0.11	0.0012
se@10:27044670:27054147:-|10:27040712:27054147:-.1	chr10:27040612-27054247	ENSG00000136754	ABI1	abl-interactor 1	se	NA	0.1	0.0049
se@10:32128639:32132389:-|10:32120728:32132389:-.1	chr10:32120628-32132489	ENSG00000165322	ARHGAP12	Rho GTPase activating protein 12	se	NA	-0.125	0.0045
se@10:34661464:34663802:-|10:34649187:34663802:-.1	chr10:34649087-34663902	ENSG00000148498	PARD3	par-3 partitioning defective 3 homolog (C. elegans)	se	NA	-0.12	0.00019
se@10:52226692:52279591:-|10:52220574:52279591:-.1	chr10:52220474-52279691	ENSG00000198964	SGMS1	sphingomyelin synthase 1	se	NA	-0.135	0.037
se@10:69647291:69648640:+|10:69647291:69651160:+.1	chr10:69647191-69651260	ENSG00000096717	SIRT1	sirtuin 1	se	FALSE	-0.115	0.013
se@10:74923708:74927624:-|10:74920309:74927624:-.1	chr10:74920209-74927724	ENSG00000122882	ECD	ecdysoneless homolog (Drosophila)	se	NA	-0.125	0.0021
se@10:75482335:75485719:-|10:75481262:75485719:-.1	chr10:75481162-75485819	ENSG00000242288	RP11-464F9.1	NA	se	NA	-0.16	0.0048
se@10:97447476:97452677:-|10:97446916:97452677:-.1	chr10:97446816-97452777	ENSG00000119977	TCTN3	tectonic family member 3	se	TRUE	-0.155	0.0054
se@10:99258149:99258453:-|10:99243908:99258453:-.1	chr10:99243808-99258553	ENSG00000155229	MMS19	MMS19 nucleotide excision repair homolog (S. cerevisiae)	se	NA	-0.15	0.00023
se@11:118085601:118095656:-|11:118083276:118095656:-.1	chr11:118083176-118095756	ENSG00000160593	AMICA1	adhesion molecule, interacts with CXADR antigen 1	se	NA	-0.105	0.023
se@11:118107975:118110926:-|11:118106304:118110926:-.1	chr11:118106204-118111026	ENSG00000160588	MPZL3	myelin protein zero-like 3	se	FALSE	-0.225	0.013
se@11:118403922:118404135:+|11:118403922:118404572:+.1	chr11:118403822-118404672	ENSG00000149582	TMEM25	transmembrane protein 25	se	NA	-0.125	0.02
se@11:125496728:125497502:+|11:125496728:125499127:+.1	chr11:125496628-125499227	ENSG00000149554	CHEK1	checkpoint kinase 1	se	FALSE	-0.14	0.0021
se@11:134126542:134126982:+|11:134126542:134128409:+.1	chr11:134126442-134128509	ENSG00000151498	ACAD8	acyl-CoA dehydrogenase family, member 8	se	FALSE	-0.15	0.00032
se@11:26584812:26586712:-|11:26582772:26586712:-.1	chr11:26582672-26586812	ENSG00000169550	MUC15	mucin 15, cell surface associated	se	NA	-0.2	0.00024
se@11:31477933:31484719:-|11:31455117:31484719:-.1	chr11:31455017-31484819	ENSG00000148950	IMMP1L	IMP1 inner mitochondrial membrane peptidase-like (S. cerevisiae)	se	TRUE	0.145	0.002
se@11:31477933:31531066:-|11:31455117:31531066:-.1	chr11:31455017-31531166	ENSG00000148950	IMMP1L	IMP1 inner mitochondrial membrane peptidase-like (S. cerevisiae)	se	NA	0.165	0.00023
se@11:31482261:31484719:-|11:31477933:31484719:-.1	chr11:31477833-31484819	ENSG00000148950	IMMP1L	IMP1 inner mitochondrial membrane peptidase-like (S. cerevisiae)	se	FALSE	0.115	0.0032
se@11:33753014:33755041:-|11:33744009:33755041:-.1	chr11:33743909-33755141	ENSG00000085063	CD59	CD59 molecule, complement regulatory protein	se	NA	-0.155	0.0049
se@11:43333746:43340190:+|11:43333746:43342371:+.1	chr11:43333646-43342471	ENSG00000166181	API5	apoptosis inhibitor 5	se	NA	-0.13	0.013
se@11:48131628:48134299:+|11:48131628:48142555:+.1	chr11:48131528-48142655	ENSG00000149177	PTPRJ	protein tyrosine phosphatase, receptor type, J	se	NA	-0.155	0.022
se@11:48134535:48142555:+|11:48134535:48145165:+.1	chr11:48134435-48145265	ENSG00000149177	PTPRJ	protein tyrosine phosphatase, receptor type, J	se	NA	-0.15	0.0061
se@11:57505140:57505826:+|11:57505140:57506136:+.1	chr11:57505040-57506236	ENSG00000213593	TMX2	thioredoxin-related transmembrane protein 2	se	FALSE	-0.115	0.012
se@11:61908516:61908972:+|11:61908516:61912454:+.1	chr11:61908416-61912554	ENSG00000149503	INCENP	inner centromere protein antigens 135/155kDa	se	NA	0.115	0.02
se@11:63670630:63671458:+|11:63670630:63672258:+.1	chr11:63670530-63672358	ENSG00000072518	MARK2	MAP/microtubule affinity-regulating kinase 2	se	NA	-0.125	0.0011
se@11:71727306:71727454:-|11:71721900:71727454:-.1	chr11:71721800-71727554	ENSG00000137497	NUMA1	nuclear mitotic apparatus protein 1	se	NA	-0.155	0.046
se@11:72403830:72404370:-|11:72399582:72404370:-.1	chr11:72399482-72404470	ENSG00000186635	ARAP1	ArfGAP with RhoGAP domain, ankyrin repeat and PH domain 1	se	NA	0.15	0.00082
se@11:73429763:73431891:-|11:73427407:73431891:-.1	chr11:73427307-73431991	ENSG00000175582	RAB6A	RAB6A, member RAS oncogene family	se	FALSE	-0.12	0.0023
se@11:74555004:74555213:-|11:74554498:74555213:-.1	chr11:74554398-74555313	ENSG00000166435	XRRA1	X-ray radiation resistance associated 1	se	NA	0.12	0.0044
se@11:9406394:9424837:+|11:9406394:9430033:+.1	chr11:9406294-9430133	ENSG00000205339	IPO7	importin 7	se	FALSE	-0.125	0.02
se@12:102183835:102190455:-|12:102182367:102190455:-.1	chr12:102182267-102190555	ENSG00000111670	GNPTAB	N-acetylglucosamine-1-phosphate transferase, alpha and beta subunits	se	NA	-0.135	0.0022
se@12:109095099:109125205:-|12:109072170:109125205:-.1	chr12:109072070-109125305	ENSG00000110880	CORO1C	coronin, actin binding protein, 1C	se	NA	-0.105	0.05
se@12:109999134:109999225:-|12:109998909:109999225:-.1	chr12:109998809-109999325	ENSG00000139428	MMAB	methylmalonic aciduria (cobalamin deficiency) cblB type	se	TRUE	0.185	0.0037
se@12:110383154:110385061:-|12:110377052:110385061:-.1	chr12:110376952-110385161	ENSG00000139436	GIT2	G protein-coupled receptor kinase interacting ArfGAP 2	se	NA	0.11	0.016
se@12:112374634:112374964:-|12:112371834:112374964:-.1	chr12:112371734-112375064	ENSG00000198270	TMEM116	transmembrane protein 116	se	TRUE	-0.105	0.0029
se@12:113376512:113379375:+|12:113376512:113382281:+.1	chr12:113376412-113382381	ENSG00000111331	OAS3	2'-5'-oligoadenylate synthetase 3, 100kDa	se	FALSE	-0.14	0.0026
se@12:118540975:118541398:-|12:118533619:118541398:-.1	chr12:118533519-118541498	ENSG00000176834	VSIG10	V-set and immunoglobulin domain containing 10	se	TRUE	0.115	0.028
se@12:121017726:121018918:-|12:121017400:121018918:-.1	chr12:121017300-121019018	ENSG00000167272	POP5	processing of precursor 5, ribonuclease P/MRP subunit (S. cerevisiae)	se	NA	-0.1	0.011
se@12:122709295:122710512:-|12:122702944:122710512:-.1	chr12:122702844-122710612	ENSG00000184047	DIABLO	diablo, IAP-binding mitochondrial protein	se	NA	-0.15	0.00067
se@12:133660147:133677573:+|12:133660147:133682096:+.1	chr12:133660047-133682196	ENSG00000196387	ZNF140	zinc finger protein 140	se	TRUE	0.145	0.0003
se@12:16035753:16036475:+|12:16035753:16042862:+.1	chr12:16035653-16042962	ENSG00000023734	STRAP	serine/threonine kinase receptor associated protein	se	FALSE	-0.155	3.7e-06
se@12:27067511:27068935:-|12:27067061:27068935:-.1	chr12:27066961-27069035	ENSG00000064102	ASUN	asunder, spermatogenesis regulator	se	NA	-0.11	8.5e-07
se@12:27110676:27113448:+|12:27110676:27116275:+.1	chr12:27110576-27116375	ENSG00000111790	FGFR1OP2	FGFR1 oncogene partner 2	se	NA	0.12	0.037
se@12:31458057:31478958:-|12:31451158:31478958:-.1	chr12:31451058-31479058	ENSG00000139146	FAM60A	family with sequence similarity 60, member A	se	NA	0.17	2.1e-05
se@12:32113805:32123123:+|12:32113805:32133812:+.1	chr12:32113705-32133912	ENSG00000174718	KIAA1551	KIAA1551	se	NA	-0.105	0.025
se@12:42729776:42745687:+|12:42729776:42748963:+.1	chr12:42729676-42749063	ENSG00000134283	PPHLN1	periphilin 1	se	NA	-0.12	0.0027
se@12:44162075:44165023:+|12:44162075:44165983:+.1	chr12:44161975-44166083	ENSG00000198001	IRAK4	interleukin-1 receptor-associated kinase 4	se	FALSE	0.105	0.013
se@12:4645377:4647575:-|12:4643468:4647575:-.1	chr12:4643368-4647675	ENSG00000047621	C12orf4	chromosome 12 open reading frame 4	se	NA	0.13	0.0012
se@12:50835426:50847243:+|12:50835426:50848097:+.1	chr12:50835326-50848197	ENSG00000161813	LARP4	La ribonucleoprotein domain family, member 4	se	NA	-0.125	0.0004
se@12:51442261:51442796:+|12:51442261:51450133:+.1	chr12:51442161-51450233	ENSG00000050426	LETMD1	LETM1 domain containing 1	se	NA	-0.15	0.0017
se@12:51442261:51442817:+|12:51442261:51450133:+.1	chr12:51442161-51450233	ENSG00000050426	LETMD1	LETM1 domain containing 1	se	NA	-0.12	0.011
se@12:57011316:57023909:-|12:57009391:57023909:-.1	chr12:57009291-57024009	ENSG00000076108	BAZ2A	bromodomain adjacent to zinc finger domain, 2A	se	NA	-0.135	0.028
se@12:57584792:57585103:+|12:57584792:57586628:+.1	chr12:57584692-57586728	ENSG00000123384	LRP1	low density lipoprotein receptor-related protein 1	se	FALSE	-0.135	0.018
se@12:58112965:58113882:+|12:58112965:58114189:+.1	chr12:58112865-58114289	ENSG00000135506	OS9	osteosarcoma amplified 9, endoplasmic reticulum lectin	se	NA	0.135	4.1e-05
se@12:7252622:7254494:-|12:7252356:7254494:-.1	chr12:7252256-7254594	ENSG00000139178	C1RL	complement component 1, r subcomponent-like	se	NA	-0.12	0.0014
se@12:76468019:76478347:-|12:76454059:76478347:-.1	chr12:76453959-76478447	ENSG00000187109	NAP1L1	nucleosome assembly protein 1-like 1	se	NA	-0.115	0.027
se@12:80200077:80201006:-|12:80199548:80201006:-.1	chr12:80199448-80201106	ENSG00000058272	PPP1R12A	protein phosphatase 1, regulatory subunit 12A	se	NA	-0.13	0.01
se@12:80200113:80201006:-|12:80192364:80201006:-.1	chr12:80192264-80201106	ENSG00000058272	PPP1R12A	protein phosphatase 1, regulatory subunit 12A	se	NA	-0.165	0.0029
se@12:80200113:80201006:-|12:80199548:80201006:-.1	chr12:80199448-80201106	ENSG00000058272	PPP1R12A	protein phosphatase 1, regulatory subunit 12A	se	NA	-0.19	0.0024
se@12:88429515:88433925:+|12:88429515:88436602:+.1	chr12:88429415-88436702	ENSG00000133641	C12orf29	chromosome 12 open reading frame 29	se	FALSE	0.115	0.00014
se@12:88909394:88910111:-|12:88900914:88910111:-.1	chr12:88900814-88910211	ENSG00000049130	KITLG	KIT ligand	se	NA	-0.115	0.014
se@13:25876018:25881944:+|13:25876018:25887021:+.1	chr13:25875918-25887121	ENSG00000139496	NUPL1	nucleoporin like 1	se	FALSE	-0.175	0.017
se@13:39613848:39616242:+|13:39613848:39618227:+.1	chr13:39613748-39618327	ENSG00000188811	NHLRC3	NHL repeat containing 3	se	NA	-0.14	7.6e-05
se@13:50237313:50265390:-|13:50235344:50265390:-.1	chr13:50235244-50265490	ENSG00000123179	EBPL	emopamil binding protein-like	se	TRUE	-0.115	0.00026
se@13:76378677:76383290:+|13:76378677:76391297:+.1	chr13:76378577-76391397	ENSG00000136153	LMO7	LIM domain 7	se	NA	-0.195	0.011
se@13:78165595:78167649:+|13:78165595:78171680:+.1	chr13:78165495-78171780	ENSG00000136155	SCEL	sciellin	se	NA	0.13	0.0009
se@13:99478194:99479084:-|13:99476758:99479084:-.1	chr13:99476658-99479184	ENSG00000088387	DOCK9	dedicator of cytokinesis 9	se	NA	-0.115	0.00042
se@13:99890808:99896769:+|13:99890808:99966351:+.1	chr13:99890708-99966451	ENSG00000134882	UBAC2	UBA domain containing 2	se	TRUE	-0.11	0.02
se@14:100762034:100765179:-|14:100759714:100765179:-.1	chr14:100759614-100765279	ENSG00000197119	SLC25A29	solute carrier family 25 (mitochondrial carnitine/acylcarnitine carrier), member 29	se	TRUE	-0.13	0.00017
se@14:102975189:102975866:-|14:102974886:102975866:-.1	chr14:102974786-102975966	ENSG00000156381	ANKRD9	ankyrin repeat domain 9	se	NA	-0.125	0.013
se@14:104145855:104151323:+|14:104145855:104151975:+.1	chr14:104145755-104152075	ENSG00000126214	KLC1	kinesin light chain 1	se	NA	0.155	0.0069
se@14:24036559:24036660:-|14:24035628:24036660:-.1	chr14:24035528-24036760	ENSG00000213983	AP1G2	adaptor-related protein complex 1, gamma 2 subunit	se	TRUE	0.145	0.018
se@14:35255427:35261981:-|14:35255207:35261981:-.1	chr14:35255107-35262081	ENSG00000198604	BAZ1A	bromodomain adjacent to zinc finger domain, 1A	se	NA	0.11	0.0027
se@14:36946303:36960406:-|14:36944078:36960406:-.1	chr14:36943978-36960506	ENSG00000229415	SFTA3	surfactant associated 3	se	NA	0.115	1.7e-05
se@14:55494189:55498581:+|14:55494189:55509670:+.1	chr14:55494089-55509770	ENSG00000180008	SOCS4	suppressor of cytokine signaling 4	se	NA	0.1	0.021
se@14:58760644:58764673:-|14:58758425:58764673:-.1	chr14:58758325-58764773	ENSG00000139971	C14orf37	chromosome 14 open reading frame 37	se	NA	0.14	0.0018
se@14:58762529:58764673:-|14:58758425:58764673:-.1	chr14:58758325-58764773	ENSG00000139971	C14orf37	chromosome 14 open reading frame 37	se	NA	0.14	0.016
se@14:60559137:60574304:+|14:60559137:60581418:+.1	chr14:60559037-60581518	ENSG00000126773	PCNXL4	pecanex-like 4 (Drosophila)	se	NA	-0.125	0.011
se@14:61346553:61434947:+|14:61346553:61435277:+.1	chr14:61346453-61435377	ENSG00000020426	MNAT1	menage a trois homolog 1, cyclin H assembly factor (Xenopus laevis)	se	TRUE	-0.155	0.00036
se@14:69922583:69925080:+|14:69922583:69928414:+.1	chr14:69922483-69928514	ENSG00000029364	SLC39A9	solute carrier family 39 (zinc transporter), member 9	se	TRUE	-0.14	0.029
se@14:74343871:74345799:+|14:74343871:74346758:+.1	chr14:74343771-74346858	ENSG00000140043	PTGR2	prostaglandin reductase 2	se	NA	-0.14	3.6e-05
se@15:43427847:43430772:+|15:43427847:43438691:+.1	chr15:43427747-43438791	ENSG00000137842	TMEM62	transmembrane protein 62	se	FALSE	-0.14	0.012
se@15:43461875:43470805:+|15:43461875:43473379:+.1	chr15:43461775-43473479	ENSG00000137842	TMEM62	transmembrane protein 62	se	NA	-0.165	2e-06
se@15:48444481:48445989:-|15:48444139:48445989:-.1	chr15:48444039-48446089	ENSG00000104177	MYEF2	myelin expression factor 2	se	NA	-0.175	0.0019
se@15:59960337:59961091:-|15:59956319:59961091:-.1	chr15:59956219-59961191	ENSG00000140299	BNIP2	BCL2/adenovirus E1B 19kDa interacting protein 2	se	NA	0.1	0.0069
se@15:65899780:65903436:-|15:65897574:65903436:-.1	chr15:65897474-65903536	ENSG00000138614	VWA9	von Willebrand factor A domain containing 9	se	NA	-0.14	0.017
se@15:66787757:66789828:-|15:66786890:66789828:-.1	chr15:66786790-66789928	ENSG00000174446	SNAPC5	small nuclear RNA activating complex, polypeptide 5, 19kDa	se	TRUE	-0.105	0.0018
se@15:75182430:75182897:+|15:75182430:75183720:+.1	chr15:75182330-75183820	ENSG00000178802	MPI	mannose phosphate isomerase	se	NA	-0.105	0.014
se@16:15044112:15044609:+|16:15044112:15045472:+.1	chr16:15044012-15045572	ENSG00000183426	NPIP	nuclear pore complex interacting protein	se	NA	-0.375	0.00035
se@16:29458347:29465337:-|16:29455820:29465337:-.1	chr16:29455720-29465437	ENSG00000261740	BOLA2B	BolA-like protein 2	se	NA	0.13	0.012
se@16:3019841:3021158:+|16:3019841:3021516:+.1	chr16:3019741-3021616	ENSG00000162073	PAQR4	progestin and adipoQ receptor family member IV	se	NA	-0.14	0.012
se@16:30662127:30662314:+|16:30662127:30662917:+.1	chr16:30662027-30663017	ENSG00000156858	PRR14	proline rich 14	se	NA	0.11	0.0071
se@16:3334205:3338454:+|16:3334205:3339393:+.1	chr16:3334105-3339493	ENSG00000006194	ZNF263	zinc finger protein 263	se	NA	0.145	9.4e-07
se@16:3693037:3701318:+|16:3693037:3704962:+.1	chr16:3692937-3705062	ENSG00000213918	DNASE1	deoxyribonuclease I	se	NA	-0.17	0.0019
se@16:4776781:4779981:-|16:4774832:4779981:-.1	chr16:4774732-4780081	ENSG00000168096	ANKS3	ankyrin repeat and sterile alpha motif domain containing 3	se	TRUE	0.13	0.0016
se@16:4777178:4779981:-|16:4776781:4779981:-.1	chr16:4776681-4780081	ENSG00000168096	ANKS3	ankyrin repeat and sterile alpha motif domain containing 3	se	FALSE	-0.12	0.00029
se@16:66860683:66864750:-|16:66860486:66864750:-.1	chr16:66860386-66864850	ENSG00000159593	NAE1	NEDD8 activating enzyme E1 subunit 1	se	FALSE	-0.11	0.023
se@16:67201125:67201206:+|16:67201125:67201378:+.1	chr16:67201025-67201478	ENSG00000102878	HSF4	heat shock transcription factor 4	se	TRUE	0.215	1.4e-05
se@16:67572453:67572575:+|16:67572453:67572893:+.1	chr16:67572353-67572993	ENSG00000039523	FAM65A	family with sequence similarity 65, member A	se	NA	-0.1	0.019
se@16:684956:685281:-|16:684797:685281:-.1	chr16:684697-685381	ENSG00000130731	C16orf13	chromosome 16 open reading frame 13	se	NA	0.12	0.0019
se@16:685340:686094:-|16:684956:686094:-.1	chr16:684856-686194	ENSG00000130731	C16orf13	chromosome 16 open reading frame 13	se	NA	0.13	0.013
se@16:69728142:69729039:+|16:69728142:69730263:+.1	chr16:69728042-69730363	ENSG00000102908	NFAT5	nuclear factor of activated T-cells 5, tonicity-responsive	se	NA	-0.135	0.017
se@16:70182456:70187294:+|16:70182456:70190378:+.1	chr16:70182356-70190478	ENSG00000090857	PDPR	pyruvate dehydrogenase phosphatase regulatory subunit	se	NA	-0.1	0.032
se@16:75652596:75654164:-|16:75651170:75654164:-.1	chr16:75651070-75654264	ENSG00000065457	ADAT1	adenosine deaminase, tRNA-specific 1	se	NA	-0.12	0.0002
se@16:88071617:88098873:+|16:88071617:88105675:+.1	chr16:88071517-88105775	ENSG00000172530	BANP	BTG3 associated nuclear protein	se	NA	0.15	0.012
se@17:16054930:16055260:-|17:16052831:16055260:-.1	chr17:16052731-16055360	ENSG00000141027	NCOR1	nuclear receptor corepressor 1	se	NA	0.11	0.0023
se@17:16252647:16253245:-|17:16251999:16253245:-.1	chr17:16251899-16253345	ENSG00000166582	CENPV	centromere protein V	se	TRUE	-0.105	0.00071
se@17:16691449:16695141:+|17:16691449:16699357:+.1	chr17:16691349-16699457	ENSG00000170160	CCDC144A	coiled-coil domain containing 144A	se	NA	-0.105	0.05
se@17:17083402:17083921:+|17:17083402:17088137:+.1	chr17:17083302-17088237	ENSG00000133030	MPRIP	myosin phosphatase Rho interacting protein	se	NA	0.125	0.0025
se@17:21114540:21117404:-|17:21102153:21117404:-.1	chr17:21102053-21117504	ENSG00000178307	TMEM11	transmembrane protein 11	se	TRUE	-0.12	9.8e-05
se@17:25621461:25628814:+|17:25621461:25631806:+.1	chr17:25621361-25631906	ENSG00000109046	WSB1	WD repeat and SOCS box containing 1	se	TRUE	-0.14	0.035
se@17:26903038:26903819:-|17:26902562:26903819:-.1	chr17:26902462-26903919	ENSG00000109107	ALDOC	aldolase C, fructose-bisphosphate	se	NA	-0.105	5.3e-07
se@17:30535328:30538135:+|17:30535328:30551635:+.1	chr17:30535228-30551735	ENSG00000126858	RHOT1	ras homolog family member T1	se	NA	0.105	6.5e-06
se@17:3626677:3626982:-|17:3623696:3626982:-.1	chr17:3623596-3627082	ENSG00000083457	ITGAE	integrin, alpha E (antigen CD103, human mucosal lymphocyte antigen 1; alpha polypeptide)	se	NA	0.145	0.019
se@17:38063240:38065211:-|17:38062524:38065211:-.1	chr17:38062424-38065311	ENSG00000073605	GSDMB	gasdermin B	se	NA	-0.15	0.0032
se@17:38063240:38066009:-|17:38062524:38066009:-.1	chr17:38062424-38066109	ENSG00000073605	GSDMB	gasdermin B	se	NA	-0.16	0.0011
se@17:38191225:38191370:-|17:38189709:38191370:-.1	chr17:38189609-38191470	ENSG00000008838	MED24	mediator complex subunit 24	se	NA	0.14	7.1e-06
se@17:40739882:40744074:-|17:40738909:40744074:-.1	chr17:40738809-40744174	ENSG00000141699	FAM134C	family with sequence similarity 134, member C	se	NA	-0.13	0.00041
se@17:45249430:45258928:-|17:45247408:45258928:-.1	chr17:45247308-45259028	ENSG00000004897	CDC27	cell division cycle 27	se	FALSE	-0.145	0.0046
se@17:45600429:45608756:+|17:45600429:45623275:+.1	chr17:45600329-45623375	ENSG00000141279	NPEPPS	aminopeptidase puromycin sensitive	se	FALSE	-0.12	0.029
se@17:45600429:45608783:+|17:45600429:45623275:+.1	chr17:45600329-45623375	ENSG00000141279	NPEPPS	aminopeptidase puromycin sensitive	se	NA	-0.1	0.021
se@17:4614039:4618308:+|17:4614039:4619268:+.1	chr17:4613939-4619368	ENSG00000141480	ARRB2	arrestin, beta 2	se	FALSE	-0.1	0.0045
se@17:48538233:48538603:+|17:48538233:48538994:+.1	chr17:48538133-48539094	ENSG00000167107	ACSF2	acyl-CoA synthetase family member 2	se	TRUE	-0.125	0.00049
se@17:5326149:5331391:+|17:5326149:5335862:+.1	chr17:5326049-5335962	ENSG00000129197	RPAIN	RPA interacting protein	se	TRUE	-0.125	0.0068
se@17:59457932:59465979:+|17:59457932:59469338:+.1	chr17:59457832-59469438	ENSG00000141376	BCAS3	breast carcinoma amplified sequence 3	se	NA	0.135	0.00026
se@17:61804055:61805694:-|17:61791468:61805694:-.1	chr17:61791368-61805794	ENSG00000266173	STRADA	STE20-related kinase adaptor alpha	se	NA	-0.135	0.00083
se@17:63533181:63533442:-|17:63532671:63533442:-.1	chr17:63532571-63533542	ENSG00000168646	AXIN2	axin 2	se	NA	0.12	0.0041
se@17:65871860:65882244:+|17:65871860:65887960:+.1	chr17:65871760-65888060	ENSG00000171634	BPTF	bromodomain PHD finger transcription factor	se	NA	-0.12	0.00018
se@17:65955991:65959449:+|17:65955991:65960328:+.1	chr17:65955891-65960428	ENSG00000171634	BPTF	bromodomain PHD finger transcription factor	se	NA	-0.105	0.00082
se@17:71233134:71238383:+|17:71233134:71239035:+.1	chr17:71233034-71239135	ENSG00000141219	C17orf80	chromosome 17 open reading frame 80	se	NA	-0.15	0.00028
se@17:74553939:74555027:+|17:74553939:74557370:+.1	chr17:74553839-74557470	ENSG00000163597	SNHG16	small nucleolar RNA host gene 16 (non-protein coding)	se	TRUE	-0.13	0.0002
se@17:76996352:77005746:-|17:76994368:77005746:-.1	chr17:76994268-77005846	ENSG00000171302	CANT1	calcium activated nucleotidase 1	se	NA	0.115	0.00085
se@17:79082309:79084714:+|17:79082309:79089570:+.1	chr17:79082209-79089670	ENSG00000175866	BAIAP2	BAI1-associated protein 2	se	TRUE	0.14	0.0011
se@17:79650156:79650566:-|17:79649179:79650566:-.1	chr17:79649079-79650666	ENSG00000214087	ARL16	ADP-ribosylation factor-like 16	se	NA	-0.11	0.0066
se@18:13682104:13726328:-|18:13666712:13726328:-.1	chr18:13666612-13726428	ENSG00000177150	FAM210A	family with sequence similarity 210, member A	se	NA	-0.14	0.0095
se@18:13754146:13759941:+|18:13754146:13762038:+.1	chr18:13754046-13762138	ENSG00000101654	RNMT	RNA (guanine-7-) methyltransferase	se	TRUE	-0.12	0.0045
se@18:33706979:33709077:-|18:33704663:33709077:-.1	chr18:33704563-33709177	ENSG00000141424	SLC39A6	solute carrier family 39 (zinc transporter), member 6	se	NA	-0.17	0.019
se@19:10655806:10659580:+|19:10655806:10662573:+.1	chr19:10655706-10662673	ENSG00000130734	ATG4D	autophagy related 4D, cysteine peptidase	se	NA	-0.125	0.003
se@19:1358463:1358587:+|19:1358463:1360135:+.1	chr19:1358363-1360235	ENSG00000160953	MUM1	melanoma associated antigen (mutated) 1	se	NA	0.125	0.00011
se@19:34706566:34710296:+|19:34706566:34710611:+.1	chr19:34706466-34710711	ENSG00000257103	LSM14A	LSM14A, SCD6 homolog A (S. cerevisiae)	se	NA	-0.16	2.9e-06
se@19:34712643:34717313:+|19:34712643:34718270:+.1	chr19:34712543-34718370	ENSG00000257103	LSM14A	LSM14A, SCD6 homolog A (S. cerevisiae)	se	NA	0.13	6.5e-06
se@19:34919475:34921481:+|19:34919475:34922766:+.1	chr19:34919375-34922866	ENSG00000126261	UBA2	ubiquitin-like modifier activating enzyme 2	se	NA	-0.22	0.00048
se@19:35988583:35989500:-|19:35988440:35989500:-.1	chr19:35988340-35989600	ENSG00000161249	DMKN	dermokine	se	NA	-0.125	0.0017
se@19:35988583:35989618:-|19:35988440:35989618:-.1	chr19:35988340-35989718	ENSG00000161249	DMKN	dermokine	se	NA	-0.155	0.0013
se@19:45582635:45583165:+|19:45582635:45593365:+.1	chr19:45582535-45593465	ENSG00000142252	GEMIN7	gem (nuclear organelle) associated protein 7	se	NA	-0.17	2.7e-05
se@19:45668452:45681393:-|19:45668228:45681393:-.1	chr19:45668128-45681493	ENSG00000007255	TRAPPC6A	trafficking protein particle complex 6A	se	NA	-0.115	0.00048
se@19:45996636:45997424:-|19:45992811:45997424:-.1	chr19:45992711-45997524	ENSG00000125744	RTN2	reticulon 2	se	NA	0.15	0.044
se@19:49131534:49131938:+|19:49131534:49133691:+.1	chr19:49131434-49133791	ENSG00000063176	SPHK2	sphingosine kinase 2	se	NA	-0.115	0.00022
se@19:49859227:49860509:-|19:49858676:49860509:-.1	chr19:49858576-49860609	ENSG00000074219	TEAD2	TEA domain family member 2	se	NA	-0.1	0.0043
se@19:5218809:5219321:-|19:5218543:5219321:-.1	chr19:5218443-5219421	ENSG00000105426	PTPRS	protein tyrosine phosphatase, receptor type, S	se	NA	-0.13	0.00016
se@19:55489191:55492994:+|19:55489191:55493530:+.1	chr19:55489091-55493630	ENSG00000022556	NLRP2	NLR family, pyrin domain containing 2	se	NA	-0.13	0.015
se@19:805187:805492:+|19:805187:806408:+.1	chr19:805087-806508	ENSG00000011304	PTBP1	polypyrimidine tract binding protein 1	se	NA	-0.145	2.6e-05
se@19:9732321:9737460:+|19:9732321:9742904:+.1	chr19:9732221-9743004	ENSG00000267106	CTD-3116E22.4	uncharacterized protein LOC284385	se	FALSE	0.105	0.017
se@2:112656373:112686697:+|2:112656373:112702537:+.1	chr2:112656273-112702637	ENSG00000153208	MERTK	c-mer proto-oncogene tyrosine kinase	se	FALSE	-0.125	0.034
se@2:112824644:112832489:+|2:112824644:112834769:+.1	chr2:112824544-112834869	ENSG00000153214	TMEM87B	transmembrane protein 87B	se	NA	-0.195	0.0012
se@2:127815177:127816587:-|2:127809938:127816587:-.1	chr2:127809838-127816687	ENSG00000136717	BIN1	bridging integrator 1	se	NA	0.14	0.013
se@2:136362586:136374238:+|2:136362586:136379064:+.1	chr2:136362486-136379164	ENSG00000048991	R3HDM1	R3H domain containing 1	se	NA	0.165	8.5e-05
se@2:157187303:157188992:-|2:157186700:157188992:-.1	chr2:157186600-157189092	ENSG00000153234	NR4A2	nuclear receptor subfamily 4, group A, member 2	se	NA	-0.12	0.04
se@2:161052931:161056514:-|2:161052126:161056514:-.1	chr2:161052026-161056614	ENSG00000115221	ITGB6	integrin, beta 6	se	FALSE	-0.1	0.00044
se@2:161055769:161056514:-|2:161052931:161056514:-.1	chr2:161052831-161056614	ENSG00000115221	ITGB6	integrin, beta 6	se	FALSE	-0.12	0.011
se@2:172248707:172271113:-|2:172217023:172271113:-.1	chr2:172216923-172271213	ENSG00000123600	METTL8	methyltransferase like 8	se	TRUE	-0.215	0.0066
se@2:172248707:172290393:-|2:172217023:172290393:-.1	chr2:172216923-172290493	ENSG00000123600	METTL8	methyltransferase like 8	se	NA	-0.21	0.0012
se@2:175979596:175982718:-|2:175976382:175982718:-.1	chr2:175976282-175982818	ENSG00000115966	ATF2	activating transcription factor 2	se	TRUE	-0.12	0.04
se@2:204341879:204354307:-|2:204335036:204354307:-.1	chr2:204334936-204354407	ENSG00000173166	RAPH1	Ras association (RalGDS/AF-6) and pleckstrin homology domains 1	se	NA	0.19	0.0055
se@2:220081554:220082392:-|2:220081187:220082392:-.1	chr2:220081087-220082492	ENSG00000115657	ABCB6	ATP-binding cassette, sub-family B (MDR/TAP), member 6	se	FALSE	-0.155	0.00079
se@2:220104816:220104913:-|2:220104555:220104913:-.1	chr2:220104455-220105013	ENSG00000163521	GLB1L	galactosidase, beta 1-like	se	FALSE	-0.125	0.00082
se@2:223511689:223513459:-|2:223507724:223513459:-.1	chr2:223507624-223513559	ENSG00000116120	FARSB	phenylalanyl-tRNA synthetase, beta subunit	se	TRUE	0.135	0.00015
se@2:223511715:223513459:-|2:223507724:223513459:-.1	chr2:223507624-223513559	ENSG00000116120	FARSB	phenylalanyl-tRNA synthetase, beta subunit	se	TRUE	0.15	0.00082
se@2:223511736:223513459:-|2:223507724:223513459:-.1	chr2:223507624-223513559	ENSG00000116120	FARSB	phenylalanyl-tRNA synthetase, beta subunit	se	TRUE	0.11	0.00019
se@2:224920:229966:-|2:219001:229966:-.1	chr2:218901-230066	ENSG00000035115	SH3YL1	SH3 domain containing, Ysc84-like 1 (S. cerevisiae)	se	NA	0.14	4e-05
se@2:228205096:228207461:+|2:228205096:228211942:+.1	chr2:228204996-228212042	ENSG00000168958	MFF	mitochondrial fission factor	se	NA	0.14	3.9e-08
se@2:228205096:228207461:+|2:228205096:228220393:+.1	chr2:228204996-228220493	ENSG00000168958	MFF	mitochondrial fission factor	se	NA	0.1	4.1e-08
se@2:228205096:228211942:+|2:228205096:228220393:+.1	chr2:228204996-228220493	ENSG00000168958	MFF	mitochondrial fission factor	se	NA	0.115	0.041
se@2:233431924:233438973:+|2:233431924:233445614:+.1	chr2:233431824-233445714	ENSG00000135930	EIF4E2	eukaryotic translation initiation factor 4E family member 2	se	NA	0.13	0.004
se@2:233438846:233438973:+|2:233438846:233445614:+.1	chr2:233438746-233445714	ENSG00000135930	EIF4E2	eukaryotic translation initiation factor 4E family member 2	se	NA	0.105	0.029
se@2:236817550:236839409:+|2:236817550:236877106:+.1	chr2:236817450-236877206	ENSG00000157985	AGAP1	ArfGAP with GTPase domain, ankyrin repeat and PH domain 1	se	NA	-0.17	0.00047
se@2:241451418:241452219:-|2:241447108:241452219:-.1	chr2:241447008-241452319	ENSG00000144504	ANKMY1	ankyrin repeat and MYND domain containing 1	se	NA	0.225	0.0028
se@2:24358057:24360779:+|2:24358057:24362240:+.1	chr2:24357957-24362340	ENSG00000219626	FAM228B	family with sequence similarity 228, member B	se	NA	-0.16	0.0036
se@2:32419052:32422413:+|2:32419052:32422776:+.1	chr2:32418952-32422876	ENSG00000152683	SLC30A6	solute carrier family 30 (zinc transporter), member 6	se	FALSE	0.13	4.2e-05
se@2:3606588:3606994:+|2:3606588:3608907:+.1	chr2:3606488-3609007	ENSG00000234171	AC108488.3	NA	se	NA	0.16	8.6e-06
se@2:3606588:3607038:+|2:3606588:3608907:+.1	chr2:3606488-3609007	ENSG00000234171	AC108488.3	NA	se	NA	0.185	0.00025
se@2:39535146:39536602:-|2:39526942:39536602:-.1	chr2:39526842-39536702	ENSG00000011566	MAP4K3	mitogen-activated protein kinase kinase kinase kinase 3	se	NA	0.115	0.016
se@2:39998780:40006254:-|2:39997259:40006254:-.1	chr2:39997159-40006354	ENSG00000138050	THUMPD2	THUMP domain containing 2	se	NA	-0.15	0.011
se@2:43783694:43787373:-|2:43779478:43787373:-.1	chr2:43779378-43787473	ENSG00000115970	THADA	thyroid adenoma associated	se	FALSE	-0.11	0.0003
se@2:47135108:47142862:-|2:47132733:47142862:-.1	chr2:47132633-47142962	ENSG00000180398	MCFD2	multiple coagulation factor deficiency 2	se	NA	-0.16	0.00015
se@2:47135108:47168711:-|2:47132733:47168711:-.1	chr2:47132633-47168811	ENSG00000180398	MCFD2	multiple coagulation factor deficiency 2	se	NA	-0.215	0.0013
se@2:47136316:47142862:-|2:47135108:47142862:-.1	chr2:47135008-47142962	ENSG00000180398	MCFD2	multiple coagulation factor deficiency 2	se	NA	-0.125	0.0069
se@2:47136316:47143120:-|2:47135108:47143120:-.1	chr2:47135008-47143220	ENSG00000180398	MCFD2	multiple coagulation factor deficiency 2	se	NA	-0.22	0.00057
se@2:47136316:47168711:-|2:47135108:47168711:-.1	chr2:47135008-47168811	ENSG00000180398	MCFD2	multiple coagulation factor deficiency 2	se	NA	-0.19	0.00053
se@2:74369487:74372316:-|2:74362785:74372316:-.1	chr2:74362685-74372416	ENSG00000163170	BOLA3	bolA homolog 3 (E. coli)	se	NA	-0.155	1.6e-06
se@2:75749613:75788383:-|2:75745334:75788383:-.1	chr2:75745234-75788483	ENSG00000115363	EVA1A	eva-1 homolog A (C. elegans)	se	NA	0.105	0.0071
se@2:86669356:86676930:+|2:86669356:86678226:+.1	chr2:86669256-86678326	ENSG00000115548	KDM3A	lysine (K)-specific demethylase 3A	se	NA	-0.13	0.039
se@2:96068740:96071025:+|2:96068740:96071301:+.1	chr2:96068640-96071401	ENSG00000115042	FAHD2A	fumarylacetoacetate hydrolase domain containing 2A	se	NA	0.13	0.0046
se@2:97285499:97297049:-|2:97285281:97297049:-.1	chr2:97285181-97297149	ENSG00000114982	KANSL3	KAT8 regulatory NSL complex subunit 3	se	FALSE	-0.17	0.0021
se@2:97297280:97302658:-|2:97285499:97302658:-.1	chr2:97285399-97302758	ENSG00000114982	KANSL3	KAT8 regulatory NSL complex subunit 3	se	TRUE	-0.165	0.017
se@2:98411578:98412681:-|2:98410016:98412681:-.1	chr2:98409916-98412781	ENSG00000075568	TMEM131	transmembrane protein 131	se	NA	-0.13	3.8e-05
se@20:10015981:10016227:+|20:10015981:10018906:+.1	chr20:10015881-10019006	ENSG00000132623	ANKEF1	ankyrin repeat and EF-hand domain containing 1	se	NA	0.11	0.0032
se@20:21112800:21117031:+|20:21112800:21126206:+.1	chr20:21112700-21126306	ENSG00000088970	PLK1S1	NA	se	FALSE	-0.105	0.0015
se@20:44463755:44469087:+|20:44463755:44469278:+.1	chr20:44463655-44469378	ENSG00000124104	SNX21	sorting nexin family member 21	se	NA	-0.17	5.2e-06
se@20:47897107:47897440:+|20:47897107:47905582:+.1	chr20:47897007-47905682	ENSG00000177410	ZFAS1	NA	se	NA	-0.125	0.0013
se@20:55967833:55968335:+|20:55967833:55982599:+.1	chr20:55967733-55982699	ENSG00000132819	RBM38	RNA binding motif protein 38	se	NA	-0.1	0.00028
se@20:57470739:57473996:+|20:57470739:57478583:+.1	chr20:57470639-57478683	ENSG00000087460	GNAS	GNAS complex locus	se	NA	0.12	0.00024
se@20:57470739:57473996:+|20:57470739:57478586:+.1	chr20:57470639-57478686	ENSG00000087460	GNAS	GNAS complex locus	se	NA	0.15	0.00031
se@20:58443623:58443890:-|20:58442902:58443890:-.1	chr20:58442802-58443990	ENSG00000196074	SYCP2	synaptonemal complex protein 2	se	NA	0.105	0.043
se@20:58574718:58576398:+|20:58574718:58577868:+.1	chr20:58574618-58577968	ENSG00000124215	CDH26	cadherin 26	se	TRUE	-0.185	0.0021
se@21:15588603:15591874:+|21:15588603:15593418:+.1	chr21:15588503-15593518	ENSG00000185272	RBM11	RNA binding motif protein 11	se	NA	-0.11	0.0096
se@21:15588603:15591884:+|21:15588603:15593418:+.1	chr21:15588503-15593518	ENSG00000185272	RBM11	RNA binding motif protein 11	se	FALSE	-0.145	0.0085
se@21:18919511:18924067:+|21:18919511:18937746:+.1	chr21:18919411-18937846	ENSG00000154639	CXADR	coxsackie virus and adenovirus receptor	se	NA	-0.22	0.0016
se@21:18924271:18931294:+|21:18924271:18937746:+.1	chr21:18924171-18937846	ENSG00000154639	CXADR	coxsackie virus and adenovirus receptor	se	NA	-0.15	0.0015
se@21:18931449:18933656:+|21:18931449:18937746:+.1	chr21:18931349-18937846	ENSG00000154639	CXADR	coxsackie virus and adenovirus receptor	se	NA	-0.15	0.004
se@21:30380444:30380716:-|21:30378972:30380716:-.1	chr21:30378872-30380816	ENSG00000156253	RWDD2B	RWD domain containing 2B	se	TRUE	-0.11	1.2e-05
se@21:34955972:34956896:-|21:34954552:34956896:-.1	chr21:34954452-34956996	ENSG00000159147	DONSON	downstream neighbor of SON	se	FALSE	-0.315	4.2e-05
se@21:34959908:34960627:-|21:34958487:34960627:-.1	chr21:34958387-34960727	ENSG00000159147	DONSON	downstream neighbor of SON	se	NA	-0.13	0.028
se@21:37429775:37431114:-|21:37429502:37431114:-.1	chr21:37429402-37431214	ENSG00000185917	SETD4	SET domain containing 4	se	TRUE	0.185	5.8e-06
se@21:44521542:44524425:-|21:44515853:44524425:-.1	chr21:44515753-44524525	ENSG00000160201	U2AF1	U2 small nuclear RNA auxiliary factor 1	se	FALSE	-0.16	0.00015
se@21:45846619:45846893:+|21:45846619:45855014:+.1	chr21:45846519-45855114	ENSG00000142185	TRPM2	transient receptor potential cation channel, subfamily M, member 2	se	NA	0.11	0.019
se@21:46340877:46348569:-|21:46330700:46348569:-.1	chr21:46330600-46348669	ENSG00000160255	ITGB2	integrin, beta 2 (complement component 3 receptor 3 and 4 subunit)	se	NA	-0.165	0.02
se@22:19431913:19434901:-|22:19429217:19434901:-.1	chr22:19429117-19435001	ENSG00000242259	C22orf39	chromosome 22 open reading frame 39	se	TRUE	0.1	0.024
se@22:20922918:20929400:+|22:20922918:20936898:+.1	chr22:20922818-20936998	ENSG00000099917	MED15	mediator complex subunit 15	se	NA	0.125	9.4e-05
se@22:24940051:24942882:-|22:24939068:24942882:-.1	chr22:24938968-24942982	ENSG00000138867	GUCD1	guanylyl cyclase domain containing 1	se	NA	-0.125	0.032
se@22:29946832:29949437:-|22:29945147:29949437:-.1	chr22:29945047-29949537	ENSG00000100296	THOC5	THO complex 5	se	NA	-0.135	0.02
se@22:29946832:29949660:-|22:29945147:29949660:-.1	chr22:29945047-29949760	ENSG00000100296	THOC5	THO complex 5	se	NA	-0.1	0.021
se@22:30416873:30418018:+|22:30416873:30418598:+.1	chr22:30416773-30418698	ENSG00000100330	MTMR3	myotubularin related protein 3	se	NA	0.105	3.8e-05
se@22:31924849:31927044:+|22:31924849:31942847:+.1	chr22:31924749-31942947	ENSG00000198089	SFI1	Sfi1 homolog, spindle assembly associated (yeast)	se	NA	0.11	0.0069
se@22:38691453:38694791:-|22:38690540:38694791:-.1	chr22:38690440-38694891	ENSG00000213923	CSNK1E	casein kinase 1, epsilon	se	TRUE	0.205	4.4e-05
se@3:107768498:107769425:-|3:107766139:107769425:-.1	chr3:107766039-107769525	ENSG00000196776	CD47	CD47 molecule	se	NA	-0.12	0.00054
se@3:121547479:121547708:-|3:121545027:121547708:-.1	chr3:121544927-121547808	ENSG00000173226	IQCB1	IQ motif containing B1	se	FALSE	-0.11	0.028
se@3:132418294:132418762:-|3:132416206:132418762:-.1	chr3:132416106-132418862	ENSG00000113971	NPHP3	nephronophthisis 3 (adolescent)	se	FALSE	0.115	0.008
se@3:142169444:142171970:-|3:142168444:142171970:-.1	chr3:142168344-142172070	ENSG00000175054	ATR	ataxia telangiectasia and Rad3 related	se	TRUE	0.24	2.5e-08
se@3:145795711:145796903:-|3:145794682:145796903:-.1	chr3:145794582-145797003	ENSG00000152952	PLOD2	procollagen-lysine, 2-oxoglutarate 5-dioxygenase 2	se	NA	-0.145	0.0025
se@3:15282360:15282960:+|3:15282360:15283685:+.1	chr3:15282260-15283785	ENSG00000131375	CAPN7	calpain 7	se	FALSE	-0.17	0.0019
se@3:15471514:15473594:+|3:15471514:15475855:+.1	chr3:15471414-15475955	ENSG00000144597	EAF1	ELL associated factor 1	se	FALSE	-0.145	0.0054
se@3:16305732:16306276:-|3:16302336:16306276:-.1	chr3:16302236-16306376	ENSG00000154813	DPH3	DPH3, KTI11 homolog (S. cerevisiae)	se	NA	-0.18	0.0002
se@3:16305736:16306276:-|3:16302336:16306276:-.1	chr3:16302236-16306376	ENSG00000154813	DPH3	DPH3, KTI11 homolog (S. cerevisiae)	se	NA	-0.215	0.00019
se@3:176782810:176816254:-|3:176771706:176816254:-.1	chr3:176771606-176816354	ENSG00000177565	TBL1XR1	transducin (beta)-like 1 X-linked receptor 1	se	NA	-0.155	0.024
se@3:180688146:180693101:+|3:180688146:180693910:+.1	chr3:180688046-180694010	ENSG00000114416	FXR1	fragile X mental retardation, autosomal homolog 1	se	NA	0.12	0.00014
se@3:180704810:180705811:-|3:180703784:180705811:-.1	chr3:180703684-180705911	ENSG00000205981	DNAJC19	DnaJ (Hsp40) homolog, subfamily C, member 19	se	FALSE	0.105	0.004
se@3:183898039:183898433:+|3:183898039:183898637:+.1	chr3:183897939-183898737	ENSG00000161203	AP2M1	adaptor-related protein complex 2, mu 1 subunit	se	NA	-0.125	2.6e-05
se@3:196803553:196807922:-|3:196802741:196807922:-.1	chr3:196802641-196808022	ENSG00000075711	DLG1	discs, large homolog 1 (Drosophila)	se	TRUE	0.12	0.0078
se@3:196803556:196807922:-|3:196802741:196807922:-.1	chr3:196802641-196808022	ENSG00000075711	DLG1	discs, large homolog 1 (Drosophila)	se	TRUE	0.14	0.0034
se@3:33114205:33138503:-|3:33107049:33138503:-.1	chr3:33106949-33138603	ENSG00000170266	GLB1	galactosidase, beta 1	se	FALSE	-0.185	0.006
se@3:37133029:37136283:-|3:37125297:37136283:-.1	chr3:37125197-37136383	ENSG00000093167	LRRFIP2	leucine rich repeat (in FLII) interacting protein 2	se	NA	0.15	0.0082
se@3:44399368:44399709:+|3:44399368:44402857:+.1	chr3:44399268-44402957	ENSG00000179152	TCAIM	T cell activation inhibitor, mitochondrial	se	TRUE	0.135	0.0043
se@3:45746701:45748272:+|3:45746701:45750990:+.1	chr3:45746601-45751090	ENSG00000211456	SACM1L	SAC1 suppressor of actin mutations 1-like (yeast)	se	FALSE	-0.135	0.01
se@3:48956431:48960181:+|3:48956431:48962151:+.1	chr3:48956331-48962251	ENSG00000177479	ARIH2	ariadne homolog 2 (Drosophila)	se	NA	-0.135	0.019
se@3:48956431:48960181:+|3:48956431:48964895:+.1	chr3:48956331-48964995	ENSG00000177479	ARIH2	ariadne homolog 2 (Drosophila)	se	NA	-0.275	0.00019
se@3:48965246:48982569:+|3:48965246:48999045:+.1	chr3:48965146-48999145	ENSG00000177479	ARIH2	ariadne homolog 2 (Drosophila)	se	TRUE	0.11	0.0082
se@3:50603292:50603437:-|3:50599178:50603437:-.1	chr3:50599078-50603537	ENSG00000088543	C3orf18	chromosome 3 open reading frame 18	se	NA	-0.145	1.6e-05
se@3:50603292:50604894:-|3:50599178:50604894:-.1	chr3:50599078-50604994	ENSG00000088543	C3orf18	chromosome 3 open reading frame 18	se	NA	-0.15	4e-05
se@3:51996104:52001342:-|3:51995320:52001342:-.1	chr3:51995220-52001442	ENSG00000090097	PCBP4	poly(rC) binding protein 4	se	NA	0.13	8.2e-05
se@3:56696518:56697569:-|3:56695045:56697569:-.1	chr3:56694945-56697669	ENSG00000163946	FAM208A	family with sequence similarity 208, member A	se	FALSE	-0.12	0.028
se@3:9944748:9945081:+|3:9944748:9945716:+.1	chr3:9944648-9945816	ENSG00000163701	IL17RE	interleukin 17 receptor E	se	FALSE	-0.32	0.00025
se@3:9945096:9945716:+|3:9945096:9948048:+.1	chr3:9944996-9948148	ENSG00000163701	IL17RE	interleukin 17 receptor E	se	NA	-0.105	0.00088
se@4:1093715:1102131:-|4:1090627:1102131:-.1	chr4:1090527-1102231	ENSG00000178222	RNF212	ring finger protein 212	se	TRUE	0.11	0.0047
se@4:120138828:120160373:+|4:120138828:120166492:+.1	chr4:120138728-120166592	ENSG00000145390	USP53	ubiquitin specific peptidase 53	se	NA	-0.155	0.0039
se@4:123236843:123237503:+|4:123236843:123237887:+.1	chr4:123236743-123237987	ENSG00000138688	KIAA1109	KIAA1109	se	NA	-0.105	0.0018
se@4:152065440:152069074:-|4:152065202:152069074:-.1	chr4:152065102-152069174	ENSG00000109686	SH3D19	SH3 domain containing 19	se	NA	0.24	7e-06
se@4:186560189:186567822:-|4:186556565:186567822:-.1	chr4:186556465-186567922	ENSG00000154556	SORBS2	sorbin and SH3 domain containing 2	se	NA	0.105	0.037
se@4:20706437:20714411:+|4:20706437:20715055:+.1	chr4:20706337-20715155	ENSG00000163138	PACRGL	PARK2 co-regulated-like	se	NA	-0.155	0.00072
se@4:20709493:20711306:+|4:20709493:20714411:+.1	chr4:20709393-20714511	ENSG00000163138	PACRGL	PARK2 co-regulated-like	se	FALSE	-0.155	0.00028
se@4:20715162:20726431:+|4:20715162:20728908:+.1	chr4:20715062-20729008	ENSG00000163138	PACRGL	PARK2 co-regulated-like	se	NA	0.21	2.1e-06
se@4:39462582:39463816:+|4:39462582:39465145:+.1	chr4:39462482-39465245	ENSG00000121897	LIAS	lipoic acid synthetase	se	FALSE	-0.115	0.002
se@4:48385801:48396593:+|4:48385801:48422142:+.1	chr4:48385701-48422242	ENSG00000109171	SLAIN2	SLAIN motif family, member 2	se	NA	0.13	7.4e-05
se@4:7008453:7011604:+|4:7008453:7012380:+.1	chr4:7008353-7012480	ENSG00000132405	TBC1D14	TBC1 domain family, member 14	se	NA	-0.145	0.00063
se@4:75675929:75681069:-|4:75673359:75681069:-.1	chr4:75673259-75681169	ENSG00000174808	BTC	betacellulin	se	NA	-0.225	0.00012
se@4:76715054:76716489:+|4:76715054:76720775:+.1	chr4:76714954-76720875	ENSG00000138768	USO1	USO1 vesicle transport factor	se	NA	0.115	0.0021
se@4:77057559:77065302:-|4:77055515:77065302:-.1	chr4:77055415-77065402	ENSG00000138750	NUP54	nucleoporin 54kDa	se	NA	-0.12	0.0013
se@4:77057565:77065302:-|4:77055515:77065302:-.1	chr4:77055415-77065402	ENSG00000138750	NUP54	nucleoporin 54kDa	se	FALSE	-0.14	0.00017
se@4:77057565:77065543:-|4:77055515:77065543:-.1	chr4:77055415-77065643	ENSG00000138750	NUP54	nucleoporin 54kDa	se	FALSE	-0.165	0.0049
se@4:77652088:77659914:+|4:77652088:77670170:+.1	chr4:77651988-77670270	ENSG00000138771	SHROOM3	shroom family member 3	se	FALSE	-0.165	0.028
se@4:78666029:78669470:-|4:78663449:78669470:-.1	chr4:78663349-78669570	ENSG00000138767	CNOT6L	CCR4-NOT transcription complex, subunit 6-like	se	FALSE	-0.11	0.005
se@4:83783725:83784471:-|4:83782861:83784471:-.1	chr4:83782761-83784571	ENSG00000138674	SEC31A	SEC31 homolog A (S. cerevisiae)	se	NA	0.115	0.018
se@4:83816927:83821230:-|4:83816000:83821230:-.1	chr4:83815900-83821330	ENSG00000251022	THAP9-AS1	NA	se	NA	-0.135	0.0048
se@5:102355547:102360838:+|5:102355547:102363886:+.1	chr5:102355447-102363986	ENSG00000145730	PAM	peptidylglycine alpha-amidating monooxygenase	se	NA	0.105	3.9e-06
se@5:123974516:123974826:-|5:123973599:123974826:-.1	chr5:123973499-123974926	ENSG00000168916	ZNF608	zinc finger protein 608	se	NA	0.34	3e-06
se@5:127417886:127418427:-|5:127412785:127418427:-.1	chr5:127412685-127418527	ENSG00000245937	CTC-228N24.3	NA	se	NA	-0.1	0.0007
se@5:131562914:131563483:-|5:131554337:131563483:-.1	chr5:131554237-131563583	ENSG00000072682	P4HA2	prolyl 4-hydroxylase, alpha polypeptide II	se	NA	0.135	0.0022
se@5:154214494:154217691:-|5:154210482:154217691:-.1	chr5:154210382-154217791	ENSG00000170271	C5orf4	chromosome 5 open reading frame 4	se	NA	-0.115	0.049
se@5:175782752:175788605:-|5:175779751:175788605:-.1	chr5:175779651-175788705	ENSG00000122203	KIAA1191	KIAA1191	se	NA	-0.11	4.5e-06
se@5:175786570:175786814:-|5:175775359:175786814:-.1	chr5:175775259-175786914	ENSG00000122203	KIAA1191	KIAA1191	se	TRUE	-0.14	0.0062
se@5:175786570:175786814:-|5:175782752:175786814:-.1	chr5:175782652-175786914	ENSG00000122203	KIAA1191	KIAA1191	se	NA	-0.1	0.037
se@5:176958522:176959444:-|5:176952206:176959444:-.1	chr5:176952106-176959544	ENSG00000146067	FAM193B	family with sequence similarity 193, member B	se	NA	0.135	5.5e-05
se@5:68665760:68666862:+|5:68665760:68667861:+.1	chr5:68665660-68667961	ENSG00000152942	RAD17	RAD17 homolog (S. pombe)	se	NA	-0.14	0.003
se@5:68856230:68858500:+|5:68856230:68860927:+.1	chr5:68856130-68861027	ENSG00000183474	GTF2H2C	general transcription factor IIH, polypeptide 2C	se	NA	0.26	0.013
se@5:74650522:74650881:+|5:74650522:74651190:+.1	chr5:74650422-74651290	ENSG00000113161	HMGCR	3-hydroxy-3-methylglutaryl-CoA reductase	se	NA	-0.115	0.013
se@5:95067788:95072593:+|5:95067788:95084037:+.1	chr5:95067688-95084137	ENSG00000164292	RHOBTB3	Rho-related BTB domain containing 3	se	FALSE	-0.1	0.032
se@6:125569529:125574863:+|6:125569529:125583980:+.1	chr6:125569429-125584080	ENSG00000111907	TPD52L1	tumor protein D52-like 1	se	NA	-0.1	0.0031
se@6:152201906:152265308:+|6:152201906:152382126:+.1	chr6:152201806-152382226	ENSG00000091831	ESR1	estrogen receptor 1	se	TRUE	-0.11	0.046
se@6:152332929:152382126:+|6:152332929:152419867:+.1	chr6:152332829-152419967	ENSG00000091831	ESR1	estrogen receptor 1	se	NA	-0.16	0.0095
se@6:152466690:152469180:-|6:152464900:152469180:-.1	chr6:152464800-152469280	ENSG00000131018	SYNE1	spectrin repeat containing, nuclear envelope 1	se	NA	0.14	0.0011
se@6:16328701:16486203:-|6:16307090:16486203:-.1	chr6:16306990-16486303	ENSG00000124788	ATXN1	ataxin 1	se	NA	-0.145	0.026
se@6:30282259:30293786:-|6:30264014:30293786:-.1	chr6:30263914-30293886	ENSG00000231074	HCG18	NA	se	NA	0.135	0.001
se@6:30282259:30294131:-|6:30264014:30294131:-.1	chr6:30263914-30294231	ENSG00000231074	HCG18	NA	se	NA	0.165	0.0054
se@6:30525227:30525927:+|6:30525227:30529105:+.1	chr6:30525127-30529205	ENSG00000204576	PRR3	proline rich 3	se	NA	-0.11	0.0036
se@6:30525227:30529105:+|6:30525227:30529611:+.1	chr6:30525127-30529711	ENSG00000204576	PRR3	proline rich 3	se	TRUE	-0.175	0.0016
se@6:30525989:30529105:+|6:30525989:30529611:+.1	chr6:30525889-30529711	ENSG00000204576	PRR3	proline rich 3	se	TRUE	-0.13	0.002
se@6:31895575:31895732:+|6:31895575:31901387:+.1	chr6:31895475-31901487	ENSG00000243649	CFB	complement factor B	se	NA	-0.16	0.0095
se@6:31895941:31896509:+|6:31895941:31901387:+.1	chr6:31895841-31901487	ENSG00000243649	CFB	complement factor B	se	NA	-0.325	0.015
se@6:31901742:31903700:+|6:31901742:31905096:+.1	chr6:31901642-31905196	ENSG00000243649	CFB	complement factor B	se	TRUE	-0.29	0.026
se@6:36438034:36442566:+|6:36438034:36446898:+.1	chr6:36437934-36446998	ENSG00000112078	KCTD20	potassium channel tetramerisation domain containing 20	se	FALSE	-0.14	0.0044
se@6:36438034:36442698:+|6:36438034:36446898:+.1	chr6:36437934-36446998	ENSG00000112078	KCTD20	potassium channel tetramerisation domain containing 20	se	NA	-0.115	0.016
se@6:99864304:99873091:-|6:99862562:99873091:-.1	chr6:99862462-99873191	ENSG00000132424	PNISR	PNN-interacting serine/arginine-rich protein	se	NA	-0.13	0.016
se@7:101840585:101842082:+|7:101840585:101843351:+.1	chr7:101840485-101843451	ENSG00000257923	CUX1	cut-like homeobox 1	se	NA	0.115	0.021
se@7:107220746:107221091:+|7:107220746:107224327:+.1	chr7:107220646-107224427	ENSG00000075790	BCAP29	B-cell receptor-associated protein 29	se	NA	-0.1	0.0067
se@7:128388858:128394583:+|7:128388858:128398925:+.1	chr7:128388758-128399025	ENSG00000128595	CALU	calumenin	se	FALSE	-0.14	0.0018
se@7:129710649:129736761:+|7:129710649:129756285:+.1	chr7:129710549-129756385	ENSG00000128607	KLHDC10	kelch domain containing 10	se	NA	0.135	0.00062
se@7:23719902:23724118:+|7:23719902:23728888:+.1	chr7:23719802-23728988	ENSG00000188732	FAM221A	family with sequence similarity 221, member A	se	NA	-0.16	0.00034
se@7:30059920:30062281:-|7:30058739:30062281:-.1	chr7:30058639-30062381	ENSG00000106080	FKBP14	FK506 binding protein 14, 22 kDa	se	TRUE	-0.1	0.0064
se@7:43927415:43946161:-|7:43927084:43946161:-.1	chr7:43926984-43946261	ENSG00000106608	URGCP	upregulator of cell proliferation	se	NA	-0.15	0.013
se@7:48141467:48142894:+|7:48141467:48146470:+.1	chr7:48141367-48146570	ENSG00000183696	UPP1	uridine phosphorylase 1	se	TRUE	0.1	0.00047
se@7:55211181:55214299:+|7:55211181:55218987:+.1	chr7:55211081-55219087	ENSG00000146648	EGFR	epidermal growth factor receptor	se	NA	-0.15	0.013
se@7:64254949:64275296:+|7:64254949:64291829:+.1	chr7:64254849-64291929	ENSG00000197008	ZNF138	zinc finger protein 138	se	NA	0.135	0.017
se@7:65440058:65441002:-|7:65439691:65441002:-.1	chr7:65439591-65441102	ENSG00000169919	GUSB	glucuronidase, beta	se	NA	-0.185	2.4e-07
se@7:66474671:66479354:+|7:66474671:66482840:+.1	chr7:66474571-66482940	ENSG00000198874	TYW1	tRNA-yW synthesizing protein 1 homolog (S. cerevisiae)	se	NA	-0.105	0.0019
se@7:75053508:75053809:-|7:75052486:75053809:-.1	chr7:75052386-75053909	ENSG00000135213	POM121C	POM121 transmembrane nucleoporin C	se	NA	-0.13	0.029
se@7:76121570:76126654:+|7:76121570:76129758:+.1	chr7:76121470-76129858	ENSG00000091073	DTX2	deltex homolog 2 (Drosophila)	se	NA	0.115	7.3e-05
se@7:99158318:99169311:+|7:99158318:99169868:+.1	chr7:99158218-99169968	ENSG00000197343	ZNF655	zinc finger protein 655	se	NA	0.135	0.001
se@8:104415552:104419862:-|8:104414282:104419862:-.1	chr8:104414182-104419962	ENSG00000164933	SLC25A32	solute carrier family 25 (mitochondrial folate carrier) , member 32	se	NA	-0.15	0.021
se@8:126104200:126114256:+|8:126104200:126114559:+.1	chr8:126104100-126114659	ENSG00000156831	NSMCE2	non-SMC element 2, MMS21 homolog (S. cerevisiae)	se	NA	-0.125	9e-05
se@8:126104200:126114293:+|8:126104200:126114559:+.1	chr8:126104100-126114659	ENSG00000156831	NSMCE2	non-SMC element 2, MMS21 homolog (S. cerevisiae)	se	NA	-0.11	0.0016
se@8:141935848:141993941:-|8:141900868:141993941:-.1	chr8:141900768-141994041	ENSG00000169398	PTK2	PTK2 protein tyrosine kinase 2	se	NA	0.1	0.032
se@8:146221993:146224989:-|8:146219978:146224989:-.1	chr8:146219878-146225089	ENSG00000196922	ZNF252P	NA	se	NA	-0.105	0.023
se@8:17838264:17840742:+|8:17838264:17842956:+.1	chr8:17838164-17843056	ENSG00000078674	PCM1	pericentriolar material 1	se	NA	0.1	6.4e-05
se@8:30240878:30241060:-|8:30240131:30241060:-.1	chr8:30240031-30241160	ENSG00000254109	CTD-3107M8.4	NA	se	NA	-0.11	0.0025
se@8:42210086:42211935:+|8:42210086:42213034:+.1	chr8:42209986-42213134	ENSG00000070501	POLB	polymerase (DNA directed), beta	se	NA	0.135	6.6e-05
se@8:48203726:48206456:+|8:48203726:48308936:+.1	chr8:48203626-48309036	ENSG00000164808	KIAA0146	KIAA0146	se	FALSE	-0.115	0.0058
se@8:67687554:67705851:+|8:67687554:67710777:+.1	chr8:67687454-67710877	ENSG00000104205	SGK3	serum/glucocorticoid regulated kinase family, member 3	se	NA	-0.135	0.015
se@8:71057083:71060508:-|8:71053634:71060508:-.1	chr8:71053534-71060608	ENSG00000140396	NCOA2	nuclear receptor coactivator 2	se	NA	-0.17	0.00087
se@8:79650870:79652237:-|8:79648762:79652237:-.1	chr8:79648662-79652337	ENSG00000104432	IL7	interleukin 7	se	NA	-0.21	0.00065
se@8:82629523:82630417:-|8:82627349:82630417:-.1	chr8:82627249-82630517	ENSG00000104231	ZFAND1	zinc finger, AN1-type domain 1	se	FALSE	0.19	2.7e-06
se@8:90770461:90775057:+|8:90770461:90777569:+.1	chr8:90770361-90777669	ENSG00000104312	RIPK2	receptor-interacting serine-threonine kinase 2	se	FALSE	-0.195	3.6e-05
se@8:95835789:95837121:+|8:95835789:95839491:+.1	chr8:95835689-95839591	ENSG00000164941	INTS8	integrator complex subunit 8	se	FALSE	-0.115	0.011
se@8:96044326:96046236:+|8:96044326:96047682:+.1	chr8:96044226-96047782	ENSG00000156170	NDUFAF6	NADH dehydrogenase (ubiquinone) complex I, assembly factor 6	se	TRUE	0.165	0.0077
se@9:100389894:100395525:-|9:100388279:100395525:-.1	chr9:100388179-100395625	ENSG00000136925	TSTD2	thiosulfate sulfurtransferase (rhodanese)-like domain containing 2	se	NA	-0.15	0.048
se@9:111697969:111698588:+|9:111697969:111701476:+.1	chr9:111697869-111701576	ENSG00000119328	FAM206A	family with sequence similarity 206, member A	se	FALSE	-0.14	2.8e-05
se@9:123605717:123607271:+|9:123605717:123609572:+.1	chr9:123605617-123609672	ENSG00000226752	RP11-27I1.2	NA	se	NA	-0.155	0.00069
se@9:128434922:128469250:-|9:128432186:128469250:-.1	chr9:128432086-128469350	ENSG00000119487	MAPKAP1	mitogen-activated protein kinase associated protein 1	se	NA	-0.11	0.0021
se@9:130496843:130497399:-|9:130495839:130497399:-.1	chr9:130495739-130497499	ENSG00000160404	TOR2A	torsin family 2, member A	se	FALSE	-0.105	0.016
se@9:130658611:130667486:-|9:130656970:130667486:-.1	chr9:130656870-130667586	ENSG00000160408	ST6GALNAC6	ST6 (alpha-N-acetyl-neuraminyl-2,3-beta-galactosyl-1,3)-N-acetylgalactosaminide alpha-2,6-sialyltransferase 6	se	NA	-0.12	0.024
se@9:134349111:134349841:+|9:134349111:134353131:+.1	chr9:134349011-134353231	ENSG00000130723	PRRC2B	proline-rich coiled-coil 2B	se	NA	-0.1	0.041
se@9:134378460:134379576:+|9:134378460:134381501:+.1	chr9:134378360-134381601	ENSG00000130714	POMT1	protein-O-mannosyltransferase 1	se	NA	-0.2	0.00067
se@9:135144876:135145002:-|9:135140372:135145002:-.1	chr9:135140272-135145102	ENSG00000107290	SETX	senataxin	se	NA	0.145	1.9e-05
se@9:139303519:139304542:-|9:139302390:139304542:-.1	chr9:139302290-139304642	ENSG00000165689	SDCCAG3	serologically defined colon cancer antigen 3	se	NA	0.105	1.1e-05
se@9:86383885:86395297:-|9:86368274:86395297:-.1	chr9:86368174-86395397	ENSG00000165113	GKAP1	G kinase anchoring protein 1	se	NA	0.13	0.0047
se@9:95050564:95051583:-|9:95050192:95051583:-.1	chr9:95050092-95051683	ENSG00000196305	IARS	isoleucyl-tRNA synthetase	se	FALSE	-0.115	0.011
se@9:99272071:99284788:-|9:99266071:99284788:-.1	chr9:99265971-99284888	ENSG00000081377	CDC14B	cell division cycle 14B	se	NA	0.14	0.00035
se@X:106356698:106358582:-|X:106332069:106358582:-.1	chrX:106331969-106358682	ENSG00000089682	RBM41	RNA binding motif protein 41	se	NA	0.13	0.025
se@X:106394197:106396402:-|X:106391039:106396402:-.1	chrX:106390939-106396502	ENSG00000198088	NUP62CL	nucleoporin 62kDa C-terminal like	se	NA	0.23	1.7e-06
se@X:109246000:109246729:+|X:109246000:109310575:+.1	chrX:109245900-109310675	ENSG00000157600	TMEM164	transmembrane protein 164	se	NA	-0.1	0.0015
se@X:119573148:119575585:-|X:119565317:119575585:-.1	chrX:119565217-119575685	ENSG00000005893	LAMP2	lysosomal-associated membrane protein 2	se	TRUE	0.125	0.0048
se@X:129146644:129146926:+|X:129146644:129154960:+.1	chrX:129146544-129155060	ENSG00000085185	BCORL1	BCL6 corepressor-like 1	se	NA	-0.13	0.023
se@X:152090800:152091264:+|X:152090800:152097119:+.1	chrX:152090700-152097219	ENSG00000147394	ZNF185	zinc finger protein 185 (LIM domain)	se	NA	0.1	0.007
se@X:153740735:153741147:-|X:153740204:153741147:-.1	chrX:153740104-153741247	ENSG00000071889	FAM3A	family with sequence similarity 3, member A	se	TRUE	0.115	0.016
se@X:23752484:23754036:-|X:23751334:23754036:-.1	chrX:23751234-23754136	ENSG00000123130	ACOT9	acyl-CoA thioesterase 9	se	NA	-0.105	0.032
se@X:41414888:41419032:-|X:41413168:41419032:-.1	chrX:41413068-41419132	ENSG00000147044	CASK	calcium/calmodulin-dependent serine protein kinase (MAGUK family)	se	NA	0.155	0.0093
se@X:46322728:46330577:+|X:46322728:46332185:+.1	chrX:46322628-46332285	ENSG00000147121	KRBOX4	KRAB box domain containing 4	se	NA	0.175	0.0001
se@X:46943999:46949175:+|X:46943999:46951077:+.1	chrX:46943899-46951177	ENSG00000130988	RGN	regucalcin (senescence marker protein-30)	se	NA	-0.145	0.016
se@X:70473124:70473879:-|X:70471451:70473879:-.1	chrX:70471351-70473979	ENSG00000147130	ZMYM3	zinc finger, MYM-type 3	se	NA	-0.155	0.012
