# Supplementary material for: Wild-Type U2AF1 Antagonizes the Splicing Program Characteristic of U2AF1-Mutant Tumors and Is Required for Cell Survival
Source: PLoS Genet. 2016 Oct 24;12(10):e1006384. doi: 10.1371/journal.pgen.1006384 (PMC5077151; doi:10.1371/journal.pgen.1006384)
Supplement: S5 Table — Same as S1 Table, but for HCC78-derived cell clones. (XLS) [file pgen.1006384.s024.xls]

## Sheet: S5
Event	Coordinates	Gene	Gene Name	Gene Description	Type	NMD Target	Psi_HCC78 (sgRNA-GFP and Cas9, clone#2)	Psi_HCC78 (sgRNA-GFP and Cas9, clone#3)	Psi_HCC78 (sgRNA-S34F and Cas9, clone#4)	Psi_HCC78 (sgRNA-S34F and Cas9, clone#6)	deltaPsi_HCC78 (sgRNA-GFP and Cas9, clone#2)-vs-HCC78 (sgRNA-S34F and Cas9, clone#4)	deltaPsi_HCC78 (sgRNA-GFP and Cas9, clone#3)-vs-HCC78 (sgRNA-S34F and Cas9, clone#6)	deltaPsi_HCC78 (sgRNA-GFP and Cas9, clone#2)-vs-HCC78 (sgRNA-S34F and Cas9, clone#6)	deltaPsi_HCC78 (sgRNA-GFP and Cas9, clone#3)-vs-HCC78 (sgRNA-S34F and Cas9, clone#4)
a3ss@1:100606070:100606408:+|1:100606070:100606523:+.1	chr1:100605970-100606623	ENSG00000122435	TRMT13	tRNA methyltransferase 13 homolog (S. cerevisiae)	a3ss	FALSE	0.56	0.47	0.91	0.92	-0.35	-0.45	-0.36	-0.44
a3ss@1:113217351:113217454:+|1:113217351:113217470:+.1	chr1:113217251-113217570	ENSG00000155363	MOV10	Mov10, Moloney leukemia virus 10, homolog (mouse)	a3ss	NA	0.28	0.2	0.33	0.34	-0.05	-0.14	-0.06	-0.13
a3ss@1:144300755:144301190:-|1:144300752:144301190:-.1	chr1:144300652-144301290	ENSG00000235398	LINC00623	NA	a3ss	NA	0.78	0.81	0.97	0.84	-0.19	-0.03	-0.06	-0.16
a3ss@1:149908266:149908475:-|1:149908122:149908475:-.1	chr1:149908022-149908575	ENSG00000014914	MTMR11	myotubularin related protein 11	a3ss	TRUE	0.3	0.17	0.14	0.13	0.16	0.04	0.17	0.03
a3ss@1:150802456:150804294:-|1:150802441:150804294:-.1	chr1:150802341-150804394	ENSG00000143437	ARNT	aryl hydrocarbon receptor nuclear translocator	a3ss	NA	0.95	0.97	0.91	0.86	0.04	0.11	0.09	0.06
a3ss@1:150975444:150978788:-|1:150974876:150978788:-|1:150974799:150978788:-|1:150974787:150978788:-|1:150974646:150978788:-.1	chr1:150974546-150978888	ENSG00000143409	FAM63A	family with sequence similarity 63, member A	a3ss	NA	0.9	0.9	0.76	0.72	0.14	0.18	0.18	0.14
a3ss@1:150990380:150990943:+|1:150990380:150991033:+.1	chr1:150990280-150991133	ENSG00000143363	PRUNE	prune homolog (Drosophila)	a3ss	NA	0.33	0.34	0.55	0.4	-0.22	-0.06	-0.07	-0.21
a3ss@1:150990380:150991033:+|1:150990380:150991036:+.1	chr1:150990280-150991136	ENSG00000143363	PRUNE	prune homolog (Drosophila)	a3ss	NA	0.81	0.63	0.68	0.92	0.13	-0.29	-0.11	-0.05
a3ss@1:155039916:155041329:+|1:155039916:155041475:+|1:155039916:155041495:+.1	chr1:155039816-155041595	ENSG00000243364	EFNA4	ephrin-A4	a3ss	NA	0.65	0.63	0.76	0.7	-0.11	-0.07	-0.05	-0.13
a3ss@1:155162101:155162577:-|1:155162074:155162577:-.1	chr1:155161974-155162677	ENSG00000185499	MUC1	mucin 1, cell surface associated	a3ss	NA	0.56	0.67	0.38	0.49	0.18	0.18	0.07	0.29
a3ss@1:155162101:155162577:-|1:155162074:155162577:-|1:155162038:155162577:-.1	chr1:155161938-155162677	ENSG00000185499	MUC1	mucin 1, cell surface associated	a3ss	NA	0.54	0.62	0.29	0.47	0.25	0.15	0.07	0.33
a3ss@1:155278756:155279834:+|1:155278756:155279836:+|1:155278756:155279855:+.1	chr1:155278656-155279955	ENSG00000160752	FDPS	farnesyl diphosphate synthase	a3ss	NA	0.43	0.42	0.6	0.63	-0.17	-0.21	-0.2	-0.18
a3ss@1:155279756:155279834:+|1:155279756:155279855:+.1	chr1:155279656-155279955	ENSG00000160752	FDPS	farnesyl diphosphate synthase	a3ss	NA	0.73	0.85	0.89	0.96	-0.16	-0.11	-0.23	-0.04
a3ss@1:155638568:155640111:-|1:155638508:155640111:-.1	chr1:155638408-155640211	ENSG00000163374	YY1AP1	YY1 associated protein 1	a3ss	NA	0.5	0.47	0.67	0.57	-0.17	-0.1	-0.07	-0.2
a3ss@1:158058244:158059244:+|1:158058244:158059292:+.1	chr1:158058144-158059392	ENSG00000183853	KIRREL	kin of IRRE like (Drosophila)	a3ss	NA	0.37	0.43	0.68	0.53	-0.31	-0.1	-0.16	-0.25
a3ss@1:16085343:16090988:+|1:16085343:16090991:+.1	chr1:16085243-16091091	ENSG00000162458	FBLIM1	filamin binding LIM protein 1	a3ss	NA	0.33	0.7	0.32	0.41	0.01	0.29	-0.08	0.38
a3ss@1:161719935:161721445:+|1:161719935:161721458:+.1	chr1:161719835-161721558	ENSG00000081721	DUSP12	dual specificity phosphatase 12	a3ss	TRUE	0.51	0.46	0.41	0.29	0.1	0.17	0.22	0.05
a3ss@1:163291856:163295822:+|1:163291856:163295865:+.1	chr1:163291756-163295965	ENSG00000143228	NUF2	NUF2, NDC80 kinetochore complex component, homolog (S. cerevisiae)	a3ss	NA	0.95	0.97	0.8	0.84	0.15	0.13	0.11	0.17
a3ss@1:165600530:165618992:+|1:165600530:165619078:+.1	chr1:165600430-165619178	ENSG00000143198	MGST3	microsomal glutathione S-transferase 3	a3ss	NA	0.24	0.11	0.2	0.22	0.04	-0.11	0.02	-0.09
a3ss@1:16973204:16973282:+|1:16973204:16973475:+.1	chr1:16973104-16973575	ENSG00000186301	MST1P2	NA	a3ss	NA	0.15	0.2	0.31	0.26	-0.16	-0.06	-0.11	-0.11
a3ss@1:169772450:169773216:+|1:169772450:169773253:+.1	chr1:169772350-169773353	ENSG00000000460	C1orf112	chromosome 1 open reading frame 112	a3ss	FALSE	0.81	0.95	0.78	0.85	0.03	0.1	-0.04	0.17
a3ss@1:203764922:203765421:+|1:203764922:203765579:+|1:203764922:203770703:+|1:203764922:203772085:+.1	chr1:203764822-203772185	ENSG00000058673	ZC3H11A	zinc finger CCCH-type containing 11A	a3ss	NA	0.29	0.28	0.08	0.18	0.21	0.1	0.11	0.2
a3ss@1:207262934:207263653:+|1:207262934:207263656:+.1	chr1:207262834-207263756	ENSG00000123843	C4BPB	complement component 4 binding protein, beta	a3ss	NA	0.54	0.57	0.56	0.79	-0.02	-0.22	-0.25	0.01
a3ss@1:243319757:243327586:-|1:243319649:243327586:-.1	chr1:243319549-243327686	ENSG00000143702	CEP170	centrosomal protein 170kDa	a3ss	NA	0.7	0.69	0.88	0.83	-0.18	-0.14	-0.13	-0.19
a3ss@1:247492917:247493268:-|1:247492870:247493268:-.1	chr1:247492770-247493368	ENSG00000162714	ZNF496	zinc finger protein 496	a3ss	NA	0.78	0.78	0.87	0.89	-0.09	-0.11	-0.11	-0.09
a3ss@1:27099123:27099303:+|1:27099123:27099306:+.1	chr1:27099023-27099406	ENSG00000117713	ARID1A	AT rich interactive domain 1A (SWI-like)	a3ss	NA	0.54	0.56	0.39	0.54	0.15	0.02	0	0.17
a3ss@1:29213722:29313943:+|1:29213722:29313960:+.1	chr1:29213622-29314060	ENSG00000159023	EPB41	erythrocyte membrane protein band 4.1 (elliptocytosis 1, RH-linked)	a3ss	NA	0.02	0.03	0.12	0.16	-0.1	-0.13	-0.14	-0.09
a3ss@1:31439125:31440014:-|1:31439044:31440014:-.1	chr1:31438944-31440114	ENSG00000134644	PUM1	pumilio homolog 1 (Drosophila)	a3ss	NA	0.81	0.84	0.71	0.78	0.1	0.06	0.03	0.13
a3ss@1:32682725:32682860:-|1:32682548:32682860:-.1	chr1:32682448-32682960	ENSG00000160055	TMEM234	transmembrane protein 234	a3ss	NA	0.07	0.13	0.1	0.03	-0.03	0.1	0.04	0.03
a3ss@1:3548902:3549962:-|1:3548881:3549962:-.1	chr1:3548781-3550062	ENSG00000116213	WRAP73	WD repeat containing, antisense to TP73	a3ss	NA	0.81	0.92	0.92	0.96	-0.11	-0.04	-0.15	0
a3ss@1:44679199:44679335:+|1:44679199:44679381:+|1:44679199:44679421:+.1	chr1:44679099-44679521	ENSG00000178028	DMAP1	DNA methyltransferase 1 associated protein 1	a3ss	NA	0.17	0.3	0.36	0.15	-0.19	0.15	0.02	-0.06
a3ss@1:44680570:44683867:+|1:44680570:44683983:+|1:44680570:44684013:+.1	chr1:44680470-44684113	ENSG00000178028	DMAP1	DNA methyltransferase 1 associated protein 1	a3ss	TRUE	0.36	0.4	0.24	0.19	0.12	0.21	0.17	0.16
a3ss@1:47728788:47735307:-|1:47728734:47735307:-.1	chr1:47728634-47735407	ENSG00000123473	STIL	SCL/TAL1 interrupting locus	a3ss	NA	0.22	0.35	0.37	0.44	-0.15	-0.09	-0.22	-0.02
a3ss@1:93677818:93680300:+|1:93677818:93680303:+.1	chr1:93677718-93680403	ENSG00000122483	CCDC18	coiled-coil domain containing 18	a3ss	NA	0.68	0.83	0.9	0.69	-0.22	0.14	-0.01	-0.07
a3ss@10:1142186:1149539:+|10:1142186:1149542:+.1	chr10:1142086-1149642	ENSG00000047056	WDR37	WD repeat domain 37	a3ss	NA	0.7	0.52	0.63	0.78	0.07	-0.26	-0.08	-0.11
a3ss@10:116207785:116211383:-|10:116207779:116211383:-.1	chr10:116207679-116211483	ENSG00000099204	ABLIM1	actin binding LIM protein 1	a3ss	NA	0.3	0.32	0.19	0.26	0.11	0.06	0.04	0.13
a3ss@10:120863709:120867460:+|10:120863709:120867480:+.1	chr10:120863609-120867580	ENSG00000119979	FAM45A	family with sequence similarity 45, member A	a3ss	TRUE	0.59	0.55	0.36	0.37	0.23	0.18	0.22	0.19
a3ss@10:124922344:124923336:+|10:124922344:124924563:+.1	chr10:124922244-124924663	ENSG00000154473	BUB3	BUB3 mitotic checkpoint protein	a3ss	NA	0.41	0.4	0.51	0.45	-0.1	-0.05	-0.04	-0.11
a3ss@10:127431845:127434276:+|10:127431845:127434341:+.1	chr10:127431745-127434441	ENSG00000107938	C10orf137	chromosome 10 open reading frame 137	a3ss	FALSE	0.68	0.72	0.89	0.82	-0.21	-0.1	-0.14	-0.17
a3ss@10:13151015:13151097:+|10:13151015:13151112:+.1	chr10:13150915-13151212	ENSG00000123240	OPTN	optineurin	a3ss	NA	0.52	0.42	0.39	0.76	0.13	-0.34	-0.24	0.03
a3ss@10:25146794:25147321:-|10:25145924:25147321:-.1	chr10:25145824-25147421	ENSG00000099256	PRTFDC1	phosphoribosyl transferase domain containing 1	a3ss	TRUE	0.67	0.57	0.45	0.33	0.22	0.24	0.34	0.12
a3ss@10:47900044:47901381:+|10:47900044:47901384:+.1	chr10:47899944-47901484	ENSG00000152726	FAM21B	family with sequence similarity 21, member B	a3ss	NA	0.87	0.85	0.99	0.96	-0.12	-0.11	-0.09	-0.14
a3ss@10:70496805:70502133:+|10:70496805:70502185:+.1	chr10:70496705-70502285	ENSG00000060339	CCAR1	cell division cycle and apoptosis regulator 1	a3ss	FALSE	0.8	0.69	0.56	0.87	0.24	-0.18	-0.07	0.13
a3ss@10:81568719:81574369:-|10:81568588:81574369:-.1	chr10:81568488-81574469	ENSG00000225484	RP11-773D16.1	NA	a3ss	NA	0.07	0	0.14	0.07	-0.07	-0.07	0	-0.14
a3ss@11:120918376:120924260:+|11:120918376:120924339:+.1	chr11:120918276-120924439	ENSG00000154114	TBCEL	tubulin folding cofactor E-like	a3ss	FALSE	0.73	0.81	0.54	0.73	0.19	0.08	0	0.27
a3ss@11:28311944:28318300:+|11:28311944:28318344:+.1	chr11:28311844-28318444	ENSG00000169519	METTL15	methyltransferase like 15	a3ss	NA	0.55	0.36	0.54	0.59	0.01	-0.23	-0.04	-0.18
a3ss@11:290600:290658:+|11:290600:290678:+.1	chr11:290500-290778	ENSG00000142102	ATHL1	ATH1, acid trehalase-like 1 (yeast)	a3ss	TRUE	0.06	0.05	0.17	0.1	-0.11	-0.05	-0.04	-0.12
a3ss@11:3062261:3063395:-|11:3062214:3063395:-.1	chr11:3062114-3063495	ENSG00000110619	CARS	cysteinyl-tRNA synthetase	a3ss	TRUE	0.07	0.07	0.25	0.12	-0.18	-0.05	-0.05	-0.18
a3ss@11:45992918:46001311:-|11:45992915:46001311:-.1	chr11:45992815-46001411	ENSG00000135365	PHF21A	PHD finger protein 21A	a3ss	NA	0.89	0.89	0.74	0.86	0.15	0.03	0.03	0.15
a3ss@11:47500504:47504247:-|11:47500492:47504247:-.1	chr11:47500392-47504347	ENSG00000149187	CELF1	CUGBP, Elav-like family member 1	a3ss	NA	0.52	0.52	0.72	0.63	-0.2	-0.11	-0.11	-0.2
a3ss@11:559062:559347:-|11:558979:559347:-.1	chr11:558879-559447	ENSG00000185522	C11orf35	chromosome 11 open reading frame 35	a3ss	TRUE	0.41	0.22	0.09	0.34	0.32	-0.12	0.07	0.13
a3ss@11:66247936:66249651:+|11:66247936:66249664:+|11:66247936:66249760:+.1	chr11:66247836-66249860	ENSG00000254986	DPP3	dipeptidyl-peptidase 3	a3ss	NA	0.09	0.15	0.19	0.13	-0.1	0.02	-0.04	-0.04
a3ss@11:6625052:6625410:+|11:6625052:6625456:+.1	chr11:6624952-6625556	ENSG00000166333	ILK	integrin-linked kinase	a3ss	NA	0.19	0.2	0.29	0.3	-0.1	-0.1	-0.11	-0.09
a3ss@11:77817992:77823696:-|11:77817958:77823696:-.1	chr11:77817858-77823796	ENSG00000159063	ALG8	asparagine-linked glycosylation 8, alpha-1,3-glucosyltransferase homolog (S. cerevisiae)	a3ss	NA	0.66	0.57	0.73	0.86	-0.07	-0.29	-0.2	-0.16
a3ss@11:802891:803174:-|11:802854:803174:-.1	chr11:802754-803274	ENSG00000177595	PIDD	p53-induced death domain protein	a3ss	FALSE	0.94	0.92	0.81	0.65	0.13	0.27	0.29	0.11
a3ss@11:829540:829968:+|11:829540:829986:+.1	chr11:829440-830086	ENSG00000177685	EFCAB4A	EF-hand calcium binding domain 4A	a3ss	NA	0.01	0.08	0.11	0.08	-0.1	0	-0.07	-0.03
a3ss@11:85693046:85694909:-|11:85693031:85694909:-.1	chr11:85692931-85695009	ENSG00000073921	PICALM	phosphatidylinositol binding clathrin assembly protein	a3ss	NA	0.84	0.83	0.68	0.62	0.16	0.21	0.22	0.15
a3ss@11:8642868:8643192:-|11:8642784:8643192:-.1	chr11:8642684-8643292	ENSG00000166436	TRIM66	tripartite motif containing 66	a3ss	NA	0.62	0.67	0.33	0.61	0.29	0.06	0.01	0.34
a3ss@12:100551223:100551306:-|12:100551034:100551306:-.1	chr12:100550934-100551406	ENSG00000238105	GOLGA2P5	NA	a3ss	TRUE	0.61	0.39	0.6	0.61	0.01	-0.22	0	-0.21
a3ss@12:108938308:108938915:-|12:108938254:108938915:-.1	chr12:108938154-108939015	ENSG00000075856	SART3	squamous cell carcinoma antigen recognized by T cells 3	a3ss	NA	0.08	0.08	0.22	0.18	-0.14	-0.1	-0.1	-0.14
a3ss@12:109530742:109531155:-|12:109530592:109531155:-.1	chr12:109530492-109531255	ENSG00000189046	ALKBH2	alkB, alkylation repair homolog 2 (E. coli)	a3ss	NA	0.69	0.57	0.77	0.73	-0.08	-0.16	-0.04	-0.2
a3ss@12:110386651:110388972:-|12:110385309:110388972:-.1	chr12:110385209-110389072	ENSG00000139436	GIT2	G protein-coupled receptor kinase interacting ArfGAP 2	a3ss	TRUE	0.15	0.18	0.35	0.19	-0.2	-0.01	-0.04	-0.17
a3ss@12:110386651:110390897:-|12:110385309:110390897:-.1	chr12:110385209-110390997	ENSG00000139436	GIT2	G protein-coupled receptor kinase interacting ArfGAP 2	a3ss	TRUE	0.13	0.17	0.31	0.18	-0.18	-0.01	-0.05	-0.14
a3ss@12:113346629:113348856:+|12:113346629:113348903:+.1	chr12:113346529-113349003	ENSG00000089127	OAS1	2'-5'-oligoadenylate synthetase 1, 40/46kDa	a3ss	FALSE	0.82	0.83	0.89	0.93	-0.07	-0.1	-0.11	-0.06
a3ss@12:113355505:113357194:+|12:113355505:113357292:+.1	chr12:113355405-113357392	ENSG00000089127	OAS1	2'-5'-oligoadenylate synthetase 1, 40/46kDa	a3ss	NA	0.63	0.65	0.43	0.45	0.2	0.2	0.18	0.22
a3ss@12:113546030:113549891:-|12:113546027:113549891:-.1	chr12:113545927-113549991	ENSG00000111344	RASAL1	RAS protein activator like 1 (GAP1 like)	a3ss	NA	0.22	0.12	0.07	0.19	0.15	-0.07	0.03	0.05
a3ss@12:121766300:121768386:-|12:121766261:121768386:-.1	chr12:121766161-121768486	ENSG00000089053	ANAPC5	anaphase promoting complex subunit 5	a3ss	NA	0.58	0.61	0.7	0.66	-0.12	-0.05	-0.08	-0.09
a3ss@12:121766300:121768386:-|12:121766276:121768386:-|12:121766261:121768386:-.1	chr12:121766161-121768486	ENSG00000089053	ANAPC5	anaphase promoting complex subunit 5	a3ss	NA	0.58	0.6	0.7	0.65	-0.12	-0.05	-0.07	-0.1
a3ss@12:42836543:42838849:+|12:42836543:42839775:+|12:42836543:42839793:+|12:42836543:42839868:+.1	chr12:42836443-42839968	ENSG00000134283	PPHLN1	periphilin 1	a3ss	TRUE	0.27	0.23	0.17	0.16	0.1	0.07	0.11	0.06
a3ss@12:48357416:48357928:+|12:48357416:48357992:+|12:48357416:48358064:+.1	chr12:48357316-48358164	ENSG00000134291	TMEM106C	transmembrane protein 106C	a3ss	NA	0.03	0.03	0.02	0.18	0.01	-0.15	-0.15	0.01
a3ss@12:77208990:77209637:+|12:77208990:77209678:+.1	chr12:77208890-77209778	ENSG00000186908	ZDHHC17	zinc finger, DHHC-type containing 17	a3ss	FALSE	0.66	0.62	0.79	0.87	-0.13	-0.25	-0.21	-0.17
a3ss@13:28019293:28024279:-|13:28019274:28024279:-.1	chr13:28019174-28024379	ENSG00000122033	MTIF3	mitochondrial translational initiation factor 3	a3ss	NA	0.76	0.62	0.89	0.84	-0.13	-0.22	-0.08	-0.27
a3ss@14:103933528:103934370:+|14:103933528:103934418:+.1	chr14:103933428-103934518	ENSG00000075413	MARK3	MAP/microtubule affinity-regulating kinase 3	a3ss	NA	0.47	0.65	0.71	0.79	-0.24	-0.14	-0.32	-0.06
a3ss@14:105958037:105958444:+|14:105958037:105958446:+|14:105958037:105958485:+.1	chr14:105957937-105958585	ENSG00000185347	C14orf80	chromosome 14 open reading frame 80	a3ss	FALSE	0.82	0.71	0.91	0.94	-0.09	-0.23	-0.12	-0.2
a3ss@14:105958037:105958444:+|14:105958037:105958485:+.1	chr14:105957937-105958585	ENSG00000185347	C14orf80	chromosome 14 open reading frame 80	a3ss	FALSE	0.84	0.72	0.93	0.94	-0.09	-0.22	-0.1	-0.21
a3ss@14:24032491:24032589:-|14:24031802:24032589:-.1	chr14:24031702-24032689	ENSG00000213983	AP1G2	adaptor-related protein complex 1, gamma 2 subunit	a3ss	TRUE	0.29	0.29	0.2	0.14	0.09	0.15	0.15	0.09
a3ss@14:24033430:24033542:-|14:24033368:24033542:-.1	chr14:24033268-24033642	ENSG00000213983	AP1G2	adaptor-related protein complex 1, gamma 2 subunit	a3ss	TRUE	0.26	0.2	0.18	0.14	0.08	0.06	0.12	0.02
a3ss@14:31598654:31602444:-|14:31598513:31602444:-.1	chr14:31598413-31602544	ENSG00000092148	HECTD1	HECT domain containing E3 ubiquitin protein ligase 1	a3ss	NA	0.3	0.34	0.55	0.46	-0.25	-0.12	-0.16	-0.21
a3ss@14:58762529:58764673:-|14:58760644:58764673:-.1	chr14:58760544-58764773	ENSG00000257621	RP11-349A22.5	NA	a3ss	NA	0.34	0.41	0.43	0.63	-0.09	-0.22	-0.29	-0.02
a3ss@14:67736500:67745735:+|14:67736500:67745967:+.1	chr14:67736400-67746067	ENSG00000072415	MPP5	membrane protein, palmitoylated 5 (MAGUK p55 subfamily member 5)	a3ss	NA	0.23	0.21	0.4	0.35	-0.17	-0.14	-0.12	-0.19
a3ss@14:70235968:70236228:+|14:70235968:70237184:+.1	chr14:70235868-70237284	ENSG00000100650	SRSF5	serine/arginine-rich splicing factor 5	a3ss	TRUE	0.78	0.78	0.77	0.62	0.01	0.16	0.16	0.01
a3ss@14:94577143:94577971:+|14:94577143:94578005:+.1	chr14:94577043-94578105	ENSG00000165949	IFI27	interferon, alpha-inducible protein 27	a3ss	NA	0.61	0.64	0.48	0.46	0.13	0.18	0.15	0.16
a3ss@15:22842183:22845759:+|15:22842183:22845762:+.1	chr15:22842083-22845862	ENSG00000153575	TUBGCP5	tubulin, gamma complex associated protein 5	a3ss	NA	0.23	0.17	0.06	0.12	0.17	0.05	0.11	0.11
a3ss@15:23283416:23285705:-|15:23283153:23285705:-.1	chr15:23283053-23285805	ENSG00000140181	HERC2P2	NA	a3ss	NA	0.53	0.58	0.46	0.46	0.07	0.12	0.07	0.12
a3ss@15:25327852:25328514:+|15:25327852:25328543:+.1	chr15:25327752-25328643	ENSG00000224078	SNHG14	NA	a3ss	NA	0.19	0.29	0.2	0.12	-0.01	0.17	0.07	0.09
a3ss@15:41641439:41643186:+|15:41641439:41643231:+.1	chr15:41641339-41643331	ENSG00000137804	NUSAP1	nucleolar and spindle associated protein 1	a3ss	NA	0.33	0.32	0.52	0.53	-0.19	-0.21	-0.2	-0.2
a3ss@15:43485001:43486279:+|15:43485001:43486613:+.1	chr15:43484901-43486713	ENSG00000166946	CCNDBP1	cyclin D-type binding-protein 1	a3ss	TRUE	0.26	0.29	0.21	0.16	0.05	0.13	0.1	0.08
a3ss@15:43888729:43889574:+|15:43888729:43890391:+.1	chr15:43888629-43890491	ENSG00000237289	CKMT1B	creatine kinase, mitochondrial 1B	a3ss	TRUE	0.33	0.05	0.08	0.58	0.25	-0.53	-0.25	-0.03
a3ss@15:49429655:49431725:-|15:49429634:49431725:-.1	chr15:49429534-49431825	ENSG00000166200	COPS2	COP9 constitutive photomorphogenic homolog subunit 2 (Arabidopsis)	a3ss	NA	0.22	0.22	0.39	0.34	-0.17	-0.12	-0.12	-0.17
a3ss@15:59192136:59193459:-|15:59192082:59193459:-.1	chr15:59191982-59193559	ENSG00000137776	SLTM	SAFB-like, transcription modulator	a3ss	NA	0.37	0.37	0.53	0.52	-0.16	-0.15	-0.15	-0.16
a3ss@15:59383353:59384712:+|15:59383353:59384736:+.1	chr15:59383253-59384836	ENSG00000157450	RNF111	ring finger protein 111	a3ss	NA	0.48	0.45	0.45	0.31	0.03	0.14	0.17	0
a3ss@15:75195127:75197005:-|15:75195124:75197005:-.1	chr15:75195024-75197105	ENSG00000178761	FAM219B	family with sequence similarity 219, member B	a3ss	NA	0.8	0.85	0.69	0.75	0.11	0.1	0.05	0.16
a3ss@15:83674444:83677300:-|15:83673724:83677300:-.1	chr15:83673624-83677400	ENSG00000169609	C15orf40	chromosome 15 open reading frame 40	a3ss	NA	0.85	0.9	0.75	0.82	0.1	0.08	0.03	0.15
a3ss@15:91157720:91161115:+|15:91157720:91161118:+.1	chr15:91157620-91161218	ENSG00000140577	CRTC3	CREB regulated transcription coactivator 3	a3ss	NA	0.83	0.68	0.79	0.93	0.04	-0.25	-0.1	-0.11
a3ss@15:91184431:91185164:+|15:91184431:91185167:+.1	chr15:91184331-91185267	ENSG00000140577	CRTC3	CREB regulated transcription coactivator 3	a3ss	NA	0.67	0.8	0.73	0.58	-0.06	0.22	0.09	0.07
a3ss@15:94899530:94901711:+|15:94899530:94901776:+.1	chr15:94899430-94901876	ENSG00000140563	MCTP2	multiple C2 domains, transmembrane 2	a3ss	FALSE	0.77	0.75	0.93	0.81	-0.16	-0.06	-0.04	-0.18
a3ss@16:11935857:11945265:-|16:11935786:11945265:-.1	chr16:11935686-11945365	ENSG00000171490	RSL1D1	ribosomal L1 domain containing 1	a3ss	NA	0.6	0.58	0.6	0.69	0	-0.11	-0.09	-0.02
a3ss@16:20810389:20810585:-|16:20809533:20810585:-.1	chr16:20809433-20810685	ENSG00000196678	ERI2	ERI1 exoribonuclease family member 2	a3ss	NA	0.59	0.6	0.46	0.44	0.13	0.16	0.15	0.14
a3ss@16:21170067:21172299:+|16:21170067:21172406:+.1	chr16:21169967-21172506	ENSG00000011638	TMEM159	transmembrane protein 159	a3ss	NA	0.34	0.29	0.53	0.49	-0.19	-0.2	-0.15	-0.24
a3ss@16:22446132:22447003:-|16:22446071:22447003:-.1	chr16:22445971-22447103	ENSG00000257122	RRN3P3	NA	a3ss	NA	0.66	0.79	0.88	0.86	-0.22	-0.07	-0.2	-0.09
a3ss@16:278401:279278:-|16:277335:279278:-.1	chr16:277235-279378	ENSG00000007392	LUC7L	LUC7-like (S. cerevisiae)	a3ss	TRUE	0.42	0.37	0.35	0.23	0.07	0.14	0.19	0.02
a3ss@16:28847497:28848049:+|16:28847497:28848072:+.1	chr16:28847397-28848172	ENSG00000168488	ATXN2L	ataxin 2-like	a3ss	NA	0.57	0.59	0.74	0.62	-0.17	-0.03	-0.05	-0.15
a3ss@16:28847497:28848069:+|16:28847497:28848072:+.1	chr16:28847397-28848172	ENSG00000168488	ATXN2L	ataxin 2-like	a3ss	NA	0.24	0.22	0.48	0.28	-0.24	-0.06	-0.04	-0.26
a3ss@16:29471306:29472672:+|16:29471306:29472703:+.1	chr16:29471206-29472803	ENSG00000213648	SULT1A4	sulfotransferase family, cytosolic, 1A, phenol-preferring, member 4	a3ss	NA	0.49	0.96	0.99	0.92	-0.5	0.04	-0.43	-0.03
a3ss@16:29560083:30204679:-|16:29559979:30204679:-.1	chr16:29559879-30204779	ENSG00000169627	BOLA2B	bolA homolog 2B (E. coli)	a3ss	NA	0.03	0.01	0.16	0.22	-0.13	-0.21	-0.19	-0.15
a3ss@16:29973453:29974428:+|16:29973453:29974431:+.1	chr16:29973353-29974531	ENSG00000149932	TMEM219	transmembrane protein 219	a3ss	NA	0.51	0.42	0.5	0.39	0.01	0.03	0.12	-0.08
a3ss@16:685063:685281:-|16:684956:685281:-.1	chr16:684856-685381	ENSG00000130731	C16orf13	chromosome 16 open reading frame 13	a3ss	TRUE	0.14	0.13	0.23	0.19	-0.09	-0.06	-0.05	-0.1
a3ss@16:70176292:70176374:+|16:70176292:70176456:+.1	chr16:70176192-70176556	ENSG00000090857	PDPR	pyruvate dehydrogenase phosphatase regulatory subunit	a3ss	TRUE	0.1	0.14	0.11	0.01	-0.01	0.13	0.09	0.03
a3ss@16:89800446:89804129:+|16:89800446:89804214:+.1	chr16:89800346-89804314	ENSG00000158805	ZNF276	zinc finger protein 276	a3ss	TRUE	0.16	0.15	0.05	0.14	0.11	0.01	0.02	0.1
a3ss@16:90045286:90045710:+|16:90045286:90046650:+.1	chr16:90045186-90046750	ENSG00000223959	AFG3L1P	NA	a3ss	NA	0.18	0.29	0.13	0.16	0.05	0.13	0.02	0.16
a3ss@16:90094130:90097584:+|16:90094130:90097598:+|16:90094130:90097707:+.1	chr16:90094030-90097807	ENSG00000141013	GAS8	growth arrest-specific 8	a3ss	TRUE	0.14	0.07	0.2	0.19	-0.06	-0.12	-0.05	-0.13
a3ss@17:15603091:15603362:+|17:15603091:15603449:+|17:15603091:15603522:+.1	chr17:15602991-15603622	ENSG00000187607	ZNF286A	zinc finger protein 286A	a3ss	NA	0.78	0.62	0.68	0.89	0.1	-0.27	-0.11	-0.06
a3ss@17:15611561:15619314:+|17:15611561:15619373:+.1	chr17:15611461-15619473	ENSG00000187607	ZNF286A	zinc finger protein 286A	a3ss	NA	0.38	0.36	0.37	0.6	0.01	-0.24	-0.22	-0.01
a3ss@17:16342728:16342842:+|17:16342728:16342895:+|17:16342728:16342974:+.1	chr17:16342628-16343074	ENSG00000175061	C17orf76-AS1	NA	a3ss	TRUE	0.35	0.35	0.51	0.56	-0.16	-0.21	-0.21	-0.16
a3ss@17:35902667:35913217:-|17:35902532:35913217:-.1	chr17:35902432-35913317	ENSG00000006114	SYNRG	synergin, gamma	a3ss	NA	0.66	0.83	0.82	0.71	-0.16	0.12	-0.05	0.01
a3ss@17:38063240:38066009:-|17:38062524:38066009:-.1	chr17:38062424-38066109	ENSG00000073605	GSDMB	gasdermin B	a3ss	NA	0.33	0.34	0.46	0.37	-0.13	-0.03	-0.04	-0.12
a3ss@17:42188171:42194862:-|17:42188168:42194862:-.1	chr17:42188068-42194962	ENSG00000108840	HDAC5	histone deacetylase 5	a3ss	NA	0.53	0.56	0.56	0.4	-0.03	0.16	0.13	0
a3ss@17:42255184:42258991:-|17:42254010:42258991:-.1	chr17:42253910-42259091	ENSG00000267080	ASB16-AS1	NA	a3ss	NA	0.9	0.94	0.81	0.82	0.09	0.12	0.08	0.13
a3ss@17:4844021:4844168:+|17:4844021:4844218:+.1	chr17:4843921-4844318	ENSG00000108523	RNF167	ring finger protein 167	a3ss	NA	0.71	0.68	0.8	0.79	-0.09	-0.11	-0.08	-0.12
a3ss@17:62969635:62970673:-|17:62969470:62970673:-|17:62969045:62970673:-.1	chr17:62968945-62970773	ENSG00000214174	AMZ2P1	NA	a3ss	NA	0.8	0.72	0.87	0.76	-0.07	-0.04	0.04	-0.15
a3ss@17:65156481:65157013:-|17:65156478:65157013:-.1	chr17:65156378-65157113	ENSG00000198265	HELZ	helicase with zinc finger	a3ss	NA	0.39	0.33	0.51	0.28	-0.12	0.05	0.11	-0.18
a3ss@17:7222010:7222369:-|17:7221993:7222369:-.1	chr17:7221893-7222469	ENSG00000215041	NEURL4	neuralized homolog 4 (Drosophila)	a3ss	TRUE	0.05	0.01	0.06	0.11	-0.01	-0.1	-0.06	-0.05
a3ss@17:7286408:7286547:+|17:7286408:7286569:+.1	chr17:7286308-7286669	ENSG00000174292	TNK1	tyrosine kinase, non-receptor, 1	a3ss	TRUE	0.04	0.03	0.16	0.09	-0.12	-0.06	-0.05	-0.13
a3ss@17:7297590:7297796:-|17:7297586:7297796:-|17:7297478:7297796:-.1	chr17:7297378-7297896	ENSG00000187838	PLSCR3	phospholipid scramblase 3	a3ss	NA	0.33	0.56	0.31	0.21	0.02	0.35	0.12	0.25
a3ss@17:73265550:73266195:-|17:73265529:73266195:-.1	chr17:73265429-73266295	ENSG00000125457	MIF4GD	MIF4G domain containing	a3ss	NA	0.45	0.65	0.69	0.68	-0.24	-0.03	-0.23	-0.04
a3ss@17:73621740:73621846:+|17:73621740:73621924:+.1	chr17:73621640-73622024	ENSG00000266714	MYO15B	Putative unconventional myosin-XVB	a3ss	NA	0.49	0.37	0.11	0.15	0.38	0.22	0.34	0.26
a3ss@17:73624905:73625014:-|17:73624842:73625014:-.1	chr17:73624742-73625114	ENSG00000108469	RECQL5	RecQ protein-like 5	a3ss	NA	0.22	0.17	0.32	0.42	-0.1	-0.25	-0.2	-0.15
a3ss@17:73918177:73919267:-|17:73918127:73919267:-.1	chr17:73918027-73919367	ENSG00000188878	FBF1	Fas (TNFRSF6) binding factor 1	a3ss	TRUE	0.49	0.37	0.22	0.28	0.27	0.09	0.21	0.15
a3ss@17:76123055:76124693:-|17:76122987:76124693:-.1	chr17:76122887-76124793	ENSG00000141524	TMC6	transmembrane channel-like 6	a3ss	NA	0.29	0.15	0.3	0.34	-0.01	-0.19	-0.05	-0.15
a3ss@17:76400170:76410960:+|17:76400170:76411033:+.1	chr17:76400070-76411133	ENSG00000087157	PGS1	phosphatidylglycerophosphate synthase 1	a3ss	FALSE	0.58	0.53	0.73	0.7	-0.15	-0.17	-0.12	-0.2
a3ss@17:79649705:79650043:-|17:79649179:79650043:-.1	chr17:79649079-79650143	ENSG00000214087	ARL16	ADP-ribosylation factor-like 16	a3ss	TRUE	0.37	0.38	0.19	0.22	0.18	0.16	0.15	0.19
a3ss@17:8169671:8169819:+|17:8169671:8170071:+.1	chr17:8169571-8170171	ENSG00000178921	PFAS	phosphoribosylformylglycinamidine synthase	a3ss	TRUE	0.34	0.3	0.33	0.21	0.01	0.09	0.13	-0.03
a3ss@18:72163666:72167117:+|18:72163666:72167172:+.1	chr18:72163566-72167272	ENSG00000133313	CNDP2	CNDP dipeptidase 2 (metallopeptidase M20 family)	a3ss	NA	0.39	0.42	0.53	0.46	-0.14	-0.04	-0.07	-0.11
a3ss@18:9595151:9614224:-|18:9595100:9614224:-.1	chr18:9595000-9614324	ENSG00000154845	PPP4R1	protein phosphatase 4, regulatory subunit 1	a3ss	NA	0.27	0.24	0.29	0.42	-0.02	-0.18	-0.15	-0.05
a3ss@19:14263034:14263121:-|19:14262962:14263121:-.1	chr19:14262862-14263221	ENSG00000072071	LPHN1	latrophilin 1	a3ss	NA	0.53	0.53	0.36	0.39	0.17	0.14	0.14	0.17
a3ss@19:1612432:1615284:-|19:1612429:1615284:-.1	chr19:1612329-1615384	ENSG00000071564	TCF3	transcription factor 3 (E2A immunoglobulin enhancer binding factors E12/E47)	a3ss	NA	0.77	0.65	0.75	0.84	0.02	-0.19	-0.07	-0.1
a3ss@19:17339118:17339190:+|19:17339118:17339240:+|19:17339118:17339612:+.1	chr19:17339018-17339712	ENSG00000099330	OCEL1	occludin/ELL domain containing 1	a3ss	NA	0.1	0.17	0.05	0.06	0.05	0.11	0.04	0.12
a3ss@19:17378325:17379565:+|19:17378325:17379603:+.1	chr19:17378225-17379703	ENSG00000105393	BABAM1	BRISC and BRCA1 A complex member 1	a3ss	NA	0.46	0.49	0.65	0.53	-0.19	-0.04	-0.07	-0.16
a3ss@19:2039855:2040133:-|19:2037828:2040133:-.1	chr19:2037728-2040233	ENSG00000099875	MKNK2	MAP kinase interacting serine/threonine kinase 2	a3ss	NA	0.62	0.63	0.49	0.48	0.13	0.15	0.14	0.14
a3ss@19:36122307:36123979:+|19:36122307:36124000:+.1	chr19:36122207-36124100	ENSG00000126254	RBM42	RNA binding motif protein 42	a3ss	NA	0.21	0.3	0.21	0.19	0	0.11	0.02	0.09
a3ss@19:36276385:36277315:+|19:36276385:36277798:+.1	chr19:36276285-36277898	ENSG00000004777	ARHGAP33	Rho GTPase activating protein 33	a3ss	NA	0.85	0.97	0.67	0.81	0.18	0.16	0.04	0.3
a3ss@19:37838774:37853008:+|19:37838774:37853011:+.1	chr19:37838674-37853111	ENSG00000181666	HKR1	HKR1, GLI-Kruppel zinc finger family member	a3ss	NA	0.31	0.38	0.29	0.11	0.02	0.27	0.2	0.09
a3ss@19:40854675:40871460:+|19:40854675:40871569:+|19:40854675:40871625:+|19:40854675:40871764:+.1	chr19:40854575-40871864	ENSG00000105223	PLD3	phospholipase D family, member 3	a3ss	NA	0.27	0.23	0.38	0.43	-0.11	-0.2	-0.16	-0.15
a3ss@19:4324664:4325213:-|19:4324526:4325213:-.1	chr19:4324426-4325313	ENSG00000178078	STAP2	signal transducing adaptor family member 2	a3ss	NA	0.15	0.14	0.27	0.24	-0.12	-0.1	-0.09	-0.13
a3ss@19:44669295:44669741:+|19:44669295:44669910:+.1	chr19:44669195-44670010	ENSG00000167380	ZNF226	zinc finger protein 226	a3ss	NA	0.16	0.15	0.23	0.3	-0.07	-0.15	-0.14	-0.08
a3ss@19:49979058:49979374:+|19:49979058:49979402:+.1	chr19:49978958-49979502	ENSG00000090554	FLT3LG	fms-related tyrosine kinase 3 ligand	a3ss	TRUE	0.04	0.02	0.03	0.17	0.01	-0.15	-0.13	-0.01
a3ss@19:55718344:55718534:-|19:55718323:55718534:-.1	chr19:55718223-55718634	ENSG00000080031	PTPRH	protein tyrosine phosphatase, receptor type, H	a3ss	NA	0.21	0.3	0.17	0.34	0.04	-0.04	-0.13	0.13
a3ss@19:56159643:56160124:+|19:56159643:56160261:+|19:56159643:56160312:+|19:56159643:56160368:+.1	chr19:56159543-56160468	ENSG00000173581	CCDC106	coiled-coil domain containing 106	a3ss	NA	0.49	0.54	0.39	0.48	0.1	0.06	0.01	0.15
a3ss@19:56159643:56160124:+|19:56159643:56160312:+|19:56159643:56160368:+.1	chr19:56159543-56160468	ENSG00000173581	CCDC106	coiled-coil domain containing 106	a3ss	NA	0.5	0.55	0.39	0.49	0.11	0.06	0.01	0.16
a3ss@19:6745005:6746040:+|19:6745005:6746189:+.1	chr19:6744905-6746289	ENSG00000125733	TRIP10	thyroid hormone receptor interactor 10	a3ss	FALSE	0.15	0.17	0.28	0.28	-0.13	-0.11	-0.13	-0.11
a3ss@19:9451860:9452293:+|19:9451860:9452371:+.1	chr19:9451760-9452471	ENSG00000188321	ZNF559	zinc finger protein 559	a3ss	NA	0.17	0.36	0.36	0.48	-0.19	-0.12	-0.31	0
a3ss@19:9490815:9491265:+|19:9490815:9491824:+.1	chr19:9490715-9491924	ENSG00000188629	ZNF177	zinc finger protein 177	a3ss	NA	0.42	0.75	0.5	0.34	-0.08	0.41	0.08	0.25
a3ss@2:102475544:102476105:+|2:102475544:102476198:+.1	chr2:102475444-102476298	ENSG00000071054	MAP4K4	mitogen-activated protein kinase kinase kinase kinase 4	a3ss	NA	0.51	0.57	0.49	0.46	0.02	0.11	0.05	0.08
a3ss@2:109378651:109379693:+|2:109378651:109382621:+.1	chr2:109378551-109382721	ENSG00000153201	RANBP2	RAN binding protein 2	a3ss	NA	1	1	0.81	1	0.19	0	0	0.19
a3ss@2:114251571:114252694:+|2:114251571:114252697:+.1	chr2:114251471-114252797	ENSG00000136682	CBWD2	COBW domain containing 2	a3ss	NA	0.11	0.01	0.18	0.06	-0.07	-0.05	0.05	-0.17
a3ss@2:139308174:139308473:+|2:139308174:139308544:+.1	chr2:139308074-139308644	ENSG00000144228	SPOPL	speckle-type POZ protein-like	a3ss	FALSE	0.55	0.64	0.63	0.7	-0.08	-0.06	-0.15	0.01
a3ss@2:190612057:190615276:-|2:190611894:190615276:-.1	chr2:190611794-190615376	ENSG00000128694	OSGEPL1	O-sialoglycoprotein endopeptidase-like 1	a3ss	NA	0.77	0.76	0.62	0.72	0.15	0.04	0.05	0.14
a3ss@2:202025665:202027719:+|2:202025665:202028558:+.1	chr2:202025565-202028658	ENSG00000003402	CFLAR	CASP8 and FADD-like apoptosis regulator	a3ss	NA	0.43	0.46	0.72	0.57	-0.29	-0.11	-0.14	-0.26
a3ss@2:202098835:202131184:+|2:202098835:202131210:+.1	chr2:202098735-202131310	ENSG00000064012	CASP8	caspase 8, apoptosis-related cysteine peptidase	a3ss	NA	0.36	0.35	0.67	0.7	-0.31	-0.35	-0.34	-0.32
a3ss@2:220108661:220109951:-|2:220108365:220109951:-|2:220108353:220109951:-.1	chr2:220108253-220110051	ENSG00000163521	GLB1L	galactosidase, beta 1-like	a3ss	NA	0.53	0.51	0.35	0.36	0.18	0.15	0.17	0.16
a3ss@2:230670599:230672424:-|2:230670518:230672424:-.1	chr2:230670418-230672524	ENSG00000153827	TRIP12	thyroid hormone receptor interactor 12	a3ss	NA	0.48	0.53	0.53	0.67	-0.05	-0.14	-0.19	0
a3ss@2:231334813:231338039:+|2:231334813:231338099:+.1	chr2:231334713-231338199	ENSG00000067066	SP100	SP100 nuclear antigen	a3ss	NA	0.34	0.28	0.45	0.43	-0.11	-0.15	-0.09	-0.17
a3ss@2:24283796:24285889:+|2:24283796:24285934:+.1	chr2:24283696-24286034	ENSG00000205639	MFSD2B	major facilitator superfamily domain containing 2B	a3ss	NA	0.72	0.59	0.83	0.34	-0.11	0.25	0.38	-0.24
a3ss@2:27884468:27885046:-|2:27884255:27885046:-.1	chr2:27884155-27885146	ENSG00000119760	SUPT7L	suppressor of Ty 7 (S. cerevisiae)-like	a3ss	TRUE	0.36	0.32	0.24	0.28	0.12	0.04	0.08	0.08
a3ss@2:27884468:27885046:-|2:27884310:27885046:-|2:27884255:27885046:-|2:27884022:27885046:-.1	chr2:27883922-27885146	ENSG00000119760	SUPT7L	suppressor of Ty 7 (S. cerevisiae)-like	a3ss	TRUE	0.36	0.31	0.23	0.28	0.13	0.03	0.08	0.08
a3ss@2:86398468:86400773:-|2:86398459:86400773:-|2:86398435:86400773:-.1	chr2:86398335-86400873	ENSG00000132305	IMMT	inner membrane protein, mitochondrial	a3ss	NA	0.24	0.26	0.38	0.36	-0.14	-0.1	-0.12	-0.12
a3ss@2:97884983:97890543:+|2:97884983:97890546:+.1	chr2:97884883-97890646	ENSG00000135976	ANKRD36	ankyrin repeat domain 36	a3ss	NA	0.43	0.43	0.73	0.65	-0.3	-0.22	-0.22	-0.3
a3ss@20:18287037:18295713:+|20:18287037:18295716:+.1	chr20:18286937-18295816	ENSG00000125846	ZNF133	zinc finger protein 133	a3ss	NA	0.75	0.54	0.48	0.68	0.27	-0.14	0.07	0.06
a3ss@20:2819728:2819838:-|20:2819575:2819838:-.1	chr20:2819475-2819938	ENSG00000132635	PCED1A	PC-esterase domain containing 1A	a3ss	NA	0.86	0.91	0.91	0.79	-0.05	0.12	0.07	0
a3ss@20:32224514:32228147:+|20:32224514:32228150:+.1	chr20:32224414-32228250	ENSG00000078699	CBFA2T2	core-binding factor, runt domain, alpha subunit 2; translocated to, 2	a3ss	NA	0.88	0.83	0.59	0.69	0.29	0.14	0.19	0.24
a3ss@20:32957276:32981576:+|20:32957276:32981597:+.1	chr20:32957176-32981697	ENSG00000078747	ITCH	itchy E3 ubiquitin protein ligase	a3ss	NA	0.15	0.21	0.16	0.09	-0.01	0.12	0.06	0.05
a3ss@20:33609159:33622926:-|20:33609135:33622926:-.1	chr20:33609035-33623026	ENSG00000100991	TRPC4AP	transient receptor potential cation channel, subfamily C, member 4 associated protein	a3ss	NA	0.71	0.65	0.7	0.76	0.01	-0.11	-0.05	-0.05
a3ss@20:34053650:34053859:+|20:34053650:34053864:+.1	chr20:34053550-34053964	ENSG00000126001	CEP250	centrosomal protein 250kDa	a3ss	TRUE	0.13	0.19	0.06	0.17	0.07	0.02	-0.04	0.13
a3ss@20:34246936:34252682:-|20:34246904:34252682:-.1	chr20:34246804-34252782	ENSG00000244462	RBM12	RNA binding motif protein 12	a3ss	NA	0.82	0.86	0.93	0.89	-0.11	-0.03	-0.07	-0.07
a3ss@20:37161502:37163717:+|20:37161502:37163729:+.1	chr20:37161402-37163829	ENSG00000170471	RALGAPB	Ral GTPase activating protein, beta subunit (non-catalytic)	a3ss	NA	0.3	0.38	0.4	0.49	-0.1	-0.11	-0.19	-0.02
a3ss@20:42087149:42087793:+|20:42087149:42087945:+.1	chr20:42087049-42088045	ENSG00000124193	SRSF6	serine/arginine-rich splicing factor 6	a3ss	NA	0.89	0.94	0.63	0.62	0.26	0.32	0.27	0.31
a3ss@20:44472411:44472902:-|20:44472360:44472902:-.1	chr20:44472260-44473002	ENSG00000101473	ACOT8	acyl-CoA thioesterase 8	a3ss	TRUE	0.09	0.17	0.06	0.08	0.03	0.09	0.01	0.11
a3ss@21:34602521:34614145:+|21:34602521:34614191:+.1	chr21:34602421-34614291	ENSG00000159110	IFNAR2	interferon (alpha, beta and omega) receptor 2	a3ss	NA	0.27	0.2	0.41	0.37	-0.14	-0.17	-0.1	-0.21
a3ss@21:34633032:34634866:+|21:34633032:34635098:+.1	chr21:34632932-34635198	ENSG00000159110	IFNAR2	interferon (alpha, beta and omega) receptor 2	a3ss	NA	0.33	0.35	0.43	0.46	-0.1	-0.11	-0.13	-0.08
a3ss@21:47737262:47737926:-|21:47737182:47737926:-.1	chr21:47737082-47738026	ENSG00000160298	C21orf58	chromosome 21 open reading frame 58	a3ss	TRUE	0.21	0.31	0.32	0.46	-0.11	-0.15	-0.25	-0.01
a3ss@22:22049785:22051036:+|22:22049785:22051174:+.1	chr22:22049685-22051274	ENSG00000100023	PPIL2	peptidylprolyl isomerase (cyclophilin)-like 2	a3ss	NA	0.46	0.51	0.52	0.62	-0.06	-0.11	-0.16	-0.01
a3ss@22:32871385:32874968:+|22:32871385:32875120:+.1	chr22:32871285-32875220	ENSG00000100225	FBXO7	F-box protein 7	a3ss	TRUE	0.75	0.74	0.74	0.6	0.01	0.14	0.15	0
a3ss@22:39064137:39066772:+|22:39064137:39066889:+.1	chr22:39064037-39066989	ENSG00000100211	CBY1	chibby homolog 1 (Drosophila)	a3ss	TRUE	0.23	0.16	0.17	0.12	0.06	0.04	0.11	-0.01
a3ss@22:42564742:42565853:-|22:42564709:42565853:-.1	chr22:42564609-42565953	ENSG00000100207	TCF20	transcription factor 20 (AR1)	a3ss	NA	0.33	0.18	0.15	0.27	0.18	-0.09	0.06	0.03
a3ss@22:46742441:46746188:+|22:46742441:46746243:+|22:46742441:46746247:+.1	chr22:46742341-46746347	ENSG00000100416	TRMU	tRNA 5-methylaminomethyl-2-thiouridylate methyltransferase	a3ss	FALSE	0.36	0.27	0.46	0.52	-0.1	-0.25	-0.16	-0.19
a3ss@22:50181535:50187682:-|22:50181170:50187682:-|22:50181142:50187682:-.1	chr22:50181042-50187782	ENSG00000100425	BRD1	bromodomain containing 1	a3ss	FALSE	0.34	0.33	0.26	0.21	0.08	0.12	0.13	0.07
a3ss@22:50644949:50646917:+|22:50644949:50646965:+.1	chr22:50644849-50647065	ENSG00000073169	RP3-402G11.5	selenoprotein O	a3ss	NA	0.33	0.26	0.08	0.23	0.25	0.03	0.1	0.18
a3ss@22:51018259:51018403:-|22:51018231:51018403:-.1	chr22:51018131-51018503	ENSG00000100288	CHKB	choline kinase beta	a3ss	FALSE	0.7	0.63	0.81	0.85	-0.11	-0.22	-0.15	-0.18
a3ss@3:121438615:121441109:-|3:121438600:121441109:-.1	chr3:121438500-121441209	ENSG00000173230	GOLGB1	golgin B1	a3ss	NA	0.44	0.43	0.53	0.55	-0.09	-0.12	-0.11	-0.1
a3ss@3:132297900:132298336:-|3:132297725:132298336:-.1	chr3:132297625-132298436	ENSG00000240303	ACAD11	acyl-CoA dehydrogenase family, member 11	a3ss	TRUE	0.28	0.22	0.45	0.32	-0.17	-0.1	-0.04	-0.23
a3ss@3:133305566:133306003:+|3:133305566:133306740:+.1	chr3:133305466-133306840	ENSG00000091527	CDV3	CDV3 homolog (mouse)	a3ss	NA	0.54	0.55	0.38	0.41	0.16	0.14	0.13	0.17
a3ss@3:133371473:133372189:-|3:133371458:133372189:-|3:133371391:133372189:-.1	chr3:133371291-133372289	ENSG00000163781	TOPBP1	topoisomerase (DNA) II binding protein 1	a3ss	FALSE	0.41	0.39	0.59	0.51	-0.18	-0.12	-0.1	-0.2
a3ss@3:148885027:148885676:+|3:148885027:148885680:+.1	chr3:148884927-148885780	ENSG00000163755	HPS3	Hermansky-Pudlak syndrome 3	a3ss	TRUE	0.16	0.21	0.1	0.11	0.06	0.1	0.05	0.11
a3ss@3:149684373:149686145:-|3:149684051:149686145:-.1	chr3:149683951-149686245	ENSG00000070087	PFN2	profilin 2	a3ss	NA	0.24	0.27	0.1	0.17	0.14	0.1	0.07	0.17
a3ss@3:170585990:170586087:-|3:170585923:170586087:-.1	chr3:170585823-170586187	ENSG00000163584	RPL22L1	ribosomal protein L22-like 1	a3ss	TRUE	0.17	0.18	0.33	0.44	-0.16	-0.26	-0.27	-0.15
a3ss@3:184073632:184074781:-|3:184073566:184074781:-.1	chr3:184073466-184074881	ENSG00000114859	CLCN2	chloride channel, voltage-sensitive 2	a3ss	TRUE	0.14	0.18	0.04	0.04	0.1	0.14	0.1	0.14
a3ss@3:195709223:195710983:-|3:195709181:195710983:-.1	chr3:195709081-195711083	ENSG00000185485	SDHAP1	NA	a3ss	NA	0.02	0.03	0.01	0.13	0.01	-0.1	-0.11	0.02
a3ss@3:25686961:25705720:-|3:25686946:25705720:-.1	chr3:25686846-25705820	ENSG00000077097	TOP2B	topoisomerase (DNA) II beta 180kDa	a3ss	NA	0.1	0.15	0.09	0.26	0.01	-0.11	-0.16	0.06
a3ss@3:41280845:41281151:+|3:41280845:41281310:+.1	chr3:41280745-41281410	ENSG00000168036	CTNNB1	catenin (cadherin-associated protein), beta 1, 88kDa	a3ss	NA	0.71	0.71	0.41	0.45	0.3	0.26	0.26	0.3
a3ss@3:42605472:42610357:-|3:42605372:42610357:-.1	chr3:42605272-42610457	ENSG00000093183	SEC22C	SEC22 vesicle trafficking protein homolog C (S. cerevisiae)	a3ss	NA	0.4	0.36	0.14	0.28	0.26	0.08	0.12	0.22
a3ss@3:46717466:46717735:-|3:46717176:46717735:-.1	chr3:46717076-46717835	ENSG00000178038	ALS2CL	ALS2 C-terminal like	a3ss	TRUE	0.14	0.21	0.39	0.18	-0.25	0.03	-0.04	-0.18
a3ss@3:48505280:48505440:+|3:48505280:48505443:+.1	chr3:48505180-48505543	ENSG00000164053	ATRIP	ATR interacting protein	a3ss	NA	0.96	0.87	0.8	0.93	0.16	-0.06	0.03	0.07
a3ss@3:49053519:49053591:-|3:49053493:49053591:-.1	chr3:49053393-49053691	ENSG00000178149	DALRD3	DALR anticodon binding domain containing 3	a3ss	NA	0.75	0.61	0.73	0.8	0.02	-0.19	-0.05	-0.12
a3ss@3:49053519:49053591:-|3:49053513:49053591:-|3:49053493:49053591:-.1	chr3:49053393-49053691	ENSG00000178149	DALRD3	DALR anticodon binding domain containing 3	a3ss	NA	0.75	0.61	0.72	0.79	0.03	-0.18	-0.04	-0.11
a3ss@3:49397815:49398361:-|3:49397812:49398361:-.1	chr3:49397712-49398461	ENSG00000067560	RHOA	ras homolog family member A	a3ss	NA	0.84	0.8	0.73	0.69	0.11	0.11	0.15	0.07
a3ss@3:49462579:49462800:-|3:49462486:49462800:-.1	chr3:49462386-49462900	ENSG00000145029	NICN1	nicolin 1	a3ss	TRUE	0.42	0.42	0.31	0.21	0.11	0.21	0.21	0.11
a3ss@3:50333050:50336644:-|3:50332284:50336644:-.1	chr3:50332184-50336744	ENSG00000186792	HYAL3	hyaluronoglucosaminidase 3	a3ss	NA	0.57	0.6	0.88	0.55	-0.31	0.05	0.02	-0.28
a3ss@3:50388415:50388774:+|3:50388415:50388840:+.1	chr3:50388315-50388940	ENSG00000114395	CYB561D2	cytochrome b-561 domain containing 2	a3ss	NA	0.29	0.37	0.41	0.39	-0.12	-0.02	-0.1	-0.04
a3ss@3:56667994:56672734:-|3:56667871:56672734:-.1	chr3:56667771-56672834	ENSG00000163946	FAM208A	family with sequence similarity 208, member A	a3ss	NA	0.71	0.68	0.81	0.85	-0.1	-0.17	-0.14	-0.13
a3ss@4:104059609:104061413:-|4:104059606:104061413:-.1	chr4:104059506-104061513	ENSG00000138778	CENPE	centromere protein E, 312kDa	a3ss	NA	0.43	0.24	0.13	0.32	0.3	-0.08	0.11	0.11
a3ss@4:169317278:169321977:-|4:169317275:169321977:-.1	chr4:169317175-169322077	ENSG00000181381	DDX60L	DEAD (Asp-Glu-Ala-Asp) box polypeptide 60-like	a3ss	NA	0.47	0.67	0.76	0.68	-0.29	-0.01	-0.21	-0.09
a3ss@4:186066404:186066509:+|4:186066404:186066913:+.1	chr4:186066304-186067013	ENSG00000151729	SLC25A4	solute carrier family 25 (mitochondrial carrier; adenine nucleotide translocator), member 4	a3ss	TRUE	0.17	0.22	0.12	0.13	0.05	0.09	0.04	0.1
a3ss@4:57272867:57273816:-|4:57272784:57273816:-.1	chr4:57272684-57273916	ENSG00000128059	PPAT	phosphoribosyl pyrophosphate amidotransferase	a3ss	FALSE	0.92	0.94	0.78	0.86	0.14	0.08	0.06	0.16
a3ss@5:112200429:112203069:+|5:112200429:112203101:+.1	chr5:112200329-112203201	ENSG00000153037	SRP19	signal recognition particle 19kDa	a3ss	NA	0.13	0.19	0.07	0.12	0.06	0.07	0.01	0.12
a3ss@5:114917012:114952015:-|5:114916894:114952015:-.1	chr5:114916794-114952115	ENSG00000243414	TICAM2	toll-like receptor adaptor molecule 2	a3ss	NA	0.37	0.36	0.76	0.67	-0.39	-0.31	-0.3	-0.4
a3ss@5:131554361:131562779:-|5:131554337:131562779:-.1	chr5:131554237-131562879	ENSG00000072682	P4HA2	prolyl 4-hydroxylase, alpha polypeptide II	a3ss	NA	0.13	0.04	0.02	0.1	0.11	-0.06	0.03	0.02
a3ss@5:139815842:139818046:+|5:139815842:139818079:+|5:139815842:139818088:+.1	chr5:139815742-139818188	ENSG00000131503	ANKHD1	ankyrin repeat and KH domain containing 1	a3ss	NA	0.67	0.62	0.84	0.74	-0.17	-0.12	-0.07	-0.22
a3ss@5:154214679:154217691:-|5:154214494:154217691:-.1	chr5:154214394-154217791	ENSG00000170271	C5orf4	chromosome 5 open reading frame 4	a3ss	TRUE	0.8	0.95	0.6	0.51	0.2	0.44	0.29	0.35
a3ss@5:157216575:157218711:-|5:157216521:157218711:-.1	chr5:157216421-157218811	ENSG00000113282	CLINT1	clathrin interactor 1	a3ss	NA	0.24	0.33	0.4	0.34	-0.16	-0.01	-0.1	-0.07
a3ss@5:37157970:37158326:-|5:37157916:37158326:-.1	chr5:37157816-37158426	ENSG00000197603	C5orf42	chromosome 5 open reading frame 42	a3ss	NA	0.74	0.76	0.94	0.83	-0.2	-0.07	-0.09	-0.18
a3ss@5:65459750:65460436:+|5:65459750:65460611:+.1	chr5:65459650-65460711	ENSG00000153914	SREK1	splicing regulatory glutamine/lysine-rich protein 1	a3ss	TRUE	0.21	0.17	0.27	0.22	-0.06	-0.05	-0.01	-0.1
a3ss@5:78937019:78938655:+|5:78937019:78938667:+.1	chr5:78936919-78938767	ENSG00000164329	PAPD4	PAP associated domain containing 4	a3ss	NA	0.49	0.5	0.66	0.61	-0.17	-0.11	-0.12	-0.16
a3ss@5:869519:870588:-|5:869509:870588:-.1	chr5:869409-870688	ENSG00000028310	BRD9	bromodomain containing 9	a3ss	NA	0.3	0.41	0.74	0.5	-0.44	-0.09	-0.2	-0.33
a3ss@5:886882:887476:-|5:886822:887476:-.1	chr5:886722-887576	ENSG00000028310	BRD9	bromodomain containing 9	a3ss	NA	0.14	0.12	0.27	0.21	-0.13	-0.09	-0.07	-0.15
a3ss@6:109768780:109768884:-|6:109768643:109768884:-.1	chr6:109768543-109768984	ENSG00000135596	MICAL1	microtubule associated monoxygenase, calponin and LIM domain containing 1	a3ss	TRUE	0.35	0.14	0.13	0.21	0.22	-0.07	0.14	0.01
a3ss@6:159084410:159086419:+|6:159084410:159086427:+.1	chr6:159084310-159086527	ENSG00000164674	SYTL3	synaptotagmin-like 3	a3ss	TRUE	0.1	0.05	0.04	0.3	0.06	-0.25	-0.2	0.01
a3ss@6:163984751:163985699:+|6:163984751:163986978:+.1	chr6:163984651-163987078	ENSG00000112531	QKI	QKI, KH domain containing, RNA binding	a3ss	NA	0.5	0.4	0.18	0.31	0.32	0.09	0.19	0.22
a3ss@6:163984751:163985699:+|6:163984751:163986978:+|6:163984751:163987753:+.1	chr6:163984651-163987853	ENSG00000112531	QKI	QKI, KH domain containing, RNA binding	a3ss	TRUE	0.27	0.23	0.11	0.18	0.16	0.05	0.09	0.12
a3ss@6:24412623:24415244:+|6:24412623:24415261:+.1	chr6:24412523-24415361	ENSG00000124532	MRS2	MRS2 magnesium homeostasis factor homolog (S. cerevisiae)	a3ss	TRUE	0.25	0.2	0.07	0.05	0.18	0.15	0.2	0.13
a3ss@6:25106757:25108804:-|6:25106722:25108804:-.1	chr6:25106622-25108904	ENSG00000168405	CMAHP	cytidine monophospho-N-acetylneuraminic acid hydroxylase, pseudogene	a3ss	TRUE	0.22	0.15	0.02	0.15	0.2	0	0.07	0.13
a3ss@6:26365580:26368203:+|6:26365580:26368218:+.1	chr6:26365480-26368318	ENSG00000186470	BTN3A2	butyrophilin, subfamily 3, member A2	a3ss	NA	0.03	0.12	0.08	0.15	-0.05	-0.03	-0.12	0.04
a3ss@6:30168915:30172433:-|6:30168900:30172433:-|6:30168860:30172433:-.1	chr6:30168760-30172533	ENSG00000234127	TRIM26	tripartite motif containing 26	a3ss	NA	0.73	0.57	0.77	0.86	-0.04	-0.29	-0.13	-0.2
a3ss@6:32134782:32134864:+|6:32134782:32134880:+|6:32134782:32134924:+.1	chr6:32134682-32135024	ENSG00000241404	EGFL8	EGF-like-domain, multiple 8	a3ss	FALSE	0.52	0.58	0.84	0.72	-0.32	-0.14	-0.2	-0.26
a3ss@6:32134782:32134864:+|6:32134782:32134924:+.1	chr6:32134682-32135024	ENSG00000241404	EGFL8	EGF-like-domain, multiple 8	a3ss	NA	0.59	0.66	0.9	0.79	-0.31	-0.13	-0.2	-0.24
a3ss@6:41058048:41059267:+|6:41058048:41059285:+.1	chr6:41057948-41059385	ENSG00000001167	NFYA	nuclear transcription factor Y, alpha	a3ss	NA	0.67	0.63	0.79	0.6	-0.12	0.03	0.07	-0.16
a3ss@6:7595334:7599906:+|6:7595334:7601569:+.1	chr6:7595234-7601669	ENSG00000168566	SNRNP48	small nuclear ribonucleoprotein 48kDa (U11/U12)	a3ss	TRUE	0.2	0.24	0.08	0.19	0.12	0.05	0.01	0.16
a3ss@7:100075930:100076417:-|7:100075827:100076417:-|7:100075085:100076417:-.1	chr7:100074985-100076517	ENSG00000166925	TSC22D4	TSC22 domain family, member 4	a3ss	NA	0.67	0.59	0.72	0.67	-0.05	-0.08	0	-0.13
a3ss@7:129008392:129019479:+|7:129008392:129019482:+.1	chr7:129008292-129019582	ENSG00000158467	AHCYL2	adenosylhomocysteinase-like 2	a3ss	NA	0.47	0.24	0.21	0.27	0.26	-0.03	0.2	0.03
a3ss@7:139299239:139305147:-|7:139299158:139305147:-.1	chr7:139299058-139305247	ENSG00000064393	HIPK2	homeodomain interacting protein kinase 2	a3ss	NA	0.47	0.4	0.47	0.59	0	-0.19	-0.12	-0.07
a3ss@7:140710460:140714711:-|7:140710417:140714711:-.1	chr7:140710317-140714811	ENSG00000090263	MRPS33	mitochondrial ribosomal protein S33	a3ss	NA	0.78	0.77	0.84	0.89	-0.06	-0.12	-0.11	-0.07
a3ss@7:150066957:150067803:+|7:150066957:150067849:+.1	chr7:150066857-150067949	ENSG00000214022	REPIN1	replication initiator 1	a3ss	NA	0.18	0.17	0.11	0.33	0.07	-0.16	-0.15	0.06
a3ss@7:155499762:155503867:+|7:155499762:155503897:+.1	chr7:155499662-155503997	ENSG00000184863	RBM33	RNA binding motif protein 33	a3ss	NA	0.23	0.16	0.4	0.3	-0.17	-0.14	-0.07	-0.24
a3ss@7:156468557:156468989:+|7:156468557:156469113:+.1	chr7:156468457-156469213	ENSG00000105982	RNF32	ring finger protein 32	a3ss	NA	0.53	0.66	0.29	0.45	0.24	0.21	0.08	0.37
a3ss@7:158468348:158472652:-|7:158468308:158472652:-.1	chr7:158468208-158472752	ENSG00000146918	NCAPG2	non-SMC condensin II complex, subunit G2	a3ss	FALSE	0.9	0.86	0.98	0.94	-0.08	-0.08	-0.04	-0.12
a3ss@7:23562051:23571408:-|7:23561459:23571408:-.1	chr7:23561359-23571508	ENSG00000164548	TRA2A	transformer 2 alpha homolog (Drosophila)	a3ss	TRUE	0.36	0.41	0.37	0.29	-0.01	0.12	0.07	0.04
a3ss@7:30603614:30608449:-|7:30603509:30608449:-.1	chr7:30603409-30608549	ENSG00000196295	AC005154.6	NA	a3ss	NA	0.73	0.88	0.87	0.94	-0.14	-0.06	-0.21	0.01
a3ss@7:33075600:33102180:-|7:33075597:33102180:-.1	chr7:33075497-33102280	ENSG00000122643	NT5C3	5'-nucleotidase, cytosolic III	a3ss	NA	0.92	0.92	0.94	0.77	-0.02	0.15	0.15	-0.02
a3ss@7:44113832:44113997:-|7:44113819:44113997:-.1	chr7:44113719-44114097	ENSG00000122678	POLM	polymerase (DNA directed), mu	a3ss	FALSE	0.54	0.63	0.83	0.72	-0.29	-0.09	-0.18	-0.2
a3ss@7:44796138:44796546:+|7:44796138:44796574:+|7:44796138:44796642:+.1	chr7:44796038-44796742	ENSG00000122515	ZMIZ2	zinc finger, MIZ-type containing 2	a3ss	FALSE	0.54	0.58	0.7	0.76	-0.16	-0.18	-0.22	-0.12
a3ss@7:51093069:51094243:-|7:51092928:51094243:-.1	chr7:51092828-51094343	ENSG00000106078	COBL	cordon-bleu WH2 repeat protein	a3ss	NA	0.61	0.52	0.71	0.61	-0.1	-0.09	0	-0.19
a3ss@7:5781446:5792477:-|7:5781275:5792477:-.1	chr7:5781175-5792577	ENSG00000011275	RNF216	ring finger protein 216	a3ss	NA	0.21	0.17	0.42	0.33	-0.21	-0.16	-0.12	-0.25
a3ss@7:6630106:6631277:+|7:6630106:6631334:+|7:6630106:6631384:+.1	chr7:6630006-6631484	ENSG00000146576	C7orf26	chromosome 7 open reading frame 26	a3ss	FALSE	0.74	0.76	0.87	0.89	-0.13	-0.13	-0.15	-0.11
a3ss@7:74312628:74313593:+|7:74312628:74313768:+.1	chr7:74312528-74313868	ENSG00000123965	PMS2P5	NA	a3ss	TRUE	0.16	0.05	0.13	0.32	0.03	-0.27	-0.16	-0.08
a3ss@7:75144109:75145043:-|7:75144104:75145043:-.1	chr7:75144004-75145143	ENSG00000127957	PMS2P3	NA	a3ss	NA	0.92	0.83	0.71	0.83	0.21	0	0.09	0.12
a3ss@7:75155336:75156895:-|7:75155292:75156895:-.1	chr7:75155192-75156995	ENSG00000127957	PMS2P3	NA	a3ss	NA	0.46	0.58	0.22	0.43	0.24	0.15	0.03	0.36
a3ss@7:87485704:87487946:-|7:87485666:87487946:-.1	chr7:87485566-87488046	ENSG00000075303	SLC25A40	solute carrier family 25, member 40	a3ss	TRUE	0.16	0.21	0.07	0.12	0.09	0.09	0.04	0.14
a3ss@7:94898019:94898519:+|7:94898019:94898573:+.1	chr7:94897919-94898673	ENSG00000158528	PPP1R9A	protein phosphatase 1, regulatory subunit 9A	a3ss	NA	0.57	0.53	0.84	0.75	-0.27	-0.22	-0.18	-0.31
a3ss@7:95041091:95041624:-|7:95041055:95041624:-.1	chr7:95040955-95041724	ENSG00000105854	PON2	paraoxonase 2	a3ss	NA	0.61	0.62	0.78	0.78	-0.17	-0.16	-0.17	-0.16
a3ss@7:99102356:99103566:+|7:99102356:99103628:+.1	chr7:99102256-99103728	ENSG00000196652	ZKSCAN5	zinc finger with KRAB and SCAN domains 5	a3ss	NA	0.2	0.53	0.43	0.53	-0.23	0	-0.33	0.1
a3ss@8:126104200:126114256:+|8:126104200:126114293:+.1	chr8:126104100-126114393	ENSG00000156831	NSMCE2	non-SMC element 2, MMS21 homolog (S. cerevisiae)	a3ss	NA	0.06	0.06	0.16	0.17	-0.1	-0.11	-0.11	-0.1
a3ss@8:129082518:129108764:+|8:129082518:129108767:+.1	chr8:129082418-129108867	ENSG00000249859	PVT1	NA	a3ss	NA	0.92	0.79	0.91	0.97	0.01	-0.18	-0.05	-0.12
a3ss@8:143783131:143784262:+|8:143783131:143784509:+|8:143783131:143784541:+.1	chr8:143783031-143784641	ENSG00000160886	LY6K	lymphocyte antigen 6 complex, locus K	a3ss	NA	0.35	0.3	0.22	0.27	0.13	0.03	0.08	0.08
a3ss@8:146029152:146029510:+|8:146029152:146029531:+.1	chr8:146029052-146029631	ENSG00000197363	ZNF517	zinc finger protein 517	a3ss	NA	0.78	0.73	0.84	0.9	-0.06	-0.17	-0.12	-0.11
a3ss@8:23423849:23425772:+|8:23423849:23425835:+.1	chr8:23423749-23425935	ENSG00000147454	SLC25A37	solute carrier family 25 (mitochondrial iron transporter), member 37	a3ss	TRUE	0.52	0.72	0.36	0.53	0.16	0.19	-0.01	0.36
a3ss@8:38853313:38853732:-|8:38852924:38853732:-.1	chr8:38852824-38853832	ENSG00000169490	TM2D2	TM2 domain containing 2	a3ss	TRUE	0.25	0.25	0.38	0.26	-0.13	-0.01	-0.01	-0.13
a3ss@8:38853313:38853732:-|8:38853212:38853732:-|8:38852924:38853732:-.1	chr8:38852824-38853832	ENSG00000169490	TM2D2	TM2 domain containing 2	a3ss	TRUE	0.23	0.22	0.34	0.21	-0.11	0.01	0.02	-0.12
a3ss@8:57127226:57128948:+|8:57127226:57128992:+.1	chr8:57127126-57129092	ENSG00000170791	CHCHD7	coiled-coil-helix-coiled-coil-helix domain containing 7	a3ss	NA	0.16	0.2	0.39	0.35	-0.23	-0.15	-0.19	-0.19
a3ss@9:104161471:104162208:+|9:104161471:104162211:+.1	chr9:104161371-104162311	ENSG00000136870	ZNF189	zinc finger protein 189	a3ss	NA	0.96	0.86	0.68	0.92	0.28	-0.06	0.04	0.18
a3ss@9:111693481:111696144:-|9:111693336:111696144:-.1	chr9:111693236-111696244	ENSG00000070061	IKBKAP	inhibitor of kappa light polypeptide gene enhancer in B-cells, kinase complex-associated protein	a3ss	NA	0.41	0.46	0.53	0.69	-0.12	-0.23	-0.28	-0.07
a3ss@9:111693481:111696144:-|9:111693479:111696144:-|9:111693336:111696144:-.1	chr9:111693236-111696244	ENSG00000070061	IKBKAP	inhibitor of kappa light polypeptide gene enhancer in B-cells, kinase complex-associated protein	a3ss	NA	0.39	0.43	0.51	0.64	-0.12	-0.21	-0.25	-0.08
a3ss@9:116035718:116037662:-|9:116035690:116037662:-.1	chr9:116035590-116037762	ENSG00000119321	FKBP15	FK506 binding protein 15, 133kDa	a3ss	NA	0.92	0.92	0.78	0.87	0.14	0.05	0.05	0.14
a3ss@9:123367919:123370019:-|9:123367916:123370019:-.1	chr9:123367816-123370119	ENSG00000106780	MEGF9	multiple EGF-like-domains 9	a3ss	NA	0.94	0.99	0.95	0.88	-0.01	0.11	0.06	0.04
a3ss@9:124533003:124534886:+|9:124533003:124534952:+.1	chr9:124532903-124535052	ENSG00000136848	DAB2IP	DAB2 interacting protein	a3ss	NA	0.53	0.6	0.72	0.67	-0.19	-0.07	-0.14	-0.12
a3ss@9:131773044:131774515:-|9:131772972:131774515:-.1	chr9:131772872-131774615	ENSG00000148341	SH3GLB2	SH3-domain GRB2-like endophilin B2	a3ss	NA	0.25	0.28	0.1	0.11	0.15	0.17	0.14	0.18
a3ss@9:134020141:134021516:+|9:134020141:134021549:+.1	chr9:134020041-134021649	ENSG00000126883	NUP214	nucleoporin 214kDa	a3ss	NA	0.82	0.85	0.58	0.77	0.24	0.08	0.05	0.27
a3ss@9:135985108:135985683:-|9:135985072:135985683:-.1	chr9:135984972-135985783	ENSG00000160271	RALGDS	ral guanine nucleotide dissociation stimulator	a3ss	NA	0.63	0.61	0.47	0.59	0.16	0.02	0.04	0.14
a3ss@9:138387461:138390431:-|9:138387415:138390431:-.1	chr9:138387315-138390531	ENSG00000160345	C9orf116	chromosome 9 open reading frame 116	a3ss	NA	0.7	0.83	0.92	0.89	-0.22	-0.06	-0.19	-0.09
a3ss@9:140100364:140100684:+|9:140100364:140100733:+.1	chr9:140100264-140100833	ENSG00000188566	NDOR1	NADPH dependent diflavin oxidoreductase 1	a3ss	FALSE	0.77	0.68	0.66	0.84	0.11	-0.16	-0.07	0.02
a3ss@9:18492:19026:-|9:18479:19026:-.1	chr9:18379-19126	ENSG00000181404	XXyac-YRM2039.2	NA	a3ss	FALSE	0.15	0.1	0.19	0.02	-0.04	0.08	0.13	-0.09
a3ss@9:35075751:35075959:-|9:35075726:35075959:-.1	chr9:35075626-35076059	ENSG00000221829	FANCG	Fanconi anemia, complementation group G	a3ss	FALSE	0.69	0.79	0.83	0.88	-0.14	-0.09	-0.19	-0.04
a3ss@9:35606980:35607444:+|9:35606980:35607579:+.1	chr9:35606880-35607679	ENSG00000107140	TESK1	testis-specific kinase 1	a3ss	NA	0.18	0.28	0.1	0.12	0.08	0.16	0.06	0.18
a3ss@9:91934712:91940342:+|9:91934712:91940463:+.1	chr9:91934612-91940563	ENSG00000187742	SECISBP2	SECIS binding protein 2	a3ss	FALSE	0.53	0.52	0.66	0.67	-0.13	-0.15	-0.14	-0.14
a3ss@9:95063092:95063833:-|9:95062298:95063833:-.1	chr9:95062198-95063933	ENSG00000198000	NOL8	nucleolar protein 8	a3ss	TRUE	0.34	0.32	0.24	0.2	0.1	0.12	0.14	0.08
a3ss@X:133906313:133915851:-|X:133905384:133915851:-.1	chrX:133905284-133915951	ENSG00000156504	FAM122B	family with sequence similarity 122B	a3ss	NA	0.81	0.78	0.66	0.51	0.15	0.27	0.3	0.12
a3ss@X:134425553:134426207:-|X:134425489:134426207:-.1	chrX:134425389-134426307	ENSG00000186376	ZNF75D	zinc finger protein 75D	a3ss	TRUE	0.1	0.08	0.28	0.18	-0.18	-0.1	-0.08	-0.2
a3ss@X:13769487:13770823:+|X:13769487:13771487:+.1	chrX:13769387-13771587	ENSG00000046651	OFD1	oral-facial-digital syndrome 1	a3ss	TRUE	0.69	0.75	0.54	0.42	0.15	0.33	0.27	0.21
a3ss@X:147024846:147026389:+|X:147024846:147026425:+|X:147024846:147026464:+.1	chrX:147024746-147026564	ENSG00000102081	FMR1	fragile X mental retardation 1	a3ss	NA	0.55	0.66	0.68	0.72	-0.13	-0.06	-0.17	-0.02
a3ss@X:23851729:23858430:-|X:23851627:23858430:-.1	chrX:23851527-23858530	ENSG00000184831	APOO	apolipoprotein O	a3ss	NA	0.23	0.28	0.4	0.47	-0.17	-0.19	-0.24	-0.12
a3ss@X:39923205:39923589:-|X:39923103:39923589:-.1	chrX:39923003-39923689	ENSG00000183337	BCOR	BCL6 corepressor	a3ss	NA	0.21	0.13	0.24	0.26	-0.03	-0.13	-0.05	-0.11
a3ss@X:48762759:48763669:-|X:48762169:48763669:-.1	chrX:48762069-48763769	ENSG00000102100	SLC35A2	solute carrier family 35 (UDP-galactose transporter), member A2	a3ss	NA	0.81	0.84	0.73	0.77	0.08	0.07	0.04	0.11
a3ss@X:53112487:53113714:+|X:53112487:53113727:+.1	chrX:53112387-53113827	ENSG00000184205	TSPYL2	TSPY-like 2	a3ss	TRUE	0.59	0.5	0.42	0.44	0.17	0.06	0.15	0.08
a3ss@X:70753186:70756028:+|X:70753186:70756058:+.1	chrX:70753086-70756158	ENSG00000147162	OGT	O-linked N-acetylglucosamine (GlcNAc) transferase	a3ss	NA	0.69	0.7	0.89	0.88	-0.2	-0.18	-0.19	-0.19
a3ss@X:99899512:99901190:+|X:99899512:99901319:+.1	chrX:99899412-99901419	ENSG00000102359	SRPX2	sushi-repeat containing protein, X-linked 2	a3ss	NA	0.67	0.73	0.92	0.9	-0.25	-0.17	-0.23	-0.19
a5ss@1:114375760:114376931:-|1:114375760:114377015:-.1	chr1:114375660-114377115	ENSG00000134242	PTPN22	protein tyrosine phosphatase, non-receptor type 22 (lymphoid)	a5ss	NA	0.9	0.83	0.96	0.93	-0.06	-0.1	-0.03	-0.13
a5ss@1:1274033:1274667:-|1:1274033:1274742:-.1	chr1:1273933-1274842	ENSG00000107404	DVL1	dishevelled, dsh homolog 1 (Drosophila)	a5ss	NA	0.35	0.41	0.3	0.31	0.05	0.1	0.04	0.11
a5ss@1:151028469:151029127:-|1:151028469:151029132:-.1	chr1:151028369-151029232	ENSG00000197622	CDC42SE1	CDC42 small effector 1	a5ss	NA	0.73	0.44	0.45	0.36	0.28	0.08	0.37	-0.01
a5ss@1:153941175:153941406:+|1:153941115:153941406:+.1	chr1:153941015-153941506	ENSG00000143578	CREB3L4	cAMP responsive element binding protein 3-like 4	a5ss	NA	0.62	0.53	0.69	0.62	-0.07	-0.09	0	-0.16
a5ss@1:153941175:153941406:+|1:153941158:153941406:+|1:153941115:153941406:+.1	chr1:153941015-153941506	ENSG00000143578	CREB3L4	cAMP responsive element binding protein 3-like 4	a5ss	FALSE	0.62	0.52	0.68	0.6	-0.06	-0.08	0.02	-0.16
a5ss@1:155581146:155581340:+|1:155581082:155581340:+.1	chr1:155580982-155581440	ENSG00000125459	MSTO1	misato homolog 1 (Drosophila)	a5ss	TRUE	0.13	0.13	0.24	0.15	-0.11	-0.02	-0.02	-0.11
a5ss@1:156704285:156705517:+|1:156703844:156705517:+.1	chr1:156703744-156705617	ENSG00000143303	RRNAD1	ribosomal RNA adenine dimethylase domain containing 1	a5ss	NA	0.77	0.67	0.57	0.56	0.2	0.11	0.21	0.1
a5ss@1:1577362:1577708:-|1:1577362:1577747:-.1	chr1:1577262-1577847	ENSG00000248333	CDK11B	cyclin-dependent kinase 11B	a5ss	NA	0.01	0.01	0.01	0.15	0	-0.14	-0.14	0
a5ss@1:170508712:170511632:+|1:170508708:170511632:+.1	chr1:170508608-170511732	ENSG00000120370	GORAB	golgin, RAB6-interacting	a5ss	TRUE	0.28	0.18	0.44	0.29	-0.16	-0.11	-0.01	-0.26
a5ss@1:17368:17526:-|1:17368:17606:-.1	chr1:17268-17706	ENSG00000227232	WASH7P	NA	a5ss	NA	0.49	0.47	0.35	0.53	0.14	-0.06	-0.04	0.12
a5ss@1:203765729:203770703:+|1:203765624:203770703:+.1	chr1:203765524-203770803	ENSG00000058673	ZC3H11A	zinc finger CCCH-type containing 11A	a5ss	NA	0.49	0.41	0.12	0.31	0.37	0.1	0.18	0.29
a5ss@1:203765729:203770703:+|1:203765624:203770703:+|1:203765482:203770703:+.1	chr1:203765382-203770803	ENSG00000058673	ZC3H11A	zinc finger CCCH-type containing 11A	a5ss	NA	0.37	0.36	0.12	0.23	0.25	0.13	0.14	0.24
a5ss@1:209603845:209605088:+|1:209603821:209605088:+.1	chr1:209603721-209605188	ENSG00000230937	MIR205HG	NA	a5ss	NA	0.44	0.42	0.38	0.31	0.06	0.11	0.13	0.04
a5ss@1:29638065:29638155:+|1:29638056:29638155:+.1	chr1:29637956-29638255	ENSG00000060656	PTPRU	protein tyrosine phosphatase, receptor type, U	a5ss	NA	0.58	0.78	0.55	0.55	0.03	0.23	0.03	0.23
a5ss@1:33099711:33100303:-|1:33099711:33100369:-.1	chr1:33099611-33100469	ENSG00000176261	ZBTB8OS	zinc finger and BTB domain containing 8 opposite strand	a5ss	NA	0.12	0.18	0.05	0.15	0.07	0.03	-0.03	0.13
a5ss@1:33798005:33799691:-|1:33798005:33799786:-.1	chr1:33797905-33799886	ENSG00000134686	PHC2	polyhomeotic homolog 2 (Drosophila)	a5ss	FALSE	0.65	0.69	0.81	0.72	-0.16	-0.03	-0.07	-0.12
a5ss@1:40029413:40030095:-|1:40029413:40030143:-.1	chr1:40029313-40030243	ENSG00000090621	PABPC4	poly(A) binding protein, cytoplasmic 4 (inducible form)	a5ss	NA	0.64	0.59	0.72	0.69	-0.08	-0.1	-0.05	-0.13
a5ss@1:40029594:40030095:-|1:40029594:40030143:-.1	chr1:40029494-40030243	ENSG00000090621	PABPC4	poly(A) binding protein, cytoplasmic 4 (inducible form)	a5ss	NA	0.52	0.53	0.65	0.61	-0.13	-0.08	-0.09	-0.12
a5ss@1:40204603:40205837:+|1:40204595:40205837:+.1	chr1:40204495-40205937	ENSG00000084072	PPIE	peptidylprolyl isomerase E (cyclophilin E)	a5ss	FALSE	0.64	0.74	0.64	0.78	0	-0.04	-0.14	0.1
a5ss@1:70820891:70832127:+|1:70820794:70832127:+|1:70820790:70832127:+.1	chr1:70820690-70832227	ENSG00000197568	HHLA3	HERV-H LTR-associating 3	a5ss	NA	0.22	0.26	0.22	0.15	0	0.11	0.07	0.04
a5ss@10:100150511:100150628:-|10:100150511:100150767:-.1	chr10:100150411-100150867	ENSG00000119943	PYROXD2	pyridine nucleotide-disulphide oxidoreductase domain 2	a5ss	TRUE	0.14	0.19	0.04	0.16	0.1	0.03	-0.02	0.15
a5ss@10:38384561:38384672:+|10:38384557:38384672:+.1	chr10:38384457-38384772	ENSG00000075407	ZNF37A	zinc finger protein 37A	a5ss	NA	0.3	0.46	0.46	0.18	-0.16	0.28	0.12	0
a5ss@10:38384561:38384672:+|10:38384557:38384672:+|10:38384540:38384672:+.1	chr10:38384440-38384772	ENSG00000075407	ZNF37A	zinc finger protein 37A	a5ss	NA	0.3	0.43	0.35	0.14	-0.05	0.29	0.16	0.08
a5ss@10:73983901:73992759:+|10:73983814:73992759:+.1	chr10:73983714-73992859	ENSG00000166295	ANAPC16	anaphase promoting complex subunit 16	a5ss	TRUE	0.17	0.22	0.21	0.32	-0.04	-0.1	-0.15	0.01
a5ss@10:74987942:74990180:+|10:74987918:74990180:+.1	chr10:74987818-74990280	ENSG00000138286	FAM149B1	family with sequence similarity 149, member B1	a5ss	NA	0.59	0.63	0.75	0.7	-0.16	-0.07	-0.11	-0.12
a5ss@10:75583842:75585037:-|10:75583842:75585079:-.1	chr10:75583742-75585179	ENSG00000148660	CAMK2G	calcium/calmodulin-dependent protein kinase II gamma	a5ss	NA	0.6	0.49	0.59	0.63	0.01	-0.14	-0.03	-0.1
a5ss@11:117070545:117073718:+|11:117070148:117073718:+.1	chr11:117070048-117073818	ENSG00000149591	TAGLN	transgelin	a5ss	NA	0.64	0.85	0.12	0.33	0.52	0.52	0.31	0.73
a5ss@11:118869876:118881474:+|11:118869819:118881474:+.1	chr11:118869719-118881574	ENSG00000186166	CCDC84	coiled-coil domain containing 84	a5ss	TRUE	0.35	0.3	0.1	0.18	0.25	0.12	0.17	0.2
a5ss@11:134122810:134123121:-|11:134122810:134123193:-.1	chr11:134122710-134123293	ENSG00000151500	THYN1	thymocyte nuclear protein 1	a5ss	NA	0.21	0.31	0.24	0.18	-0.03	0.13	0.03	0.07
a5ss@11:17308264:17316871:+|11:17308260:17316871:+.1	chr11:17308160-17316971	ENSG00000070081	NUCB2	nucleobindin 2	a5ss	NA	0.55	0.43	0.71	0.54	-0.16	-0.11	0.01	-0.28
a5ss@11:428826:429474:-|11:428826:429570:-.1	chr11:428726-429670	ENSG00000185101	ANO9	anoctamin 9	a5ss	TRUE	0.31	0.28	0.18	0.24	0.13	0.04	0.07	0.1
a5ss@12:109915914:109919442:+|12:109915581:109919442:+|12:109915569:109919442:+.1	chr12:109915469-109919542	ENSG00000151148	UBE3B	ubiquitin protein ligase E3B	a5ss	NA	0.34	0.39	0.3	0.45	0.04	-0.06	-0.11	0.09
a5ss@12:111908546:111923069:-|12:111908546:111923075:-.1	chr12:111908446-111923175	ENSG00000204842	ATXN2	ataxin 2	a5ss	NA	0.52	0.39	0.5	0.51	0.02	-0.12	0.01	-0.11
a5ss@12:118455858:118456877:+|12:118455620:118456877:+.1	chr12:118455520-118456977	ENSG00000111445	RFC5	replication factor C (activator 1) 5, 36.5kDa	a5ss	NA	0.12	0.22	0.1	0.1	0.02	0.12	0.02	0.12
a5ss@12:39713815:39715150:-|12:39713815:39716470:-.1	chr12:39713715-39716570	ENSG00000139116	KIF21A	kinesin family member 21A	a5ss	TRUE	0.24	0.22	0.4	0.3	-0.16	-0.08	-0.06	-0.18
a5ss@12:4662313:4668023:+|12:4662255:4668023:+.1	chr12:4662155-4668123	ENSG00000111247	RAD51AP1	RAD51 associated protein 1	a5ss	NA	0.91	0.82	0.85	0.65	0.06	0.17	0.26	-0.03
a5ss@12:50474510:50474885:+|12:50474372:50474885:+.1	chr12:50474272-50474985	ENSG00000110881	ASIC1	acid-sensing (proton-gated) ion channel 1	a5ss	NA	0.15	0.1	0.05	0.04	0.1	0.06	0.11	0.05
a5ss@12:53931336:53936871:-|12:53931336:53937081:-|12:53931336:53937114:-.1	chr12:53931236-53937214	ENSG00000170653	ATF7	activating transcription factor 7	a5ss	TRUE	0.39	0.35	0.58	0.61	-0.19	-0.26	-0.22	-0.23
a5ss@12:54677018:54677596:+|12:54677015:54677596:+.1	chr12:54676915-54677696	ENSG00000135486	HNRNPA1	heterogeneous nuclear ribonucleoprotein A1	a5ss	NA	0.63	0.57	0.73	0.67	-0.1	-0.1	-0.04	-0.16
a5ss@12:56093773:56094350:-|12:56093773:56094683:-.1	chr12:56093673-56094783	ENSG00000135424	ITGA7	integrin, alpha 7	a5ss	TRUE	0.61	0.47	0.47	0.29	0.14	0.18	0.32	0
a5ss@12:57463089:57464457:-|12:57463089:57464603:-.1	chr12:57462989-57464703	ENSG00000166881	TMEM194A	transmembrane protein 194A	a5ss	FALSE	0.9	0.76	0.41	0.77	0.49	-0.01	0.13	0.35
a5ss@12:69004832:69018451:+|12:69004823:69018451:+|12:69004808:69018451:+.1	chr12:69004708-69018551	ENSG00000127314	RAP1B	RAP1B, member of RAS oncogene family	a5ss	NA	0.4	0.29	0.13	0.45	0.27	-0.16	-0.05	0.16
a5ss@12:7086424:7086525:-|12:7086424:7086529:-.1	chr12:7086324-7086629	ENSG00000111684	LPCAT3	lysophosphatidylcholine acyltransferase 3	a5ss	TRUE	0.08	0.13	0.02	0.08	0.06	0.05	0	0.11
a5ss@13:41937009:41941575:+|13:41936295:41941575:+.1	chr13:41936195-41941675	ENSG00000172766	NAA16	N(alpha)-acetyltransferase 16, NatA auxiliary subunit	a5ss	TRUE	0.21	0.24	0.1	0.12	0.11	0.12	0.09	0.14
a5ss@14:21698525:21699117:-|14:21698525:21699152:-|14:21698525:21699156:-.1	chr14:21698425-21699256	ENSG00000092199	HNRNPC	heterogeneous nuclear ribonucleoprotein C (C1/C2)	a5ss	FALSE	0.31	0.34	0.24	0.3	0.07	0.04	0.01	0.1
a5ss@14:21698525:21699117:-|14:21698525:21699156:-.1	chr14:21698425-21699256	ENSG00000092199	HNRNPC	heterogeneous nuclear ribonucleoprotein C (C1/C2)	a5ss	NA	0.31	0.34	0.24	0.3	0.07	0.04	0.01	0.1
a5ss@14:24410367:24422783:-|14:24410367:24422983:-.1	chr14:24410267-24423083	ENSG00000215256	DHRS4-AS1	NA	a5ss	NA	0.18	0.15	0.19	0.27	-0.01	-0.12	-0.09	-0.04
a5ss@14:54897122:54903083:-|14:54897122:54903087:-.1	chr14:54897022-54903187	ENSG00000100528	CNIH	cornichon homolog (Drosophila)	a5ss	NA	0.25	0.07	0.04	0.04	0.21	0.03	0.21	0.03
a5ss@14:64906988:64908103:+|14:64906984:64908103:+.1	chr14:64906884-64908203	ENSG00000100714	MTHFD1	methylenetetrahydrofolate dehydrogenase (NADP+ dependent) 1, methenyltetrahydrofolate cyclohydrolase, formyltetrahydrofolate synthetase	a5ss	TRUE	0.12	0.04	0.04	0.15	0.08	-0.11	-0.03	0
a5ss@14:91682137:91691028:+|14:91681900:91691028:+.1	chr14:91681800-91691128	ENSG00000133943	C14orf159	chromosome 14 open reading frame 159	a5ss	TRUE	0.16	0.2	0.09	0.11	0.07	0.09	0.05	0.11
a5ss@14:91939714:91942155:-|14:91939714:91942194:-.1	chr14:91939614-91942294	ENSG00000100796	SMEK1	SMEK homolog 1, suppressor of mek1 (Dictyostelium)	a5ss	NA	0.36	0.25	0.38	0.41	-0.02	-0.16	-0.05	-0.13
a5ss@14:92280169:92302527:-|14:92280169:92302715:-.1	chr14:92280069-92302815	ENSG00000165929	TC2N	tandem C2 domains, nuclear	a5ss	NA	0.06	0.18	0.17	0.14	-0.11	0.04	-0.08	0.01
a5ss@15:25340975:25342468:+|15:25340875:25342468:+.1	chr15:25340775-25342568	ENSG00000224078	SNHG14	NA	a5ss	NA	0.93	0.92	0.72	0.83	0.21	0.09	0.1	0.2
a5ss@15:25354250:25354345:+|15:25354246:25354345:+.1	chr15:25354146-25354445	ENSG00000224078	SNHG14	NA	a5ss	NA	0.89	0.81	0.97	0.9	-0.08	-0.09	-0.01	-0.16
a5ss@15:28886458:28886576:+|15:28886372:28886576:+.1	chr15:28886272-28886676	ENSG00000206149	HERC2P9	NA	a5ss	NA	0.54	0.61	0.41	0.31	0.13	0.3	0.23	0.2
a5ss@15:34845292:34845946:-|15:34845292:34845998:-.1	chr15:34845192-34846098	ENSG00000215252	GOLGA8B	golgin A8 family, member B	a5ss	NA	0.91	0.94	0.74	0.78	0.17	0.16	0.13	0.2
a5ss@15:74474801:74475594:-|15:74474801:74476197:-.1	chr15:74474701-74476297	ENSG00000137868	STRA6	stimulated by retinoic acid 6	a5ss	TRUE	0.18	0.26	0.18	0.13	0	0.13	0.05	0.08
a5ss@15:83146651:83182644:-|15:83146651:83182694:-.1	chr15:83146551-83182794	ENSG00000259472	RP13-996F3.3	NA	a5ss	NA	0.23	0.08	0.09	0.32	0.14	-0.24	-0.09	-0.01
a5ss@15:83146651:83182644:-|15:83146651:83182694:-.1	chr15:83146551-83182794	ENSG00000259472	RP13-996F3.3	NA	a5ss	NA	0.23	0.08	0.09	0.32	0.14	-0.24	-0.09	-0.01
a5ss@15:84874071:84898604:-|15:84874071:84898654:-.1	chr15:84873971-84898754	ENSG00000225151	AC103965.1	NA	a5ss	NA	0.73	0.54	0.24	0.51	0.49	0.03	0.22	0.3
a5ss@16:16427741:16429909:+|16:16427620:16429909:+.1	chr16:16427520-16430009	ENSG00000183889	PKD1P1	NPIP-like protein 1	a5ss	NA	0.74	0.93	0.83	0.78	-0.09	0.15	-0.04	0.1
a5ss@16:22524931:22525085:+|16:22524921:22525085:+.1	chr16:22524821-22525185	ENSG00000243716	NPIPL3	Putative NPIP-like protein LOC100132247	a5ss	NA	0.33	0.43	0.5	0.24	-0.17	0.19	0.09	-0.07
a5ss@16:22530735:22535141:+|16:22530590:22535141:+.1	chr16:22530490-22535241	ENSG00000243716	NPIPL3	Putative NPIP-like protein LOC100132247	a5ss	TRUE	0.07	0.99	0.66	0.01	-0.59	0.98	0.06	0.33
a5ss@16:27238154:27244317:-|16:27238154:27244322:-.1	chr16:27238054-27244422	ENSG00000169189	NSMCE1	non-SMC element 1 homolog (S. cerevisiae)	a5ss	NA	0.05	0.08	0.66	0.14	-0.61	-0.06	-0.09	-0.58
a5ss@16:27474913:27475641:-|16:27474913:27475716:-.1	chr16:27474813-27475816	ENSG00000077235	GTF3C1	general transcription factor IIIC, polypeptide 1, alpha 220kDa	a5ss	NA	0.47	0.51	0.34	0.43	0.13	0.08	0.04	0.17
a5ss@16:28847497:28847647:+|16:28847443:28847647:+.1	chr16:28847343-28847747	ENSG00000168488	ATXN2L	ataxin 2-like	a5ss	NA	0.46	0.51	0.35	0.38	0.11	0.13	0.08	0.16
a5ss@16:28847497:28848072:+|16:28847443:28848072:+.1	chr16:28847343-28848172	ENSG00000168488	ATXN2L	ataxin 2-like	a5ss	NA	0.38	0.41	0.26	0.34	0.12	0.07	0.04	0.15
a5ss@16:28847806:28848049:+|16:28847497:28848049:+|16:28847443:28848049:+.1	chr16:28847343-28848149	ENSG00000168488	ATXN2L	ataxin 2-like	a5ss	TRUE	0.44	0.48	0.35	0.36	0.09	0.12	0.08	0.13
a5ss@16:28847806:28848069:+|16:28847443:28848069:+.1	chr16:28847343-28848169	ENSG00000168488	ATXN2L	ataxin 2-like	a5ss	TRUE	0.53	0.55	0.34	0.41	0.19	0.14	0.12	0.21
a5ss@16:28847811:28848072:+|16:28847497:28848072:+|16:28847443:28848072:+.1	chr16:28847343-28848172	ENSG00000168488	ATXN2L	ataxin 2-like	a5ss	TRUE	0.4	0.43	0.3	0.32	0.1	0.11	0.08	0.13
a5ss@16:30015978:30016542:+|16:30012851:30016542:+.1	chr16:30012751-30016642	ENSG00000169592	INO80E	INO80 complex subunit E	a5ss	TRUE	0.52	0.57	0.29	0.32	0.23	0.25	0.2	0.28
a5ss@16:47156695:47156779:-|16:47156695:47156800:-.1	chr16:47156595-47156900	ENSG00000171208	NETO2	neuropilin (NRP) and tolloid (TLL)-like 2	a5ss	NA	0.88	0.87	0.76	0.79	0.12	0.08	0.09	0.11
a5ss@16:66976688:66977202:+|16:66976640:66977202:+.1	chr16:66976540-66977302	ENSG00000172831	CES2	carboxylesterase 2	a5ss	NA	0.81	0.72	0.87	0.79	-0.06	-0.07	0.02	-0.15
a5ss@16:67116242:67132613:+|16:67116211:67132613:+.1	chr16:67116111-67132713	ENSG00000067955	CBFB	core-binding factor, beta subunit	a5ss	NA	0.72	0.64	0.57	0.61	0.15	0.03	0.11	0.07
a5ss@16:713064:715679:+|16:712844:715679:+.1	chr16:712744-715779	ENSG00000161996	WDR90	WD repeat domain 90	a5ss	TRUE	0.51	0.55	0.37	0.4	0.14	0.15	0.11	0.18
a5ss@16:838775:838931:+|16:838756:838931:+.1	chr16:838656-839031	ENSG00000127586	CHTF18	CTF18, chromosome transmission fidelity factor 18 homolog (S. cerevisiae)	a5ss	FALSE	0.88	0.82	0.96	0.87	-0.08	-0.05	0.01	-0.14
a5ss@16:89753205:89755660:+|16:89753167:89755660:+.1	chr16:89753067-89755760	ENSG00000185324	CDK10	cyclin-dependent kinase 10	a5ss	FALSE	0.35	0.52	0.37	0.28	-0.02	0.24	0.07	0.15
a5ss@17:10609871:10614151:+|17:10609867:10614151:+.1	chr17:10609767-10614251	ENSG00000170222	ADPRM	ADP-ribose/CDP-alcohol diphosphatase, manganese-dependent	a5ss	NA	0.93	0.9	0.88	0.79	0.05	0.11	0.14	0.02
a5ss@17:34151202:34160911:+|17:34151103:34160911:+.1	chr17:34151003-34161011	ENSG00000172660	TAF15	TAF15 RNA polymerase II, TATA box binding protein (TBP)-associated factor, 68kDa	a5ss	NA	0.79	0.75	0.63	0.7	0.16	0.05	0.09	0.12
a5ss@17:3725346:3727087:-|17:3725346:3728236:-.1	chr17:3725246-3728336	ENSG00000074356	C17orf85	chromosome 17 open reading frame 85	a5ss	TRUE	0.32	0.34	0.16	0.17	0.16	0.17	0.15	0.18
a5ss@17:40270421:40271072:-|17:40270421:40271263:-.1	chr17:40270321-40271363	ENSG00000108773	KAT2A	K(lysine) acetyltransferase 2A	a5ss	TRUE	0.55	0.57	0.51	0.4	0.04	0.17	0.15	0.06
a5ss@17:60004023:60005015:-|17:60004023:60005296:-.1	chr17:60003923-60005396	ENSG00000108506	INTS2	integrator complex subunit 2	a5ss	TRUE	0.57	0.52	0.26	0.55	0.31	-0.03	0.02	0.26
a5ss@17:73487548:73487772:+|17:73487536:73487772:+.1	chr17:73487436-73487872	ENSG00000177728	KIAA0195	KIAA0195	a5ss	NA	0.21	0.23	0.24	0.33	-0.03	-0.1	-0.12	-0.01
a5ss@17:74723439:74729060:+|17:74723295:74729060:+|17:74723260:74729060:+.1	chr17:74723160-74729160	ENSG00000181038	METTL23	methyltransferase like 23	a5ss	NA	0.15	0.19	0.07	0.12	0.08	0.07	0.03	0.12
a5ss@17:76210874:76212047:+|17:76210870:76212047:+.1	chr17:76210770-76212147	ENSG00000089685	BIRC5	baculoviral IAP repeat containing 5	a5ss	TRUE	0.06	0.31	0.18	0.27	-0.12	0.04	-0.21	0.13
a5ss@17:77078959:77079102:+|17:77078145:77079102:+.1	chr17:77078045-77079202	ENSG00000167280	ENGASE	endo-beta-N-acetylglucosaminidase	a5ss	TRUE	0.36	0.36	0.49	0.49	-0.13	-0.13	-0.13	-0.13
a5ss@17:80398210:80398873:+|17:80397589:80398873:+.1	chr17:80397489-80398973	ENSG00000169660	HEXDC	hexosaminidase (glycosyl hydrolase family 20, catalytic domain) containing	a5ss	TRUE	0.48	0.59	0.27	0.28	0.21	0.31	0.2	0.32
a5ss@18:77246937:77287528:+|18:77246630:77287528:+.1	chr18:77246530-77287628	ENSG00000131196	NFATC1	nuclear factor of activated T-cells, cytoplasmic, calcineurin-dependent 1	a5ss	NA	0.58	0.49	0.38	0.45	0.2	0.04	0.13	0.11
a5ss@19:10657791:10657865:+|19:10657747:10657865:+.1	chr19:10657647-10657965	ENSG00000130734	ATG4D	autophagy related 4D, cysteine peptidase	a5ss	FALSE	0.73	0.85	0.92	0.85	-0.19	0	-0.12	-0.07
a5ss@19:10657791:10657865:+|19:10657758:10657865:+|19:10657747:10657865:+.1	chr19:10657647-10657965	ENSG00000130734	ATG4D	autophagy related 4D, cysteine peptidase	a5ss	FALSE	0.7	0.82	0.88	0.83	-0.18	-0.01	-0.13	-0.06
a5ss@19:19788799:19789535:+|19:19788795:19789535:+.1	chr19:19788695-19789635	ENSG00000181896	ZNF101	zinc finger protein 101	a5ss	NA	0.69	0.77	0.97	0.82	-0.28	-0.05	-0.13	-0.2
a5ss@19:35990931:35991280:-|19:35990931:35991435:-.1	chr19:35990831-35991535	ENSG00000161249	DMKN	dermokine	a5ss	TRUE	0.18	0.22	0.17	0.12	0.01	0.1	0.06	0.05
a5ss@19:3613584:3614384:-|19:3613584:3614395:-.1	chr19:3613484-3614495	ENSG00000105298	CACTIN	cactin, spliceosome C complex subunit	a5ss	TRUE	0.14	0.2	0.11	0.05	0.03	0.15	0.09	0.09
a5ss@19:49606844:49607891:+|19:49605442:49607891:+.1	chr19:49605342-49607991	ENSG00000104852	SNRNP70	small nuclear ribonucleoprotein 70kDa (U1)	a5ss	NA	0.38	0.4	0.29	0.3	0.09	0.1	0.08	0.11
a5ss@19:58512738:58513764:-|19:58512738:58514148:-.1	chr19:58512638-58514248	ENSG00000166704	ZNF606	zinc finger protein 606	a5ss	NA	0.74	0.63	0.31	0.59	0.43	0.04	0.15	0.32
a5ss@2:202098345:202098739:+|2:202098277:202098739:+.1	chr2:202098177-202098839	ENSG00000064012	CASP8	caspase 8, apoptosis-related cysteine peptidase	a5ss	NA	0.53	0.64	0.44	0.57	0.09	0.07	-0.04	0.2
a5ss@2:202141827:202149539:+|2:202141691:202149539:+.1	chr2:202141591-202149639	ENSG00000064012	CASP8	caspase 8, apoptosis-related cysteine peptidase	a5ss	TRUE	0.35	0.24	0.2	0.2	0.15	0.04	0.15	0.04
a5ss@2:242610856:242611606:+|2:242610840:242611606:+|2:242610820:242611606:+.1	chr2:242610720-242611706	ENSG00000168397	ATG4B	autophagy related 4B, cysteine peptidase	a5ss	NA	0.14	0.2	0.06	0.03	0.08	0.17	0.11	0.14
a5ss@2:25861963:25875459:-|2:25861963:25875463:-.1	chr2:25861863-25875563	ENSG00000138101	DTNB	dystrobrevin, beta	a5ss	TRUE	0.15	0.04	0.03	0.18	0.12	-0.14	-0.03	0.01
a5ss@2:25861963:25875459:-|2:25861963:25875463:-.1	chr2:25861863-25875563	ENSG00000138101	DTNB	dystrobrevin, beta	a5ss	TRUE	0.15	0.04	0.03	0.18	0.12	-0.14	-0.03	0.01
a5ss@2:60679801:60687665:-|2:60679801:60687817:-|2:60679801:60689417:-.1	chr2:60679701-60689517	ENSG00000119866	BCL11A	B-cell CLL/lymphoma 11A (zinc finger protein)	a5ss	NA	0.57	0.48	0.19	0.25	0.38	0.23	0.32	0.29
a5ss@2:88485243:88485417:+|2:88484998:88485417:+.1	chr2:88484898-88485517	ENSG00000144115	THNSL2	threonine synthase-like 2 (S. cerevisiae)	a5ss	TRUE	0.41	0.42	0.29	0.24	0.12	0.18	0.17	0.13
a5ss@20:2639168:2639284:-|20:2639168:2639405:-.1	chr20:2639068-2639505	ENSG00000101365	IDH3B	isocitrate dehydrogenase 3 (NAD+) beta	a5ss	TRUE	0.6	0.61	0.7	0.71	-0.1	-0.1	-0.11	-0.09
a5ss@21:34123529:34127524:-|21:34123529:34127541:-.1	chr21:34123429-34127641	ENSG00000159086	PAXBP1	PAX3 and PAX7 binding protein 1	a5ss	TRUE	0.65	0.71	0.48	0.47	0.17	0.24	0.18	0.23
a5ss@21:45750209:45750346:-|21:45750209:45750706:-.1	chr21:45750109-45750806	ENSG00000160226	C21orf2	chromosome 21 open reading frame 2	a5ss	NA	0.32	0.27	0.22	0.28	0.1	-0.01	0.04	0.05
a5ss@21:45753145:45753944:-|21:45753145:45755641:-.1	chr21:45753045-45755741	ENSG00000160226	C21orf2	chromosome 21 open reading frame 2	a5ss	TRUE	0.32	0.31	0.16	0.15	0.16	0.16	0.17	0.15
a5ss@21:46952062:46957681:-|21:46952062:46957685:-.1	chr21:46951962-46957785	ENSG00000173638	SLC19A1	solute carrier family 19 (folate transporter), member 1	a5ss	TRUE	0.2	0.15	0.11	0.09	0.09	0.06	0.11	0.04
a5ss@22:18640626:18642939:+|22:18640587:18642939:+.1	chr22:18640487-18643039	ENSG00000184979	USP18	ubiquitin specific peptidase 18	a5ss	TRUE	0.1	0.05	0.17	0.1	-0.07	-0.05	0	-0.12
a5ss@22:18894599:18897685:+|22:18894238:18897685:+.1	chr22:18894138-18897785	ENSG00000183628	DGCR6	DiGeorge syndrome critical region gene 6	a5ss	TRUE	0.12	0.22	0.08	0.1	0.04	0.12	0.02	0.14
a5ss@22:24718886:24720188:+|22:24717291:24720188:+.1	chr22:24717191-24720288	ENSG00000100014	SPECC1L	sperm antigen with calponin homology and coiled-coil domains 1-like	a5ss	FALSE	0.98	0.96	0.7	0.9	0.28	0.06	0.08	0.26
a5ss@22:35742965:35743048:+|22:35742962:35743048:+.1	chr22:35742862-35743148	ENSG00000100284	TOM1	target of myb1 (chicken)	a5ss	NA	0.2	0.21	0.08	0.17	0.12	0.04	0.03	0.13
a5ss@22:38323833:38327806:+|22:38323827:38327806:+.1	chr22:38323727-38327906	ENSG00000100139	MICALL1	MICAL-like 1	a5ss	NA	0.87	0.8	0.91	0.98	-0.04	-0.18	-0.11	-0.11
a5ss@22:38453594:38453760:+|22:38453496:38453760:+|22:38453443:38453760:+.1	chr22:38453343-38453860	ENSG00000100151	PICK1	protein interacting with PRKCA 1	a5ss	NA	0.57	0.64	0.47	0.44	0.1	0.2	0.13	0.17
a5ss@22:51222449:51223601:+|22:51222292:51223601:+.1	chr22:51222192-51223701	ENSG00000184319	RPL23AP82	NA	a5ss	NA	0.24	0.35	0.29	0.22	-0.05	0.13	0.02	0.06
a5ss@3:10059755:10065214:-|3:10059755:10065244:-.1	chr3:10059655-10065344	ENSG00000186162	CIDECP	NA	a5ss	NA	0.23	0.17	0.19	0.42	0.04	-0.25	-0.19	-0.02
a5ss@3:113225452:113233744:-|3:113225452:113233927:-.1	chr3:113225352-113234027	ENSG00000163611	SPICE1	spindle and centriole associated protein 1	a5ss	NA	0.24	0.13	0.17	0.37	0.07	-0.24	-0.13	-0.04
a5ss@3:121387005:121388044:-|3:121387005:121388059:-.1	chr3:121386905-121388159	ENSG00000173230	GOLGB1	golgin B1	a5ss	NA	0.43	0.37	0.32	0.33	0.11	0.04	0.1	0.05
a5ss@3:121547819:121553096:-|3:121547819:121553238:-.1	chr3:121547719-121553338	ENSG00000173226	IQCB1	IQ motif containing B1	a5ss	NA	0.12	0.13	0.02	0.05	0.1	0.08	0.07	0.11
a5ss@3:128598860:128603496:+|3:128598684:128603496:+.1	chr3:128598584-128603596	ENSG00000177646	ACAD9	acyl-CoA dehydrogenase family, member 9	a5ss	TRUE	0.2	0.16	0.1	0.11	0.1	0.05	0.09	0.06
a5ss@3:158289180:158310223:+|3:158289136:158310223:+.1	chr3:158289036-158310323	ENSG00000178053	MLF1	myeloid leukemia factor 1	a5ss	TRUE	0.27	0.17	0.36	0.26	-0.09	-0.09	0.01	-0.19
a5ss@3:159482927:159583952:+|3:159482888:159583952:+.1	chr3:159482788-159584052	ENSG00000151967	SCHIP1	schwannomin interacting protein 1	a5ss	NA	0.93	0.97	0.76	0.91	0.17	0.06	0.02	0.21
a5ss@3:48299467:48302303:+|3:48299451:48302303:+.1	chr3:48299351-48302403	ENSG00000164048	ZNF589	zinc finger protein 589	a5ss	TRUE	0.09	0.19	0.01	0.14	0.08	0.05	-0.05	0.18
a5ss@3:48962404:48964895:+|3:48962272:48964895:+.1	chr3:48962172-48964995	ENSG00000177479	ARIH2	ariadne homolog 2 (Drosophila)	a5ss	NA	0.19	0.2	0.05	0.1	0.14	0.1	0.09	0.15
a5ss@3:48962404:48964895:+|3:48962274:48964895:+|3:48962272:48964895:+.1	chr3:48962172-48964995	ENSG00000177479	ARIH2	ariadne homolog 2 (Drosophila)	a5ss	NA	0.19	0.19	0.05	0.1	0.14	0.09	0.09	0.14
a5ss@3:75482021:75483876:-|3:75482021:75484069:-.1	chr3:75481921-75484169	ENSG00000244026	FAM86DP	NA	a5ss	NA	0.16	0.08	0.05	0.11	0.11	-0.03	0.05	0.03
a5ss@3:9429811:9431964:-|3:9429811:9431974:-.1	chr3:9429711-9432074	ENSG00000206573	SETD5-AS1	NA	a5ss	NA	0.23	0.28	0.05	0.12	0.18	0.16	0.11	0.23
a5ss@3:9982710:9982795:+|3:9982700:9982795:+.1	chr3:9982600-9982895	ENSG00000163703	CRELD1	cysteine-rich with EGF-like domains 1	a5ss	FALSE	0.85	0.93	0.79	0.75	0.06	0.18	0.1	0.14
a5ss@4:4544352:4546465:+|4:4544202:4546465:+.1	chr4:4544102-4546565	ENSG00000247708	RP11-323F5.2	NA	a5ss	NA	0.76	0.8	0.47	0.54	0.29	0.26	0.22	0.33
a5ss@5:154238376:154242767:+|5:154238361:154242767:+|5:154238357:154242767:+|5:154238328:154242767:+.1	chr5:154238228-154242867	ENSG00000155508	CNOT8	CCR4-NOT transcription complex, subunit 8	a5ss	NA	0.35	0.29	0.16	0.24	0.19	0.05	0.11	0.13
a5ss@5:1602850:1632759:-|5:1602850:1632960:-.1	chr5:1602750-1633060	ENSG00000188002	RP11-43F13.1	NA	a5ss	NA	0.04	0.01	0.06	0.11	-0.02	-0.1	-0.07	-0.05
a5ss@5:37064121:37064629:+|5:37064080:37064629:+.1	chr5:37063980-37064729	ENSG00000164190	NIPBL	Nipped-B homolog (Drosophila)	a5ss	NA	0.43	0.33	0.26	0.38	0.17	-0.05	0.05	0.07
a5ss@5:82373481:82400729:+|5:82373434:82400729:+.1	chr5:82373334-82400829	ENSG00000152422	XRCC4	X-ray repair complementing defective repair in Chinese hamster cells 4	a5ss	NA	0.1	0.23	0.27	0.21	-0.17	0.02	-0.11	-0.04
a5ss@6:161514883:161518112:+|6:161514871:161518112:+.1	chr6:161514771-161518212	ENSG00000085511	MAP3K4	mitogen-activated protein kinase kinase kinase 4	a5ss	NA	0.44	0.32	0.25	0.43	0.19	-0.11	0.01	0.07
a5ss@6:2959576:2971725:-|6:2959576:2971767:-.1	chr6:2959476-2971867	ENSG00000124570	SERPINB6	serpin peptidase inhibitor, clade B (ovalbumin), member 6	a5ss	NA	0.14	0.2	0.1	0.19	0.04	0.01	-0.05	0.1
a5ss@6:31619553:31620177:-|6:31619553:31620201:-.1	chr6:31619453-31620301	ENSG00000204463	BAG6	BCL2-associated athanogene 6	a5ss	NA	0.49	0.53	0.62	0.51	-0.13	0.02	-0.02	-0.09
a5ss@6:43019501:43019851:-|6:43019501:43019947:-.1	chr6:43019401-43020047	ENSG00000044090	CUL7	cullin 7	a5ss	NA	0.18	0.12	0.24	0.14	-0.06	-0.02	0.04	-0.12
a5ss@6:7581802:7582875:+|6:7580005:7582875:+.1	chr6:7579905-7582975	ENSG00000096696	DSP	desmoplakin	a5ss	NA	0.84	0.83	0.56	0.69	0.28	0.14	0.15	0.27
a5ss@6:7581802:7582875:+|6:7580473:7582875:+|6:7580005:7582875:+.1	chr6:7579905-7582975	ENSG00000096696	DSP	desmoplakin	a5ss	NA	0.83	0.82	0.56	0.69	0.27	0.13	0.14	0.26
a5ss@6:79911443:79911773:-|6:79911443:79911780:-|6:79911443:79911786:-|6:79911443:79911993:-|6:79911443:79912034:-.1	chr6:79911343-79912134	ENSG00000118418	HMGN3	high mobility group nucleosomal binding domain 3	a5ss	TRUE	0.21	0.17	0.15	0.1	0.06	0.07	0.11	0.02
a5ss@7:24870524:24873706:-|7:24870524:24874105:-.1	chr7:24870424-24874205	ENSG00000070882	OSBPL3	oxysterol binding protein-like 3	a5ss	TRUE	0.24	0.24	0.11	0.09	0.13	0.15	0.15	0.13
a5ss@7:98513511:98515046:+|7:98513454:98515046:+.1	chr7:98513354-98515146	ENSG00000196367	TRRAP	transformation/transcription domain-associated protein	a5ss	NA	0.81	0.74	0.56	0.79	0.25	-0.05	0.02	0.18
a5ss@7:99933960:99935802:+|7:99933843:99935802:+.1	chr7:99933743-99935902	ENSG00000121716	PILRB	paired immunoglobin-like type 2 receptor beta	a5ss	NA	0.65	0.6	0.53	0.48	0.12	0.12	0.17	0.07
a5ss@8:125516192:125516512:-|8:125516192:125516516:-.1	chr8:125516092-125516616	ENSG00000147687	TATDN1	TatD DNase domain containing 1	a5ss	TRUE	0.28	0.28	0.5	0.38	-0.22	-0.1	-0.1	-0.22
a5ss@8:126104200:126114293:+|8:126104142:126114293:+.1	chr8:126104042-126114393	ENSG00000156831	NSMCE2	non-SMC element 2, MMS21 homolog (S. cerevisiae)	a5ss	NA	0.97	0.93	0.87	0.84	0.1	0.09	0.13	0.06
a5ss@8:23297428:23299082:-|8:23297428:23299106:-.1	chr8:23297328-23299206	ENSG00000197217	ENTPD4	ectonucleoside triphosphate diphosphohydrolase 4	a5ss	NA	0.72	0.72	0.47	0.61	0.25	0.11	0.11	0.25
a5ss@8:42935584:42938261:+|8:42932507:42938261:+.1	chr8:42932407-42938361	ENSG00000168522	FNTA	farnesyltransferase, CAAX box, alpha	a5ss	TRUE	0.15	0.17	0.03	0.07	0.12	0.1	0.08	0.14
a5ss@8:56854550:56859007:+|8:56854487:56859007:+.1	chr8:56854387-56859107	ENSG00000254087	LYN	v-yes-1 Yamaguchi sarcoma viral related oncogene homolog	a5ss	NA	0.64	0.68	0.54	0.65	0.1	0.03	-0.01	0.14
a5ss@8:67958195:67959920:-|8:67958195:67960003:-.1	chr8:67958095-67960103	ENSG00000121022	COPS5	COP9 constitutive photomorphogenic homolog subunit 5 (Arabidopsis)	a5ss	NA	0.39	0.36	0.17	0.3	0.22	0.06	0.09	0.19
a5ss@8:95686734:95690431:+|8:95686722:95690431:+.1	chr8:95686622-95690531	ENSG00000104413	ESRP1	epithelial splicing regulatory protein 1	a5ss	NA	0.65	0.63	0.53	0.54	0.12	0.09	0.11	0.1
a5ss@9:101494835:101498284:-|9:101494835:101498778:-|9:101494835:101498809:-.1	chr9:101494735-101498909	ENSG00000165138	ANKS6	ankyrin repeat and sterile alpha motif domain containing 6	a5ss	TRUE	0.96	0.97	0.84	0.92	0.12	0.05	0.04	0.13
a5ss@9:131700223:131702648:+|9:131700057:131702648:+.1	chr9:131699957-131702748	ENSG00000175287	PHYHD1	phytanoyl-CoA dioxygenase domain containing 1	a5ss	TRUE	0.18	NA	0.03	0.1	0.15	NA	0.08	NA
a5ss@9:131831254:131831355:+|9:131830611:131831355:+.1	chr9:131830511-131831455	ENSG00000148343	FAM73B	family with sequence similarity 73, member B	a5ss	TRUE	0.31	0.4	0.24	0.17	0.07	0.23	0.14	0.16
a5ss@9:131831254:131831355:+|9:131830615:131831355:+|9:131830611:131831355:+.1	chr9:131830511-131831455	ENSG00000148343	FAM73B	family with sequence similarity 73, member B	a5ss	TRUE	0.3	0.41	0.24	0.17	0.06	0.24	0.13	0.17
a5ss@9:135975769:135975883:-|9:135975769:135976907:-.1	chr9:135975669-135977007	ENSG00000160271	RALGDS	ral guanine nucleotide dissociation stimulator	a5ss	TRUE	0.35	0.36	0.22	0.21	0.13	0.15	0.14	0.14
a5ss@9:90341313:90342509:+|9:90341223:90342509:+|9:90341168:90342509:+|9:90341164:90342509:+.1	chr9:90341064-90342609	ENSG00000135047	CTSL1	cathepsin L1	a5ss	NA	0.4	0.33	0.24	0.28	0.16	0.05	0.12	0.09
a5ss@X:103432987:103434289:+|X:103432858:103434289:+.1	chrX:103432758-103434389	ENSG00000123575	FAM199X	family with sequence similarity 199, X-linked	a5ss	NA	0.94	0.96	0.91	0.85	0.03	0.11	0.09	0.05
a5ss@X:149102355:149105632:-|X:149102355:149105651:-.1	chrX:149102255-149105751	ENSG00000197021	CXorf40B	chromosome X open reading frame 40B	a5ss	NA	0.06	0	0.07	0.11	-0.01	-0.11	-0.05	-0.07
a5ss@X:15344168:15349338:-|X:15344168:15349712:-|X:15344168:15349996:-.1	chrX:15344068-15350096	ENSG00000165195	PIGA	phosphatidylinositol glycan anchor biosynthesis, class A	a5ss	FALSE	0.66	0.53	0.37	0.62	0.29	-0.09	0.04	0.16
a5ss@X:18915451:18917267:-|X:18915451:18917291:-.1	chrX:18915351-18917391	ENSG00000044446	PHKA2	phosphorylase kinase, alpha 2 (liver)	a5ss	NA	0.19	0.17	0.09	0.02	0.1	0.15	0.17	0.08
ci@1:100472712:100476921:+|1:100472712:100472713:+.1	chr1:100472612-100477021	ENSG00000117620	SLC35A3	solute carrier family 35 (UDP-N-acetylglucosamine (UDP-GlcNAc) transporter), member A3	ci	NA	0.96	0.89	1	0.97	-0.04	-0.08	-0.01	-0.11
ci@1:100598871:100602438:+|1:100598871:100598872:+.1	chr1:100598771-100602538	ENSG00000122435	TRMT13	tRNA methyltransferase 13 homolog (S. cerevisiae)	ci	NA	0.94	0.86	0.96	0.99	-0.02	-0.13	-0.05	-0.1
ci@1:100606070:100606408:+|1:100606070:100606071:+.1	chr1:100605970-100606508	ENSG00000122435	TRMT13	tRNA methyltransferase 13 homolog (S. cerevisiae)	ci	NA	0.63	0.57	0.95	0.91	-0.32	-0.34	-0.28	-0.38
ci@1:100606575:100608693:+|1:100606575:100606576:+.1	chr1:100606475-100608793	ENSG00000122435	TRMT13	tRNA methyltransferase 13 homolog (S. cerevisiae)	ci	NA	0.85	0.93	1	0.99	-0.15	-0.06	-0.14	-0.07
ci@1:101440458:101440775:+|1:101440458:101440459:+.1	chr1:101440358-101440875	ENSG00000162695	SLC30A7	solute carrier family 30 (zinc transporter), member 7	ci	NA	0.45	0.55	0.64	0.58	-0.19	-0.03	-0.13	-0.09
ci@1:114123283:114128009:+|1:114123283:114123284:+.1	chr1:114123183-114128109	ENSG00000081026	MAGI3	membrane associated guanylate kinase, WW and PDZ domain containing 3	ci	NA	0.92	0.96	0.85	0.8	0.07	0.16	0.12	0.11
ci@1:117624569:117626640:+|1:117624569:117624570:+.1	chr1:117624469-117626740	ENSG00000116830	TTF2	transcription termination factor, RNA polymerase II	ci	NA	0.87	0.84	0.67	0.94	0.2	-0.1	-0.07	0.17
ci@1:1217695:1219358:+|1:1217695:1217696:+.1	chr1:1217595-1219458	ENSG00000162572	SCNN1D	sodium channel, non-voltage-gated 1, delta subunit	ci	NA	0.65	1	0.86	0.69	-0.21	0.31	-0.04	0.14
ci@1:1233493:1233750:-|1:1233749:1233750:-.1	chr1:1233393-1233850	ENSG00000131584	ACAP3	ArfGAP with coiled-coil, ankyrin repeat and PH domains 3	ci	NA	0.88	0.85	0.72	0.82	0.16	0.03	0.06	0.13
ci@1:1234059:1234725:-|1:1234724:1234725:-.1	chr1:1233959-1234825	ENSG00000131584	ACAP3	ArfGAP with coiled-coil, ankyrin repeat and PH domains 3	ci	NA	0.65	0.59	0.66	0.86	-0.01	-0.27	-0.21	-0.07
ci@1:1234736:1235211:-|1:1235210:1235211:-.1	chr1:1234636-1235311	ENSG00000131584	ACAP3	ArfGAP with coiled-coil, ankyrin repeat and PH domains 3	ci	NA	0.5	0.53	0.71	0.76	-0.21	-0.23	-0.26	-0.18
ci@1:1237426:1238302:-|1:1238301:1238302:-.1	chr1:1237326-1238402	ENSG00000131584	ACAP3	ArfGAP with coiled-coil, ankyrin repeat and PH domains 3	ci	NA	0.7	0.81	0.6	0.91	0.1	-0.1	-0.21	0.21
ci@1:136854:136953:-|1:136952:136953:-.1	chr1:136754-137053	ENSG00000239906	RP11-34P13.14	NA	ci	NA	0.64	0.67	0.63	0.48	0.01	0.19	0.16	0.04
ci@1:1412730:1414024:+|1:1412730:1412731:+.1	chr1:1412630-1414124	ENSG00000160072	ATAD3B	ATPase family, AAA domain containing 3B	ci	NA	0.86	0.87	0.89	1	-0.03	-0.13	-0.14	-0.02
ci@1:1414125:1414429:+|1:1414125:1414126:+.1	chr1:1414025-1414529	ENSG00000160072	ATAD3B	ATPase family, AAA domain containing 3B	ci	NA	0.89	0.78	0.63	0.71	0.26	0.07	0.18	0.15
ci@1:145580322:145580505:+|1:145580322:145580323:+.1	chr1:145580222-145580605	ENSG00000131788	PIAS3	protein inhibitor of activated STAT, 3	ci	NA	0.85	0.83	0.95	0.9	-0.1	-0.07	-0.05	-0.12
ci@1:145586956:145587349:-|1:145587348:145587349:-.1	chr1:145586856-145587449	ENSG00000186364	NUDT17	nudix (nucleoside diphosphate linked moiety X)-type motif 17	ci	NA	0.88	0.77	0.88	0.98	0	-0.21	-0.1	-0.11
ci@1:148561115:148566850:+|1:148561115:148561116:+.1	chr1:148561015-148566950	ENSG00000243452	NBPF15	neuroblastoma breakpoint family, member 15	ci	NA	0.97	0.78	1	0.63	-0.03	0.15	0.34	-0.22
ci@1:149871225:149871563:+|1:149871225:149871226:+.1	chr1:149871125-149871663	ENSG00000178096	BOLA1	bolA homolog 1 (E. coli)	ci	NA	0.21	0.34	0.27	0.49	-0.06	-0.15	-0.28	0.07
ci@1:149901209:149901515:-|1:149901514:149901515:-.1	chr1:149901109-149901615	ENSG00000014914	MTMR11	myotubularin related protein 11	ci	NA	0.61	0.68	0.77	0.75	-0.16	-0.07	-0.14	-0.09
ci@1:149902439:149902684:-|1:149902683:149902684:-.1	chr1:149902339-149902784	ENSG00000014914	MTMR11	myotubularin related protein 11	ci	NA	0.59	0.58	0.77	0.83	-0.18	-0.25	-0.24	-0.19
ci@1:149908122:149908475:-|1:149908474:149908475:-.1	chr1:149908022-149908575	ENSG00000014914	MTMR11	myotubularin related protein 11	ci	NA	0.73	0.8	0.85	0.92	-0.12	-0.12	-0.19	-0.05
ci@1:150967175:150967736:+|1:150967175:150967176:+.1	chr1:150967075-150967836	ENSG00000143412	ANXA9	annexin A9	ci	NA	0.18	0.12	0.3	0.24	-0.12	-0.12	-0.06	-0.18
ci@1:153604716:153606434:-|1:153606433:153606434:-.1	chr1:153604616-153606534	ENSG00000189171	S100A13	S100 calcium binding protein A13	ci	NA	0.77	0.78	0.91	0.85	-0.14	-0.07	-0.08	-0.13
ci@1:153719546:153719755:+|1:153719546:153719547:+.1	chr1:153719446-153719855	ENSG00000143624	INTS3	integrator complex subunit 3	ci	NA	0.49	0.55	0.78	0.82	-0.29	-0.27	-0.33	-0.23
ci@1:153719839:153721165:+|1:153719839:153719840:+.1	chr1:153719739-153721265	ENSG00000143624	INTS3	integrator complex subunit 3	ci	NA	0.46	0.46	0.73	0.71	-0.27	-0.25	-0.25	-0.27
ci@1:153915101:153915354:-|1:153915353:153915354:-.1	chr1:153915001-153915454	ENSG00000198837	DENND4B	DENN/MADD domain containing 4B	ci	NA	0.7	0.81	0.82	0.91	-0.12	-0.1	-0.21	-0.01
ci@1:155167004:155167254:-|1:155167253:155167254:-.1	chr1:155166904-155167354	ENSG00000169231	THBS3	thrombospondin 3	ci	NA	0.89	0.67	0.74	0.81	0.15	-0.14	0.08	-0.07
ci@1:155167004:155167254:-|1:155167253:155167254:-.1	chr1:155166904-155167354	ENSG00000169231	THBS3	thrombospondin 3	ci	NA	0.89	0.67	0.74	0.81	0.15	-0.14	0.08	-0.07
ci@1:155185442:155185553:-|1:155185552:155185553:-.1	chr1:155185342-155185653	ENSG00000160766	GBAP1	NA	ci	NA	0.51	0.32	0.26	0.36	0.25	-0.04	0.15	0.06
ci@1:155186412:155186648:-|1:155186647:155186648:-.1	chr1:155186312-155186748	ENSG00000160766	GBAP1	NA	ci	NA	0.82	0.95	0.99	0.91	-0.17	0.04	-0.09	-0.04
ci@1:155491409:155531944:-|1:155531943:155531944:-.1	chr1:155491309-155532044	ENSG00000116539	ASH1L	ash1 (absent, small, or homeotic)-like (Drosophila)	ci	NA	0.75	0.69	0.39	0.57	0.36	0.12	0.18	0.3
ci@1:155581618:155581774:+|1:155581618:155581619:+.1	chr1:155581518-155581874	ENSG00000125459	MSTO1	misato homolog 1 (Drosophila)	ci	NA	0.67	0.66	0.55	0.68	0.12	-0.02	-0.01	0.11
ci@1:155723205:155724166:-|1:155724165:155724166:-.1	chr1:155723105-155724266	ENSG00000116580	GON4L	gon-4-like (C. elegans)	ci	NA	0.8	0.84	0.92	0.85	-0.12	-0.01	-0.05	-0.08
ci@1:155733355:155734791:-|1:155734790:155734791:-.1	chr1:155733255-155734891	ENSG00000116580	GON4L	gon-4-like (C. elegans)	ci	NA	0.72	0.64	0.59	0.64	0.13	0	0.08	0.05
ci@1:155884111:155885664:-|1:155885663:155885664:-.1	chr1:155884011-155885764	ENSG00000132680	KIAA0907	KIAA0907	ci	NA	0.61	0.57	0.54	0.43	0.07	0.14	0.18	0.03
ci@1:155886528:155887290:-|1:155887289:155887290:-.1	chr1:155886428-155887390	ENSG00000132680	KIAA0907	KIAA0907	ci	NA	0.64	0.73	0.85	0.73	-0.21	0	-0.09	-0.12
ci@1:156437448:156437785:-|1:156437784:156437785:-.1	chr1:156437348-156437885	ENSG00000116604	MEF2D	myocyte enhancer factor 2D	ci	NA	0.83	0.93	0.84	0.81	-0.01	0.12	0.02	0.09
ci@1:156699007:156701783:+|1:156699007:156699008:+.1	chr1:156698907-156701883	ENSG00000143303	RRNAD1	ribosomal RNA adenine dimethylase domain containing 1	ci	NA	0.66	0.59	0.78	0.75	-0.12	-0.16	-0.09	-0.19
ci@1:156701907:156702073:+|1:156701907:156701908:+.1	chr1:156701807-156702173	ENSG00000143303	RRNAD1	ribosomal RNA adenine dimethylase domain containing 1	ci	NA	0.6	0.65	0.76	0.73	-0.16	-0.08	-0.13	-0.11
ci@1:160063961:160064659:-|1:160064658:160064659:-.1	chr1:160063861-160064759	ENSG00000162729	IGSF8	immunoglobulin superfamily, member 8	ci	NA	0.91	0.76	0.91	0.94	0	-0.18	-0.03	-0.15
ci@1:160065036:160068199:-|1:160068198:160068199:-.1	chr1:160064936-160068299	ENSG00000162729	IGSF8	immunoglobulin superfamily, member 8	ci	NA	0.98	0.88	1	0.98	-0.02	-0.1	0	-0.12
ci@1:160188758:160192441:-|1:160192440:160192441:-.1	chr1:160188658-160192541	ENSG00000132716	DCAF8	DDB1 and CUL4 associated factor 8	ci	NA	0.73	0.76	0.83	0.85	-0.1	-0.09	-0.12	-0.07
ci@1:160208537:160209487:-|1:160209486:160209487:-.1	chr1:160208437-160209587	ENSG00000132716	DCAF8	DDB1 and CUL4 associated factor 8	ci	NA	0.75	0.74	0.85	0.78	-0.1	-0.04	-0.03	-0.11
ci@1:16059024:16059107:+|1:16059024:16059025:+.1	chr1:16058924-16059207	ENSG00000116786	PLEKHM2	pleckstrin homology domain containing, family M (with RUN domain) member 2	ci	NA	0.94	0.81	0.92	0.89	0.02	-0.08	0.05	-0.11
ci@1:161019124:161019214:-|1:161019213:161019214:-.1	chr1:161019024-161019314	ENSG00000186517	ARHGAP30	Rho GTPase activating protein 30	ci	NA	0	0.2	0.58	0.21	-0.58	-0.01	-0.21	-0.38
ci@1:161134402:161134625:+|1:161134402:161134403:+.1	chr1:161134302-161134725	ENSG00000143258	USP21	ubiquitin specific peptidase 21	ci	NA	0.76	0.77	0.83	0.88	-0.07	-0.11	-0.12	-0.06
ci@1:161137917:161138222:+|1:161137917:161137918:+.1	chr1:161137817-161138322	ENSG00000143224	PPOX	protoporphyrinogen oxidase	ci	NA	0.78	0.74	0.81	0.86	-0.03	-0.12	-0.08	-0.07
ci@1:161138973:161139450:+|1:161138973:161138974:+.1	chr1:161138873-161139550	ENSG00000143224	PPOX	protoporphyrinogen oxidase	ci	NA	0.76	0.74	0.84	0.89	-0.08	-0.15	-0.13	-0.1
ci@1:161139510:161139696:+|1:161139510:161139511:+.1	chr1:161139410-161139796	ENSG00000143224	PPOX	protoporphyrinogen oxidase	ci	NA	0.69	0.76	0.76	0.84	-0.07	-0.08	-0.15	0
ci@1:161334940:161335316:-|1:161335315:161335316:-.1	chr1:161334840-161335416	ENSG00000188931	C1orf192	chromosome 1 open reading frame 192	ci	NA	0.02	0.18	0	0	0.02	0.18	0.02	0.18
ci@1:161335492:161335988:-|1:161335987:161335988:-.1	chr1:161335392-161336088	ENSG00000188931	C1orf192	chromosome 1 open reading frame 192	ci	NA	0.03	0.13	0.01	0	0.02	0.13	0.03	0.12
ci@1:161336068:161336229:-|1:161336228:161336229:-.1	chr1:161335968-161336329	ENSG00000188931	C1orf192	chromosome 1 open reading frame 192	ci	NA	0.03	0.17	0	0.01	0.03	0.16	0.02	0.17
ci@1:161336291:161337632:-|1:161337631:161337632:-.1	chr1:161336191-161337732	ENSG00000188931	C1orf192	chromosome 1 open reading frame 192	ci	NA	0.02	0.1	0	0	0.02	0.1	0.02	0.1
ci@1:166819660:166821822:+|1:166819660:166819661:+.1	chr1:166819560-166821922	ENSG00000143157	POGK	pogo transposable element with KRAB domain	ci	NA	0.67	0.72	0.8	0.71	-0.13	0.01	-0.04	-0.08
ci@1:16974076:16974279:+|1:16974076:16974077:+.1	chr1:16973976-16974379	ENSG00000186301	MST1P2	NA	ci	NA	0.43	0.65	0.34	0.28	0.09	0.37	0.15	0.31
ci@1:16975287:16975376:+|1:16975287:16975288:+.1	chr1:16975187-16975476	ENSG00000186301	MST1P2	NA	ci	NA	0.51	0.39	0.7	0.64	-0.19	-0.25	-0.13	-0.31
ci@1:169828353:169831754:-|1:169831753:169831754:-.1	chr1:169828253-169831854	ENSG00000000457	SCYL3	SCY1-like 3 (S. cerevisiae)	ci	NA	0.86	0.78	0.94	0.88	-0.08	-0.1	-0.02	-0.16
ci@1:173793157:173793276:-|1:173793275:173793276:-.1	chr1:173793057-173793376	ENSG00000120334	CENPL	centromere protein L	ci	NA	0.8	0.93	0.91	1	-0.11	-0.07	-0.2	0.02
ci@1:178000795:178001565:-|1:178001564:178001565:-.1	chr1:178000695-178001665	ENSG00000242193	RP11-568K15.1	NA	ci	NA	0.91	1	0.89	0.98	0.02	0.02	-0.07	0.11
ci@1:178001630:178002162:-|1:178002161:178002162:-.1	chr1:178001530-178002262	ENSG00000242193	RP11-568K15.1	NA	ci	NA	0.82	0.86	0.85	0.97	-0.03	-0.11	-0.15	0.01
ci@1:180080330:180081572:+|1:180080330:180080331:+.1	chr1:180080230-180081672	ENSG00000135837	CEP350	centrosomal protein 350kDa	ci	NA	0.12	0.2	0.32	0.2	-0.2	0	-0.08	-0.12
ci@1:180241827:180242473:-|1:180242472:180242473:-.1	chr1:180241727-180242573	ENSG00000230124	RP5-1180C10.2	NA	ci	NA	0.12	0.04	0.05	0.34	0.07	-0.3	-0.22	-0.01
ci@1:180242533:180243072:-|1:180243071:180243072:-.1	chr1:180242433-180243172	ENSG00000230124	RP5-1180C10.2	NA	ci	NA	0.23	0.08	0.35	0.39	-0.12	-0.31	-0.16	-0.27
ci@1:180243247:180243786:-|1:180243785:180243786:-.1	chr1:180243147-180243886	ENSG00000230124	RP5-1180C10.2	NA	ci	NA	0.71	0.58	0.92	0.66	-0.21	-0.08	0.05	-0.34
ci@1:197094085:197094176:-|1:197094175:197094176:-.1	chr1:197093985-197094276	ENSG00000066279	ASPM	asp (abnormal spindle) homolog, microcephaly associated (Drosophila)	ci	NA	0.86	0.79	0.82	0.95	0.04	-0.16	-0.09	-0.03
ci@1:202407152:202409834:+|1:202407152:202407153:+.1	chr1:202407052-202409934	ENSG00000077157	PPP1R12B	protein phosphatase 1, regulatory subunit 12B	ci	NA	0.93	0.91	0.59	0.84	0.34	0.07	0.09	0.32
ci@1:203137803:203138034:-|1:203138033:203138034:-.1	chr1:203137703-203138134	ENSG00000133055	MYBPH	myosin binding protein H	ci	NA	0.85	0.86	0.98	0.9	-0.13	-0.04	-0.05	-0.12
ci@1:203830871:203831310:+|1:203830871:203830872:+.1	chr1:203830771-203831410	ENSG00000182004	SNRPE	small nuclear ribonucleoprotein polypeptide E	ci	NA	0.6	0.56	0.67	0.74	-0.07	-0.18	-0.14	-0.11
ci@1:204167624:204168323:-|1:204168322:204168323:-.1	chr1:204167524-204168423	ENSG00000174567	GOLT1A	golgi transport 1A	ci	NA	0.77	0.73	0.87	0.88	-0.1	-0.15	-0.11	-0.14
ci@1:204192713:204197211:-|1:204197210:204197211:-.1	chr1:204192613-204197311	ENSG00000143850	PLEKHA6	pleckstrin homology domain containing, family A member 6	ci	NA	0.91	0.88	1	0.92	-0.09	-0.04	-0.01	-0.12
ci@1:205568379:205569534:+|1:205568379:205568380:+.1	chr1:205568279-205569634	ENSG00000174514	MFSD4	major facilitator superfamily domain containing 4	ci	NA	0.97	0.96	0.8	0.91	0.17	0.05	0.06	0.16
ci@1:205572481:205585606:-|1:205585605:205585606:-.1	chr1:205572381-205585706	ENSG00000158711	ELK4	ELK4, ETS-domain protein (SRF accessory protein 1)	ci	NA	0.01	0.01	0.11	0.06	-0.1	-0.05	-0.05	-0.1
ci@1:206667324:206669445:+|1:206667324:206667325:+.1	chr1:206667224-206669545	ENSG00000143466	IKBKE	inhibitor of kappa light polypeptide gene enhancer in B-cells, kinase epsilon	ci	NA	0.89	0.99	1	0.93	-0.11	0.06	-0.04	-0.01
ci@1:209602433:209602526:+|1:209602433:209602434:+.1	chr1:209602333-209602626	ENSG00000230937	MIR205HG	NA	ci	NA	0.33	0.32	0.47	0.32	-0.14	0	0.01	-0.15
ci@1:222731610:222731965:-|1:222731964:222731965:-.1	chr1:222731510-222732065	ENSG00000143498	TAF1A	TATA box binding protein (TBP)-associated factor, RNA polymerase I, A, 48kDa	ci	NA	0.02	0.06	0.06	0.21	-0.04	-0.15	-0.19	0
ci@1:223718661:223722681:-|1:223722680:223722681:-.1	chr1:223718561-223722781	ENSG00000203697	CAPN8	calpain 8	ci	NA	0.23	0.23	0.44	0.36	-0.21	-0.13	-0.13	-0.21
ci@1:223803847:223806995:-|1:223806994:223806995:-.1	chr1:223803747-223807095	ENSG00000203697	CAPN8	calpain 8	ci	NA	0.7	0.72	0.74	0.83	-0.04	-0.11	-0.13	-0.02
ci@1:225156576:225161793:+|1:225156576:225156577:+.1	chr1:225156476-225161893	ENSG00000185842	DNAH14	dynein, axonemal, heavy chain 14	ci	NA	0.7	0.69	0.34	0.6	0.36	0.09	0.1	0.35
ci@1:226030175:226032199:+|1:226030175:226030176:+.1	chr1:226030075-226032299	ENSG00000143819	EPHX1	epoxide hydrolase 1, microsomal (xenobiotic)	ci	NA	0.66	0.57	0.7	0.75	-0.04	-0.18	-0.09	-0.13
ci@1:226032324:226032847:+|1:226032324:226032325:+.1	chr1:226032224-226032947	ENSG00000143819	EPHX1	epoxide hydrolase 1, microsomal (xenobiotic)	ci	NA	0.77	0.68	0.82	0.85	-0.05	-0.17	-0.08	-0.14
ci@1:226253510:226259052:+|1:226253510:226253511:+.1	chr1:226253410-226259152	ENSG00000163041	H3F3A	H3 histone, family 3A	ci	NA	0.62	0.68	0.85	0.54	-0.23	0.14	0.08	-0.17
ci@1:228112101:228112964:-|1:228112963:228112964:-.1	chr1:228112001-228113064	ENSG00000143816	WNT9A	wingless-type MMTV integration site family, member 9A	ci	NA	0.94	0.86	0.78	0.87	0.16	-0.01	0.07	0.08
ci@1:22828177:22828792:+|1:22828177:22828178:+.1	chr1:22828077-22828892	ENSG00000184677	ZBTB40	zinc finger and BTB domain containing 40	ci	NA	0.46	0.42	0.71	0.82	-0.25	-0.4	-0.36	-0.29
ci@1:228563525:228563709:+|1:228563525:228563526:+.1	chr1:228563425-228563809	ENSG00000154358	OBSCN	obscurin, cytoskeletal calmodulin and titin-interacting RhoGEF	ci	NA	0.24	0.6	0.78	0.54	-0.54	0.06	-0.3	-0.18
ci@1:228564992:228565190:+|1:228564992:228564993:+.1	chr1:228564892-228565290	ENSG00000154358	OBSCN	obscurin, cytoskeletal calmodulin and titin-interacting RhoGEF	ci	NA	0.42	0.43	1	0.44	-0.58	-0.01	-0.02	-0.57
ci@1:228565413:228565632:+|1:228565413:228565414:+.1	chr1:228565313-228565732	ENSG00000154358	OBSCN	obscurin, cytoskeletal calmodulin and titin-interacting RhoGEF	ci	NA	0.17	0.56	1	0.65	-0.83	-0.09	-0.48	-0.44
ci@1:228598877:228601498:-|1:228601497:228601498:-.1	chr1:228598777-228601598	ENSG00000162931	TRIM17	tripartite motif containing 17	ci	NA	0.64	0.75	0.95	0.63	-0.31	0.12	0.01	-0.2
ci@1:231069607:231075132:-|1:231075131:231075132:-.1	chr1:231069507-231075232	ENSG00000143643	TTC13	tetratricopeptide repeat domain 13	ci	NA	0.44	0.58	0.81	0.71	-0.37	-0.13	-0.27	-0.23
ci@1:231361269:231362485:-|1:231362484:231362485:-.1	chr1:231361169-231362585	ENSG00000143633	C1orf131	chromosome 1 open reading frame 131	ci	NA	0.78	0.86	0.91	0.93	-0.13	-0.07	-0.15	-0.05
ci@1:234541845:234546191:-|1:234546190:234546191:-.1	chr1:234541745-234546291	ENSG00000059588	TARBP1	TAR (HIV-1) RNA binding protein 1	ci	NA	0.71	0.66	0.9	0.78	-0.19	-0.12	-0.07	-0.24
ci@1:235611755:235611985:+|1:235611755:235611756:+.1	chr1:235611655-235612085	ENSG00000116957	TBCE	tubulin folding cofactor E	ci	NA	0.45	0.46	0.59	0.48	-0.14	-0.02	-0.03	-0.13
ci@1:23694558:23695859:-|1:23695858:23695859:-.1	chr1:23694458-23695959	ENSG00000125945	ZNF436	zinc finger protein 436	ci	NA	0.56	0.42	0.24	0.24	0.32	0.18	0.32	0.18
ci@1:243252681:243254833:-|1:243254832:243254833:-.1	chr1:243252581-243254933	ENSG00000214837	RP11-261C10.3	NA	ci	NA	0.24	0.36	0.44	0.31	-0.2	0.05	-0.07	-0.08
ci@1:245005560:245006343:+|1:245005560:245005561:+.1	chr1:245005460-245006443	ENSG00000203667	COX20	COX20 Cox2 chaperone homolog (S. cerevisiae)	ci	NA	0.6	0.56	0.62	0.73	-0.02	-0.17	-0.13	-0.06
ci@1:249151696:249152027:-|1:249152026:249152027:-.1	chr1:249151596-249152127	ENSG00000171163	ZNF692	zinc finger protein 692	ci	NA	0.28	0.19	0.36	0.31	-0.08	-0.12	-0.03	-0.17
ci@1:2493254:2494304:+|1:2493254:2493255:+.1	chr1:2493154-2494404	ENSG00000157873	TNFRSF14	tumor necrosis factor receptor superfamily, member 14	ci	NA	0.72	0.83	0.92	0.91	-0.2	-0.08	-0.19	-0.09
ci@1:2494335:2494587:+|1:2494335:2494336:+.1	chr1:2494235-2494687	ENSG00000157873	TNFRSF14	tumor necrosis factor receptor superfamily, member 14	ci	NA	0.77	0.74	0.89	0.94	-0.12	-0.2	-0.17	-0.15
ci@1:26511677:26513659:+|1:26511677:26511678:+.1	chr1:26511577-26513759	ENSG00000142675	CNKSR1	connector enhancer of kinase suppressor of Ras 1	ci	NA	0.84	0.91	0.87	0.96	-0.03	-0.05	-0.12	0.04
ci@1:27676256:27676463:+|1:27676256:27676257:+.1	chr1:27676156-27676563	ENSG00000142765	SYTL1	synaptotagmin-like 1	ci	NA	0.93	0.9	0.83	0.84	0.1	0.06	0.09	0.07
ci@1:27676623:27676880:+|1:27676623:27676624:+.1	chr1:27676523-27676980	ENSG00000142765	SYTL1	synaptotagmin-like 1	ci	NA	0.85	0.87	0.67	0.8	0.18	0.07	0.05	0.2
ci@1:32669646:32669787:+|1:32669646:32669647:+.1	chr1:32669546-32669887	ENSG00000160050	CCDC28B	coiled-coil domain containing 28B	ci	NA	0.4	0.24	0.62	0.4	-0.22	-0.16	0	-0.38
ci@1:32680817:32681274:-|1:32681273:32681274:-.1	chr1:32680717-32681374	ENSG00000160055	TMEM234	transmembrane protein 234	ci	NA	0.48	0.26	0.54	0.63	-0.06	-0.37	-0.15	-0.28
ci@1:32681882:32681985:-|1:32681984:32681985:-.1	chr1:32681782-32682085	ENSG00000160055	TMEM234	transmembrane protein 234	ci	NA	0.39	0.56	0.42	0.33	-0.03	0.23	0.06	0.14
ci@1:33476434:33478808:-|1:33478807:33478808:-.1	chr1:33476334-33478908	ENSG00000004455	AK2	adenylate kinase 2	ci	NA	0.68	0.65	0.7	0.76	-0.02	-0.11	-0.08	-0.05
ci@1:3547681:3548030:-|1:3548029:3548030:-.1	chr1:3547581-3548130	ENSG00000116213	WRAP73	WD repeat containing, antisense to TP73	ci	NA	0.51	0.53	0.62	0.69	-0.11	-0.16	-0.18	-0.09
ci@1:35478182:35480298:-|1:35480297:35480298:-.1	chr1:35478082-35480398	ENSG00000163867	ZMYM6	zinc finger, MYM-type 6	ci	NA	0.83	0.75	0.88	0.91	-0.05	-0.16	-0.08	-0.13
ci@1:36367671:36367805:+|1:36367671:36367672:+.1	chr1:36367571-36367905	ENSG00000092847	EIF2C1	eukaryotic translation initiation factor 2C, 1	ci	NA	0.81	0.91	0.89	0.98	-0.08	-0.07	-0.17	0.02
ci@1:37946030:37947202:+|1:37946030:37946031:+.1	chr1:37945930-37947302	ENSG00000163874	ZC3H12A	zinc finger CCCH-type containing 12A	ci	NA	0.86	0.76	0.94	0.9	-0.08	-0.14	-0.04	-0.18
ci@1:3807621:3809447:-|1:3809446:3809447:-.1	chr1:3807521-3809547	ENSG00000198912	C1orf174	chromosome 1 open reading frame 174	ci	NA	0.85	0.84	0.95	0.89	-0.1	-0.05	-0.04	-0.11
ci@1:38158250:38158348:+|1:38158250:38158251:+.1	chr1:38158150-38158448	ENSG00000134690	CDCA8	cell division cycle associated 8	ci	NA	0.48	0.43	0.42	0.26	0.06	0.17	0.22	0.01
ci@1:38186226:38186455:-|1:38186454:38186455:-.1	chr1:38186126-38186555	ENSG00000183317	EPHA10	EPH receptor A10	ci	NA	0.66	0.78	0.79	0.89	-0.13	-0.11	-0.23	-0.01
ci@1:40922743:40923016:+|1:40922743:40922744:+.1	chr1:40922643-40923116	ENSG00000187801	ZFP69B	ZFP69 zinc finger protein B	ci	NA	0.75	0.94	1	1	-0.25	-0.06	-0.25	-0.06
ci@1:43917684:43917876:-|1:43917875:43917876:-.1	chr1:43917584-43917976	ENSG00000178922	HYI	hydroxypyruvate isomerase (putative)	ci	NA	0.68	0.61	0.77	0.7	-0.09	-0.09	-0.02	-0.16
ci@1:44459636:44460780:+|1:44459636:44459637:+.1	chr1:44459536-44460880	ENSG00000159214	CCDC24	coiled-coil domain containing 24	ci	NA	0.68	0.73	0.87	0.84	-0.19	-0.11	-0.16	-0.14
ci@1:45268527:45268627:+|1:45268527:45268528:+.1	chr1:45268427-45268727	ENSG00000173846	PLK3	polo-like kinase 3	ci	NA	0.75	1	1	1	-0.25	0	-0.25	0
ci@1:45798631:45798769:-|1:45798768:45798769:-.1	chr1:45798531-45798869	ENSG00000132781	MUTYH	mutY homolog (E. coli)	ci	NA	0.89	0.89	0.71	0.8	0.18	0.09	0.09	0.18
ci@1:46725771:46726214:+|1:46725771:46725772:+.1	chr1:46725671-46726314	ENSG00000085999	RAD54L	RAD54-like (S. cerevisiae)	ci	NA	0.85	0.8	0.9	0.98	-0.05	-0.18	-0.13	-0.1
ci@1:46733281:46736331:+|1:46733281:46733282:+.1	chr1:46733181-46736431	ENSG00000085999	RAD54L	RAD54-like (S. cerevisiae)	ci	NA	0.88	0.9	1	0.95	-0.12	-0.05	-0.07	-0.1
ci@1:46739137:46739296:+|1:46739137:46739138:+.1	chr1:46739037-46739396	ENSG00000085999	RAD54L	RAD54-like (S. cerevisiae)	ci	NA	0.82	0.67	0.86	0.85	-0.04	-0.18	-0.03	-0.19
ci@1:46874256:46874773:+|1:46874256:46874257:+.1	chr1:46874156-46874873	ENSG00000117480	FAAH	fatty acid amide hydrolase	ci	NA	0.91	1	0.72	0.85	0.19	0.15	0.06	0.28
ci@1:59004982:59012375:-|1:59012374:59012375:-.1	chr1:59004882-59012475	ENSG00000162600	OMA1	OMA1 zinc metallopeptidase homolog (S. cerevisiae)	ci	NA	0.77	0.56	0.85	0.82	-0.08	-0.26	-0.05	-0.29
ci@1:5924577:5925162:-|1:5925161:5925162:-.1	chr1:5924477-5925262	ENSG00000131697	NPHP4	nephronophthisis 4	ci	NA	0.98	0.87	0.98	0.93	0	-0.06	0.05	-0.11
ci@1:6522726:6522923:-|1:6522922:6522923:-.1	chr1:6522626-6523023	ENSG00000215788	TNFRSF25	tumor necrosis factor receptor superfamily, member 25	ci	NA	0.67	0.81	0.81	0.86	-0.14	-0.05	-0.19	0
ci@1:6641359:6642118:+|1:6641359:6641360:+.1	chr1:6641259-6642218	ENSG00000204859	ZBTB48	zinc finger and BTB domain containing 48	ci	NA	0.73	0.71	0.88	0.75	-0.15	-0.04	-0.02	-0.17
ci@1:6642359:6645979:+|1:6642359:6642360:+.1	chr1:6642259-6646079	ENSG00000204859	ZBTB48	zinc finger and BTB domain containing 48	ci	NA	0.67	0.61	0.92	0.74	-0.25	-0.13	-0.07	-0.31
ci@1:6653718:6655545:-|1:6655544:6655545:-.1	chr1:6653618-6655645	ENSG00000162413	KLHL21	kelch-like family member 21	ci	NA	0.87	0.8	0.94	0.9	-0.07	-0.1	-0.03	-0.14
ci@1:6713011:6713971:-|1:6713970:6713971:-.1	chr1:6712911-6714071	ENSG00000007923	DNAJC11	DnaJ (Hsp40) homolog, subfamily C, member 11	ci	NA	0.84	0.89	0.9	0.95	-0.06	-0.06	-0.11	-0.01
ci@1:67371058:67390345:-|1:67390344:67390345:-.1	chr1:67370958-67390445	ENSG00000152763	WDR78	WD repeat domain 78	ci	NA	0.66	0.6	0.92	0.84	-0.26	-0.24	-0.18	-0.32
ci@1:76255041:76255637:+|1:76255041:76255042:+.1	chr1:76254941-76255737	ENSG00000137955	RABGGTB	Rab geranylgeranyltransferase, beta subunit	ci	NA	0.85	0.87	0.97	0.93	-0.12	-0.06	-0.08	-0.1
ci@1:78324741:78324999:+|1:78324741:78324742:+.1	chr1:78324641-78325099	ENSG00000180488	FAM73A	family with sequence similarity 73, member A	ci	NA	0.97	0.88	1	0.99	-0.03	-0.11	-0.02	-0.12
ci@1:78412261:78413138:-|1:78413137:78413138:-.1	chr1:78412161-78413238	ENSG00000162613	FUBP1	far upstream element (FUSE) binding protein 1	ci	NA	0.14	0.12	0.34	0.2	-0.2	-0.08	-0.06	-0.22
ci@1:79125168:79126239:+|1:79125168:79125169:+.1	chr1:79125068-79126339	ENSG00000137965	IFI44	interferon-induced protein 44	ci	NA	0.79	0.74	0.89	0.85	-0.1	-0.11	-0.06	-0.15
ci@1:79126339:79128389:+|1:79126339:79126340:+.1	chr1:79126239-79128489	ENSG00000137965	IFI44	interferon-induced protein 44	ci	NA	0.56	0.62	0.75	0.67	-0.19	-0.05	-0.11	-0.13
ci@1:85634908:85643829:-|1:85643828:85643829:-.1	chr1:85634808-85643929	ENSG00000097096	SYDE2	synapse defective 1, Rho GTPase, homolog 2 (C. elegans)	ci	NA	0.75	0.46	0.71	0.79	0.04	-0.33	-0.04	-0.25
ci@1:85742480:85743324:+|1:85742480:85742481:+.1	chr1:85742380-85743424	ENSG00000223653	RP11-131L23.1	NA	ci	NA	0.86	0.82	0.69	0.38	0.17	0.44	0.48	0.13
ci@1:89294306:89298427:+|1:89294306:89294307:+.1	chr1:89294206-89298527	ENSG00000065243	PKN2	protein kinase N2	ci	NA	0.84	0.78	0.91	0.93	-0.07	-0.15	-0.09	-0.13
ci@1:897130:897206:+|1:897130:897131:+.1	chr1:897030-897306	ENSG00000187961	KLHL17	kelch-like family member 17	ci	NA	0.61	0.51	0.71	0.84	-0.1	-0.33	-0.23	-0.2
ci@1:90470597:90470692:+|1:90470597:90470598:+.1	chr1:90470497-90470792	ENSG00000162664	ZNF326	zinc finger protein 326	ci	NA	0.85	0.82	0.82	0.95	0.03	-0.13	-0.1	0
ci@1:91980554:91981351:+|1:91980554:91980555:+.1	chr1:91980454-91981451	ENSG00000097046	CDC7	cell division cycle 7	ci	NA	0.92	0.87	1	0.99	-0.08	-0.12	-0.07	-0.13
ci@1:934993:935072:-|1:935071:935072:-.1	chr1:934893-935172	ENSG00000188290	HES4	hairy and enhancer of split 4 (Drosophila)	ci	NA	0.35	0.33	0.53	0.45	-0.18	-0.12	-0.1	-0.2
ci@1:93575803:93575884:+|1:93575803:93575804:+.1	chr1:93575703-93575984	ENSG00000143033	MTF2	metal response element binding transcription factor 2	ci	NA	0.3	0.11	0.05	0.04	0.25	0.07	0.26	0.06
ci@1:93791452:93792159:-|1:93792158:93792159:-.1	chr1:93791352-93792259	ENSG00000223745	RP4-717I23.3	NA	ci	NA	0.61	0.67	0.9	0.63	-0.29	0.04	-0.02	-0.23
ci@1:94476485:94476818:-|1:94476817:94476818:-.1	chr1:94476385-94476918	ENSG00000198691	ABCA4	ATP-binding cassette, sub-family A (ABC1), member 4	ci	NA	0.84	0.78	1	0.86	-0.16	-0.08	-0.02	-0.22
ci@10:100011459:100012110:-|10:100012109:100012110:-.1	chr10:100011359-100012210	ENSG00000138131	LOXL4	lysyl oxidase-like 4	ci	NA	0.87	0.89	0.99	0.93	-0.12	-0.04	-0.06	-0.1
ci@10:100144824:100146958:-|10:100146957:100146958:-.1	chr10:100144724-100147058	ENSG00000119943	PYROXD2	pyridine nucleotide-disulphide oxidoreductase domain 2	ci	NA	0.94	1	0.88	0.97	0.06	0.03	-0.03	0.12
ci@10:102006692:102010005:-|10:102010004:102010005:-.1	chr10:102006592-102010105	ENSG00000095485	CWF19L1	CWF19-like 1, cell cycle control (S. pombe)	ci	NA	0.92	0.86	0.97	0.96	-0.05	-0.1	-0.04	-0.11
ci@10:102249155:102249460:-|10:102249459:102249460:-.1	chr10:102249055-102249560	ENSG00000075826	SEC31B	SEC31 homolog B (S. cerevisiae)	ci	NA	0.4	0.22	0.43	0.46	-0.03	-0.24	-0.06	-0.21
ci@10:102673007:102675756:+|10:102673007:102673008:+.1	chr10:102672907-102675856	ENSG00000119906	FAM178A	family with sequence similarity 178, member A	ci	NA	0.48	0.31	0.21	0.3	0.27	0.01	0.18	0.1
ci@10:102797188:102798400:+|10:102797188:102797189:+.1	chr10:102797088-102798500	ENSG00000107819	SFXN3	sideroflexin 3	ci	NA	0.71	0.63	0.82	0.85	-0.11	-0.22	-0.14	-0.19
ci@10:102821872:102822299:+|10:102821872:102821873:+.1	chr10:102821772-102822399	ENSG00000107821	KAZALD1	Kazal-type serine peptidase inhibitor domain 1	ci	NA	0.84	0.53	0.5	0.56	0.34	-0.03	0.28	0.03
ci@10:104159951:104160035:+|10:104159951:104159952:+.1	chr10:104159851-104160135	ENSG00000077150	NFKB2	nuclear factor of kappa light polypeptide gene enhancer in B-cells 2 (p49/p100)	ci	NA	0.95	0.82	0.93	0.98	0.02	-0.16	-0.03	-0.11
ci@10:105791351:105791962:-|10:105791961:105791962:-.1	chr10:105791251-105792062	ENSG00000065618	COL17A1	collagen, type XVII, alpha 1	ci	NA	0.03	0.1	0.3	0.15	-0.27	-0.05	-0.12	-0.2
ci@10:115618439:115636280:+|10:115618439:115618440:+.1	chr10:115618339-115636380	ENSG00000196865	NHLRC2	NHL repeat containing 2	ci	NA	0.98	0.98	0.83	0.99	0.15	-0.01	-0.01	0.15
ci@10:124640272:124641114:+|10:124640272:124640273:+.1	chr10:124640172-124641214	ENSG00000255624	RP11-564D11.3	NA	ci	NA	0.63	0.62	0.89	0.81	-0.26	-0.19	-0.18	-0.27
ci@10:124692177:124697221:-|10:124697220:124697221:-.1	chr10:124692077-124697321	ENSG00000119965	C10orf88	chromosome 10 open reading frame 88	ci	NA	0.7	0.7	0.9	0.79	-0.2	-0.09	-0.09	-0.2
ci@10:127429770:127431627:+|10:127429770:127429771:+.1	chr10:127429670-127431727	ENSG00000107938	C10orf137	chromosome 10 open reading frame 137	ci	NA	0.8	0.51	0.77	0.67	0.03	-0.16	0.13	-0.26
ci@10:127529899:127541694:+|10:127529899:127529900:+.1	chr10:127529799-127541794	ENSG00000107949	BCCIP	BRCA2 and CDKN1A interacting protein	ci	NA	0.49	0.43	0.6	0.47	-0.11	-0.04	0.02	-0.17
ci@10:127697835:127697942:+|10:127697835:127697836:+.1	chr10:127697735-127698042	ENSG00000203780	FANK1	fibronectin type III and ankyrin repeat domains 1	ci	NA	0.23	0.1	0.31	0.27	-0.08	-0.17	-0.04	-0.21
ci@10:135020855:135024115:+|10:135020855:135020856:+.1	chr10:135020755-135024215	ENSG00000171798	KNDC1	kinase non-catalytic C-lobe domain (KIND) containing 1	ci	NA	1	0.65	0.95	1	0.05	-0.35	0	-0.3
ci@10:14941684:14943132:+|10:14941684:14941685:+.1	chr10:14941584-14943232	ENSG00000152455	SUV39H2	suppressor of variegation 3-9 homolog 2 (Drosophila)	ci	NA	0.87	0.91	0.88	0.98	-0.01	-0.07	-0.11	0.03
ci@10:14943261:14944405:+|10:14943261:14943262:+.1	chr10:14943161-14944505	ENSG00000152455	SUV39H2	suppressor of variegation 3-9 homolog 2 (Drosophila)	ci	NA	0.91	0.84	0.93	0.95	-0.02	-0.11	-0.04	-0.09
ci@10:17636382:17641289:-|10:17641288:17641289:-.1	chr10:17636282-17641389	ENSG00000165996	PTPLA	protein tyrosine phosphatase-like (proline instead of catalytic arginine), member A	ci	NA	0.57	0.59	0.47	0.42	0.1	0.17	0.15	0.12
ci@10:22607642:22607735:+|10:22607642:22607643:+.1	chr10:22607542-22607835	ENSG00000148444	COMMD3	COMM domain containing 3	ci	NA	0.82	0.81	0.92	0.89	-0.1	-0.08	-0.07	-0.11
ci@10:24834032:24834756:+|10:24834032:24834033:+.1	chr10:24833932-24834856	ENSG00000120549	KIAA1217	KIAA1217	ci	NA	0.2	0.23	0.44	0.65	-0.24	-0.42	-0.45	-0.21
ci@10:27456203:27458873:+|10:27456203:27456204:+.1	chr10:27456103-27458973	ENSG00000120539	MASTL	microtubule associated serine/threonine kinase-like	ci	NA	0.87	0.76	0.91	0.74	-0.04	0.02	0.13	-0.15
ci@10:28813540:28814877:-|10:28814876:28814877:-.1	chr10:28813440-28814977	ENSG00000254635	WAC-AS1	NA	ci	NA	0.51	0.7	0.67	0.72	-0.16	-0.02	-0.21	0.03
ci@10:43047728:43047836:-|10:43047835:43047836:-.1	chr10:43047628-43047936	ENSG00000234420	ZNF37BP	NA	ci	NA	0.23	0.05	0.16	0	0.07	0.05	0.23	-0.11
ci@10:46112019:46113588:-|10:46113587:46113588:-.1	chr10:46111919-46113688	ENSG00000172671	ZFAND4	zinc finger, AN1-type domain 4	ci	NA	0.6	0.67	0.84	0.9	-0.24	-0.23	-0.3	-0.17
ci@10:58117946:58118138:-|10:58118137:58118138:-.1	chr10:58117846-58118238	ENSG00000122952	ZWINT	ZW10 interactor, kinetochore protein	ci	NA	0.85	0.88	0.96	0.94	-0.11	-0.06	-0.09	-0.08
ci@10:61412708:61413433:-|10:61413432:61413433:-.1	chr10:61412608-61413533	ENSG00000165449	SLC16A9	solute carrier family 16, member 9 (monocarboxylic acid transporter 9)	ci	NA	0.71	0.82	0.86	0.85	-0.15	-0.03	-0.14	-0.04
ci@10:6154324:6155471:+|10:6154324:6154325:+.1	chr10:6154224-6155571	ENSG00000134453	RBM17	RNA binding motif protein 17	ci	NA	0.82	0.8	0.91	0.89	-0.09	-0.09	-0.07	-0.11
ci@10:63996022:63999407:-|10:63999406:63999407:-.1	chr10:63995922-63999507	ENSG00000182010	RTKN2	rhotekin 2	ci	NA	0.7	0.44	0.4	0.71	0.3	-0.27	-0.01	0.04
ci@10:69833443:69834901:-|10:69834900:69834901:-.1	chr10:69833343-69835001	ENSG00000148634	HERC4	HECT and RLD domain containing E3 ubiquitin protein ligase 4	ci	NA	0.81	0.79	0.95	0.93	-0.14	-0.14	-0.12	-0.16
ci@10:70958308:70958860:+|10:70958308:70958309:+.1	chr10:70958208-70958960	ENSG00000156502	SUPV3L1	suppressor of var1, 3-like 1 (S. cerevisiae)	ci	NA	0.97	0.87	0.98	0.94	-0.01	-0.07	0.03	-0.11
ci@10:75473090:75477773:-|10:75477772:75477773:-.1	chr10:75472990-75477873	ENSG00000242288	RP11-464F9.1	NA	ci	NA	0.71	0.94	0.91	0.86	-0.2	0.08	-0.15	0.03
ci@10:75549582:75549714:+|10:75549582:75549583:+.1	chr10:75549482-75549814	ENSG00000214655	ZSWIM8	zinc finger, SWIM-type containing 8	ci	NA	0.78	0.87	0.93	0.93	-0.15	-0.06	-0.15	-0.06
ci@10:88728362:88729957:+|10:88728362:88728363:+.1	chr10:88728262-88730057	ENSG00000148671	C10orf116	chromosome 10 open reading frame 116	ci	NA	0.75	0.87	0.96	0.98	-0.21	-0.11	-0.23	-0.09
ci@10:92654648:92655211:+|10:92654648:92654649:+.1	chr10:92654548-92655311	ENSG00000148688	RPP30	ribonuclease P/MRP 30kDa subunit	ci	NA	0.77	0.82	0.91	0.85	-0.14	-0.03	-0.08	-0.09
ci@10:97960814:97963813:-|10:97963812:97963813:-.1	chr10:97960714-97963913	ENSG00000095585	BLNK	B-cell linker	ci	NA	0.84	0.79	1	0.97	-0.16	-0.18	-0.13	-0.21
ci@11:111170449:111171252:+|11:111170449:111170450:+.1	chr11:111170349-111171352	ENSG00000214290	C11orf93	chromosome 11 open reading frame 93	ci	NA	0.14	0.21	0.26	0.15	-0.12	0.06	-0.01	-0.05
ci@11:111175707:111177119:+|11:111175707:111175708:+.1	chr11:111175607-111177219	ENSG00000214290	C11orf93	chromosome 11 open reading frame 93	ci	NA	0.61	0.39	0.95	0.88	-0.34	-0.49	-0.27	-0.56
ci@11:111746828:111747205:-|11:111747204:111747205:-.1	chr11:111746728-111747305	ENSG00000255561	FDXACB1	ferredoxin-fold anticodon binding domain containing 1	ci	NA	0.77	0.9	0.82	1	-0.05	-0.1	-0.23	0.08
ci@11:111943929:111944704:-|11:111944703:111944704:-.1	chr11:111943829-111944804	ENSG00000150773	PIH1D2	PIH1 domain containing 2	ci	NA	0.75	0.88	0.57	0.93	0.18	-0.05	-0.18	0.31
ci@11:117063582:117063869:+|11:117063582:117063583:+.1	chr11:117063482-117063969	ENSG00000149577	SIDT2	SID1 transmembrane family, member 2	ci	NA	0.92	0.96	0.88	0.83	0.04	0.13	0.09	0.08
ci@11:117074600:117074931:+|11:117074600:117074601:+.1	chr11:117074500-117075031	ENSG00000149591	TAGLN	transgelin	ci	NA	0.99	0.88	0.99	0.97	0	-0.09	0.02	-0.11
ci@11:117160523:117161204:-|11:117161203:117161204:-.1	chr11:117160423-117161304	ENSG00000186318	BACE1	beta-site APP-cleaving enzyme 1	ci	NA	0.71	0.8	0.64	0.7	0.07	0.1	0.01	0.16
ci@11:117161765:117162428:-|11:117162427:117162428:-.1	chr11:117161665-117162528	ENSG00000186318	BACE1	beta-site APP-cleaving enzyme 1	ci	NA	0.69	0.69	0.54	0.65	0.15	0.04	0.04	0.15
ci@11:117162529:117163770:-|11:117163769:117163770:-.1	chr11:117162429-117163870	ENSG00000186318	BACE1	beta-site APP-cleaving enzyme 1	ci	NA	0.69	0.65	0.48	0.59	0.21	0.06	0.1	0.17
ci@11:117252584:117253512:+|11:117252584:117252585:+.1	chr11:117252484-117253612	ENSG00000110274	CEP164	centrosomal protein 164kDa	ci	NA	0.86	0.83	0.94	0.98	-0.08	-0.15	-0.12	-0.11
ci@11:118898582:118898904:-|11:118898903:118898904:-.1	chr11:118898482-118899004	ENSG00000137700	SLC37A4	NA	ci	NA	0.71	0.68	0.71	0.83	0	-0.15	-0.12	-0.03
ci@11:119063953:119064476:-|11:119064475:119064476:-.1	chr11:119063853-119064576	ENSG00000248712	CCDC153	coiled-coil domain containing 153	ci	NA	0.73	0.56	0.93	0.86	-0.2	-0.3	-0.13	-0.37
ci@11:124493129:124494827:+|11:124493129:124493130:+.1	chr11:124493029-124494927	ENSG00000154144	TBRG1	transforming growth factor beta regulator 1	ci	NA	0.56	0.56	0.71	0.76	-0.15	-0.2	-0.2	-0.15
ci@11:129734745:129734861:-|11:129734860:129734861:-.1	chr11:129734645-129734961	ENSG00000170322	NFRKB	nuclear factor related to kappaB binding protein	ci	NA	0.83	0.92	0.97	0.94	-0.14	-0.02	-0.11	-0.05
ci@11:134147806:134151271:+|11:134147806:134147807:+.1	chr11:134147706-134151371	ENSG00000166105	GLB1L3	galactosidase, beta 1-like 3	ci	NA	0.81	0.95	1	0.94	-0.19	0.01	-0.13	-0.05
ci@11:1578804:1579024:-|11:1579023:1579024:-.1	chr11:1578704-1579124	ENSG00000184545	DUSP8	dual specificity phosphatase 8	ci	NA	0.77	0.74	0.75	0.95	0.02	-0.21	-0.18	-0.01
ci@11:16807934:16810643:-|11:16810642:16810643:-.1	chr11:16807834-16810743	ENSG00000166689	PLEKHA7	pleckstrin homology domain containing, family A member 7	ci	NA	0.49	0.47	0.33	0.42	0.16	0.05	0.07	0.14
ci@11:17359081:17370892:+|11:17359081:17359082:+.1	chr11:17358981-17370992	ENSG00000070081	NUCB2	nucleobindin 2	ci	NA	0.56	0.68	0.97	0.65	-0.41	0.03	-0.09	-0.29
ci@11:18369466:18373428:+|11:18369466:18369467:+.1	chr11:18369366-18373528	ENSG00000110768	GTF2H1	general transcription factor IIH, polypeptide 1, 62kDa	ci	NA	0.83	0.81	0.92	0.89	-0.09	-0.08	-0.06	-0.11
ci@11:19177476:19180487:+|11:19177476:19177477:+.1	chr11:19177376-19180587	ENSG00000177054	ZDHHC13	zinc finger, DHHC-type containing 13	ci	NA	0.82	0.89	0.99	0.98	-0.17	-0.09	-0.16	-0.1
ci@11:19180587:19184850:+|11:19180587:19180588:+.1	chr11:19180487-19184950	ENSG00000177054	ZDHHC13	zinc finger, DHHC-type containing 13	ci	NA	0.87	0.88	0.97	0.98	-0.1	-0.1	-0.11	-0.09
ci@11:293502:293594:+|11:293502:293503:+.1	chr11:293402-293694	ENSG00000142102	ATHL1	ATH1, acid trehalase-like 1 (yeast)	ci	NA	0.44	0.48	0.65	0.68	-0.21	-0.2	-0.24	-0.17
ci@11:34176316:34180843:-|11:34180842:34180843:-.1	chr11:34176216-34180943	ENSG00000166016	ABTB2	ankyrin repeat and BTB (POZ) domain containing 2	ci	NA	0.92	0.99	0.93	0.84	-0.01	0.15	0.08	0.06
ci@11:3727857:3733794:-|11:3733793:3733794:-.1	chr11:3727757-3733894	ENSG00000110713	NUP98	nucleoporin 98kDa	ci	NA	0.81	0.8	0.76	0.71	0.05	0.09	0.1	0.04
ci@11:418813:418888:-|11:418887:418888:-.1	chr11:418713-418988	ENSG00000185101	ANO9	anoctamin 9	ci	NA	0.71	0.65	0.6	0.66	0.11	-0.01	0.05	0.05
ci@11:419729:420463:-|11:420462:420463:-.1	chr11:419629-420563	ENSG00000185101	ANO9	anoctamin 9	ci	NA	0.35	0.37	0.16	0.29	0.19	0.08	0.06	0.21
ci@11:420615:420718:-|11:420717:420718:-.1	chr11:420515-420818	ENSG00000185101	ANO9	anoctamin 9	ci	NA	0.68	0.64	0.39	0.57	0.29	0.07	0.11	0.25
ci@11:44100334:44101081:+|11:44100334:44100335:+.1	chr11:44100234-44101181	ENSG00000110455	ACCS	1-aminocyclopropane-1-carboxylate synthase homolog (Arabidopsis)(non-functional)	ci	NA	0.47	0.64	0.72	0.74	-0.25	-0.1	-0.27	-0.08
ci@11:45945828:45946057:+|11:45945828:45945829:+.1	chr11:45945728-45946157	ENSG00000165905	GYLTL1B	glycosyltransferase-like 1B	ci	NA	0.97	0.93	0.83	0.82	0.14	0.11	0.15	0.1
ci@11:46398762:46399748:+|11:46398762:46398763:+.1	chr11:46398662-46399848	ENSG00000149091	DGKZ	diacylglycerol kinase, zeta	ci	NA	0.86	0.82	0.93	0.88	-0.07	-0.06	-0.02	-0.11
ci@11:47159280:47176727:+|11:47159280:47159281:+.1	chr11:47159180-47176827	ENSG00000149179	C11orf49	chromosome 11 open reading frame 49	ci	NA	0.8	0.91	0.91	0.93	-0.11	-0.02	-0.13	0
ci@11:47289577:47289812:+|11:47289577:47289578:+.1	chr11:47289477-47289912	ENSG00000025434	NR1H3	nuclear receptor subfamily 1, group H, member 3	ci	NA	0.92	0.87	0.98	0.95	-0.06	-0.08	-0.03	-0.11
ci@11:555111:555305:-|11:555304:555305:-.1	chr11:555011-555405	ENSG00000185522	C11orf35	chromosome 11 open reading frame 35	ci	NA	0.78	0.94	0.98	0.95	-0.2	-0.01	-0.17	-0.04
ci@11:555503:555734:-|11:555733:555734:-.1	chr11:555403-555834	ENSG00000185522	C11orf35	chromosome 11 open reading frame 35	ci	NA	0.36	0.5	0.62	0.85	-0.26	-0.35	-0.49	-0.12
ci@11:555930:555996:-|11:555995:555996:-.1	chr11:555830-556096	ENSG00000185522	C11orf35	chromosome 11 open reading frame 35	ci	NA	0.8	0.54	0.9	0.83	-0.1	-0.29	-0.03	-0.36
ci@11:556588:556835:-|11:556834:556835:-.1	chr11:556488-556935	ENSG00000185522	C11orf35	chromosome 11 open reading frame 35	ci	NA	0.28	0.37	0.55	0.62	-0.27	-0.25	-0.34	-0.18
ci@11:557097:557399:-|11:557398:557399:-.1	chr11:556997-557499	ENSG00000185522	C11orf35	chromosome 11 open reading frame 35	ci	NA	0.71	0.86	0.77	0.63	-0.06	0.23	0.08	0.09
ci@11:558039:558161:-|11:558160:558161:-.1	chr11:557939-558261	ENSG00000185522	C11orf35	chromosome 11 open reading frame 35	ci	NA	0.56	0.61	0.82	0.88	-0.26	-0.27	-0.32	-0.21
ci@11:5662419:5663636:+|11:5662419:5662420:+.1	chr11:5662319-5663736	ENSG00000258588	TRIM6-TRIM34	TRIM6-TRIM34 readthrough	ci	NA	0.74	0.68	0.91	0.88	-0.17	-0.2	-0.14	-0.23
ci@11:5663736:5664047:+|11:5663736:5663737:+.1	chr11:5663636-5664147	ENSG00000258588	TRIM6-TRIM34	TRIM6-TRIM34 readthrough	ci	NA	0.56	0.75	0.75	0.81	-0.19	-0.06	-0.25	0
ci@11:5664073:5664374:+|11:5664073:5664074:+.1	chr11:5663973-5664474	ENSG00000258588	TRIM6-TRIM34	TRIM6-TRIM34 readthrough	ci	NA	0.8	0.81	0.98	0.92	-0.18	-0.11	-0.12	-0.17
ci@11:59556420:59557992:+|11:59556420:59556421:+.1	chr11:59556320-59558092	ENSG00000166900	STX3	syntaxin 3	ci	NA	0.92	0.93	0.9	0.82	0.02	0.11	0.1	0.03
ci@11:62344489:62344654:-|11:62344653:62344654:-.1	chr11:62344389-62344754	ENSG00000149016	TUT1	terminal uridylyl transferase 1, U6 snRNA-specific	ci	NA	0.9	0.96	0.8	0.89	0.1	0.07	0.01	0.16
ci@11:62344763:62346033:-|11:62346032:62346033:-.1	chr11:62344663-62346133	ENSG00000149016	TUT1	terminal uridylyl transferase 1, U6 snRNA-specific	ci	NA	0.94	0.92	0.82	0.82	0.12	0.1	0.12	0.1
ci@11:6236141:6238601:-|11:6238600:6238601:-.1	chr11:6236041-6238701	ENSG00000051009	FAM160A2	family with sequence similarity 160, member A2	ci	NA	0.37	0.37	0.67	0.58	-0.3	-0.21	-0.21	-0.3
ci@11:62376277:62376434:-|11:62376433:62376434:-.1	chr11:62376177-62376534	ENSG00000149499	EML3	echinoderm microtubule associated protein like 3	ci	NA	0.92	0.85	0.98	0.95	-0.06	-0.1	-0.03	-0.13
ci@11:62437275:62437354:-|11:62437353:62437354:-.1	chr11:62437175-62437454	ENSG00000162194	C11orf48	chromosome 11 open reading frame 48	ci	NA	0.74	0.72	0.55	0.61	0.19	0.11	0.13	0.17
ci@11:62553860:62553989:+|11:62553860:62553861:+.1	chr11:62553760-62554089	ENSG00000162227	TAF6L	TAF6-like RNA polymerase II, p300/CBP-associated factor (PCAF)-associated factor, 65kDa	ci	NA	0.87	0.89	0.75	0.63	0.12	0.26	0.24	0.14
ci@11:62566047:62567849:-|11:62567848:62567849:-.1	chr11:62565947-62567949	ENSG00000162231	NXF1	nuclear RNA export factor 1	ci	NA	0.64	0.67	0.81	0.75	-0.17	-0.08	-0.11	-0.14
ci@11:63586474:63594400:+|11:63586474:63586475:+.1	chr11:63586374-63594500	ENSG00000168005	C11orf84	chromosome 11 open reading frame 84	ci	NA	0.89	0.92	0.96	1	-0.07	-0.08	-0.11	-0.04
ci@11:63766508:63766803:-|11:63766802:63766803:-.1	chr11:63766408-63766903	ENSG00000133315	MACROD1	MACRO domain containing 1	ci	NA	0.88	0.79	0.95	0.94	-0.07	-0.15	-0.06	-0.16
ci@11:63997791:63997904:+|11:63997791:63997792:+.1	chr11:63997691-63998004	ENSG00000110011	DNAJC4	DnaJ (Hsp40) homolog, subfamily C, member 4	ci	NA	0.5	0.77	0.67	0.85	-0.17	-0.08	-0.35	0.1
ci@11:64698961:64699031:+|11:64698961:64698962:+.1	chr11:64698861-64699131	ENSG00000068971	PPP2R5B	protein phosphatase 2, regulatory subunit B', beta	ci	NA	0.85	0.91	0.68	0.58	0.17	0.33	0.27	0.23
ci@11:65319035:65319443:-|11:65319442:65319443:-.1	chr11:65318935-65319543	ENSG00000168056	LTBP3	latent transforming growth factor beta binding protein 3	ci	NA	0.82	0.81	0.83	0.93	-0.01	-0.12	-0.11	-0.02
ci@11:66131895:66133407:-|11:66133406:66133407:-.1	chr11:66131795-66133507	ENSG00000174669	SLC29A2	solute carrier family 29 (nucleoside transporters), member 2	ci	NA	0.77	0.76	0.88	0.81	-0.11	-0.05	-0.04	-0.12
ci@11:66288847:66290927:+|11:66288847:66288848:+.1	chr11:66288747-66291027	ENSG00000256349	BBS1	Bardet-Biedl syndrome 1 protein	ci	NA	0.75	0.77	0.61	0.78	0.14	-0.01	-0.03	0.16
ci@11:67059651:67066529:+|11:67059651:67059652:+.1	chr11:67059551-67066629	ENSG00000172932	ANKRD13D	ankyrin repeat domain 13 family, member D	ci	NA	0.78	0.84	0.94	0.88	-0.16	-0.04	-0.1	-0.1
ci@11:67160253:67160967:+|11:67160253:67160254:+.1	chr11:67160153-67161067	ENSG00000172613	RAD9A	RAD9 homolog A (S. pombe)	ci	NA	0.57	0.53	0.57	0.75	0	-0.22	-0.18	-0.04
ci@11:67810498:67810838:+|11:67810498:67810499:+.1	chr11:67810398-67810938	ENSG00000110719	TCIRG1	T-cell, immune regulator 1, ATPase, H+ transporting, lysosomal V0 subunit A3	ci	NA	0.32	0.36	0.43	0.5	-0.11	-0.14	-0.18	-0.07
ci@11:67816761:67817130:+|11:67816761:67816762:+.1	chr11:67816661-67817230	ENSG00000110719	TCIRG1	T-cell, immune regulator 1, ATPase, H+ transporting, lysosomal V0 subunit A3	ci	NA	0.69	0.65	0.79	0.76	-0.1	-0.11	-0.07	-0.14
ci@11:68483407:68506168:-|11:68506167:68506168:-.1	chr11:68483307-68506268	ENSG00000132749	MTL5	metallothionein-like 5, testis-specific (tesmin)	ci	NA	0.88	0.78	0.65	0.73	0.23	0.05	0.15	0.13
ci@11:68512579:68514676:-|11:68514675:68514676:-.1	chr11:68512479-68514776	ENSG00000132749	MTL5	metallothionein-like 5, testis-specific (tesmin)	ci	NA	0.26	0.27	0.51	0.56	-0.25	-0.29	-0.3	-0.24
ci@11:68679071:68682291:+|11:68679071:68679072:+.1	chr11:68678971-68682391	ENSG00000132740	IGHMBP2	immunoglobulin mu binding protein 2	ci	NA	0.97	0.86	0.89	0.97	0.08	-0.11	0	-0.03
ci@11:700707:702945:+|11:700707:700708:+.1	chr11:700607-703045	ENSG00000177042	TMEM80	transmembrane protein 80	ci	NA	0.59	0.52	0.78	0.69	-0.19	-0.17	-0.1	-0.26
ci@11:71712370:71712451:+|11:71712370:71712371:+.1	chr11:71712270-71712551	ENSG00000137496	IL18BP	interleukin 18 binding protein	ci	NA	0.76	0.75	0.85	1	-0.09	-0.25	-0.24	-0.1
ci@11:71940274:71940509:+|11:71940274:71940275:+.1	chr11:71940174-71940609	ENSG00000165458	INPPL1	inositol polyphosphate phosphatase-like 1	ci	NA	0.85	0.82	0.94	0.93	-0.09	-0.11	-0.08	-0.12
ci@11:72532786:72533089:+|11:72532786:72532787:+.1	chr11:72532686-72533189	ENSG00000168010	ATG16L2	autophagy related 16-like 2 (S. cerevisiae)	ci	NA	0.85	0.83	0.6	0.57	0.25	0.26	0.28	0.23
ci@11:72534006:72535105:+|11:72534006:72534007:+.1	chr11:72533906-72535205	ENSG00000168010	ATG16L2	autophagy related 16-like 2 (S. cerevisiae)	ci	NA	0.27	0.21	0.59	0.52	-0.32	-0.31	-0.25	-0.38
ci@11:72535167:72535779:+|11:72535167:72535168:+.1	chr11:72535067-72535879	ENSG00000168010	ATG16L2	autophagy related 16-like 2 (S. cerevisiae)	ci	NA	0.5	0.36	0.7	0.66	-0.2	-0.3	-0.16	-0.34
ci@11:73100226:73101596:+|11:73100226:73100227:+.1	chr11:73100126-73101696	ENSG00000054967	RELT	RELT tumor necrosis factor receptor	ci	NA	0.94	0.85	0.97	1	-0.03	-0.15	-0.06	-0.12
ci@11:800014:800131:-|11:800130:800131:-.1	chr11:799914-800231	ENSG00000177595	PIDD	p53-induced death domain protein	ci	NA	0.85	0.72	0.61	0.77	0.24	-0.05	0.08	0.11
ci@11:82783188:82783665:+|11:82783188:82783189:+.1	chr11:82783088-82783765	ENSG00000246067	RP11-113K21.5	NA	ci	NA	0.76	0.71	0.83	0.86	-0.07	-0.15	-0.1	-0.12
ci@11:82783846:82784345:+|11:82783846:82783847:+.1	chr11:82783746-82784445	ENSG00000246067	RP11-113K21.5	NA	ci	NA	0.79	0.81	0.93	0.92	-0.14	-0.11	-0.13	-0.12
ci@11:828963:829360:+|11:828963:828964:+.1	chr11:828863-829460	ENSG00000177685	EFCAB4A	EF-hand calcium binding domain 4A	ci	NA	0.72	0.69	0.81	0.86	-0.09	-0.17	-0.14	-0.12
ci@11:85374645:85374859:-|11:85374858:85374859:-.1	chr11:85374545-85374959	ENSG00000137504	CREBZF	CREB/ATF bZIP transcription factor	ci	NA	0.17	0.18	0.3	0.23	-0.13	-0.05	-0.06	-0.12
ci@11:8669633:8669963:-|11:8669962:8669963:-.1	chr11:8669533-8670063	ENSG00000166436	TRIM66	tripartite motif containing 66	ci	NA	0.9	0.97	0.76	0.73	0.14	0.24	0.17	0.21
ci@11:9164392:9164950:-|11:9164949:9164950:-.1	chr11:9164292-9165050	ENSG00000184014	DENND5A	DENN/MADD domain containing 5A	ci	NA	0.85	0.85	0.97	0.94	-0.12	-0.09	-0.09	-0.12
ci@11:9310082:9316806:-|11:9316805:9316806:-.1	chr11:9309982-9316906	ENSG00000166471	TMEM41B	transmembrane protein 41B	ci	NA	0.87	0.92	0.91	0.8	-0.04	0.12	0.07	0.01
ci@11:93461987:93462600:+|11:93461987:93461988:+.1	chr11:93461887-93462700	ENSG00000166004	KIAA1731	KIAA1731	ci	NA	0.88	0.93	0.8	0.84	0.08	0.09	0.04	0.13
ci@11:93467826:93469307:-|11:93469306:93469307:-.1	chr11:93467726-93469407	ENSG00000166012	TAF1D	TATA box binding protein (TBP)-associated factor, RNA polymerase I, D, 41kDa	ci	NA	0.64	0.56	0.58	0.5	0.06	0.06	0.14	-0.02
ci@11:95521727:95522556:-|11:95522555:95522556:-.1	chr11:95521627-95522656	ENSG00000077458	FAM76B	family with sequence similarity 76, member B	ci	NA	0.86	0.82	0.9	0.97	-0.04	-0.15	-0.11	-0.08
ci@11:96117925:96119418:-|11:96119417:96119418:-.1	chr11:96117825-96119518	ENSG00000149231	CCDC82	coiled-coil domain containing 82	ci	NA	0.86	0.93	0.98	0.96	-0.12	-0.03	-0.1	-0.05
ci@12:102120182:102122679:+|12:102120182:102120183:+.1	chr12:102120082-102122779	ENSG00000111666	CHPT1	choline phosphotransferase 1	ci	NA	0.71	0.62	0.77	0.76	-0.06	-0.14	-0.05	-0.15
ci@12:109183020:109186062:-|12:109186061:109186062:-.1	chr12:109182920-109186162	ENSG00000084112	SSH1	slingshot homolog 1 (Drosophila)	ci	NA	0.97	0.94	0.86	0.87	0.11	0.07	0.1	0.08
ci@12:11035087:11035151:-|12:11035150:11035151:-.1	chr12:11034987-11035251	ENSG00000231887	PRH1	proline-rich protein HaeIII subfamily 1	ci	NA	0.94	0	0	0	0.94	0	0.94	0
ci@12:110812138:110813871:-|12:110813870:110813871:-.1	chr12:110812038-110813971	ENSG00000196510	ANAPC7	anaphase promoting complex subunit 7	ci	NA	0.79	0.81	0.9	0.84	-0.11	-0.03	-0.05	-0.09
ci@12:111066723:111070277:+|12:111066723:111066724:+.1	chr12:111066623-111070377	ENSG00000204852	TCTN1	tectonic family member 1	ci	NA	0.86	0.82	0.95	0.97	-0.09	-0.15	-0.11	-0.13
ci@12:113565983:113568690:-|12:113568689:113568690:-.1	chr12:113565883-113568790	ENSG00000111344	RASAL1	RAS protein activator like 1 (GAP1 like)	ci	NA	0.78	0.86	1	0.91	-0.22	-0.05	-0.13	-0.14
ci@12:118627746:118636856:-|12:118636855:118636856:-.1	chr12:118627646-118636956	ENSG00000135090	TAOK3	TAO kinase 3	ci	NA	0.98	0.9	0.86	0.95	0.12	-0.05	0.03	0.04
ci@12:122239714:122240537:-|12:122240536:122240537:-.1	chr12:122239614-122240637	ENSG00000212694	AC084018.1	NA	ci	NA	0.21	0.41	0.54	0.57	-0.33	-0.16	-0.36	-0.13
ci@12:124090528:124090620:+|12:124090528:124090529:+.1	chr12:124090428-124090720	ENSG00000111364	DDX55	DEAD (Asp-Glu-Ala-Asp) box polypeptide 55	ci	NA	0.82	0.95	0.94	0.81	-0.12	0.14	0.01	0.01
ci@12:124239084:124241362:+|12:124239084:124239085:+.1	chr12:124238984-124241462	ENSG00000185344	ATP6V0A2	ATPase, H+ transporting, lysosomal V0 subunit a2	ci	NA	0.88	0.83	0.96	0.83	-0.08	0	0.05	-0.13
ci@12:132329994:132334347:+|12:132329994:132329995:+.1	chr12:132329894-132334447	ENSG00000198598	MMP17	matrix metallopeptidase 17 (membrane-inserted)	ci	NA	0.81	0.61	0.88	0.82	-0.07	-0.21	-0.01	-0.27
ci@12:133311161:133311992:-|12:133311991:133311992:-.1	chr12:133311061-133312092	ENSG00000176915	ANKLE2	ankyrin repeat and LEM domain containing 2	ci	NA	0.73	0.7	0.78	0.8	-0.05	-0.1	-0.07	-0.08
ci@12:19671047:19671609:+|12:19671047:19671048:+.1	chr12:19670947-19671709	ENSG00000139154	AEBP2	AE binding protein 2	ci	NA	0.52	0.48	0.64	0.54	-0.12	-0.06	-0.02	-0.16
ci@12:21623280:21623903:-|12:21623902:21623903:-.1	chr12:21623180-21624003	ENSG00000004700	RECQL	RecQ protein-like (DNA helicase Q1-like)	ci	NA	0.82	0.82	0.7	0.75	0.12	0.07	0.07	0.12
ci@12:22697113:22697254:-|12:22697253:22697254:-.1	chr12:22697013-22697354	ENSG00000111731	C2CD5	C2 calcium-dependent domain containing 5	ci	NA	0.96	0.96	0.81	0.91	0.15	0.05	0.05	0.15
ci@12:2933109:2933256:+|12:2933109:2933110:+.1	chr12:2933009-2933356	ENSG00000111203	ITFG2	integrin alpha FG-GAP repeat containing 2	ci	NA	0.78	0.85	0.96	0.91	-0.18	-0.06	-0.13	-0.11
ci@12:31213704:31226129:-|12:31226128:31226129:-.1	chr12:31213604-31226229	ENSG00000245614	DDX11-AS1	NA	ci	NA	0.74	0.65	0.94	0.95	-0.2	-0.3	-0.21	-0.29
ci@12:39713815:39716470:-|12:39716469:39716470:-.1	chr12:39713715-39716570	ENSG00000139116	KIF21A	kinesin family member 21A	ci	NA	0.78	0.88	0.75	0.66	0.03	0.22	0.12	0.13
ci@12:44124505:44125508:-|12:44125507:44125508:-.1	chr12:44124405-44125608	ENSG00000129317	PUS7L	pseudouridylate synthase 7 homolog (S. cerevisiae)-like	ci	NA	0.85	0.92	1	0.86	-0.15	0.06	-0.01	-0.08
ci@12:44166875:44167768:+|12:44166875:44166876:+.1	chr12:44166775-44167868	ENSG00000198001	IRAK4	interleukin-1 receptor-associated kinase 4	ci	NA	0.74	0.64	0.96	0.83	-0.22	-0.19	-0.09	-0.32
ci@12:47473508:47497896:+|12:47473508:47473509:+.1	chr12:47473408-47497996	ENSG00000179715	PCED1B	PC-esterase domain containing 1B	ci	NA	0.09	0.08	0.32	0.31	-0.23	-0.23	-0.22	-0.24
ci@12:49723774:49723928:+|12:49723774:49723775:+.1	chr12:49723674-49724028	ENSG00000135451	TROAP	trophinin associated protein	ci	NA	0.57	0.63	0.81	0.77	-0.24	-0.14	-0.2	-0.18
ci@12:49725190:49725356:+|12:49725190:49725191:+.1	chr12:49725090-49725456	ENSG00000135451	TROAP	trophinin associated protein	ci	NA	0.95	0.81	0.98	0.89	-0.03	-0.08	0.06	-0.17
ci@12:49743495:49745100:+|12:49743495:49743496:+.1	chr12:49743395-49745200	ENSG00000178401	DNAJC22	DnaJ (Hsp40) homolog, subfamily C, member 22	ci	NA	0.75	0.86	0.81	0.91	-0.06	-0.05	-0.16	0.05
ci@12:50025708:50026379:+|12:50025708:50025709:+.1	chr12:50025608-50026479	ENSG00000110844	PRPF40B	PRP40 pre-mRNA processing factor 40 homolog B (S. cerevisiae)	ci	NA	0.62	0.77	0.82	0.79	-0.2	-0.02	-0.17	-0.05
ci@12:50185834:50186229:-|12:50186228:50186229:-.1	chr12:50185734-50186329	ENSG00000167566	NCKAP5L	NCK-associated protein 5-like	ci	NA	0.79	0.69	0.81	0.89	-0.02	-0.2	-0.1	-0.12
ci@12:51373841:51375422:-|12:51375421:51375422:-.1	chr12:51373741-51375522	ENSG00000110911	SLC11A2	solute carrier family 11 (proton-coupled divalent metal ion transporters), member 2	ci	NA	0.02	0.05	0.15	0.1	-0.13	-0.05	-0.08	-0.1
ci@12:51449804:51449927:+|12:51449804:51449805:+.1	chr12:51449704-51450027	ENSG00000050426	LETMD1	LETM1 domain containing 1	ci	NA	0.93	0.91	0.9	0.83	0.03	0.08	0.1	0.01
ci@12:51868231:51868829:+|12:51868231:51868232:+.1	chr12:51868131-51868929	ENSG00000050438	SLC4A8	solute carrier family 4, sodium bicarbonate cotransporter, member 8	ci	NA	0.96	0.97	0.77	0.9	0.19	0.07	0.06	0.2
ci@12:52699188:52699447:+|12:52699188:52699189:+.1	chr12:52699088-52699547	ENSG00000170442	KRT86	keratin 86	ci	NA	0	0.13	0.72	0.38	-0.72	-0.25	-0.38	-0.59
ci@12:52699572:52699844:+|12:52699572:52699573:+.1	chr12:52699472-52699944	ENSG00000170442	KRT86	keratin 86	ci	NA	0.03	0	0.25	0.25	-0.22	-0.25	-0.22	-0.25
ci@12:52700064:52702017:+|12:52700064:52700065:+.1	chr12:52699964-52702117	ENSG00000170442	KRT86	keratin 86	ci	NA	0.08	0.04	0.33	0.13	-0.25	-0.09	-0.05	-0.29
ci@12:52702048:52702188:+|12:52702048:52702049:+.1	chr12:52701948-52702288	ENSG00000170442	KRT86	keratin 86	ci	NA	0.19	0.14	0.48	0.3	-0.29	-0.16	-0.11	-0.34
ci@12:53447233:53447558:+|12:53447233:53447234:+.1	chr12:53447133-53447658	ENSG00000111077	TENC1	tensin like C1 domain containing phosphatase (tensin 2)	ci	NA	0.4	0.54	0.19	0.33	0.21	0.21	0.07	0.35
ci@12:53575776:53578675:+|12:53575776:53575777:+.1	chr12:53575676-53578775	ENSG00000139651	ZNF740	zinc finger protein 740	ci	NA	0.85	0.88	0.96	0.92	-0.11	-0.04	-0.07	-0.08
ci@12:53666641:53668601:+|12:53666641:53666642:+.1	chr12:53666541-53668701	ENSG00000135476	ESPL1	extra spindle pole bodies homolog 1 (S. cerevisiae)	ci	NA	0.89	0.82	1	0.93	-0.11	-0.11	-0.04	-0.18
ci@12:53683378:53683869:+|12:53683378:53683379:+.1	chr12:53683278-53683969	ENSG00000135476	ESPL1	extra spindle pole bodies homolog 1 (S. cerevisiae)	ci	NA	0.94	0.78	0.96	1	-0.02	-0.22	-0.06	-0.18
ci@12:53880406:53880731:-|12:53880730:53880731:-.1	chr12:53880306-53880831	ENSG00000139625	MAP3K12	mitogen-activated protein kinase kinase kinase 12	ci	NA	0.48	0.64	0.34	0.27	0.14	0.37	0.21	0.3
ci@12:54107684:54107917:-|12:54107916:54107917:-.1	chr12:54107584-54108017	ENSG00000012822	CALCOCO1	calcium binding and coiled-coil domain 1	ci	NA	0.69	0.72	0.75	0.8	-0.06	-0.08	-0.11	-0.03
ci@12:54680516:54680737:+|12:54680516:54680517:+.1	chr12:54680416-54680837	ENSG00000135486	HNRNPA1	heterogeneous nuclear ribonucleoprotein A1	ci	NA	0.76	0.69	0.77	0.82	-0.01	-0.13	-0.06	-0.08
ci@12:550162:550940:+|12:550162:550163:+.1	chr12:550062-551040	ENSG00000120647	CCDC77	coiled-coil domain containing 77	ci	NA	0.9	0.85	0.9	1	0	-0.15	-0.1	-0.05
ci@12:56081880:56081986:-|12:56081985:56081986:-.1	chr12:56081780-56082086	ENSG00000135424	ITGA7	integrin, alpha 7	ci	NA	0.66	0.43	0.56	0.32	0.1	0.11	0.34	-0.13
ci@12:56115731:56117670:+|12:56115731:56115732:+.1	chr12:56115631-56117770	ENSG00000135437	RDH5	retinol dehydrogenase 5 (11-cis/9-cis)	ci	NA	0.68	0.58	0.77	0.72	-0.09	-0.14	-0.04	-0.19
ci@12:56117833:56118106:+|12:56117833:56117834:+.1	chr12:56117733-56118206	ENSG00000135437	RDH5	retinol dehydrogenase 5 (11-cis/9-cis)	ci	NA	0.8	0.77	0.75	0.69	0.05	0.08	0.11	0.02
ci@12:56216259:56216356:-|12:56216355:56216356:-.1	chr12:56216159-56216456	ENSG00000135392	DNAJC14	DnaJ (Hsp40) homolog, subfamily C, member 14	ci	NA	0.78	0.84	0.85	0.72	-0.07	0.12	0.06	-0.01
ci@12:56346215:56346518:+|12:56346215:56346216:+.1	chr12:56346115-56346618	ENSG00000065357	DGKA	diacylglycerol kinase, alpha 80kDa	ci	NA	0.91	0.87	0.98	0.97	-0.07	-0.1	-0.06	-0.11
ci@12:56712965:56713092:-|12:56713091:56713092:-.1	chr12:56712865-56713192	ENSG00000135473	PAN2	PAN2 poly(A) specific ribonuclease subunit homolog (S. cerevisiae)	ci	NA	0.54	0.56	0.39	0.55	0.15	0.01	-0.01	0.17
ci@12:56716542:56716846:-|12:56716845:56716846:-.1	chr12:56716442-56716946	ENSG00000135473	PAN2	PAN2 poly(A) specific ribonuclease subunit homolog (S. cerevisiae)	ci	NA	0.39	0.25	0.26	0.47	0.13	-0.22	-0.08	-0.01
ci@12:56716542:56716846:-|12:56716845:56716846:-.1	chr12:56716442-56716946	ENSG00000135473	PAN2	PAN2 poly(A) specific ribonuclease subunit homolog (S. cerevisiae)	ci	NA	0.39	0.25	0.26	0.47	0.13	-0.22	-0.08	-0.01
ci@12:56720193:56720401:-|12:56720400:56720401:-.1	chr12:56720093-56720501	ENSG00000135473	PAN2	PAN2 poly(A) specific ribonuclease subunit homolog (S. cerevisiae)	ci	NA	0.73	0.61	0.76	0.8	-0.03	-0.19	-0.07	-0.15
ci@12:56743045:56743210:-|12:56743209:56743210:-.1	chr12:56742945-56743310	ENSG00000170581	STAT2	signal transducer and activator of transcription 2, 113kDa	ci	NA	0.78	0.79	0.8	0.89	-0.02	-0.1	-0.11	-0.01
ci@12:56743420:56743881:-|12:56743880:56743881:-.1	chr12:56743320-56743981	ENSG00000170581	STAT2	signal transducer and activator of transcription 2, 113kDa	ci	NA	0.88	0.79	0.92	0.91	-0.04	-0.12	-0.03	-0.13
ci@12:56743974:56744196:-|12:56744195:56744196:-.1	chr12:56743874-56744296	ENSG00000170581	STAT2	signal transducer and activator of transcription 2, 113kDa	ci	NA	0.57	0.57	0.77	0.72	-0.2	-0.15	-0.15	-0.2
ci@12:56748647:56749060:-|12:56749059:56749060:-.1	chr12:56748547-56749160	ENSG00000170581	STAT2	signal transducer and activator of transcription 2, 113kDa	ci	NA	0.55	0.56	0.73	0.76	-0.18	-0.2	-0.21	-0.17
ci@12:56865427:56865557:-|12:56865556:56865557:-.1	chr12:56865327-56865657	ENSG00000135423	GLS2	glutaminase 2 (liver, mitochondrial)	ci	NA	0.94	0.91	0.96	0.72	-0.02	0.19	0.22	-0.05
ci@12:56865620:56865903:-|12:56865902:56865903:-.1	chr12:56865520-56866003	ENSG00000135423	GLS2	glutaminase 2 (liver, mitochondrial)	ci	NA	0.89	0.74	0.91	0.68	-0.02	0.06	0.21	-0.17
ci@12:56867378:56868328:-|12:56868327:56868328:-.1	chr12:56867278-56868428	ENSG00000135423	GLS2	glutaminase 2 (liver, mitochondrial)	ci	NA	0.8	0.6	0.64	0.47	0.16	0.13	0.33	-0.04
ci@12:58001396:58002303:+|12:58001396:58001397:+.1	chr12:58001296-58002403	ENSG00000178498	DTX3	deltex homolog 3 (Drosophila)	ci	NA	0.98	0.98	0.87	0.91	0.11	0.07	0.07	0.11
ci@12:58194995:58195943:-|12:58195942:58195943:-.1	chr12:58194895-58196043	ENSG00000135407	AVIL	advillin	ci	NA	0.44	0.52	0.64	0.88	-0.2	-0.36	-0.44	-0.12
ci@12:58339456:58340778:+|12:58339456:58339457:+.1	chr12:58339356-58340878	ENSG00000166896	XRCC6BP1	XRCC6 binding protein 1	ci	NA	0.87	0.93	1	1	-0.13	-0.07	-0.13	-0.07
ci@12:6575166:6575391:-|12:6575390:6575391:-.1	chr12:6575066-6575491	ENSG00000139190	VAMP1	vesicle-associated membrane protein 1 (synaptobrevin 1)	ci	NA	0.69	0.76	0.79	0.93	-0.1	-0.17	-0.24	-0.03
ci@12:68709045:68709858:-|12:68709857:68709858:-.1	chr12:68708945-68709958	ENSG00000111554	MDM1	Mdm1 nuclear protein homolog (mouse)	ci	NA	0.75	0.86	0.87	0.96	-0.12	-0.1	-0.21	-0.01
ci@12:6982161:6982410:-|12:6982409:6982410:-.1	chr12:6982061-6982510	ENSG00000111671	SPSB2	splA/ryanodine receptor domain and SOCS box containing 2	ci	NA	0.29	0.2	0.29	0.35	0	-0.15	-0.06	-0.09
ci@12:70724249:70726547:+|12:70724249:70724250:+.1	chr12:70724149-70726647	ENSG00000111596	CNOT2	CCR4-NOT transcription complex, subunit 2	ci	NA	0.84	0.89	0.96	0.9	-0.12	-0.01	-0.06	-0.07
ci@12:7086424:7086529:-|12:7086528:7086529:-.1	chr12:7086324-7086629	ENSG00000111684	LPCAT3	lysophosphatidylcholine acyltransferase 3	ci	NA	0.58	0.67	0.78	0.7	-0.2	-0.03	-0.12	-0.11
ci@12:72004345:72004475:-|12:72004474:72004475:-.1	chr12:72004245-72004575	ENSG00000133858	ZFC3H1	zinc finger, C3H1-type containing	ci	NA	0.68	0.74	0.85	0.81	-0.17	-0.07	-0.13	-0.11
ci@12:72004877:72005566:-|12:72005565:72005566:-.1	chr12:72004777-72005666	ENSG00000133858	ZFC3H1	zinc finger, C3H1-type containing	ci	NA	0.72	0.68	0.85	0.83	-0.13	-0.15	-0.11	-0.17
ci@12:75892500:75892604:+|12:75892500:75892501:+.1	chr12:75892400-75892704	ENSG00000139278	GLIPR1	GLI pathogenesis-related 1	ci	NA	0.45	0.35	0.43	0.23	0.02	0.12	0.22	-0.08
ci@12:76441498:76442173:-|12:76442172:76442173:-.1	chr12:76441398-76442273	ENSG00000187109	NAP1L1	nucleosome assembly protein 1-like 1	ci	NA	0.54	0.47	0.58	0.51	-0.04	-0.04	0.03	-0.11
ci@12:77236761:77239489:+|12:77236761:77236762:+.1	chr12:77236661-77239589	ENSG00000186908	ZDHHC17	zinc finger, DHHC-type containing 17	ci	NA	0.48	0.66	0.84	0.66	-0.36	0	-0.18	-0.18
ci@12:8388330:8391263:-|12:8391262:8391263:-.1	chr12:8388230-8391363	ENSG00000164845	FAM86FP	NA	ci	NA	0.62	0.62	1	0.62	-0.38	0	0	-0.38
ci@12:9085946:9086461:+|12:9085946:9085947:+.1	chr12:9085846-9086561	ENSG00000111752	PHC1	polyhomeotic homolog 1 (Drosophila)	ci	NA	0.72	0.74	0.85	0.88	-0.13	-0.14	-0.16	-0.11
ci@12:9447570:9450377:+|12:9447570:9447571:+.1	chr12:9447470-9450477	ENSG00000111788	RP11-22B23.1	NA	ci	NA	0.73	0.67	0.94	0.92	-0.21	-0.25	-0.19	-0.27
ci@12:94794757:94796946:-|12:94796945:94796946:-.1	chr12:94794657-94797046	ENSG00000173588	CCDC41	coiled-coil domain containing 41	ci	NA	0.91	0.85	0.96	1	-0.05	-0.15	-0.09	-0.11
ci@12:95451654:95452086:-|12:95452085:95452086:-.1	chr12:95451554-95452186	ENSG00000120798	NR2C1	nuclear receptor subfamily 2, group C, member 1	ci	NA	0.64	0.75	0.72	0.58	-0.08	0.17	0.06	0.03
ci@12:9573260:9573984:-|12:9573983:9573984:-.1	chr12:9573160-9574084	ENSG00000214826	DDX12P	NA	ci	NA	0.22	0.29	0.53	0.42	-0.31	-0.13	-0.2	-0.24
ci@12:96674057:96674586:-|12:96674585:96674586:-.1	chr12:96673957-96674686	ENSG00000059758	CDK17	cyclin-dependent kinase 17	ci	NA	0.67	0.67	0.69	0.85	-0.02	-0.18	-0.18	-0.02
ci@13:107209479:107211780:-|13:107211779:107211780:-.1	chr13:107209379-107211880	ENSG00000134884	ARGLU1	arginine and glutamate rich 1	ci	NA	0.34	0.36	0.45	0.47	-0.11	-0.11	-0.13	-0.09
ci@13:111286942:111287019:+|13:111286942:111286943:+.1	chr13:111286842-111287119	ENSG00000213995	CARKD	carbohydrate kinase domain containing	ci	NA	0.76	0.65	0.7	0.85	0.06	-0.2	-0.09	-0.05
ci@13:111933024:111935486:+|13:111933024:111933025:+.1	chr13:111932924-111935586	ENSG00000102606	ARHGEF7	Rho guanine nucleotide exchange factor (GEF) 7	ci	NA	0.62	0.63	0.82	0.86	-0.2	-0.23	-0.24	-0.19
ci@13:113208496:113209201:-|13:113209200:113209201:-.1	chr13:113208396-113209301	ENSG00000126216	TUBGCP3	tubulin, gamma complex associated protein 3	ci	NA	0.89	0.87	0.98	0.93	-0.09	-0.06	-0.04	-0.11
ci@13:113532617:113536190:+|13:113532617:113532618:+.1	chr13:113532517-113536290	ENSG00000068650	ATP11A	ATPase, class VI, type 11A	ci	NA	0.05	0.09	0.29	0.2	-0.24	-0.11	-0.15	-0.2
ci@13:113978892:113979976:-|13:113979975:113979976:-.1	chr13:113978792-113980076	ENSG00000139835	GRTP1	growth hormone regulated TBC protein 1	ci	NA	0.5	0.58	0.74	0.66	-0.24	-0.08	-0.16	-0.16
ci@13:115037956:115038039:+|13:115037956:115037957:+.1	chr13:115037856-115038139	ENSG00000130177	CDC16	cell division cycle 16	ci	NA	0.13	0.16	0.26	0.26	-0.13	-0.1	-0.13	-0.1
ci@13:115047602:115048312:+|13:115047602:115047603:+.1	chr13:115047502-115048412	ENSG00000169062	UPF3A	UPF3 regulator of nonsense transcripts homolog A (yeast)	ci	NA	0.78	0.9	0.98	0.93	-0.2	-0.03	-0.15	-0.08
ci@13:25905696:25911074:+|13:25905696:25905697:+.1	chr13:25905596-25911174	ENSG00000139496	NUPL1	nucleoporin like 1	ci	NA	0.71	0.85	0.87	0.83	-0.16	0.02	-0.12	-0.02
ci@13:41328228:41331009:-|13:41331008:41331009:-.1	chr13:41328128-41331109	ENSG00000102738	MRPS31	mitochondrial ribosomal protein S31	ci	NA	0.88	0.86	0.98	0.93	-0.1	-0.07	-0.05	-0.12
ci@13:41932609:41932946:+|13:41932609:41932610:+.1	chr13:41932509-41933046	ENSG00000172766	NAA16	N(alpha)-acetyltransferase 16, NatA auxiliary subunit	ci	NA	1	0.95	0.81	0.88	0.19	0.07	0.12	0.14
ci@13:41946966:41947773:+|13:41946966:41946967:+.1	chr13:41946866-41947873	ENSG00000172766	NAA16	N(alpha)-acetyltransferase 16, NatA auxiliary subunit	ci	NA	0.54	0.85	0.91	0.9	-0.37	-0.05	-0.36	-0.06
ci@13:41947916:41948878:+|13:41947916:41947917:+.1	chr13:41947816-41948978	ENSG00000172766	NAA16	N(alpha)-acetyltransferase 16, NatA auxiliary subunit	ci	NA	0.64	0.74	0.9	0.76	-0.26	-0.02	-0.12	-0.16
ci@13:44433033:44433808:-|13:44433807:44433808:-.1	chr13:44432933-44433908	ENSG00000151773	CCDC122	coiled-coil domain containing 122	ci	NA	0.78	0.58	0.98	0.9	-0.2	-0.32	-0.12	-0.4
ci@13:46104915:46108837:+|13:46104915:46104916:+.1	chr13:46104815-46108937	ENSG00000136152	COG3	component of oligomeric golgi complex 3	ci	NA	0.93	0.88	0.99	0.93	-0.06	-0.05	0	-0.11
ci@13:48612040:48615056:+|13:48612040:48612041:+.1	chr13:48611940-48615156	ENSG00000136159	NUDT15	nudix (nucleoside diphosphate linked moiety X)-type motif 15	ci	NA	0.85	0.88	0.75	0.85	0.1	0.03	0	0.13
ci@13:50092287:50095030:+|13:50092287:50092288:+.1	chr13:50092187-50095130	ENSG00000136147	PHF11	PHD finger protein 11	ci	NA	0.84	0.9	0.96	0.9	-0.12	0	-0.06	-0.06
ci@13:52728308:52730210:-|13:52730209:52730210:-.1	chr13:52728208-52730310	ENSG00000136098	NEK3	NIMA-related kinase 3	ci	NA	0.94	0.67	0.97	1	-0.03	-0.33	-0.06	-0.3
ci@13:73312181:73317675:+|13:73312181:73312182:+.1	chr13:73312081-73317775	ENSG00000136122	BORA	bora, aurora kinase A activator	ci	NA	0.86	1	0.98	1	-0.12	0	-0.14	0.02
ci@13:75884287:75886874:-|13:75886873:75886874:-.1	chr13:75884187-75886974	ENSG00000136111	TBC1D4	TBC1 domain family, member 4	ci	NA	0.81	0.89	0.94	0.97	-0.13	-0.08	-0.16	-0.05
ci@13:77570262:77574593:+|13:77570262:77570263:+.1	chr13:77570162-77574693	ENSG00000102805	CLN5	ceroid-lipofuscinosis, neuronal 5	ci	NA	0.84	0.81	0.97	0.9	-0.13	-0.09	-0.06	-0.16
ci@13:96326922:96328106:-|13:96328105:96328106:-.1	chr13:96326822-96328206	ENSG00000247400	DNAJC3-AS1	NA	ci	NA	0.03	0.13	0.4	0.28	-0.37	-0.15	-0.25	-0.27
ci@14:102695703:102695794:-|14:102695793:102695794:-.1	chr14:102695603-102695894	ENSG00000080823	MOK	MOK protein kinase	ci	NA	0.65	0.49	0.71	0.44	-0.06	0.05	0.21	-0.22
ci@14:102695703:102695794:-|14:102695793:102695794:-.1	chr14:102695603-102695894	ENSG00000080823	MOK	MOK protein kinase	ci	NA	0.65	0.49	0.71	0.44	-0.06	0.05	0.21	-0.22
ci@14:102810726:102814616:-|14:102814615:102814616:-.1	chr14:102810626-102814716	ENSG00000100865	CINP	cyclin-dependent kinase 2 interacting protein	ci	NA	0.47	0.39	0.16	0.42	0.31	-0.03	0.05	0.23
ci@14:103601688:103602146:+|14:103601688:103601689:+.1	chr14:103601588-103602246	ENSG00000185215	TNFAIP2	tumor necrosis factor, alpha-induced protein 2	ci	NA	0.43	0.28	0.47	0.38	-0.04	-0.1	0.05	-0.19
ci@14:103986929:103987600:-|14:103987599:103987600:-.1	chr14:103986829-103987700	ENSG00000166165	CKB	creatine kinase, brain	ci	NA	0.87	0.96	0.96	0.98	-0.09	-0.02	-0.11	0
ci@14:103987771:103988155:-|14:103988154:103988155:-.1	chr14:103987671-103988255	ENSG00000166165	CKB	creatine kinase, brain	ci	NA	0.75	0.9	0.96	0.92	-0.21	-0.02	-0.17	-0.06
ci@14:103988514:103988638:-|14:103988637:103988638:-.1	chr14:103988414-103988738	ENSG00000166165	CKB	creatine kinase, brain	ci	NA	0.69	0.85	0.97	0.98	-0.28	-0.13	-0.29	-0.12
ci@14:104151373:104151975:+|14:104151373:104151374:+.1	chr14:104151273-104152075	ENSG00000256500	KLC1	Kinesin light chain 1	ci	NA	0.49	0.59	0.41	0.38	0.08	0.21	0.11	0.18
ci@14:105718916:105722855:-|14:105722854:105722855:-.1	chr14:105718816-105722955	ENSG00000185024	BRF1	BRF1 homolog, subunit of RNA polymerase III transcription initiation factor IIIB (S. cerevisiae)	ci	NA	0.88	0.84	0.69	0.8	0.19	0.04	0.08	0.15
ci@14:105857586:105857968:+|14:105857586:105857587:+.1	chr14:105857486-105858068	ENSG00000179364	PACS2	phosphofurin acidic cluster sorting protein 2	ci	NA	0.76	0.75	0.89	0.81	-0.13	-0.06	-0.05	-0.14
ci@14:20850222:20850383:-|14:20850382:20850383:-.1	chr14:20850122-20850483	ENSG00000129566	TEP1	telomerase-associated protein 1	ci	NA	0.87	0.89	0.92	1	-0.05	-0.11	-0.13	-0.03
ci@14:20874559:20876032:-|14:20876031:20876032:-.1	chr14:20874459-20876132	ENSG00000129566	TEP1	telomerase-associated protein 1	ci	NA	0.64	0.81	0.75	0.96	-0.11	-0.15	-0.32	0.06
ci@14:20917172:20917330:-|14:20917329:20917330:-.1	chr14:20917072-20917430	ENSG00000092094	OSGEP	O-sialoglycoprotein endopeptidase	ci	NA	0.77	0.73	0.8	0.84	-0.03	-0.11	-0.07	-0.07
ci@14:20917425:20920133:-|14:20920132:20920133:-.1	chr14:20917325-20920233	ENSG00000092094	OSGEP	O-sialoglycoprotein endopeptidase	ci	NA	0.82	0.84	0.91	0.93	-0.09	-0.09	-0.11	-0.07
ci@14:20920607:20922728:-|14:20922727:20922728:-.1	chr14:20920507-20922828	ENSG00000092094	OSGEP	O-sialoglycoprotein endopeptidase	ci	NA	0.93	0.87	0.97	0.98	-0.04	-0.11	-0.05	-0.1
ci@14:20928457:20928814:-|14:20928813:20928814:-.1	chr14:20928357-20928914	ENSG00000165782	TMEM55B	transmembrane protein 55B	ci	NA	0.81	0.79	0.91	0.9	-0.1	-0.11	-0.09	-0.12
ci@14:21561449:21561745:-|14:21561744:21561745:-.1	chr14:21561349-21561845	ENSG00000165804	ZNF219	zinc finger protein 219	ci	NA	0.68	0.54	0.91	0.77	-0.23	-0.23	-0.09	-0.37
ci@14:21876714:21876863:-|14:21876862:21876863:-.1	chr14:21876614-21876963	ENSG00000100888	CHD8	chromodomain helicase DNA binding protein 8	ci	NA	0.94	0.89	1	0.94	-0.06	-0.05	0	-0.11
ci@14:21969271:21969870:-|14:21969869:21969870:-.1	chr14:21969171-21969970	ENSG00000165819	METTL3	methyltransferase like 3	ci	NA	0.83	0.79	0.87	0.9	-0.04	-0.11	-0.07	-0.08
ci@14:23459336:23465157:-|14:23465156:23465157:-.1	chr14:23459236-23465257	ENSG00000100802	C14orf93	chromosome 14 open reading frame 93	ci	NA	0.94	0.82	0.97	0.88	-0.03	-0.06	0.06	-0.15
ci@14:23524562:23524742:-|14:23524741:23524742:-.1	chr14:23524462-23524842	ENSG00000139880	CDH24	cadherin 24, type 2	ci	NA	0.87	0.89	1	0.98	-0.13	-0.09	-0.11	-0.11
ci@14:23777408:23778025:+|14:23777408:23777409:+.1	chr14:23777308-23778125	ENSG00000129473	BCL2L2	BCL2-like 2	ci	NA	0.7	0.75	0.84	0.72	-0.14	0.03	-0.02	-0.09
ci@14:23793498:23794456:+|14:23793498:23793499:+.1	chr14:23793398-23794556	ENSG00000100836	PABPN1	poly(A) binding protein, nuclear 1	ci	NA	0.68	0.7	0.82	0.81	-0.14	-0.11	-0.13	-0.12
ci@14:24029059:24029147:-|14:24029146:24029147:-.1	chr14:24028959-24029247	ENSG00000213983	AP1G2	adaptor-related protein complex 1, gamma 2 subunit	ci	NA	0.75	0.81	0.91	0.85	-0.16	-0.04	-0.1	-0.1
ci@14:24029245:24029464:-|14:24029463:24029464:-.1	chr14:24029145-24029564	ENSG00000213983	AP1G2	adaptor-related protein complex 1, gamma 2 subunit	ci	NA	0.59	0.64	0.78	0.7	-0.19	-0.06	-0.11	-0.14
ci@14:24029627:24030505:-|14:24030504:24030505:-.1	chr14:24029527-24030605	ENSG00000213983	AP1G2	adaptor-related protein complex 1, gamma 2 subunit	ci	NA	0.67	0.71	0.84	0.84	-0.17	-0.13	-0.17	-0.13
ci@14:24030640:24030721:-|14:24030720:24030721:-.1	chr14:24030540-24030821	ENSG00000213983	AP1G2	adaptor-related protein complex 1, gamma 2 subunit	ci	NA	0.67	0.62	0.8	0.76	-0.13	-0.14	-0.09	-0.18
ci@14:24030844:24031171:-|14:24031170:24031171:-.1	chr14:24030744-24031271	ENSG00000213983	AP1G2	adaptor-related protein complex 1, gamma 2 subunit	ci	NA	0.73	0.75	0.88	0.88	-0.15	-0.13	-0.15	-0.13
ci@14:24031082:24033936:+|14:24031082:24031083:+.1	chr14:24030982-24034036	ENSG00000258727	RP11-66N24.3	NA	ci	NA	0.42	0.33	0.43	0.49	-0.01	-0.16	-0.07	-0.1
ci@14:24032711:24032793:-|14:24032792:24032793:-.1	chr14:24032611-24032893	ENSG00000213983	AP1G2	adaptor-related protein complex 1, gamma 2 subunit	ci	NA	0.65	0.66	0.76	0.82	-0.11	-0.16	-0.17	-0.1
ci@14:24033065:24033255:-|14:24033254:24033255:-.1	chr14:24032965-24033355	ENSG00000213983	AP1G2	adaptor-related protein complex 1, gamma 2 subunit	ci	NA	0.51	0.52	0.6	0.65	-0.09	-0.13	-0.14	-0.08
ci@14:24033597:24033771:-|14:24033770:24033771:-.1	chr14:24033497-24033871	ENSG00000213983	AP1G2	adaptor-related protein complex 1, gamma 2 subunit	ci	NA	0.85	0.82	0.88	0.92	-0.03	-0.1	-0.07	-0.06
ci@14:24034408:24034815:-|14:24034814:24034815:-.1	chr14:24034308-24034915	ENSG00000213983	AP1G2	adaptor-related protein complex 1, gamma 2 subunit	ci	NA	0.6	0.68	0.72	0.75	-0.12	-0.07	-0.15	-0.04
ci@14:24035369:24035487:-|14:24035486:24035487:-.1	chr14:24035269-24035587	ENSG00000213983	AP1G2	adaptor-related protein complex 1, gamma 2 subunit	ci	NA	0.71	0.7	0.77	0.8	-0.06	-0.1	-0.09	-0.07
ci@14:24423125:24424244:+|14:24423125:24423126:+.1	chr14:24423025-24424344	ENSG00000157326	DHRS4	dehydrogenase/reductase (SDR family) member 4	ci	NA	0.69	0.7	0.8	0.78	-0.11	-0.08	-0.09	-0.1
ci@14:24633343:24633823:+|14:24633343:24633344:+.1	chr14:24633243-24633923	ENSG00000259529	RNF31	E3 ubiquitin-protein ligase RNF31	ci	NA	0.81	0.74	0.86	0.9	-0.05	-0.16	-0.09	-0.12
ci@14:24633343:24635056:+|14:24633343:24633344:+.1	chr14:24633243-24635156	ENSG00000213928	IRF9	interferon regulatory factor 9	ci	NA	0.02	0	0.12	0.05	-0.1	-0.05	-0.03	-0.12
ci@14:24735723:24735982:-|14:24735981:24735982:-.1	chr14:24735623-24736082	ENSG00000100949	RABGGTA	Rab geranylgeranyltransferase, alpha subunit	ci	NA	0.85	0.77	0.92	0.91	-0.07	-0.14	-0.06	-0.15
ci@14:24808530:24808663:-|14:24808662:24808663:-.1	chr14:24808430-24808763	ENSG00000129465	RIPK3	receptor-interacting serine-threonine kinase 3	ci	NA	0.84	0.58	0.79	0.87	0.05	-0.29	-0.03	-0.21
ci@14:24911001:24911384:-|14:24911383:24911384:-.1	chr14:24910901-24911484	ENSG00000100445	SDR39U1	short chain dehydrogenase/reductase family 39U, member 1	ci	NA	0.76	0.71	0.84	0.81	-0.08	-0.1	-0.05	-0.13
ci@14:24911466:24911552:-|14:24911551:24911552:-.1	chr14:24911366-24911652	ENSG00000100445	SDR39U1	short chain dehydrogenase/reductase family 39U, member 1	ci	NA	0.82	0.87	0.93	0.96	-0.11	-0.09	-0.14	-0.06
ci@14:35331528:35343698:-|14:35343697:35343698:-.1	chr14:35331428-35343798	ENSG00000198604	BAZ1A	bromodomain adjacent to zinc finger domain, 1A	ci	NA	0.94	0.88	0.81	0.86	0.13	0.02	0.08	0.07
ci@14:36943086:36946176:-|14:36946175:36946176:-.1	chr14:36942986-36946276	ENSG00000257520	RP11-896J10.3	NA	ci	NA	0.82	0.76	0.83	0.71	-0.01	0.05	0.11	-0.07
ci@14:36947083:36960406:-|14:36960405:36960406:-.1	chr14:36946983-36960506	ENSG00000257520	RP11-896J10.3	NA	ci	NA	0.82	0.81	0.97	0.91	-0.15	-0.1	-0.09	-0.16
ci@14:36960496:36988673:-|14:36988672:36988673:-.1	chr14:36960396-36988773	ENSG00000257520	RP11-896J10.3	NA	ci	NA	0.02	0.02	0.2	0.11	-0.18	-0.09	-0.09	-0.18
ci@14:37344209:37641486:-|14:37641485:37641486:-.1	chr14:37344109-37641586	ENSG00000183032	SLC25A21	solute carrier family 25 (mitochondrial oxoadipate carrier), member 21	ci	NA	0.12	0.19	0.03	0.07	0.09	0.12	0.05	0.16
ci@14:45673415:45673602:-|14:45673601:45673602:-.1	chr14:45673315-45673702	ENSG00000129534	MIS18BP1	MIS18 binding protein 1	ci	NA	0.91	0.86	0.97	0.93	-0.06	-0.07	-0.02	-0.11
ci@14:45675373:45679583:-|14:45679582:45679583:-.1	chr14:45675273-45679683	ENSG00000129534	MIS18BP1	MIS18 binding protein 1	ci	NA	0.81	0.8	0.98	0.89	-0.17	-0.09	-0.08	-0.18
ci@14:50110388:50114011:-|14:50114010:50114011:-.1	chr14:50110288-50114111	ENSG00000100479	POLE2	polymerase (DNA directed), epsilon 2, accessory subunit	ci	NA	0.56	0.56	0.9	0.88	-0.34	-0.32	-0.32	-0.34
ci@14:50121556:50121723:-|14:50121722:50121723:-.1	chr14:50121456-50121823	ENSG00000100479	POLE2	polymerase (DNA directed), epsilon 2, accessory subunit	ci	NA	0.86	1	0.99	1	-0.13	0	-0.14	0.01
ci@14:50122561:50130033:-|14:50130032:50130033:-.1	chr14:50122461-50130133	ENSG00000100479	POLE2	polymerase (DNA directed), epsilon 2, accessory subunit	ci	NA	0.74	0.84	0.93	0.99	-0.19	-0.15	-0.25	-0.09
ci@14:50712838:50713759:-|14:50713758:50713759:-.1	chr14:50712738-50713859	ENSG00000087299	L2HGDH	L-2-hydroxyglutarate dehydrogenase	ci	NA	0.45	0.61	0.46	0.35	-0.01	0.26	0.1	0.15
ci@14:50796899:50798980:-|14:50798979:50798980:-.1	chr14:50796799-50799080	ENSG00000100490	CDKL1	cyclin-dependent kinase-like 1 (CDC2-related kinase)	ci	NA	0.52	0.19	0.44	0.65	0.08	-0.46	-0.13	-0.25
ci@14:50904729:50906731:-|14:50906730:50906731:-.1	chr14:50904629-50906831	ENSG00000012983	MAP4K5	mitogen-activated protein kinase kinase kinase kinase 5	ci	NA	0.91	0.83	0.99	0.99	-0.08	-0.16	-0.08	-0.16
ci@14:51190390:51192671:-|14:51192670:51192671:-.1	chr14:51190290-51192771	ENSG00000100503	NIN	ninein (GSK3B interacting protein)	ci	NA	0.57	0.63	0.82	0.85	-0.25	-0.22	-0.28	-0.19
ci@14:59939808:59942587:-|14:59942586:59942587:-.1	chr14:59939708-59942687	ENSG00000126790	L3HYPDH	L-3-hydroxyproline dehydratase (trans-)	ci	NA	0.4	0.44	0.53	0.57	-0.13	-0.13	-0.17	-0.09
ci@14:60582179:60582437:+|14:60582179:60582180:+.1	chr14:60582079-60582537	ENSG00000126773	PCNXL4	pecanex-like 4 (Drosophila)	ci	NA	0.9	0.69	0.76	0.87	0.14	-0.18	0.03	-0.07
ci@14:60582179:60582437:+|14:60582179:60582180:+.1	chr14:60582079-60582537	ENSG00000126773	PCNXL4	pecanex-like 4 (Drosophila)	ci	NA	0.9	0.69	0.76	0.87	0.14	-0.18	0.03	-0.07
ci@14:68114900:68117432:+|14:68114900:68114901:+.1	chr14:68114800-68117532	ENSG00000081181	ARG2	arginase, type II	ci	NA	0.41	0.53	0.6	0.27	-0.19	0.26	0.14	-0.07
ci@14:68114900:68117432:+|14:68114900:68114901:+.1	chr14:68114800-68117532	ENSG00000081181	ARG2	arginase, type II	ci	NA	0.41	0.53	0.6	0.27	-0.19	0.26	0.14	-0.07
ci@14:68260956:68264389:-|14:68264388:68264389:-.1	chr14:68260856-68264489	ENSG00000072121	ZFYVE26	zinc finger, FYVE domain containing 26	ci	NA	0.84	0.91	0.97	1	-0.13	-0.09	-0.16	-0.06
ci@14:73577863:73578236:+|14:73577863:73577864:+.1	chr14:73577763-73578336	ENSG00000119707	RBM25	RNA binding motif protein 25	ci	NA	0.93	0.92	0.79	0.86	0.14	0.06	0.07	0.13
ci@14:74350830:74358730:+|14:74350830:74350831:+.1	chr14:74350730-74358830	ENSG00000258653	RP5-1021I20.4	Uncharacterized protein	ci	NA	0.28	0.19	0.02	0.3	0.26	-0.11	-0.02	0.17
ci@14:74424980:74425674:+|14:74424980:74424981:+.1	chr14:74424880-74425774	ENSG00000119723	COQ6	coenzyme Q6 homolog, monooxygenase (S. cerevisiae)	ci	NA	0.75	0.7	0.85	0.85	-0.1	-0.15	-0.1	-0.15
ci@14:75516421:75518083:-|14:75518082:75518083:-.1	chr14:75516321-75518183	ENSG00000119684	MLH3	mutL homolog 3 (E. coli)	ci	NA	0.41	0.47	0.8	0.59	-0.39	-0.12	-0.18	-0.33
ci@14:77270255:77272759:-|14:77272758:77272759:-.1	chr14:77270155-77272859	ENSG00000013523	ANGEL1	angel homolog 1 (Drosophila)	ci	NA	0.76	0.79	0.94	0.87	-0.18	-0.08	-0.11	-0.15
ci@14:77746423:77746735:-|14:77746734:77746735:-.1	chr14:77746323-77746835	ENSG00000009830	POMT2	protein-O-mannosyltransferase 2	ci	NA	0.89	0.81	0.96	0.94	-0.07	-0.13	-0.05	-0.15
ci@14:77750216:77751293:-|14:77751292:77751293:-.1	chr14:77750116-77751393	ENSG00000009830	POMT2	protein-O-mannosyltransferase 2	ci	NA	0.9	0.88	1	0.92	-0.1	-0.04	-0.02	-0.12
ci@14:90456109:90458261:+|14:90456109:90456110:+.1	chr14:90456009-90458361	ENSG00000042088	TDP1	tyrosyl-DNA phosphodiesterase 1	ci	NA	1	0.89	1	0.96	0	-0.07	0.04	-0.11
ci@14:91681900:91691028:+|14:91681900:91681901:+.1	chr14:91681800-91691128	ENSG00000133943	C14orf159	chromosome 14 open reading frame 159	ci	NA	0.81	0.78	0.89	0.9	-0.08	-0.12	-0.09	-0.11
ci@14:94568321:94568823:+|14:94568321:94568322:+.1	chr14:94568221-94568923	ENSG00000165948	IFI27L1	interferon, alpha-inducible protein 27-like 1	ci	NA	0.59	0.61	0.73	0.67	-0.14	-0.06	-0.08	-0.12
ci@14:95999398:96000030:-|14:96000029:96000030:-.1	chr14:95999298-96000130	ENSG00000247092	SNHG10	NA	ci	NA	0.57	0.53	0.56	0.74	0.01	-0.21	-0.17	-0.03
ci@15:22864369:22866716:+|15:22864369:22864370:+.1	chr15:22864269-22866816	ENSG00000153575	TUBGCP5	tubulin, gamma complex associated protein 5	ci	NA	0.81	0.87	0.96	1	-0.15	-0.13	-0.19	-0.09
ci@15:22867016:22867458:+|15:22867016:22867017:+.1	chr15:22866916-22867558	ENSG00000153575	TUBGCP5	tubulin, gamma complex associated protein 5	ci	NA	0.95	0.81	0.98	0.92	-0.03	-0.11	0.03	-0.17
ci@15:23812131:23820493:+|15:23812131:23812132:+.1	chr15:23812031-23820593	ENSG00000179455	MKRN3	makorin ring finger protein 3	ci	NA	0.19	0.09	0.45	0.44	-0.26	-0.35	-0.25	-0.36
ci@15:26108349:26110162:-|15:26110161:26110162:-.1	chr15:26108249-26110262	ENSG00000206190	ATP10A	ATPase, class V, type 10A	ci	NA	0.31	0.25	0.53	0.25	-0.22	0	0.06	-0.28
ci@15:32928116:32928458:+|15:32928116:32928117:+.1	chr15:32928016-32928558	ENSG00000198826	ARHGAP11A	Rho GTPase activating protein 11A	ci	NA	0.92	0.95	0.83	0.88	0.09	0.07	0.04	0.12
ci@15:32983964:32988715:+|15:32983964:32983965:+.1	chr15:32983864-32988815	ENSG00000166922	SCG5	secretogranin V (7B2 protein)	ci	NA	0.87	0.91	0.87	0.73	0	0.18	0.14	0.04
ci@15:34439631:34440833:-|15:34440832:34440833:-.1	chr15:34439531-34440933	ENSG00000134152	KATNBL1	katanin p80 subunit B-like 1	ci	NA	0.81	0.85	0.94	0.86	-0.13	-0.01	-0.05	-0.09
ci@15:34655037:34655623:-|15:34655622:34655623:-.1	chr15:34654937-34655723	ENSG00000176454	LPCAT4	lysophosphatidylcholine acyltransferase 4	ci	NA	0.87	0.9	0.98	0.97	-0.11	-0.07	-0.1	-0.08
ci@15:34655657:34655862:-|15:34655861:34655862:-.1	chr15:34655557-34655962	ENSG00000176454	LPCAT4	lysophosphatidylcholine acyltransferase 4	ci	NA	0.81	0.82	0.96	0.91	-0.15	-0.09	-0.1	-0.14
ci@15:34655920:34656214:-|15:34656213:34656214:-.1	chr15:34655820-34656314	ENSG00000176454	LPCAT4	lysophosphatidylcholine acyltransferase 4	ci	NA	0.83	0.84	0.94	0.92	-0.11	-0.08	-0.09	-0.1
ci@15:40400587:40400974:-|15:40400973:40400974:-.1	chr15:40400487-40401074	ENSG00000104081	BMF	Bcl2 modifying factor	ci	NA	0.83	0.94	0.85	0.73	-0.02	0.21	0.1	0.09
ci@15:40568306:40569317:+|15:40568306:40568307:+.1	chr15:40568206-40569417	ENSG00000137843	PAK6	p21 protein (Cdc42/Rac)-activated kinase 6	ci	NA	0.08	0.01	0.12	0.07	-0.04	-0.06	0.01	-0.11
ci@15:41136384:41136688:+|15:41136384:41136385:+.1	chr15:41136284-41136788	ENSG00000166145	SPINT1	serine peptidase inhibitor, Kunitz type 1	ci	NA	0.39	0.36	0.31	0.28	0.08	0.08	0.11	0.05
ci@15:41605552:41611856:-|15:41611855:41611856:-.1	chr15:41605452-41611956	ENSG00000104147	OIP5	Opa interacting protein 5	ci	NA	0.9	0.83	0.96	0.96	-0.06	-0.13	-0.06	-0.13
ci@15:41814448:41814963:-|15:41814962:41814963:-.1	chr15:41814348-41815063	ENSG00000103932	RPAP1	RNA polymerase II associated protein 1	ci	NA	0.93	0.91	0.81	0.91	0.12	0	0.02	0.1
ci@15:42113266:42113782:+|15:42113266:42113267:+.1	chr15:42113166-42113882	ENSG00000137802	MAPKBP1	mitogen-activated protein kinase binding protein 1	ci	NA	0.85	0.94	0.98	0.92	-0.13	0.02	-0.07	-0.04
ci@15:42127091:42127168:+|15:42127091:42127092:+.1	chr15:42126991-42127268	ENSG00000168970	JMJD7-PLA2G4B	JMJD7-PLA2G4B readthrough	ci	NA	0.67	0.79	0.84	0.9	-0.17	-0.11	-0.23	-0.05
ci@15:42128749:42128979:+|15:42128749:42128750:+.1	chr15:42128649-42129079	ENSG00000243789	JMJD7	jumonji domain containing 7	ci	NA	0.73	0.81	0.91	0.77	-0.18	0.04	-0.04	-0.1
ci@15:42568608:42570680:+|15:42568608:42568609:+.1	chr15:42568508-42570780	ENSG00000214013	GANC	glucosidase, alpha; neutral C	ci	NA	0.89	0.95	1	0.94	-0.11	0.01	-0.05	-0.05
ci@15:43016814:43017342:-|15:43017341:43017342:-.1	chr15:43016714-43017442	ENSG00000140326	CDAN1	codanin 1	ci	NA	0.79	0.84	0.96	0.93	-0.17	-0.09	-0.14	-0.12
ci@15:43694048:43695881:+|15:43694048:43694049:+.1	chr15:43693948-43695981	ENSG00000137822	TUBGCP4	tubulin, gamma complex associated protein 4	ci	NA	0.89	0.86	0.98	0.87	-0.09	-0.01	0.02	-0.12
ci@15:44067579:44067723:-|15:44067722:44067723:-.1	chr15:44067479-44067823	ENSG00000128886	ELL3	elongation factor RNA polymerase II-like 3	ci	NA	0.66	0.78	0.91	0.92	-0.25	-0.14	-0.26	-0.13
ci@15:44068349:44068707:-|15:44068706:44068707:-.1	chr15:44068249-44068807	ENSG00000128886	ELL3	elongation factor RNA polymerase II-like 3	ci	NA	0.85	0.96	1	0.96	-0.15	0	-0.11	-0.04
ci@15:44828556:44828999:-|15:44828998:44828999:-.1	chr15:44828456-44829099	ENSG00000179523	RP11-151N17.2	NA	ci	NA	0.24	0.3	0.59	0.56	-0.35	-0.26	-0.32	-0.29
ci@15:45742488:45768277:+|15:45742488:45742489:+.1	chr15:45742388-45768377	ENSG00000259354	RP11-519G16.3	NA	ci	NA	0.61	0.83	0.92	0.6	-0.31	0.23	0.01	-0.09
ci@15:49031485:49033798:-|15:49033797:49033798:-.1	chr15:49031385-49033898	ENSG00000103995	CEP152	centrosomal protein 152kDa	ci	NA	0.41	0.27	0.64	0.28	-0.23	-0.01	0.13	-0.37
ci@15:50647742:50648297:+|15:50647742:50647743:+.1	chr15:50647642-50648397	ENSG00000244879	GABPB1-AS1	NA	ci	NA	0.13	0	0.18	0.18	-0.05	-0.18	-0.05	-0.18
ci@15:50891493:50897063:-|15:50897062:50897063:-.1	chr15:50891393-50897163	ENSG00000092439	TRPM7	transient receptor potential cation channel, subfamily M, member 7	ci	NA	0.9	0.81	0.79	0.74	0.11	0.07	0.16	0.02
ci@15:52540980:52543587:-|15:52543586:52543587:-.1	chr15:52540880-52543687	ENSG00000128833	MYO5C	myosin VC	ci	NA	0.79	0.7	0.83	0.71	-0.04	-0.01	0.08	-0.13
ci@15:59970286:59971791:-|15:59971790:59971791:-.1	chr15:59970186-59971891	ENSG00000140299	BNIP2	BCL2/adenovirus E1B 19kDa interacting protein 2	ci	NA	0.39	0.51	0.78	0.69	-0.39	-0.18	-0.3	-0.27
ci@15:63421849:63433479:+|15:63421849:63421850:+.1	chr15:63421749-63433579	ENSG00000103642	LACTB	lactamase, beta	ci	NA	0.76	0.86	0.92	0.88	-0.16	-0.02	-0.12	-0.06
ci@15:63886985:63892788:-|15:63892787:63892788:-.1	chr15:63886885-63892888	ENSG00000259248	RP11-265M18.2	NA	ci	NA	0.59	0.56	0.58	0.96	0.01	-0.4	-0.37	-0.02
ci@15:64200799:64204107:-|15:64204106:64204107:-.1	chr15:64200699-64204207	ENSG00000035664	DAPK2	death-associated protein kinase 2	ci	NA	0.79	0.83	0.93	0.81	-0.14	0.02	-0.02	-0.1
ci@15:65995346:65998429:-|15:65998428:65998429:-.1	chr15:65995246-65998529	ENSG00000174485	DENND4A	DENN/MADD domain containing 4A	ci	NA	1	1	0.94	0.85	0.06	0.15	0.15	0.06
ci@15:67813932:67818756:+|15:67813932:67813933:+.1	chr15:67813832-67818856	ENSG00000189227	C15orf61	chromosome 15 open reading frame 61	ci	NA	0.88	0.83	0.94	0.89	-0.06	-0.06	-0.01	-0.11
ci@15:71175247:71184183:-|15:71184182:71184183:-.1	chr15:71175147-71184283	ENSG00000129028	THAP10	THAP domain containing 10	ci	NA	0.71	0.83	1	0.89	-0.29	-0.06	-0.18	-0.17
ci@15:72559163:72559816:-|15:72559815:72559816:-.1	chr15:72559063-72559916	ENSG00000137817	PARP6	poly (ADP-ribose) polymerase family, member 6	ci	NA	0.6	0.59	0.8	0.72	-0.2	-0.13	-0.12	-0.21
ci@15:73048788:73052748:-|15:73052747:73052748:-.1	chr15:73048688-73052848	ENSG00000159322	ADPGK	ADP-dependent glucokinase	ci	NA	0.76	0.76	0.93	0.93	-0.17	-0.17	-0.17	-0.17
ci@15:74335480:74336562:+|15:74335480:74335481:+.1	chr15:74335380-74336662	ENSG00000140464	PML	promyelocytic leukemia	ci	NA	0.66	0.57	0.38	0.44	0.28	0.13	0.22	0.19
ci@15:74472584:74473123:-|15:74473122:74473123:-.1	chr15:74472484-74473223	ENSG00000137868	STRA6	stimulated by retinoic acid 6	ci	NA	0.74	0.86	0.93	0.91	-0.19	-0.05	-0.17	-0.07
ci@15:74495439:74501729:+|15:74495439:74495440:+.1	chr15:74495339-74501829	ENSG00000259264	RP11-60L3.1	NA	ci	NA	0.67	0.68	0.86	0.82	-0.19	-0.14	-0.15	-0.18
ci@15:74883775:74883901:+|15:74883775:74883776:+.1	chr15:74883675-74884001	ENSG00000179361	ARID3B	AT rich interactive domain 3B (BRIGHT-like)	ci	NA	0.77	0.81	0.96	0.87	-0.19	-0.06	-0.1	-0.15
ci@15:75652552:75652906:-|15:75652905:75652906:-.1	chr15:75652452-75653006	ENSG00000140400	MAN2C1	mannosidase, alpha, class 2C, member 1	ci	NA	0.72	0.71	0.83	0.8	-0.11	-0.09	-0.08	-0.12
ci@15:75653029:75653387:-|15:75653386:75653387:-.1	chr15:75652929-75653487	ENSG00000140400	MAN2C1	mannosidase, alpha, class 2C, member 1	ci	NA	0.75	0.73	0.84	0.9	-0.09	-0.17	-0.15	-0.11
ci@15:79273041:79277349:-|15:79277348:79277349:-.1	chr15:79272941-79277449	ENSG00000058335	RASGRF1	Ras protein-specific guanine nucleotide-releasing factor 1	ci	NA	0.55	0.5	0.75	0.66	-0.2	-0.16	-0.11	-0.25
ci@15:82767756:82768927:-|15:82768926:82768927:-.1	chr15:82767656-82769027	ENSG00000255769	RP11-152F13.3	NA	ci	NA	0.7	0.9	0.19	0.26	0.51	0.64	0.44	0.71
ci@15:83144340:83145511:-|15:83145510:83145511:-.1	chr15:83144240-83145611	ENSG00000259472	RP13-996F3.3	NA	ci	NA	0.53	0.55	0.99	0.98	-0.46	-0.43	-0.45	-0.44
ci@15:85191185:85191768:-|15:85191767:85191768:-.1	chr15:85191085-85191868	ENSG00000177082	WDR73	WD repeat domain 73	ci	NA	0.78	0.84	0.86	0.89	-0.08	-0.05	-0.11	-0.02
ci@15:89172657:89173289:+|15:89172657:89172658:+.1	chr15:89172557-89173389	ENSG00000181026	AEN	apoptosis enhancing nuclease	ci	NA	0.91	0.86	1	0.92	-0.09	-0.06	-0.01	-0.14
ci@15:89825066:89826367:+|15:89825066:89825067:+.1	chr15:89824966-89826467	ENSG00000140525	FANCI	Fanconi anemia, complementation group I	ci	NA	0.84	0.94	0.97	0.94	-0.13	0	-0.1	-0.03
ci@15:90172804:90173518:-|15:90173517:90173518:-.1	chr15:90172704-90173618	ENSG00000166813	KIF7	kinesin family member 7	ci	NA	0.76	0.63	0.8	0.44	-0.04	0.19	0.32	-0.17
ci@15:91504284:91504848:+|15:91504284:91504285:+.1	chr15:91504184-91504948	ENSG00000166965	RCCD1	RCC1 domain containing 1	ci	NA	0.58	0.48	0.6	0.73	-0.02	-0.25	-0.15	-0.12
ci@15:93492306:93496587:+|15:93492306:93492307:+.1	chr15:93492206-93496687	ENSG00000173575	CHD2	chromodomain helicase DNA binding protein 2	ci	NA	0.87	0.85	0.72	0.81	0.15	0.04	0.06	0.13
ci@16:110537:111118:-|16:111117:111118:-.1	chr16:110437-111218	ENSG00000007384	RHBDF1	rhomboid 5 homolog 1 (Drosophila)	ci	NA	0.66	0.79	0.78	0.9	-0.12	-0.11	-0.24	0.01
ci@16:11220003:11260245:+|16:11220003:11220004:+.1	chr16:11219903-11260345	ENSG00000038532	CLEC16A	C-type lectin domain family 16, member A	ci	NA	0.9	0.82	0.78	0.95	0.12	-0.13	-0.05	0.04
ci@16:15044112:15045472:+|16:15044112:15044113:+.1	chr16:15044012-15045572	ENSG00000183426	NPIP	nuclear pore complex interacting protein	ci	NA	0.43	0.39	0.58	0.09	-0.15	0.3	0.34	-0.19
ci@16:1573957:1574553:-|16:1574552:1574553:-.1	chr16:1573857-1574653	ENSG00000187535	IFT140	intraflagellar transport 140 homolog (Chlamydomonas)	ci	NA	0.87	0.87	0.9	1	-0.03	-0.13	-0.13	-0.03
ci@16:1576797:1607936:-|16:1607935:1607936:-.1	chr16:1576697-1608036	ENSG00000187535	IFT140	intraflagellar transport 140 homolog (Chlamydomonas)	ci	NA	0.91	0.74	0.94	0.92	-0.03	-0.18	-0.01	-0.2
ci@16:16415264:16416163:+|16:16415264:16415265:+.1	chr16:16415164-16416263	ENSG00000244257	PKD1P1	NA	ci	NA	0.85	0.97	0.97	1	-0.12	-0.03	-0.15	0
ci@16:16434291:16437902:+|16:16434291:16434292:+.1	chr16:16434191-16438002	ENSG00000183889	PKD1P1	NPIP-like protein 1	ci	NA	0.98	0.99	0.88	0.73	0.1	0.26	0.25	0.11
ci@16:1823842:1824261:+|16:1823842:1823843:+.1	chr16:1823742-1824361	ENSG00000197774	EME2	essential meiotic endonuclease 1 homolog 2 (S. pombe)	ci	NA	1	0.95	0.71	0.96	0.29	-0.01	0.04	0.24
ci@16:18440218:18441117:-|16:18441116:18441117:-.1	chr16:18440118-18441217	ENSG00000205746	RP11-1212A22.1	NA	ci	NA	0.86	0.52	0.61	0.76	0.25	-0.24	0.1	-0.09
ci@16:19514939:19516203:-|16:19516202:19516203:-.1	chr16:19514839-19516303	ENSG00000006007	GDE1	glycerophosphodiester phosphodiesterase 1	ci	NA	0.65	0.63	0.8	0.81	-0.15	-0.18	-0.16	-0.17
ci@16:20747680:20748182:-|16:20748181:20748182:-.1	chr16:20747580-20748282	ENSG00000066654	THUMPD1	THUMP domain containing 1	ci	NA	0.29	0.34	0.42	0.45	-0.13	-0.11	-0.16	-0.08
ci@16:20793109:20796306:+|16:20793109:20793110:+.1	chr16:20793009-20796406	ENSG00000005187	ACSM3	acyl-CoA synthetase medium-chain family member 3	ci	NA	0.99	0.88	1	1	-0.01	-0.12	-0.01	-0.12
ci@16:20796429:20797400:+|16:20796429:20796430:+.1	chr16:20796329-20797500	ENSG00000005187	ACSM3	acyl-CoA synthetase medium-chain family member 3	ci	NA	0.92	0.83	0.98	0.93	-0.06	-0.1	-0.01	-0.15
ci@16:20797480:20801909:+|16:20797480:20797481:+.1	chr16:20797380-20802009	ENSG00000005187	ACSM3	acyl-CoA synthetase medium-chain family member 3	ci	NA	0.65	0.71	0.87	0.82	-0.22	-0.11	-0.17	-0.16
ci@16:20807811:20808208:+|16:20807811:20807812:+.1	chr16:20807711-20808308	ENSG00000005187	ACSM3	acyl-CoA synthetase medium-chain family member 3	ci	NA	0.39	0.27	0.49	0.4	-0.1	-0.13	-0.01	-0.22
ci@16:2168463:2168677:-|16:2168676:2168677:-.1	chr16:2168363-2168777	ENSG00000008710	PKD1	polycystic kidney disease 1 (autosomal dominant)	ci	NA	0.66	0.24	0.57	0.99	0.09	-0.75	-0.33	-0.33
ci@16:2273771:2278373:+|16:2273771:2273772:+.1	chr16:2273671-2278473	ENSG00000167967	E4F1	E4F transcription factor 1	ci	NA	0.84	0.87	0.92	0.98	-0.08	-0.11	-0.14	-0.05
ci@16:2283648:2283883:+|16:2283648:2283649:+.1	chr16:2283548-2283983	ENSG00000167967	E4F1	E4F transcription factor 1	ci	NA	0.94	1	0.89	0.95	0.05	0.05	-0.01	0.11
ci@16:24552113:24557484:+|16:24552113:24552114:+.1	chr16:24552013-24557584	ENSG00000122257	RBBP6	retinoblastoma binding protein 6	ci	NA	0.87	0.83	0.99	0.91	-0.12	-0.08	-0.04	-0.16
ci@16:2503538:2505396:+|16:2503538:2503539:+.1	chr16:2503438-2505496	ENSG00000162063	CCNF	cyclin F	ci	NA	0.78	0.98	0.92	0.94	-0.14	0.04	-0.16	0.06
ci@16:2505565:2506546:+|16:2505565:2505566:+.1	chr16:2505465-2506646	ENSG00000162063	CCNF	cyclin F	ci	NA	0.86	0.95	0.97	1	-0.11	-0.05	-0.14	-0.02
ci@16:28966003:28967299:+|16:28966003:28966004:+.1	chr16:28965903-28967399	ENSG00000176953	NFATC2IP	nuclear factor of activated T-cells, cytoplasmic, calcineurin-dependent 2 interacting protein	ci	NA	0.55	0.62	0.69	0.7	-0.14	-0.08	-0.15	-0.07
ci@16:29474982:29475481:+|16:29474982:29474983:+.1	chr16:29474882-29475581	ENSG00000260280	SLX1B-SULT1A4	NA	ci	NA	1	0.26	0.52	0.98	0.48	-0.72	0.02	-0.26
ci@16:29828328:29828531:+|16:29828328:29828329:+.1	chr16:29828228-29828631	ENSG00000185928	PAGR1	PAXIP1 associated glutamate-rich protein 1	ci	NA	0.7	0.82	0.9	0.84	-0.2	-0.02	-0.14	-0.08
ci@16:29828613:29830876:+|16:29828613:29828614:+.1	chr16:29828513-29830976	ENSG00000185928	PAGR1	PAXIP1 associated glutamate-rich protein 1	ci	NA	0.63	0.78	0.87	0.81	-0.24	-0.03	-0.18	-0.09
ci@16:29830922:29832199:-|16:29832198:29832199:-.1	chr16:29830822-29832299	ENSG00000261690	AC009133.12	NA	ci	NA	0.53	0.46	0.36	0.41	0.17	0.05	0.12	0.1
ci@16:29918429:29922299:-|16:29922298:29922299:-.1	chr16:29918329-29922399	ENSG00000174943	KCTD13	potassium channel tetramerisation domain containing 13	ci	NA	0.81	0.88	0.95	0.88	-0.14	0	-0.07	-0.07
ci@16:29923370:29934511:-|16:29934510:29934511:-.1	chr16:29923270-29934611	ENSG00000174943	KCTD13	potassium channel tetramerisation domain containing 13	ci	NA	0.72	0.78	0.9	0.7	-0.18	0.08	0.02	-0.12
ci@16:30014334:30014757:+|16:30014334:30014335:+.1	chr16:30014234-30014857	ENSG00000169592	INO80E	INO80 complex subunit E	ci	NA	0.31	0.33	0.63	0.28	-0.32	0.05	0.03	-0.3
ci@16:30014847:30014971:+|16:30014847:30014848:+.1	chr16:30014747-30015071	ENSG00000169592	INO80E	INO80 complex subunit E	ci	NA	0.11	0.15	0.33	0.13	-0.22	0.02	-0.02	-0.18
ci@16:30124385:30124661:-|16:30124660:30124661:-.1	chr16:30124285-30124761	ENSG00000102886	GDPD3	glycerophosphodiester phosphodiesterase domain containing 3	ci	NA	0.28	0.18	0.05	0.28	0.23	-0.1	0	0.13
ci@16:30206112:30206207:+|16:30206112:30206113:+.1	chr16:30206012-30206307	ENSG00000213599	SLX1A-SULT1A3	NA	ci	NA	0.67	0.41	0.39	0.33	0.28	0.08	0.34	0.02
ci@16:30216007:30216148:-|16:30216147:30216148:-.1	chr16:30215907-30216248	ENSG00000258130	RP11-347C12.3	Uncharacterized protein	ci	NA	0.68	0.81	0.88	0.97	-0.2	-0.16	-0.29	-0.07
ci@16:30591168:30593832:-|16:30593831:30593832:-.1	chr16:30591068-30593932	ENSG00000197162	ZNF785	zinc finger protein 785	ci	NA	0.11	0.05	0.34	0.22	-0.23	-0.17	-0.11	-0.29
ci@16:30762602:30762870:+|16:30762602:30762603:+.1	chr16:30762502-30762970	ENSG00000156873	PHKG2	phosphorylase kinase, gamma 2 (testis)	ci	NA	0.45	0.49	0.63	0.68	-0.18	-0.19	-0.23	-0.14
ci@16:30762924:30764553:+|16:30762924:30762925:+.1	chr16:30762824-30764653	ENSG00000156873	PHKG2	phosphorylase kinase, gamma 2 (testis)	ci	NA	0.61	0.61	0.77	0.73	-0.16	-0.12	-0.12	-0.16
ci@16:30768975:30770333:-|16:30770332:30770333:-.1	chr16:30768875-30770433	ENSG00000196118	C16orf93	chromosome 16 open reading frame 93	ci	NA	0.93	0.81	0.88	0.73	0.05	0.08	0.2	-0.07
ci@16:3081151:3085216:-|16:3085215:3085216:-.1	chr16:3081051-3085316	ENSG00000162069	CCDC64B	coiled-coil domain containing 64B	ci	NA	0.78	0.74	0.9	0.88	-0.12	-0.14	-0.1	-0.16
ci@16:31486078:31487333:+|16:31486078:31486079:+.1	chr16:31485978-31487433	ENSG00000140682	TGFB1I1	transforming growth factor beta 1 induced transcript 1	ci	NA	0.71	0.58	0.56	0.3	0.15	0.28	0.41	0.02
ci@16:3179654:3181748:-|16:3181747:3181748:-.1	chr16:3179554-3181848	ENSG00000263072	RP11-473M20.14	NA	ci	NA	0.61	0.53	0.38	0.36	0.23	0.17	0.25	0.15
ci@16:3335239:3335681:+|16:3335239:3335240:+.1	chr16:3335139-3335781	ENSG00000006194	ZNF263	zinc finger protein 263	ci	NA	0.61	0.57	0.84	0.69	-0.23	-0.12	-0.08	-0.27
ci@16:3651192:3652119:-|16:3652118:3652119:-.1	chr16:3651092-3652219	ENSG00000188827	SLX4	SLX4 structure-specific endonuclease subunit homolog (S. cerevisiae)	ci	NA	0.49	0.5	0.91	0.64	-0.42	-0.14	-0.15	-0.41
ci@16:3707817:3707907:+|16:3707817:3707818:+.1	chr16:3707717-3708007	ENSG00000213918	DNASE1	deoxyribonuclease I	ci	NA	0.32	0.29	0.56	0.39	-0.24	-0.1	-0.07	-0.27
ci@16:4411470:4411986:-|16:4411985:4411986:-.1	chr16:4411370-4412086	ENSG00000262246	CORO7	coronin 7	ci	NA	0.92	0.8	0.81	1	0.11	-0.2	-0.08	-0.01
ci@16:457560:460243:+|16:457560:457561:+.1	chr16:457460-460343	ENSG00000242612	DECR2	2,4-dienoyl CoA reductase 2, peroxisomal	ci	NA	0.95	0.81	1	0.97	-0.05	-0.16	-0.02	-0.19
ci@16:46727094:46729474:+|16:46727094:46727095:+.1	chr16:46726994-46729574	ENSG00000091651	ORC6	origin recognition complex, subunit 6	ci	NA	0.84	0.79	0.94	0.91	-0.1	-0.12	-0.07	-0.15
ci@16:4847502:4847715:-|16:4847714:4847715:-.1	chr16:4847402-4847815	ENSG00000067836	ROGDI	rogdi homolog (Drosophila)	ci	NA	0.76	0.78	0.92	0.82	-0.16	-0.04	-0.06	-0.14
ci@16:4847841:4847939:-|16:4847938:4847939:-.1	chr16:4847741-4848039	ENSG00000067836	ROGDI	rogdi homolog (Drosophila)	ci	NA	0.69	0.78	0.88	0.76	-0.19	0.02	-0.07	-0.1
ci@16:4848185:4848570:-|16:4848569:4848570:-.1	chr16:4848085-4848670	ENSG00000067836	ROGDI	rogdi homolog (Drosophila)	ci	NA	0.86	0.86	0.98	0.95	-0.12	-0.09	-0.09	-0.12
ci@16:4849782:4850499:-|16:4850498:4850499:-.1	chr16:4849682-4850599	ENSG00000067836	ROGDI	rogdi homolog (Drosophila)	ci	NA	0.67	0.72	0.88	0.72	-0.21	0	-0.05	-0.16
ci@16:50820857:50821697:+|16:50820857:50820858:+.1	chr16:50820757-50821797	ENSG00000083799	CYLD	cylindromatosis (turban tumor syndrome)	ci	NA	0.84	0.93	0.97	0.94	-0.13	-0.01	-0.1	-0.04
ci@16:54953121:54954210:-|16:54954209:54954210:-.1	chr16:54953021-54954310	ENSG00000245694	CRNDE	NA	ci	NA	0.61	0.64	0.83	0.84	-0.22	-0.2	-0.23	-0.19
ci@16:54957562:54959013:-|16:54959012:54959013:-.1	chr16:54957462-54959113	ENSG00000245694	CRNDE	NA	ci	NA	0.86	0.87	0.97	0.96	-0.11	-0.09	-0.1	-0.1
ci@16:55361805:55362612:+|16:55361805:55361806:+.1	chr16:55361705-55362712	ENSG00000159387	IRX6	iroquois homeobox 6	ci	NA	0.62	0.84	0.75	0.96	-0.13	-0.12	-0.34	0.09
ci@16:57507407:57507525:-|16:57507524:57507525:-.1	chr16:57507307-57507625	ENSG00000125170	DOK4	docking protein 4	ci	NA	0.66	0.65	0.86	0.75	-0.2	-0.1	-0.09	-0.21
ci@16:58192257:58197958:-|16:58197957:58197958:-.1	chr16:58192157-58198058	ENSG00000070770	CSNK2A2	casein kinase 2, alpha prime polypeptide	ci	NA	0.48	0.49	0.63	0.54	-0.15	-0.05	-0.06	-0.14
ci@16:58540518:58540816:+|16:58540518:58540519:+.1	chr16:58540418-58540916	ENSG00000103034	NDRG4	NDRG family member 4	ci	NA	0.95	0.97	0.78	0.91	0.17	0.06	0.04	0.19
ci@16:58541903:58542866:+|16:58541903:58541904:+.1	chr16:58541803-58542966	ENSG00000103034	NDRG4	NDRG family member 4	ci	NA	0.96	0.99	0.44	0.7	0.52	0.29	0.26	0.55
ci@16:58542913:58543058:+|16:58542913:58542914:+.1	chr16:58542813-58543158	ENSG00000103034	NDRG4	NDRG family member 4	ci	NA	0.99	0.94	0.58	0.83	0.41	0.11	0.16	0.36
ci@16:58549784:58549857:+|16:58549784:58549785:+.1	chr16:58549684-58549957	ENSG00000103037	SETD6	SET domain containing 6	ci	NA	0.68	0.81	0.68	0.58	0	0.23	0.1	0.13
ci@16:602530:602605:+|16:602530:602531:+.1	chr16:602430-602705	ENSG00000103326	SOLH	small optic lobes homolog (Drosophila)	ci	NA	0.85	0.9	0.84	0.97	0.01	-0.07	-0.12	0.06
ci@16:66651261:66655965:-|16:66655964:66655965:-.1	chr16:66651161-66656065	ENSG00000183723	CMTM4	CKLF-like MARVEL transmembrane domain containing 4	ci	NA	0	0.01	0.1	0.01	-0.1	0	-0.01	-0.09
ci@16:66766377:66768121:-|16:66768120:66768121:-.1	chr16:66766277-66768221	ENSG00000135720	DYNC1LI2	dynein, cytoplasmic 1, light intermediate chain 2	ci	NA	0.82	0.86	0.98	0.85	-0.16	0.01	-0.03	-0.12
ci@16:67179322:67179473:+|16:67179322:67179323:+.1	chr16:67179222-67179573	ENSG00000125149	C16orf70	chromosome 16 open reading frame 70	ci	NA	1	1	0.86	0.95	0.14	0.05	0.05	0.14
ci@16:67179531:67180181:+|16:67179531:67179532:+.1	chr16:67179431-67180281	ENSG00000125149	C16orf70	chromosome 16 open reading frame 70	ci	NA	0.95	1	0.86	0.94	0.09	0.06	0.01	0.14
ci@16:67195840:67196751:+|16:67195840:67195841:+.1	chr16:67195740-67196851	ENSG00000135722	FBXL8	F-box and leucine-rich repeat protein 8	ci	NA	0.57	0.47	0.31	0.32	0.26	0.15	0.25	0.16
ci@16:67197755:67197922:+|16:67197755:67197756:+.1	chr16:67197655-67198022	ENSG00000102878	HSF4	heat shock transcription factor 4	ci	NA	0.55	0.7	0.86	0.62	-0.31	0.08	-0.07	-0.16
ci@16:67692982:67693132:-|16:67693131:67693132:-.1	chr16:67692882-67693232	ENSG00000102977	ACD	adrenocortical dysplasia homolog (mouse)	ci	NA	0.71	0.67	0.89	0.82	-0.18	-0.15	-0.11	-0.22
ci@16:67693166:67693278:-|16:67693277:67693278:-.1	chr16:67693066-67693378	ENSG00000102977	ACD	adrenocortical dysplasia homolog (mouse)	ci	NA	0.79	0.73	0.87	0.86	-0.08	-0.13	-0.07	-0.14
ci@16:67693322:67693440:-|16:67693439:67693440:-.1	chr16:67693222-67693540	ENSG00000102977	ACD	adrenocortical dysplasia homolog (mouse)	ci	NA	0.74	0.8	0.87	0.81	-0.13	-0.01	-0.07	-0.07
ci@16:67979985:67980074:-|16:67980073:67980074:-.1	chr16:67979885-67980174	ENSG00000124067	SLC12A4	solute carrier family 12 (potassium/chloride transporters), member 4	ci	NA	0.89	0.98	0.9	0.77	-0.01	0.21	0.12	0.08
ci@16:67981691:67981964:-|16:67981963:67981964:-.1	chr16:67981591-67982064	ENSG00000124067	SLC12A4	solute carrier family 12 (potassium/chloride transporters), member 4	ci	NA	0.9	0.91	0.68	0.87	0.22	0.04	0.03	0.23
ci@16:67988676:67991645:-|16:67991644:67991645:-.1	chr16:67988576-67991745	ENSG00000124067	SLC12A4	solute carrier family 12 (potassium/chloride transporters), member 4	ci	NA	0.75	0.63	0.54	0.47	0.21	0.16	0.28	0.09
ci@16:68592471:68596947:+|16:68592471:68592472:+.1	chr16:68592371-68597047	ENSG00000184939	ZFP90	ZFP90 zinc finger protein	ci	NA	0.89	0.78	0.98	0.98	-0.09	-0.2	-0.09	-0.2
ci@16:70501374:70501789:+|16:70501374:70501375:+.1	chr16:70501274-70501889	ENSG00000157353	FUK	fucokinase	ci	NA	0.69	0.79	0.81	0.97	-0.12	-0.18	-0.28	-0.02
ci@16:710714:711051:+|16:710714:710715:+.1	chr16:710614-711151	ENSG00000161996	WDR90	WD repeat domain 90	ci	NA	0.89	0.87	0.9	1	-0.01	-0.13	-0.11	-0.03
ci@16:72834028:72845476:-|16:72845475:72845476:-.1	chr16:72833928-72845576	ENSG00000140836	ZFHX3	zinc finger homeobox 3	ci	NA	0.98	0.98	0.86	0.84	0.12	0.14	0.14	0.12
ci@16:732076:732165:+|16:732076:732077:+.1	chr16:731976-732265	ENSG00000103266	STUB1	STIP1 homology and U-box containing protein 1, E3 ubiquitin protein ligase	ci	NA	0.56	0.49	0.63	0.6	-0.07	-0.11	-0.04	-0.14
ci@16:732281:732364:+|16:732281:732282:+.1	chr16:732181-732464	ENSG00000103266	STUB1	STIP1 homology and U-box containing protein 1, E3 ubiquitin protein ligase	ci	NA	0.59	0.61	0.71	0.68	-0.12	-0.07	-0.09	-0.1
ci@16:75589871:75589969:-|16:75589968:75589969:-.1	chr16:75589771-75590069	ENSG00000205084	TMEM231	transmembrane protein 231	ci	NA	0.99	1	0.86	0.85	0.13	0.15	0.14	0.14
ci@16:774205:774322:-|16:774321:774322:-.1	chr16:774105-774422	ENSG00000162004	CCDC78	coiled-coil domain containing 78	ci	NA	0.88	0.76	0.97	0.84	-0.09	-0.08	0.04	-0.21
ci@16:774509:774681:-|16:774680:774681:-.1	chr16:774409-774781	ENSG00000162004	CCDC78	coiled-coil domain containing 78	ci	NA	0.14	0.27	0.08	0.03	0.06	0.24	0.11	0.19
ci@16:774806:774911:-|16:774910:774911:-.1	chr16:774706-775011	ENSG00000162004	CCDC78	coiled-coil domain containing 78	ci	NA	0.62	0.34	0.59	0.75	0.03	-0.41	-0.13	-0.25
ci@16:775145:775237:-|16:775236:775237:-.1	chr16:775045-775337	ENSG00000162004	CCDC78	coiled-coil domain containing 78	ci	NA	0.79	0.73	0.56	0.67	0.23	0.06	0.12	0.17
ci@16:836377:836827:-|16:836826:836827:-.1	chr16:836277-836927	ENSG00000007376	RPUSD1	RNA pseudouridylate synthase domain containing 1	ci	NA	0.91	0.83	0.92	0.94	-0.01	-0.11	-0.03	-0.09
ci@16:840666:841161:+|16:840666:840667:+.1	chr16:840566-841261	ENSG00000127586	CHTF18	CTF18, chromosome transmission fidelity factor 18 homolog (S. cerevisiae)	ci	NA	0.37	0.31	0.59	0.66	-0.22	-0.35	-0.29	-0.28
ci@16:841370:841851:+|16:841370:841371:+.1	chr16:841270-841951	ENSG00000127586	CHTF18	CTF18, chromosome transmission fidelity factor 18 homolog (S. cerevisiae)	ci	NA	0.39	0.47	0.61	0.61	-0.22	-0.14	-0.22	-0.14
ci@16:841948:842224:+|16:841948:841949:+.1	chr16:841848-842324	ENSG00000127586	CHTF18	CTF18, chromosome transmission fidelity factor 18 homolog (S. cerevisiae)	ci	NA	0.44	0.43	0.6	0.52	-0.16	-0.09	-0.08	-0.17
ci@16:84488590:84492726:+|16:84488590:84488591:+.1	chr16:84488490-84492826	ENSG00000064270	ATP2C2	ATPase, Ca++ transporting, type 2C, member 2	ci	NA	0.83	0.83	1	0.86	-0.17	-0.03	-0.03	-0.17
ci@16:84492794:84492876:+|16:84492794:84492795:+.1	chr16:84492694-84492976	ENSG00000064270	ATP2C2	ATPase, Ca++ transporting, type 2C, member 2	ci	NA	0.94	0.96	0.65	0.57	0.29	0.39	0.37	0.31
ci@16:85696699:85696950:+|16:85696699:85696700:+.1	chr16:85696599-85697050	ENSG00000131149	GSE1	Gse1 coiled-coil protein	ci	NA	0.71	0.67	0.92	0.9	-0.21	-0.23	-0.19	-0.25
ci@16:89265205:89265431:-|16:89265430:89265431:-.1	chr16:89265105-89265531	ENSG00000259803	SLC22A31	NA	ci	NA	0.38	0.32	0.59	0.52	-0.21	-0.2	-0.14	-0.27
ci@16:89265599:89265821:-|16:89265820:89265821:-.1	chr16:89265499-89265921	ENSG00000259803	SLC22A31	NA	ci	NA	0.7	0.58	0.72	0.8	-0.02	-0.22	-0.1	-0.14
ci@16:89265975:89266121:-|16:89266120:89266121:-.1	chr16:89265875-89266221	ENSG00000259803	SLC22A31	NA	ci	NA	0.33	0.4	0.48	0.52	-0.15	-0.12	-0.19	-0.08
ci@16:89760640:89761073:+|16:89760640:89760641:+.1	chr16:89760540-89761173	ENSG00000185324	CDK10	cyclin-dependent kinase 10	ci	NA	0.6	0.58	0.69	0.59	-0.09	-0.01	0.01	-0.11
ci@16:89761196:89761339:+|16:89761196:89761197:+.1	chr16:89761096-89761439	ENSG00000185324	CDK10	cyclin-dependent kinase 10	ci	NA	0.59	0.72	0.78	0.76	-0.19	-0.04	-0.17	-0.06
ci@16:89774362:89774835:-|16:89774834:89774835:-.1	chr16:89774262-89774935	ENSG00000075399	VPS9D1	VPS9 domain containing 1	ci	NA	0.8	0.72	0.91	1	-0.11	-0.28	-0.2	-0.19
ci@16:89777820:89778290:-|16:89778289:89778290:-.1	chr16:89777720-89778390	ENSG00000075399	VPS9D1	VPS9 domain containing 1	ci	NA	0.51	0.78	0.87	0.71	-0.36	0.07	-0.2	-0.09
ci@16:89778377:89778455:-|16:89778454:89778455:-.1	chr16:89778277-89778555	ENSG00000075399	VPS9D1	VPS9 domain containing 1	ci	NA	0.23	0.25	0.47	0.25	-0.24	0	-0.02	-0.22
ci@16:89778507:89778868:-|16:89778867:89778868:-.1	chr16:89778407-89778968	ENSG00000075399	VPS9D1	VPS9 domain containing 1	ci	NA	0.31	0.15	0.6	0.37	-0.29	-0.22	-0.06	-0.45
ci@16:89778930:89779013:-|16:89779012:89779013:-.1	chr16:89778830-89779113	ENSG00000075399	VPS9D1	VPS9 domain containing 1	ci	NA	0.9	0.8	0.96	0.89	-0.06	-0.09	0.01	-0.16
ci@16:89779124:89782870:-|16:89782869:89782870:-.1	chr16:89779024-89782970	ENSG00000075399	VPS9D1	VPS9 domain containing 1	ci	NA	0.61	0.57	0.88	0.53	-0.27	0.04	0.08	-0.31
ci@16:89783032:89783138:-|16:89783137:89783138:-.1	chr16:89782932-89783238	ENSG00000075399	VPS9D1	VPS9 domain containing 1	ci	NA	0.24	0.31	0.41	0.22	-0.17	0.09	0.02	-0.1
ci@16:89804313:89804384:+|16:89804313:89804314:+.1	chr16:89804213-89804484	ENSG00000158805	ZNF276	zinc finger protein 276	ci	NA	0.65	0.6	0.77	0.65	-0.12	-0.05	0	-0.17
ci@16:89805697:89805886:-|16:89805885:89805886:-.1	chr16:89805597-89805986	ENSG00000187741	FANCA	Fanconi anemia, complementation group A	ci	NA	0.49	0.63	0.4	0.52	0.09	0.11	-0.03	0.23
ci@16:89806507:89807212:-|16:89807211:89807212:-.1	chr16:89806407-89807312	ENSG00000187741	FANCA	Fanconi anemia, complementation group A	ci	NA	0.69	0.75	0.52	0.69	0.17	0.06	0	0.23
ci@16:90025563:90027339:+|16:90025563:90025564:+.1	chr16:90025463-90027439	ENSG00000140995	DEF8	differentially expressed in FDCP 8 homolog (mouse)	ci	NA	0.5	0.59	0.46	0.42	0.04	0.17	0.08	0.13
ci@16:9197116:9210525:+|16:9197116:9197117:+.1	chr16:9197016-9210625	ENSG00000182831	C16orf72	chromosome 16 open reading frame 72	ci	NA	0.65	0.68	0.84	0.68	-0.19	0	-0.03	-0.16
ci@17:1587876:1588074:-|17:1588073:1588074:-.1	chr17:1587776-1588174	ENSG00000174231	PRPF8	PRP8 pre-mRNA processing factor 8 homolog (S. cerevisiae)	ci	NA	0.94	0.95	0.84	0.95	0.1	0	-0.01	0.11
ci@17:15881227:15881358:-|17:15881357:15881358:-.1	chr17:15881127-15881458	ENSG00000214941	ZSWIM7	zinc finger, SWIM-type containing 7	ci	NA	0.32	0.28	0.46	0.44	-0.14	-0.16	-0.12	-0.18
ci@17:17127457:17129490:-|17:17129489:17129490:-.1	chr17:17127357-17129590	ENSG00000154803	FLCN	folliculin	ci	NA	0.88	0.92	1	0.97	-0.12	-0.05	-0.09	-0.08
ci@17:18221463:18225931:+|17:18221463:18221464:+.1	chr17:18221363-18226031	ENSG00000176994	SMCR8	Smith-Magenis syndrome chromosome region, candidate 8	ci	NA	0.81	0.86	0.96	0.93	-0.15	-0.07	-0.12	-0.1
ci@17:18882163:18882862:-|17:18882861:18882862:-.1	chr17:18882063-18882962	ENSG00000188522	FAM83G	family with sequence similarity 83, member G	ci	NA	0.84	0.81	0.88	0.99	-0.04	-0.18	-0.15	-0.07
ci@17:2207311:2218851:+|17:2207311:2207312:+.1	chr17:2207211-2218951	ENSG00000167720	SRR	serine racemase	ci	NA	0.76	0.96	0.83	0.92	-0.07	0.04	-0.16	0.13
ci@17:2224910:2226430:+|17:2224910:2224911:+.1	chr17:2224810-2226530	ENSG00000167720	SRR	serine racemase	ci	NA	0.74	0.72	0.57	0.66	0.17	0.06	0.08	0.15
ci@17:2275782:2276247:+|17:2275782:2275783:+.1	chr17:2275682-2276347	ENSG00000141258	SGSM2	small G protein signaling modulator 2	ci	NA	0.86	0.78	0.85	0.89	0.01	-0.11	-0.03	-0.07
ci@17:26723045:26723176:+|17:26723045:26723046:+.1	chr17:26722945-26723276	ENSG00000004139	SARM1	sterile alpha and TIR motif containing 1	ci	NA	0.51	0.25	0.55	0.43	-0.04	-0.18	0.08	-0.3
ci@17:26726729:26727626:-|17:26727625:26727626:-.1	chr17:26726629-26727726	ENSG00000076351	SLC46A1	solute carrier family 46 (folate transporter), member 1	ci	NA	0.78	0.9	0.59	0.84	0.19	0.06	-0.06	0.31
ci@17:27183600:27184957:+|17:27183600:27183601:+.1	chr17:27183500-27185057	ENSG00000132591	ERAL1	Era G-protein-like 1 (E. coli)	ci	NA	0.91	0.85	0.96	0.96	-0.05	-0.11	-0.05	-0.11
ci@17:27857637:27861136:+|17:27857637:27857638:+.1	chr17:27857537-27861236	ENSG00000160551	TAOK1	TAO kinase 1	ci	NA	0.99	1	0.88	0.95	0.11	0.05	0.04	0.12
ci@17:27939981:27940372:+|17:27939981:27939982:+.1	chr17:27939881-27940472	ENSG00000198720	ANKRD13B	ankyrin repeat domain 13B	ci	NA	0.39	0.43	0.5	0.65	-0.11	-0.22	-0.26	-0.07
ci@17:29113049:29119458:-|17:29119457:29119458:-.1	chr17:29112949-29119558	ENSG00000176390	CRLF3	cytokine receptor-like factor 3	ci	NA	0.62	0.68	0.81	0.69	-0.19	-0.01	-0.07	-0.13
ci@17:29422387:29483001:+|17:29422387:29422388:+.1	chr17:29422287-29483101	ENSG00000196712	NF1	neurofibromin 1	ci	NA	0.83	0.91	0.61	0.75	0.22	0.16	0.08	0.3
ci@17:30362658:30372719:+|17:30362658:30362659:+.1	chr17:30362558-30372819	ENSG00000185158	LRRC37B	leucine rich repeat containing 37B	ci	NA	0.83	0.95	1	0.98	-0.17	-0.03	-0.15	-0.05
ci@17:34868622:34868717:-|17:34868716:34868717:-.1	chr17:34868522-34868817	ENSG00000141140	MYO19	myosin XIX	ci	NA	0.77	0.62	0.86	0.84	-0.09	-0.22	-0.07	-0.24
ci@17:34943675:34945638:+|17:34943675:34943676:+.1	chr17:34943575-34945738	ENSG00000005955	GGNBP2	gametogenetin binding protein 2	ci	NA	0.86	0.88	0.97	0.94	-0.11	-0.06	-0.08	-0.09
ci@17:36099630:36104532:-|17:36104531:36104532:-.1	chr17:36099530-36104632	ENSG00000108753	HNF1B	HNF1 homeobox B	ci	NA	0.78	0.82	0.92	0.78	-0.14	0.04	0	-0.1
ci@17:36347082:36351936:-|17:36351935:36351936:-.1	chr17:36346982-36352036	ENSG00000174093	RP11-1407O15.2	Uncharacterized protein	ci	NA	0.34	0.31	0.5	0.33	-0.16	-0.02	0.01	-0.19
ci@17:36358158:36358299:-|17:36358298:36358299:-.1	chr17:36358058-36358399	ENSG00000174093	RP11-1407O15.2	Uncharacterized protein	ci	NA	0.72	0.74	0.84	0.84	-0.12	-0.1	-0.12	-0.1
ci@17:36358395:36358842:-|17:36358841:36358842:-.1	chr17:36358295-36358942	ENSG00000174093	RP11-1407O15.2	Uncharacterized protein	ci	NA	0.53	0.53	0.6	0.69	-0.07	-0.16	-0.16	-0.07
ci@17:36361804:36365055:-|17:36365054:36365055:-.1	chr17:36361704-36365155	ENSG00000174093	RP11-1407O15.2	Uncharacterized protein	ci	NA	0.61	0.68	0.79	0.86	-0.18	-0.18	-0.25	-0.11
ci@17:36886659:36887013:+|17:36886659:36886660:+.1	chr17:36886559-36887113	ENSG00000230055	CISD3	CDGSH iron sulfur domain 3	ci	NA	0.73	0.75	0.74	0.91	-0.01	-0.16	-0.18	0.01
ci@17:38068750:38073335:-|17:38073334:38073335:-.1	chr17:38068650-38073435	ENSG00000073605	GSDMB	gasdermin B	ci	NA	0.89	0.79	0.94	0.96	-0.05	-0.17	-0.07	-0.15
ci@17:3936296:3937309:-|17:3937308:3937309:-.1	chr17:3936196-3937409	ENSG00000074755	ZZEF1	zinc finger, ZZ-type with EF-hand domain 1	ci	NA	0.94	0.82	1	0.94	-0.06	-0.12	0	-0.18
ci@17:39767973:39768410:-|17:39768409:39768410:-.1	chr17:39767873-39768510	ENSG00000186832	KRT16	keratin 16	ci	NA	0.31	0.24	0.67	0.61	-0.36	-0.37	-0.3	-0.43
ci@17:40263911:40264131:-|17:40264130:40264131:-.1	chr17:40263811-40264231	ENSG00000108771	DHX58	DEXH (Asp-Glu-X-His) box polypeptide 58	ci	NA	0.97	0.95	0.85	0.87	0.12	0.08	0.1	0.1
ci@17:40270421:40271263:-|17:40271262:40271263:-.1	chr17:40270321-40271363	ENSG00000108773	KAT2A	K(lysine) acetyltransferase 2A	ci	NA	0.48	0.45	0.49	0.62	-0.01	-0.17	-0.14	-0.04
ci@17:40725042:40725125:-|17:40725124:40725125:-.1	chr17:40724942-40725225	ENSG00000131470	PSMC3IP	PSMC3 interacting protein	ci	NA	0.77	0.84	0.69	0.81	0.08	0.03	-0.04	0.15
ci@17:42228412:42230005:+|17:42228412:42228413:+.1	chr17:42228312-42230105	ENSG00000125319	C17orf53	chromosome 17 open reading frame 53	ci	NA	0.7	0.85	0.88	0.88	-0.18	-0.03	-0.18	-0.03
ci@17:43003554:43003782:-|17:43003781:43003782:-.1	chr17:43003454-43003882	ENSG00000186185	KIF18B	kinesin family member 18B	ci	NA	0.12	0.08	0.25	0.22	-0.13	-0.14	-0.1	-0.17
ci@17:43342167:43342530:-|17:43342529:43342530:-.1	chr17:43342067-43342630	ENSG00000006062	MAP3K14	NA	ci	NA	0.58	0.68	0.83	0.9	-0.25	-0.22	-0.32	-0.15
ci@17:43716886:43717755:+|17:43716886:43716887:+.1	chr17:43716786-43717855	ENSG00000167159	NA	NA	ci	NA	0.14	0.05	0.38	0.16	-0.24	-0.11	-0.02	-0.33
ci@17:45894238:45894622:-|17:45894621:45894622:-.1	chr17:45894138-45894722	ENSG00000006025	OSBPL7	oxysterol binding protein-like 7	ci	NA	0.85	0.89	0.85	0.97	0	-0.08	-0.12	0.04
ci@17:45896465:45897095:-|17:45897094:45897095:-.1	chr17:45896365-45897195	ENSG00000006025	OSBPL7	oxysterol binding protein-like 7	ci	NA	0.75	0.64	0.84	0.86	-0.09	-0.22	-0.11	-0.2
ci@17:45917009:45917557:-|17:45917556:45917557:-.1	chr17:45916909-45917657	ENSG00000141295	SCRN2	secernin 2	ci	NA	0.78	0.76	0.9	0.84	-0.12	-0.08	-0.06	-0.14
ci@17:45992754:45993522:+|17:45992754:45992755:+.1	chr17:45992654-45993622	ENSG00000167182	SP2	Sp2 transcription factor	ci	NA	0.94	0.98	0.95	0.84	-0.01	0.14	0.1	0.03
ci@17:46051814:46052525:+|17:46051814:46051815:+.1	chr17:46051714-46052625	ENSG00000108465	CDK5RAP3	CDK5 regulatory subunit associated protein 3	ci	NA	0.4	0.39	0.39	0.53	0.01	-0.14	-0.13	0
ci@17:4634869:4635071:+|17:4634869:4634870:+.1	chr17:4634769-4635171	ENSG00000161920	MED11	mediator complex subunit 11	ci	NA	0.85	0.94	0.94	0.97	-0.09	-0.03	-0.12	0
ci@17:48618423:48618590:+|17:48618423:48618424:+.1	chr17:48618323-48618690	ENSG00000049283	EPN3	epsin 3	ci	NA	0.86	0.92	0.99	0.99	-0.13	-0.07	-0.13	-0.07
ci@17:48618694:48618825:+|17:48618694:48618695:+.1	chr17:48618594-48618925	ENSG00000049283	EPN3	epsin 3	ci	NA	0.98	0.79	0.99	1	-0.01	-0.21	-0.02	-0.2
ci@17:48619055:48619205:+|17:48619055:48619056:+.1	chr17:48618955-48619305	ENSG00000049283	EPN3	epsin 3	ci	NA	0.86	0.88	0.96	1	-0.1	-0.12	-0.14	-0.08
ci@17:48828055:48829561:+|17:48828055:48828056:+.1	chr17:48827955-48829661	ENSG00000108848	LUC7L3	LUC7-like 3 (S. cerevisiae)	ci	NA	0.34	0.34	0.47	0.43	-0.13	-0.09	-0.09	-0.13
ci@17:48944963:48945166:-|17:48945165:48945166:-.1	chr17:48944863-48945266	ENSG00000141232	TOB1	transducer of ERBB2, 1	ci	NA	0.03	0.22	0	0.07	0.03	0.15	-0.04	0.22
ci@17:5241433:5250085:+|17:5241433:5241434:+.1	chr17:5241333-5250185	ENSG00000029725	RABEP1	rabaptin, RAB GTPase binding effector protein 1	ci	NA	0.91	0.96	0.8	0.9	0.11	0.06	0.01	0.16
ci@17:53029473:53038480:-|17:53038479:53038480:-.1	chr17:53029373-53038580	ENSG00000166260	COX11	cytochrome c oxidase assembly homolog 11 (yeast)	ci	NA	0.03	0.07	0.39	0.29	-0.36	-0.22	-0.26	-0.32
ci@17:5383902:5384616:-|17:5384615:5384616:-.1	chr17:5383802-5384716	ENSG00000072849	DERL2	derlin 2	ci	NA	0.78	0.84	0.71	0.74	0.07	0.1	0.04	0.13
ci@17:5388536:5389389:-|17:5389388:5389389:-.1	chr17:5388436-5389489	ENSG00000072849	DERL2	derlin 2	ci	NA	0.93	0.96	0.87	0.85	0.06	0.11	0.08	0.09
ci@17:54912620:54921380:+|17:54912620:54912621:+.1	chr17:54912520-54921480	ENSG00000153933	DGKE	diacylglycerol kinase, epsilon 64kDa	ci	NA	0.81	0.67	0.89	0.85	-0.08	-0.18	-0.04	-0.22
ci@17:55944776:55945511:-|17:55945510:55945511:-.1	chr17:55944676-55945611	ENSG00000180891	CUEDC1	CUE domain containing 1	ci	NA	0.71	0.69	0.84	0.82	-0.13	-0.13	-0.11	-0.15
ci@17:56066627:56067010:-|17:56067009:56067010:-.1	chr17:56066527-56067110	ENSG00000264112	RP11-159D12.2	NA	ci	NA	0.28	0.32	0.48	0.43	-0.2	-0.11	-0.15	-0.16
ci@17:56067157:56068243:-|17:56068242:56068243:-.1	chr17:56067057-56068343	ENSG00000264112	RP11-159D12.2	NA	ci	NA	0.62	0.47	0.61	0.55	0.01	-0.08	0.07	-0.14
ci@17:56082961:56083162:-|17:56083161:56083162:-.1	chr17:56082861-56083262	ENSG00000136450	SRSF1	serine/arginine-rich splicing factor 1	ci	NA	0.74	0.71	0.73	0.83	0.01	-0.12	-0.09	-0.02
ci@17:56288383:56289739:-|17:56289738:56289739:-.1	chr17:56288283-56289839	ENSG00000011143	MKS1	Meckel syndrome, type 1	ci	NA	0.85	0.86	0.97	0.91	-0.12	-0.05	-0.06	-0.11
ci@17:56432347:56434829:-|17:56434828:56434829:-.1	chr17:56432247-56434929	ENSG00000108375	RNF43	ring finger protein 43	ci	NA	0.86	0.8	0.97	0.87	-0.11	-0.07	-0.01	-0.17
ci@17:57060282:57076742:-|17:57076741:57076742:-.1	chr17:57060182-57076842	ENSG00000108395	TRIM37	tripartite motif containing 37	ci	NA	0.07	0.06	0.23	0.18	-0.16	-0.12	-0.11	-0.17
ci@17:57915758:57917129:+|17:57915758:57915759:+.1	chr17:57915658-57917229	ENSG00000062716	VMP1	vacuole membrane protein 1	ci	NA	0.69	0.72	0.84	0.84	-0.15	-0.12	-0.15	-0.12
ci@17:61781111:61781365:-|17:61781364:61781365:-.1	chr17:61781011-61781465	ENSG00000266173	STRADA	STE20-related kinase adaptor alpha	ci	NA	0.72	0.76	0.86	0.82	-0.14	-0.06	-0.1	-0.1
ci@17:61875459:61876949:+|17:61875459:61875460:+.1	chr17:61875359-61877049	ENSG00000198231	DDX42	DEAD (Asp-Glu-Ala-Asp) box polypeptide 42	ci	NA	0.79	0.81	0.9	0.85	-0.11	-0.04	-0.06	-0.09
ci@17:62080285:62081004:-|17:62081003:62081004:-.1	chr17:62080185-62081104	ENSG00000108622	ICAM2	intercellular adhesion molecule 2	ci	NA	0.86	0.88	0.97	0.96	-0.11	-0.08	-0.1	-0.09
ci@17:62476506:62479036:-|17:62479035:62479036:-.1	chr17:62476406-62479136	ENSG00000256525	POLG2	polymerase (DNA directed), gamma 2, accessory subunit	ci	NA	0.83	0.78	0.9	0.96	-0.07	-0.18	-0.13	-0.12
ci@17:62479116:62481845:-|17:62481844:62481845:-.1	chr17:62479016-62481945	ENSG00000256525	POLG2	polymerase (DNA directed), gamma 2, accessory subunit	ci	NA	0.51	0.67	0.66	0.7	-0.15	-0.03	-0.19	0.01
ci@17:62481985:62486913:-|17:62486912:62486913:-.1	chr17:62481885-62487013	ENSG00000256525	POLG2	polymerase (DNA directed), gamma 2, accessory subunit	ci	NA	0.86	0.68	0.94	0.89	-0.08	-0.21	-0.03	-0.26
ci@17:62496891:62498128:-|17:62498127:62498128:-.1	chr17:62496791-62498228	ENSG00000108654	DDX5	DEAD (Asp-Glu-Ala-Asp) box helicase 5	ci	NA	0.35	0.38	0.71	0.64	-0.36	-0.26	-0.29	-0.33
ci@17:62964499:62968652:-|17:62968651:62968652:-.1	chr17:62964399-62968752	ENSG00000214174	AMZ2P1	NA	ci	NA	0.86	0.81	0.94	0.97	-0.08	-0.16	-0.11	-0.13
ci@17:65822453:65850056:+|17:65822453:65822454:+.1	chr17:65822353-65850156	ENSG00000171634	BPTF	bromodomain PHD finger transcription factor	ci	NA	0.84	0.87	0.61	0.81	0.23	0.06	0.03	0.26
ci@17:66536107:66536990:-|17:66536989:66536990:-.1	chr17:66536007-66537090	ENSG00000108950	FAM20A	family with sequence similarity 20, member A	ci	NA	0.9	0.86	0.97	0.91	-0.07	-0.05	-0.01	-0.11
ci@17:6939900:6940046:+|17:6939900:6939901:+.1	chr17:6939800-6940146	ENSG00000174327	SLC16A13	solute carrier family 16, member 13 (monocarboxylic acid transporter 13)	ci	NA	0.75	0.72	0.66	0.54	0.09	0.18	0.21	0.06
ci@17:7125400:7125496:+|17:7125400:7125401:+.1	chr17:7125300-7125596	ENSG00000072778	ACADVL	acyl-CoA dehydrogenase, very long chain	ci	NA	0.6	0.58	0.7	0.74	-0.1	-0.16	-0.14	-0.12
ci@17:7125621:7125986:+|17:7125621:7125622:+.1	chr17:7125521-7126086	ENSG00000072778	ACADVL	acyl-CoA dehydrogenase, very long chain	ci	NA	0.76	0.77	0.86	0.88	-0.1	-0.11	-0.12	-0.09
ci@17:7126184:7126452:+|17:7126184:7126185:+.1	chr17:7126084-7126552	ENSG00000072778	ACADVL	acyl-CoA dehydrogenase, very long chain	ci	NA	0.58	0.55	0.69	0.7	-0.11	-0.15	-0.12	-0.14
ci@17:7160357:7161907:+|17:7160357:7160358:+.1	chr17:7160257-7162007	ENSG00000170291	ELP5	elongator acetyltransferase complex subunit 5	ci	NA	0.88	0.81	0.85	0.73	0.03	0.08	0.15	-0.04
ci@17:7162245:7162890:+|17:7162245:7162246:+.1	chr17:7162145-7162990	ENSG00000170291	ELP5	elongator acetyltransferase complex subunit 5	ci	NA	0.71	0.65	0.73	0.5	-0.02	0.15	0.21	-0.08
ci@17:7165662:7166478:-|17:7166477:7166478:-.1	chr17:7165562-7166578	ENSG00000181885	CLDN7	claudin 7	ci	NA	0.63	0.57	0.6	0.73	0.03	-0.16	-0.1	-0.03
ci@17:7217040:7217225:-|17:7217224:7217225:-.1	chr17:7216940-7217325	ENSG00000261915	GPS2	G protein pathway suppressor 2	ci	NA	0.8	0.84	0.91	0.91	-0.11	-0.07	-0.11	-0.07
ci@17:7218438:7218571:-|17:7218570:7218571:-.1	chr17:7218338-7218671	ENSG00000132522	GPS2	G protein pathway suppressor 2	ci	NA	0.53	0.57	0.3	0.3	0.23	0.27	0.23	0.27
ci@17:7221675:7221814:-|17:7221813:7221814:-.1	chr17:7221575-7221914	ENSG00000215041	NEURL4	neuralized homolog 4 (Drosophila)	ci	NA	0.88	0.85	0.95	0.97	-0.07	-0.12	-0.09	-0.1
ci@17:7225106:7225184:-|17:7225183:7225184:-.1	chr17:7225006-7225284	ENSG00000215041	NEURL4	neuralized homolog 4 (Drosophila)	ci	NA	0.82	0.82	0.82	0.95	0	-0.13	-0.13	0
ci@17:7296683:7296786:-|17:7296785:7296786:-.1	chr17:7296583-7296886	ENSG00000262481	C17orf61-PLSCR3	Uncharacterized protein	ci	NA	0.89	0.79	0.9	0.97	-0.01	-0.18	-0.08	-0.11
ci@17:73100275:73101975:+|17:73100275:73100276:+.1	chr17:73100175-73102075	ENSG00000170190	SLC16A5	solute carrier family 16, member 5 (monocarboxylic acid transporter 6)	ci	NA	0.25	0.22	0.4	0.31	-0.15	-0.09	-0.06	-0.18
ci@17:73236493:73236893:-|17:73236892:73236893:-.1	chr17:73236393-73236993	ENSG00000125447	GGA3	golgi-associated, gamma adaptin ear containing, ARF binding protein 3	ci	NA	0.68	0.64	0.65	0.75	0.03	-0.11	-0.07	-0.01
ci@17:73615879:73615959:+|17:73615879:73615880:+.1	chr17:73615779-73616059	ENSG00000188126	MYO15B	myosin XVB pseudogene	ci	NA	0.46	0.67	0.71	0.65	-0.25	0.02	-0.19	-0.04
ci@17:73616100:73616326:+|17:73616100:73616101:+.1	chr17:73616000-73616426	ENSG00000188126	MYO15B	myosin XVB pseudogene	ci	NA	0.63	0.48	0.79	0.58	-0.16	-0.1	0.05	-0.31
ci@17:73616437:73616547:+|17:73616437:73616438:+.1	chr17:73616337-73616647	ENSG00000188126	MYO15B	myosin XVB pseudogene	ci	NA	0.49	0.3	0.74	0.5	-0.25	-0.2	-0.01	-0.44
ci@17:73616716:73617111:+|17:73616716:73616717:+.1	chr17:73616616-73617211	ENSG00000188126	MYO15B	myosin XVB pseudogene	ci	NA	0.01	0.06	0.09	0.15	-0.08	-0.09	-0.14	-0.03
ci@17:73617256:73617425:+|17:73617256:73617257:+.1	chr17:73617156-73617525	ENSG00000188126	MYO15B	myosin XVB pseudogene	ci	NA	0.19	0.19	0.51	0.56	-0.32	-0.37	-0.37	-0.32
ci@17:73617488:73617581:+|17:73617488:73617489:+.1	chr17:73617388-73617681	ENSG00000188126	MYO15B	myosin XVB pseudogene	ci	NA	0.27	0.22	0.55	0.75	-0.28	-0.53	-0.48	-0.33
ci@17:73618160:73619861:+|17:73618160:73618161:+.1	chr17:73618060-73619961	ENSG00000188126	MYO15B	myosin XVB pseudogene	ci	NA	0.28	0.35	0.42	0.58	-0.14	-0.23	-0.3	-0.07
ci@17:73620144:73620255:+|17:73620144:73620145:+.1	chr17:73620044-73620355	ENSG00000188126	MYO15B	myosin XVB pseudogene	ci	NA	0.24	0.28	0.7	0.58	-0.46	-0.3	-0.34	-0.42
ci@17:73620349:73620450:+|17:73620349:73620350:+.1	chr17:73620249-73620550	ENSG00000188126	MYO15B	myosin XVB pseudogene	ci	NA	0.34	0.31	0.7	0.56	-0.36	-0.25	-0.22	-0.39
ci@17:73620527:73620623:+|17:73620527:73620528:+.1	chr17:73620427-73620723	ENSG00000188126	MYO15B	myosin XVB pseudogene	ci	NA	0.44	0.36	0.74	0.75	-0.3	-0.39	-0.31	-0.38
ci@17:73620719:73620851:+|17:73620719:73620720:+.1	chr17:73620619-73620951	ENSG00000188126	MYO15B	myosin XVB pseudogene	ci	NA	0.33	0.33	0.67	0.53	-0.34	-0.2	-0.2	-0.34
ci@17:73620996:73621203:+|17:73620996:73620997:+.1	chr17:73620896-73621303	ENSG00000188126	MYO15B	myosin XVB pseudogene	ci	NA	0.32	0.45	0.65	0.7	-0.33	-0.25	-0.38	-0.2
ci@17:73621740:73621924:+|17:73621740:73621741:+.1	chr17:73621640-73622024	ENSG00000188126	MYO15B	myosin XVB pseudogene	ci	NA	0.23	0.21	0.74	0.55	-0.51	-0.34	-0.32	-0.53
ci@17:73622057:73622168:+|17:73622057:73622058:+.1	chr17:73621957-73622268	ENSG00000188126	MYO15B	myosin XVB pseudogene	ci	NA	0.24	0.53	0.8	0.44	-0.56	0.09	-0.2	-0.27
ci@17:73622308:73622487:+|17:73622308:73622309:+.1	chr17:73622208-73622587	ENSG00000188126	MYO15B	myosin XVB pseudogene	ci	NA	0.39	0.58	0.87	0.67	-0.48	-0.09	-0.28	-0.29
ci@17:73827250:73827324:-|17:73827323:73827324:-.1	chr17:73827150-73827424	ENSG00000092929	UNC13D	unc-13 homolog D (C. elegans)	ci	NA	1	0.79	1	1	0	-0.21	0	-0.21
ci@17:73924274:73926078:-|17:73926077:73926078:-.1	chr17:73924174-73926178	ENSG00000188878	FBF1	Fas (TNFRSF6) binding factor 1	ci	NA	0.59	0.65	0.94	0.81	-0.35	-0.16	-0.22	-0.29
ci@17:73926128:73927310:-|17:73927309:73927310:-.1	chr17:73926028-73927410	ENSG00000188878	FBF1	Fas (TNFRSF6) binding factor 1	ci	NA	0.48	0.58	0.76	0.72	-0.28	-0.14	-0.24	-0.18
ci@17:73933674:73934228:-|17:73934227:73934228:-.1	chr17:73933574-73934328	ENSG00000188878	FBF1	Fas (TNFRSF6) binding factor 1	ci	NA	0.41	0.43	0.62	0.68	-0.21	-0.25	-0.27	-0.19
ci@17:74730644:74731143:-|17:74731142:74731143:-.1	chr17:74730544-74731243	ENSG00000161547	SRSF2	serine/arginine-rich splicing factor 2	ci	NA	0.12	0.13	0.25	0.14	-0.13	-0.01	-0.02	-0.12
ci@17:7495917:7496012:-|17:7496011:7496012:-.1	chr17:7495817-7496112	ENSG00000129245	FXR2	fragile X mental retardation, autosomal homolog 2	ci	NA	0.93	0.76	0.99	0.94	-0.06	-0.18	-0.01	-0.23
ci@17:7496499:7496721:-|17:7496720:7496721:-.1	chr17:7496399-7496821	ENSG00000129245	FXR2	fragile X mental retardation, autosomal homolog 2	ci	NA	0.92	0.85	0.99	0.96	-0.07	-0.11	-0.04	-0.14
ci@17:7497322:7497556:-|17:7497555:7497556:-.1	chr17:7497222-7497656	ENSG00000129245	FXR2	fragile X mental retardation, autosomal homolog 2	ci	NA	0.94	0.86	1	0.94	-0.06	-0.08	0	-0.14
ci@17:7530544:7530681:-|17:7530680:7530681:-.1	chr17:7530444-7530781	ENSG00000141504	SAT2	spermidine/spermine N1-acetyltransferase family member 2	ci	NA	0.72	0.78	0.87	0.89	-0.15	-0.11	-0.17	-0.09
ci@17:76200822:76200909:+|17:76200822:76200823:+.1	chr17:76200722-76201009	ENSG00000183077	AFMID	arylformamidase	ci	NA	0.49	0.34	0.6	0.41	-0.11	-0.07	0.08	-0.26
ci@17:7696173:7696299:+|17:7696173:7696174:+.1	chr17:7696073-7696399	ENSG00000183914	DNAH2	dynein, axonemal, heavy chain 2	ci	NA	0.91	0.79	0.96	1	-0.05	-0.21	-0.09	-0.17
ci@17:77080033:77080620:+|17:77080033:77080034:+.1	chr17:77079933-77080720	ENSG00000167280	ENGASE	endo-beta-N-acetylglucosaminidase	ci	NA	0.74	0.71	0.89	0.74	-0.15	-0.03	0	-0.18
ci@17:77081816:77082015:+|17:77081816:77081817:+.1	chr17:77081716-77082115	ENSG00000167280	ENGASE	endo-beta-N-acetylglucosaminidase	ci	NA	0.74	0.75	0.9	0.88	-0.16	-0.13	-0.14	-0.15
ci@17:7736246:7736389:+|17:7736246:7736247:+.1	chr17:7736146-7736489	ENSG00000183914	DNAH2	dynein, axonemal, heavy chain 2	ci	NA	0.92	0.83	0.98	0.93	-0.06	-0.1	-0.01	-0.15
ci@17:77809511:77811636:-|17:77811635:77811636:-.1	chr17:77809411-77811736	ENSG00000141582	CBX4	chromobox homolog 4	ci	NA	0.92	0.85	0.97	0.9	-0.05	-0.05	0.02	-0.12
ci@17:78011985:78013611:+|17:78011985:78011986:+.1	chr17:78011885-78013711	ENSG00000141519	CCDC40	coiled-coil domain containing 40	ci	NA	0.93	1	0.85	1	0.08	0	-0.07	0.15
ci@17:78023788:78023863:+|17:78023788:78023789:+.1	chr17:78023688-78023963	ENSG00000141519	CCDC40	coiled-coil domain containing 40	ci	NA	0.73	0.7	0.66	0.94	0.07	-0.24	-0.21	0.04
ci@17:79632614:79633548:-|17:79633547:79633548:-.1	chr17:79632514-79633648	ENSG00000204237	OXLD1	oxidoreductase-like domain containing 1	ci	NA	0.27	0.26	0.39	0.29	-0.12	-0.03	-0.02	-0.13
ci@17:80007718:80007794:-|17:80007793:80007794:-.1	chr17:80007618-80007894	ENSG00000169733	RFNG	RFNG O-fucosylpeptide 3-beta-N-acetylglucosaminyltransferase	ci	NA	0.54	0.53	0.67	0.66	-0.13	-0.13	-0.12	-0.14
ci@17:80007882:80008278:-|17:80008277:80008278:-.1	chr17:80007782-80008378	ENSG00000169733	RFNG	RFNG O-fucosylpeptide 3-beta-N-acetylglucosaminyltransferase	ci	NA	0.43	0.38	0.46	0.55	-0.03	-0.17	-0.12	-0.08
ci@17:80008640:80009170:-|17:80009169:80009170:-.1	chr17:80008540-80009270	ENSG00000169733	RFNG	RFNG O-fucosylpeptide 3-beta-N-acetylglucosaminyltransferase	ci	NA	0.79	0.89	0.82	0.91	-0.03	-0.02	-0.12	0.07
ci@17:80373503:80376288:-|17:80376287:80376288:-.1	chr17:80373403-80376388	ENSG00000181396	OGFOD3	2-oxoglutarate and iron-dependent oxygenase domain containing 3	ci	NA	0.64	0.73	0.56	0.69	0.08	0.04	-0.05	0.17
ci@17:80394614:80395044:+|17:80394614:80394615:+.1	chr17:80394514-80395144	ENSG00000169660	HEXDC	hexosaminidase (glycosyl hydrolase family 20, catalytic domain) containing	ci	NA	0.77	0.75	0.89	0.93	-0.12	-0.18	-0.16	-0.14
ci@17:8051577:8051962:-|17:8051961:8051962:-.1	chr17:8051477-8052062	ENSG00000179094	PER1	period circadian clock 1	ci	NA	0.95	0.87	0.97	1	-0.02	-0.13	-0.05	-0.1
ci@17:8052104:8052577:-|17:8052576:8052577:-.1	chr17:8052004-8052677	ENSG00000179094	PER1	period circadian clock 1	ci	NA	0.82	1	0.99	1	-0.17	0	-0.18	0.01
ci@17:80900538:80901698:-|17:80901697:80901698:-.1	chr17:80900438-80901798	ENSG00000175711	B3GNTL1	UDP-GlcNAc:betaGal beta-1,3-N-acetylglucosaminyltransferase-like 1	ci	NA	0.44	0.17	0.33	0.14	0.11	0.03	0.3	-0.16
ci@17:8133286:8133612:-|17:8133611:8133612:-.1	chr17:8133186-8133712	ENSG00000178971	CTC1	CTS telomere maintenance complex component 1	ci	NA	0.7	0.78	0.8	0.87	-0.1	-0.09	-0.17	-0.02
ci@17:8138244:8138371:-|17:8138370:8138371:-.1	chr17:8138144-8138471	ENSG00000178971	CTC1	CTS telomere maintenance complex component 1	ci	NA	0.99	0.98	0.87	0.94	0.12	0.04	0.05	0.11
ci@18:11886620:11886712:-|18:11886711:11886712:-.1	chr18:11886520-11886812	ENSG00000154889	MPPE1	metallophosphoesterase 1	ci	NA	0.78	0.89	0.95	0.81	-0.17	0.08	-0.03	-0.06
ci@18:12454482:12463350:-|18:12463349:12463350:-.1	chr18:12454382-12463450	ENSG00000134278	SPIRE1	spire homolog 1 (Drosophila)	ci	NA	0.84	0.91	0.96	0.91	-0.12	0	-0.07	-0.05
ci@18:21104138:21104393:+|18:21104138:21104139:+.1	chr18:21104038-21104493	ENSG00000141452	C18orf8	chromosome 18 open reading frame 8	ci	NA	0.85	0.84	0.97	0.91	-0.12	-0.07	-0.06	-0.13
ci@18:21109262:21109599:+|18:21109262:21109263:+.1	chr18:21109162-21109699	ENSG00000141452	C18orf8	chromosome 18 open reading frame 8	ci	NA	0.51	0.44	0.72	0.65	-0.21	-0.21	-0.14	-0.28
ci@18:21109676:21109992:+|18:21109676:21109677:+.1	chr18:21109576-21110092	ENSG00000141452	C18orf8	chromosome 18 open reading frame 8	ci	NA	0.68	0.65	0.87	0.79	-0.19	-0.14	-0.11	-0.22
ci@18:21110096:21110193:+|18:21110096:21110097:+.1	chr18:21109996-21110293	ENSG00000141452	C18orf8	chromosome 18 open reading frame 8	ci	NA	0.74	0.75	0.94	0.84	-0.2	-0.09	-0.1	-0.19
ci@18:21226251:21229047:-|18:21229046:21229047:-.1	chr18:21226151-21229147	ENSG00000154065	ANKRD29	ankyrin repeat domain 29	ci	NA	0.63	0.63	0.51	0.62	0.12	0.01	0.01	0.12
ci@18:32834345:32843477:-|18:32843476:32843477:-.1	chr18:32834245-32843577	ENSG00000186814	ZSCAN30	zinc finger and SCAN domain containing 30	ci	NA	0.84	0.92	0.81	0.68	0.03	0.24	0.16	0.11
ci@18:33760353:33767198:-|18:33767197:33767198:-.1	chr18:33760253-33767298	ENSG00000260552	RP11-49I11.1	NA	ci	NA	0.76	0.79	0.93	0.9	-0.17	-0.11	-0.14	-0.14
ci@18:3594238:3594418:+|18:3594238:3594239:+.1	chr18:3594138-3594518	ENSG00000177337	DLGAP1-AS1	NA	ci	NA	0.55	0.71	0.9	0.93	-0.35	-0.22	-0.38	-0.19
ci@18:3594482:3596577:+|18:3594482:3594483:+.1	chr18:3594382-3596677	ENSG00000177337	DLGAP1-AS1	NA	ci	NA	0.47	0.55	0.9	0.9	-0.43	-0.35	-0.43	-0.35
ci@18:43532609:43534360:-|18:43534359:43534360:-.1	chr18:43532509-43534460	ENSG00000152223	EPG5	ectopic P-granules autophagy protein 5 homolog (C. elegans)	ci	NA	0.97	0.97	0.81	0.91	0.16	0.06	0.06	0.16
ci@18:60242783:60243745:+|18:60242783:60242784:+.1	chr18:60242683-60243845	ENSG00000141664	ZCCHC2	zinc finger, CCHC domain containing 2	ci	NA	0.81	0.81	0.95	0.91	-0.14	-0.1	-0.1	-0.14
ci@18:74528798:74533972:-|18:74533971:74533972:-.1	chr18:74528698-74534072	ENSG00000264278	RP11-162A12.2	Uncharacterized protein	ci	NA	0.33	0.26	0.59	0.58	-0.26	-0.32	-0.25	-0.33
ci@18:77726678:77728089:+|18:77726678:77726679:+.1	chr18:77726578-77728189	ENSG00000226742	HSBP1L1	heat shock factor binding protein 1-like 1	ci	NA	0.7	0.73	0.88	0.74	-0.18	-0.01	-0.04	-0.15
ci@19:10404994:10405077:+|19:10404994:10404995:+.1	chr19:10404894-10405177	ENSG00000105376	ICAM5	intercellular adhesion molecule 5, telencephalin	ci	NA	0.74	0.72	0.89	0.71	-0.15	0.01	0.03	-0.17
ci@19:10419226:10420025:-|19:10420024:10420025:-.1	chr19:10419126-10420125	ENSG00000167807	FDX1L	Adrenodoxin-like protein, mitochondrial	ci	NA	0.56	0.74	0.33	0.45	0.23	0.29	0.11	0.41
ci@19:10464322:10464718:-|19:10464717:10464718:-.1	chr19:10464222-10464818	ENSG00000105397	TYK2	tyrosine kinase 2	ci	NA	0.56	0.62	0.67	0.55	-0.11	0.07	0.01	-0.05
ci@19:11462649:11462733:+|19:11462649:11462650:+.1	chr19:11462549-11462833	ENSG00000183401	CCDC159	coiled-coil domain containing 159	ci	NA	0.84	0.76	0.87	0.98	-0.03	-0.22	-0.14	-0.11
ci@19:11464248:11464468:+|19:11464248:11464249:+.1	chr19:11464148-11464568	ENSG00000183401	CCDC159	coiled-coil domain containing 159	ci	NA	0.67	0.84	0.59	0.78	0.08	0.06	-0.11	0.25
ci@19:11560243:11561461:+|19:11560243:11560244:+.1	chr19:11560143-11561561	ENSG00000130175	PRKCSH	protein kinase C substrate 80K-H	ci	NA	0.5	0.52	0.76	0.73	-0.26	-0.21	-0.23	-0.24
ci@19:1231274:1233425:-|19:1233424:1233425:-.1	chr19:1231174-1233525	ENSG00000099625	C19orf26	chromosome 19 open reading frame 26	ci	NA	0.93	0.76	0.94	0.9	-0.01	-0.14	0.03	-0.18
ci@19:1233635:1234190:-|19:1234189:1234190:-.1	chr19:1233535-1234290	ENSG00000099625	C19orf26	chromosome 19 open reading frame 26	ci	NA	0.71	0.52	0.82	0.67	-0.11	-0.15	0.04	-0.3
ci@19:1234330:1234570:-|19:1234569:1234570:-.1	chr19:1234230-1234670	ENSG00000099625	C19orf26	chromosome 19 open reading frame 26	ci	NA	0.79	0.91	1	0.97	-0.21	-0.06	-0.18	-0.09
ci@19:12834179:12834583:-|19:12834582:12834583:-.1	chr19:12834079-12834683	ENSG00000105576	TNPO2	transportin 2	ci	NA	0.93	0.9	0.91	0.75	0.02	0.15	0.18	-0.01
ci@19:13216210:13216301:-|19:13216300:13216301:-.1	chr19:13216110-13216401	ENSG00000104907	TRMT1	tRNA methyltransferase 1 homolog (S. cerevisiae)	ci	NA	0.56	0.55	0.77	0.7	-0.21	-0.15	-0.14	-0.22
ci@19:14184689:14185202:+|19:14184689:14184690:+.1	chr19:14184589-14185302	ENSG00000141854	CTB-55O6.8	Uncharacterized protein LOC113230	ci	NA	0.31	0.38	0.59	0.38	-0.28	0	-0.07	-0.21
ci@19:1483462:1483649:-|19:1483648:1483649:-.1	chr19:1483362-1483749	ENSG00000115257	PCSK4	proprotein convertase subtilisin/kexin type 4	ci	NA	0.26	0.13	0.59	0.16	-0.33	-0.03	0.1	-0.46
ci@19:15510221:15511106:-|19:15511105:15511106:-.1	chr19:15510121-15511206	ENSG00000011243	AKAP8L	A kinase (PRKA) anchor protein 8-like	ci	NA	0.87	0.84	0.95	0.95	-0.08	-0.11	-0.08	-0.11
ci@19:16631318:16631637:-|19:16631636:16631637:-.1	chr19:16631218-16631737	ENSG00000085872	CHERP	calcium homeostasis endoplasmic reticulum protein	ci	NA	0.78	0.79	0.66	0.79	0.12	0	-0.01	0.13
ci@19:17338814:17339065:+|19:17338814:17338815:+.1	chr19:17338714-17339165	ENSG00000099330	OCEL1	occludin/ELL domain containing 1	ci	NA	0.85	0.88	0.95	0.97	-0.1	-0.09	-0.12	-0.07
ci@19:17339118:17339612:+|19:17339118:17339119:+.1	chr19:17339018-17339712	ENSG00000099330	OCEL1	occludin/ELL domain containing 1	ci	NA	0.81	0.89	0.95	0.9	-0.14	-0.01	-0.09	-0.06
ci@19:17444048:17444231:-|19:17444230:17444231:-.1	chr19:17443948-17444331	ENSG00000074855	ANO8	anoctamin 8	ci	NA	0.94	0.88	1	0.98	-0.06	-0.1	-0.04	-0.12
ci@19:17449835:17449932:+|19:17449835:17449836:+.1	chr19:17449735-17450032	ENSG00000130299	GTPBP3	GTP binding protein 3 (mitochondrial)	ci	NA	0.92	0.83	0.83	0.8	0.09	0.03	0.12	0
ci@19:17524114:17525200:+|19:17524114:17524115:+.1	chr19:17524014-17525300	ENSG00000141971	MVB12A	multivesicular body subunit 12A	ci	NA	0.51	0.53	0.88	0.54	-0.37	-0.01	-0.03	-0.35
ci@19:18245521:18245627:+|19:18245521:18245522:+.1	chr19:18245421-18245727	ENSG00000099308	MAST3	microtubule associated serine/threonine kinase 3	ci	NA	1	1	0.86	1	0.14	0	0	0.14
ci@19:18257827:18258253:+|19:18257827:18257828:+.1	chr19:18257727-18258353	ENSG00000099308	MAST3	microtubule associated serine/threonine kinase 3	ci	NA	0.45	0.32	0.6	0.71	-0.15	-0.39	-0.26	-0.28
ci@19:18879603:18882252:+|19:18879603:18879604:+.1	chr19:18879503-18882352	ENSG00000105662	CRTC1	CREB regulated transcription coactivator 1	ci	NA	0.68	0.62	0.89	0.7	-0.21	-0.08	-0.02	-0.27
ci@19:18886631:18887981:+|19:18886631:18886632:+.1	chr19:18886531-18888081	ENSG00000105662	CRTC1	CREB regulated transcription coactivator 1	ci	NA	0.83	0.78	0.95	0.78	-0.12	0	0.05	-0.17
ci@19:19105295:19105953:-|19:19105952:19105953:-.1	chr19:19105195-19106053	ENSG00000064607	SUGP2	SURP and G patch domain containing 2	ci	NA	0.74	0.72	0.87	0.85	-0.13	-0.13	-0.11	-0.15
ci@19:19261573:19293382:-|19:19293381:19293382:-.1	chr19:19261473-19293482	ENSG00000064489	MEF2BNB-MEF2B	MEF2BNB-MEF2B readthrough	ci	NA	0.17	0.39	0.5	0.63	-0.33	-0.24	-0.46	-0.11
ci@19:19288269:19291495:-|19:19291494:19291495:-.1	chr19:19288169-19291595	ENSG00000254901	MEF2BNB	MEF2B neighbor	ci	NA	0.77	0.81	0.92	0.87	-0.15	-0.06	-0.1	-0.11
ci@19:19414257:19414533:-|19:19414532:19414533:-.1	chr19:19414157-19414633	ENSG00000105705	SUGP1	SURP and G patch domain containing 1	ci	NA	0.86	0.88	0.9	0.97	-0.04	-0.09	-0.11	-0.02
ci@19:19646259:19646338:+|19:19646259:19646260:+.1	chr19:19646159-19646438	ENSG00000250067	YJEFN3	YjeF N-terminal domain containing 3	ci	NA	0.87	1	0.92	0.81	-0.05	0.19	0.06	0.08
ci@19:2046467:2046603:-|19:2046602:2046603:-.1	chr19:2046367-2046703	ENSG00000099875	MKNK2	MAP kinase interacting serine/threonine kinase 2	ci	NA	0.78	0.8	0.66	0.74	0.12	0.06	0.04	0.14
ci@19:2098126:2098286:+|19:2098126:2098127:+.1	chr19:2098026-2098386	ENSG00000099840	IZUMO4	IZUMO family member 4	ci	NA	0.45	0.5	0.16	0.5	0.29	0	-0.05	0.34
ci@19:21216990:21239437:+|19:21216990:21216991:+.1	chr19:21216890-21239537	ENSG00000118620	ZNF430	zinc finger protein 430	ci	NA	0.96	1	0.84	0.96	0.12	0.04	0	0.16
ci@19:2337624:2338751:+|19:2337624:2337625:+.1	chr19:2337524-2338851	ENSG00000005206	SPPL2B	NA	ci	NA	0.57	0.54	0.61	0.73	-0.04	-0.19	-0.16	-0.07
ci@19:23442918:23443666:-|19:23443665:23443666:-.1	chr19:23442818-23443766	ENSG00000213971	RP11-15H20.6	NA	ci	NA	0.65	0.89	0.85	0.53	-0.2	0.36	0.12	0.04
ci@19:23837508:23844916:-|19:23844915:23844916:-.1	chr19:23837408-23845016	ENSG00000197372	ZNF675	zinc finger protein 675	ci	NA	0.84	0.84	1	0.94	-0.16	-0.1	-0.1	-0.16
ci@19:2827741:2832301:+|19:2827741:2827742:+.1	chr19:2827641-2832401	ENSG00000172006	ZNF554	zinc finger protein 554	ci	NA	0.7	0.88	0.76	0.65	-0.06	0.23	0.05	0.12
ci@19:36032486:36032653:-|19:36032652:36032653:-.1	chr19:36032386-36032753	ENSG00000236144	AD000090.2	NA	ci	NA	0.18	0.39	0.58	0.45	-0.4	-0.06	-0.27	-0.19
ci@19:36032976:36033813:-|19:36033812:36033813:-.1	chr19:36032876-36033913	ENSG00000236144	AD000090.2	NA	ci	NA	0.29	0.24	0.51	0.44	-0.22	-0.2	-0.15	-0.27
ci@19:36104802:36104937:+|19:36104802:36104803:+.1	chr19:36104702-36105037	ENSG00000249115	HAUS5	HAUS augmin-like complex, subunit 5	ci	NA	0.89	0.9	1	1	-0.11	-0.1	-0.11	-0.1
ci@19:36244154:36244918:+|19:36244154:36244155:+.1	chr19:36244054-36245018	ENSG00000188223	AC002398.9	NA	ci	NA	0.81	0.84	0.93	0.92	-0.12	-0.08	-0.11	-0.09
ci@19:36387030:36387120:-|19:36387119:36387120:-.1	chr19:36386930-36387220	ENSG00000167604	NFKBID	nuclear factor of kappa light polypeptide gene enhancer in B-cells inhibitor, delta	ci	NA	0.45	0.74	0.67	0.75	-0.22	-0.01	-0.3	0.07
ci@19:36387171:36387294:-|19:36387293:36387294:-.1	chr19:36387071-36387394	ENSG00000167604	NFKBID	nuclear factor of kappa light polypeptide gene enhancer in B-cells inhibitor, delta	ci	NA	0.49	0.67	0.83	0.57	-0.34	0.1	-0.08	-0.16
ci@19:37065802:37084748:+|19:37065802:37065803:+.1	chr19:37065702-37084848	ENSG00000233527	AC092295.7	NA	ci	NA	0.48	0.68	0.82	0.42	-0.34	0.26	0.06	-0.14
ci@19:39359806:39359887:-|19:39359886:39359887:-.1	chr19:39359706-39359987	ENSG00000187994	RINL	Ras and Rab interactor-like	ci	NA	0.68	0.66	0.88	0.83	-0.2	-0.17	-0.15	-0.22
ci@19:39398299:39399371:+|19:39398299:39398300:+.1	chr19:39398199-39399471	ENSG00000104825	NFKBIB	nuclear factor of kappa light polypeptide gene enhancer in B-cells inhibitor, beta	ci	NA	0.28	0.3	0.39	0.23	-0.11	0.07	0.05	-0.09
ci@19:39914293:39914373:+|19:39914293:39914294:+.1	chr19:39914193-39914473	ENSG00000090924	PLEKHG2	pleckstrin homology domain containing, family G (with RhoGef domain) member 2	ci	NA	0.79	0.75	0.91	0.8	-0.12	-0.05	-0.01	-0.16
ci@19:40854631:40871460:+|19:40854631:40854632:+.1	chr19:40854531-40871560	ENSG00000105223	PLD3	phospholipase D family, member 3	ci	NA	0.11	0.11	0.24	0.19	-0.13	-0.08	-0.08	-0.13
ci@19:41284296:41285924:+|19:41284296:41284297:+.1	chr19:41284196-41286024	ENSG00000171570	RAB4B-EGLN2	RAB4B-EGLN2 readthrough (non-protein coding)	ci	NA	0.87	0.96	1	0.93	-0.13	0.03	-0.06	-0.04
ci@19:41447377:41447970:+|19:41447377:41447378:+.1	chr19:41447277-41448070	ENSG00000256612	CYP2B7P1	NA	ci	NA	0.63	0.68	0.77	0.67	-0.14	0.01	-0.04	-0.09
ci@19:41448111:41450236:+|19:41448111:41448112:+.1	chr19:41448011-41450336	ENSG00000256612	CYP2B7P1	NA	ci	NA	0.4	0.4	0.51	0.37	-0.11	0.03	0.03	-0.11
ci@19:41884424:41888677:+|19:41884424:41884425:+.1	chr19:41884324-41888777	ENSG00000142046	TMEM91	transmembrane protein 91	ci	NA	0.96	0.97	0.95	0.73	0.01	0.24	0.23	0.02
ci@19:42909713:42910313:-|19:42910312:42910313:-.1	chr19:42909613-42910413	ENSG00000079435	LIPE	lipase, hormone-sensitive	ci	NA	0.81	0.95	0.7	0.63	0.11	0.32	0.18	0.25
ci@19:42911943:42912128:-|19:42912127:42912128:-.1	chr19:42911843-42912228	ENSG00000079435	LIPE	lipase, hormone-sensitive	ci	NA	0.79	0.88	0.93	0.63	-0.14	0.25	0.16	-0.05
ci@19:4442338:4442922:+|19:4442338:4442339:+.1	chr19:4442238-4443022	ENSG00000167670	CHAF1A	chromatin assembly factor 1, subunit A (p150)	ci	NA	0.81	0.82	0.94	0.83	-0.13	-0.01	-0.02	-0.12
ci@19:44426369:44428390:-|19:44428389:44428390:-.1	chr19:44426269-44428490	ENSG00000124459	ZNF45	zinc finger protein 45	ci	NA	1	0.98	0.86	1	0.14	-0.02	0	0.12
ci@19:45575838:45578971:-|19:45578970:45578971:-.1	chr19:45575738-45579071	ENSG00000170684	ZNF296	zinc finger protein 296	ci	NA	0.77	0.87	0.97	0.56	-0.2	0.31	0.21	-0.1
ci@19:45575838:45578971:-|19:45578970:45578971:-.1	chr19:45575738-45579071	ENSG00000170684	ZNF296	zinc finger protein 296	ci	NA	0.77	0.87	0.97	0.56	-0.2	0.31	0.21	-0.1
ci@19:45579120:45579334:-|19:45579333:45579334:-.1	chr19:45579020-45579434	ENSG00000170684	ZNF296	zinc finger protein 296	ci	NA	0.8	0.91	1	0.87	-0.2	0.04	-0.07	-0.09
ci@19:45854005:45854212:+|19:45854005:45854006:+.1	chr19:45853905-45854312	ENSG00000104892	KLC3	kinesin light chain 3	ci	NA	0.39	0.51	0.3	0.31	0.09	0.2	0.08	0.21
ci@19:46122449:46124465:-|19:46124464:46124465:-.1	chr19:46122349-46124565	ENSG00000125746	EML2	echinoderm microtubule associated protein like 2	ci	NA	0.81	0.81	0.94	0.91	-0.13	-0.1	-0.1	-0.13
ci@19:48199769:48201891:+|19:48199769:48199770:+.1	chr19:48199669-48201991	ENSG00000063169	GLTSCR1	glioma tumor suppressor candidate region gene 1	ci	NA	0.93	0.82	0.96	1	-0.03	-0.18	-0.07	-0.14
ci@19:48686024:48697910:+|19:48686024:48686025:+.1	chr19:48685924-48698010	ENSG00000185453	C19orf68	chromosome 19 open reading frame 68	ci	NA	0.93	0.99	0.84	0.92	0.09	0.07	0.01	0.15
ci@19:48994796:48996951:-|19:48996950:48996951:-.1	chr19:48994696-48997051	ENSG00000142235	LMTK3	lemur tyrosine kinase 3	ci	NA	0.95	0.88	0.93	0.65	0.02	0.23	0.3	-0.05
ci@19:49442958:49445697:+|19:49442958:49442959:+.1	chr19:49442858-49445797	ENSG00000104808	DHDH	dihydrodiol dehydrogenase (dimeric)	ci	NA	0.92	0.68	0.91	0.86	0.01	-0.18	0.06	-0.23
ci@19:49447764:49448081:+|19:49447764:49447765:+.1	chr19:49447664-49448181	ENSG00000104808	DHDH	dihydrodiol dehydrogenase (dimeric)	ci	NA	0.84	1	0.99	0.96	-0.15	0.04	-0.12	0.01
ci@19:50016007:50016644:+|19:50016007:50016008:+.1	chr19:50015907-50016744	ENSG00000104870	FCGRT	Fc fragment of IgG, receptor, transporter, alpha	ci	NA	0.63	0.69	0.63	0.81	0	-0.12	-0.18	0.06
ci@19:50086561:50086799:+|19:50086561:50086562:+.1	chr19:50086461-50086899	ENSG00000126460	PRRG2	proline rich Gla (G-carboxyglutamic acid) 2	ci	NA	0.85	0.92	0.9	0.96	-0.05	-0.04	-0.11	0.02
ci@19:50368683:50369656:-|19:50369655:50369656:-.1	chr19:50368583-50369756	ENSG00000039650	PNKP	polynucleotide kinase 3'-phosphatase	ci	NA	0.71	0.76	0.86	0.78	-0.15	-0.02	-0.07	-0.1
ci@19:50432263:50432500:+|19:50432263:50432264:+.1	chr19:50432163-50432600	ENSG00000169136	ATF5	activating transcription factor 5	ci	NA	0.34	0.27	0.33	0.57	0.01	-0.3	-0.23	-0.06
ci@19:50432657:50433989:+|19:50432657:50432658:+.1	chr19:50432557-50434089	ENSG00000169136	ATF5	activating transcription factor 5	ci	NA	0.36	0.4	0.54	0.41	-0.18	-0.01	-0.05	-0.14
ci@19:52597224:52598828:-|19:52598827:52598828:-.1	chr19:52597124-52598928	ENSG00000197608	ZNF841	zinc finger protein 841	ci	NA	0.39	0.48	0.61	0.41	-0.22	0.07	-0.02	-0.13
ci@19:53928400:53928583:+|19:53928400:53928401:+.1	chr19:53928300-53928683	ENSG00000196417	ZNF765	zinc finger protein 765	ci	NA	0.81	0.67	0.44	0.58	0.37	0.09	0.23	0.23
ci@19:54969700:54971946:+|19:54969700:54969701:+.1	chr19:54969600-54972046	ENSG00000167615	LENG8	leukocyte receptor cluster (LRC) member 8	ci	NA	0.08	0.09	0.26	0.21	-0.18	-0.12	-0.13	-0.17
ci@19:55604444:55604521:-|19:55604520:55604521:-.1	chr19:55604344-55604621	ENSG00000125503	PPP1R12C	protein phosphatase 1, regulatory subunit 12C	ci	NA	0.74	0.74	0.87	0.8	-0.13	-0.06	-0.06	-0.13
ci@19:55718567:55720751:-|19:55720750:55720751:-.1	chr19:55718467-55720851	ENSG00000080031	PTPRH	protein tyrosine phosphatase, receptor type, H	ci	NA	0.93	1	0.83	0.91	0.1	0.09	0.02	0.17
ci@19:55855211:55855346:+|19:55855211:55855212:+.1	chr19:55855111-55855446	ENSG00000133247	SUV420H2	suppressor of variegation 4-20 homolog 2 (Drosophila)	ci	NA	0.77	0.7	0.93	0.84	-0.16	-0.14	-0.07	-0.23
ci@19:55855365:55857581:+|19:55855365:55855366:+.1	chr19:55855265-55857681	ENSG00000133247	SUV420H2	suppressor of variegation 4-20 homolog 2 (Drosophila)	ci	NA	0.63	0.61	0.8	0.63	-0.17	-0.02	0	-0.19
ci@19:5611641:5612551:-|19:5612550:5612551:-.1	chr19:5611541-5612651	ENSG00000130254	SAFB2	scaffold attachment factor B2	ci	NA	0.84	0.8	0.92	0.89	-0.08	-0.09	-0.05	-0.12
ci@19:58372841:58373162:+|19:58372841:58372842:+.1	chr19:58372741-58373262	ENSG00000198466	ZNF587	zinc finger protein 587	ci	NA	0.44	0.37	0.65	0.4	-0.21	-0.03	0.04	-0.28
ci@19:58817582:58823532:+|19:58817582:58817583:+.1	chr19:58817482-58823632	ENSG00000083842	ZNF8	zinc finger protein 8	ci	NA	0.78	0.79	0.94	0.92	-0.16	-0.13	-0.14	-0.15
ci@19:58838480:58846118:+|19:58838480:58838481:+.1	chr19:58838380-58846218	ENSG00000182318	ZSCAN22	zinc finger and SCAN domain containing 22	ci	NA	0.25	0.11	0	0.11	0.25	0	0.14	0.11
ci@19:58987871:58988546:+|19:58987871:58987872:+.1	chr19:58987771-58988646	ENSG00000083838	ZNF446	zinc finger protein 446	ci	NA	0.92	0.71	0.96	1	-0.04	-0.29	-0.08	-0.25
ci@19:59074871:59080644:-|19:59080643:59080644:-.1	chr19:59074771-59080744	ENSG00000099326	MZF1	myeloid zinc finger 1	ci	NA	0.53	0.57	0.89	0.66	-0.36	-0.09	-0.13	-0.32
ci@19:59080764:59080883:-|19:59080882:59080883:-.1	chr19:59080664-59080983	ENSG00000099326	MZF1	myeloid zinc finger 1	ci	NA	0.89	0.81	0.9	0.98	-0.01	-0.17	-0.09	-0.09
ci@19:610405:613248:+|19:610405:610406:+.1	chr19:610305-613348	ENSG00000099822	HCN2	hyperpolarization activated cyclic nucleotide-gated potassium channel 2	ci	NA	0.9	0.97	0.52	0.93	0.38	0.04	-0.03	0.45
ci@19:677977:680274:+|19:677977:677978:+.1	chr19:677877-680374	ENSG00000070404	FSTL3	follistatin-like 3 (secreted glycoprotein)	ci	NA	0.62	0.87	0.74	0.68	-0.12	0.19	-0.06	0.13
ci@19:7535201:7535423:+|19:7535201:7535202:+.1	chr19:7535101-7535523	ENSG00000104880	ARHGEF18	Rho/Rac guanine nucleotide exchange factor (GEF) 18	ci	NA	0.47	0.45	0.25	0.33	0.22	0.12	0.14	0.2
ci@19:7591812:7592406:+|19:7591812:7591813:+.1	chr19:7591712-7592506	ENSG00000090674	MCOLN1	mucolipin 1	ci	NA	0.9	0.87	0.98	0.96	-0.08	-0.09	-0.06	-0.11
ci@19:7981827:7982358:+|19:7981827:7981828:+.1	chr19:7981727-7982458	ENSG00000260001	TGFBR3L	transforming growth factor, beta receptor III-like	ci	NA	0.87	1	0.82	0.9	0.05	0.1	-0.03	0.18
ci@19:9038415:9043426:-|19:9043425:9043426:-.1	chr19:9038315-9043526	ENSG00000181143	MUC16	mucin 16, cell surface associated	ci	NA	0.51	0.48	0.83	0.74	-0.32	-0.26	-0.23	-0.35
ci@19:968503:971878:+|19:968503:968504:+.1	chr19:968403-971978	ENSG00000116017	ARID3A	AT rich interactive domain 3A (BRIGHT-like)	ci	NA	0.88	0.8	0.97	0.94	-0.09	-0.14	-0.06	-0.17
ci@2:10132274:10133335:+|2:10132274:10132275:+.1	chr2:10132174-10133435	ENSG00000134317	GRHL1	grainyhead-like 1 (Drosophila)	ci	NA	0.8	0.82	0.89	0.92	-0.09	-0.1	-0.12	-0.07
ci@2:102851737:102855652:+|2:102851737:102851738:+.1	chr2:102851637-102855752	ENSG00000115598	IL1RL2	interleukin 1 receptor-like 2	ci	NA	0.68	0.57	0.55	0.29	0.13	0.28	0.39	0.02
ci@2:105959431:105959558:+|2:105959431:105959432:+.1	chr2:105959331-105959658	ENSG00000135974	C2orf49	chromosome 2 open reading frame 49	ci	NA	0.35	0.26	0.42	0.48	-0.07	-0.22	-0.13	-0.16
ci@2:111878765:111881310:+|2:111878765:111878766:+.1	chr2:111878665-111881410	ENSG00000153094	BCL2L11	BCL2-like 11 (apoptosis facilitator)	ci	NA	0.69	0.69	0.88	0.96	-0.19	-0.27	-0.27	-0.19
ci@2:112760764:112761481:+|2:112760764:112760765:+.1	chr2:112760664-112761581	ENSG00000153208	MERTK	c-mer proto-oncogene tyrosine kinase	ci	NA	0.84	0.81	0.98	0.95	-0.14	-0.14	-0.11	-0.17
ci@2:113240078:113243494:+|2:113240078:113240079:+.1	chr2:113239978-113243594	ENSG00000114999	TTL	tubulin tyrosine ligase	ci	NA	0.98	0.68	1	0.98	-0.02	-0.3	0	-0.32
ci@2:113942650:113942942:+|2:113942650:113942651:+.1	chr2:113942550-113943042	ENSG00000125637	PSD4	pleckstrin and Sec7 domain containing 4	ci	NA	0.9	0.98	0.84	0.94	0.06	0.04	-0.04	0.14
ci@2:114222750:114228610:+|2:114222750:114222751:+.1	chr2:114222650-114228710	ENSG00000136682	CBWD2	COBW domain containing 2	ci	NA	0.84	0.89	0.88	0.98	-0.04	-0.09	-0.14	0.01
ci@2:114390521:114391730:+|2:114390521:114390522:+.1	chr2:114390421-114391830	ENSG00000144134	RABL2A	RAB, member of RAS oncogene family-like 2A	ci	NA	0.66	0.83	0.9	0.84	-0.24	-0.01	-0.18	-0.07
ci@2:114392707:114398471:+|2:114392707:114392708:+.1	chr2:114392607-114398571	ENSG00000144134	RABL2A	RAB, member of RAS oncogene family-like 2A	ci	NA	0.54	0.45	0.71	0.61	-0.17	-0.16	-0.07	-0.26
ci@2:128520733:128522402:-|2:128522401:128522402:-.1	chr2:128520633-128522502	ENSG00000136709	WDR33	WD repeat domain 33	ci	NA	0.78	0.71	0.65	0.72	0.13	-0.01	0.06	0.06
ci@2:128627118:128628388:-|2:128628387:128628388:-.1	chr2:128627018-128628488	ENSG00000144233	AMMECR1L	AMMECR1-like	ci	NA	0.92	0.78	0.95	0.96	-0.03	-0.18	-0.04	-0.17
ci@2:128628502:128628823:-|2:128628822:128628823:-.1	chr2:128628402-128628923	ENSG00000144233	AMMECR1L	AMMECR1-like	ci	NA	0.88	0.86	0.99	1	-0.11	-0.14	-0.12	-0.13
ci@2:131116548:131116806:+|2:131116548:131116549:+.1	chr2:131116448-131116906	ENSG00000072135	PTPN18	protein tyrosine phosphatase, non-receptor type 18 (brain-derived)	ci	NA	0.86	0.93	1	1	-0.14	-0.07	-0.14	-0.07
ci@2:131116882:131116970:+|2:131116882:131116883:+.1	chr2:131116782-131117070	ENSG00000072135	PTPN18	protein tyrosine phosphatase, non-receptor type 18 (brain-derived)	ci	NA	0.87	0.93	0.99	0.92	-0.12	0.01	-0.05	-0.06
ci@2:131117065:131117181:+|2:131117065:131117066:+.1	chr2:131116965-131117281	ENSG00000072135	PTPN18	protein tyrosine phosphatase, non-receptor type 18 (brain-derived)	ci	NA	0.85	0.87	0.99	0.94	-0.14	-0.07	-0.09	-0.12
ci@2:151343969:151344063:-|2:151344062:151344063:-.1	chr2:151343869-151344163	ENSG00000115963	RND3	Rho family GTPase 3	ci	NA	0.91	0.81	0.77	0.69	0.14	0.12	0.22	0.04
ci@2:152112257:152118239:-|2:152118238:152118239:-.1	chr2:152112157-152118339	ENSG00000184898	RBM43	RNA binding motif protein 43	ci	NA	0.94	0.98	0.77	0.94	0.17	0.04	0	0.21
ci@2:165358845:165364965:-|2:165364964:165364965:-.1	chr2:165358745-165365065	ENSG00000115290	GRB14	growth factor receptor-bound protein 14	ci	NA	0.81	0.82	1	0.89	-0.19	-0.07	-0.08	-0.18
ci@2:170428681:170430179:-|2:170430178:170430179:-.1	chr2:170428581-170430279	ENSG00000138399	FASTKD1	FAST kinase domains 1	ci	NA	0.49	0.47	0.59	0.7	-0.1	-0.23	-0.21	-0.12
ci@2:170551757:170553871:+|2:170551757:170551758:+.1	chr2:170551657-170553971	ENSG00000213160	KLHL23	kelch-like family member 23	ci	NA	0.74	0.52	0.96	0.79	-0.22	-0.27	-0.05	-0.44
ci@2:171641343:171649373:+|2:171641343:171641344:+.1	chr2:171641243-171649473	ENSG00000204334	ERICH2	glutamate-rich 2	ci	NA	0.77	0.57	0.57	0.66	0.2	-0.09	0.11	0
ci@2:172330485:172333370:+|2:172330485:172330486:+.1	chr2:172330385-172333470	ENSG00000115827	DCAF17	DDB1 and CUL4 associated factor 17	ci	NA	0.91	0.82	0.97	0.93	-0.06	-0.11	-0.02	-0.15
ci@2:190320170:190322037:+|2:190320170:190320171:+.1	chr2:190320070-190322137	ENSG00000115368	WDR75	WD repeat domain 75	ci	NA	0.84	0.9	0.98	0.96	-0.14	-0.06	-0.12	-0.08
ci@2:190322107:190323479:+|2:190322107:190322108:+.1	chr2:190322007-190323579	ENSG00000115368	WDR75	WD repeat domain 75	ci	NA	0.88	0.97	0.99	0.97	-0.11	0	-0.09	-0.02
ci@2:191839658:191840538:-|2:191840537:191840538:-.1	chr2:191839558-191840638	ENSG00000115415	STAT1	signal transducer and activator of transcription 1, 91kDa	ci	NA	0.78	0.72	0.67	0.74	0.11	-0.02	0.04	0.05
ci@2:197584390:197585299:+|2:197584390:197584391:+.1	chr2:197584290-197585399	ENSG00000144395	CCDC150	coiled-coil domain containing 150	ci	NA	0.93	0.75	1	0.82	-0.07	-0.07	0.11	-0.25
ci@2:197594111:197594517:+|2:197594111:197594112:+.1	chr2:197594011-197594617	ENSG00000144395	CCDC150	coiled-coil domain containing 150	ci	NA	0.09	0.1	0.15	0.33	-0.06	-0.23	-0.24	-0.05
ci@2:200803793:200804812:-|2:200804811:200804812:-.1	chr2:200803693-200804912	ENSG00000162971	TYW5	tRNA-yW synthesizing protein 5	ci	NA	0.93	0.83	0.97	1	-0.04	-0.17	-0.07	-0.14
ci@2:20096887:20097630:-|2:20097629:20097630:-.1	chr2:20096787-20097730	ENSG00000183891	TTC32	tetratricopeptide repeat domain 32	ci	NA	0.54	0.56	0.85	0.87	-0.31	-0.31	-0.33	-0.29
ci@2:20175424:20178512:-|2:20178511:20178512:-.1	chr2:20175324-20178612	ENSG00000118965	WDR35	WD repeat domain 35	ci	NA	0.98	0.98	0.85	0.97	0.13	0.01	0.01	0.13
ci@2:206547629:206547815:+|2:206547629:206547630:+.1	chr2:206547529-206547915	ENSG00000118257	NRP2	neuropilin 2	ci	NA	0.41	0.43	0.63	0.43	-0.22	0	-0.02	-0.2
ci@2:219499353:219500519:+|2:219499353:219499354:+.1	chr2:219499253-219500619	ENSG00000115556	PLCD4	phospholipase C, delta 4	ci	NA	0.24	0.07	0	0.1	0.24	-0.03	0.14	0.07
ci@2:219526268:219526482:+|2:219526268:219526269:+.1	chr2:219526168-219526582	ENSG00000074582	BCS1L	BC1 (ubiquinol-cytochrome c reductase) synthesis-like	ci	NA	0.89	0.83	0.93	0.9	-0.04	-0.07	-0.01	-0.1
ci@2:219561324:219561762:+|2:219561324:219561325:+.1	chr2:219561224-219561862	ENSG00000163482	STK36	serine/threonine kinase 36	ci	NA	0.37	0.35	0.48	0.64	-0.11	-0.29	-0.27	-0.13
ci@2:220023084:220026827:-|2:220026826:220026827:-.1	chr2:220022984-220026927	ENSG00000213901	SLC23A3	solute carrier family 23 (nucleobase transporters), member 3	ci	NA	0.15	0	0.13	0.19	0.02	-0.19	-0.04	-0.13
ci@2:220078908:220079111:-|2:220079110:220079111:-.1	chr2:220078808-220079211	ENSG00000198925	ATG9A	autophagy related 9A	ci	NA	0.75	0.68	0.5	0.75	0.25	-0.07	0	0.18
ci@2:220079220:220079683:-|2:220079682:220079683:-.1	chr2:220079120-220079783	ENSG00000198925	ATG9A	autophagy related 9A	ci	NA	0.6	0.75	0.59	0.84	0.01	-0.09	-0.24	0.16
ci@2:220099010:220099548:+|2:220099010:220099011:+.1	chr2:220098910-220099648	ENSG00000163516	ANKZF1	ankyrin repeat and zinc finger domain containing 1	ci	NA	0.61	0.57	0.69	0.7	-0.08	-0.13	-0.09	-0.12
ci@2:220100307:220100430:+|2:220100307:220100308:+.1	chr2:220100207-220100530	ENSG00000163516	ANKZF1	ankyrin repeat and zinc finger domain containing 1	ci	NA	0.58	0.59	0.72	0.69	-0.14	-0.1	-0.11	-0.13
ci@2:220431848:220431995:-|2:220431994:220431995:-.1	chr2:220431748-220432095	ENSG00000124006	OBSL1	obscurin-like 1	ci	NA	0.89	0.81	0.94	0.93	-0.05	-0.12	-0.04	-0.13
ci@2:234198620:234198894:+|2:234198620:234198621:+.1	chr2:234198520-234198994	ENSG00000085978	ATG16L1	autophagy related 16-like 1 (S. cerevisiae)	ci	NA	0.69	0.73	0.87	0.73	-0.18	0	-0.04	-0.14
ci@2:234355442:234356733:+|2:234355442:234355443:+.1	chr2:234355342-234356833	ENSG00000077044	DGKD	diacylglycerol kinase, delta 130kDa	ci	NA	0.68	0.69	0.75	0.85	-0.07	-0.16	-0.17	-0.06
ci@2:234377199:234378017:+|2:234377199:234377200:+.1	chr2:234377099-234378117	ENSG00000077044	DGKD	diacylglycerol kinase, delta 130kDa	ci	NA	0.99	0.87	0.85	0.94	0.14	-0.07	0.05	0.02
ci@2:234433208:234434124:-|2:234434123:234434124:-.1	chr2:234433108-234434224	ENSG00000085982	USP40	ubiquitin specific peptidase 40	ci	NA	0.83	0.82	0.86	0.94	-0.03	-0.12	-0.11	-0.04
ci@2:234460165:234463026:-|2:234463025:234463026:-.1	chr2:234460065-234463126	ENSG00000085982	USP40	ubiquitin specific peptidase 40	ci	NA	0.82	0.87	0.94	0.95	-0.12	-0.08	-0.13	-0.07
ci@2:239003163:239005442:+|2:239003163:239003164:+.1	chr2:239003063-239005542	ENSG00000132330	SCLY	selenocysteine lyase	ci	NA	0.82	0.77	0.63	0.78	0.19	-0.01	0.04	0.14
ci@2:241421678:241439375:-|2:241439374:241439375:-.1	chr2:241421578-241439475	ENSG00000144504	ANKMY1	ankyrin repeat and MYND domain containing 1	ci	NA	0.64	0.88	0.88	0.9	-0.24	-0.02	-0.26	0
ci@2:242027817:242031053:+|2:242027817:242027818:+.1	chr2:242027717-242031153	ENSG00000162804	SNED1	sushi, nidogen and EGF-like domains 1	ci	NA	0.18	0.1	0	0.13	0.18	-0.03	0.05	0.1
ci@2:242047715:242051655:-|2:242051654:242051655:-.1	chr2:242047615-242051755	ENSG00000115687	PASK	PAS domain containing serine/threonine kinase	ci	NA	0.81	0.55	0.64	0.36	0.17	0.19	0.45	-0.09
ci@2:242380971:242396162:+|2:242380971:242380972:+.1	chr2:242380871-242396262	ENSG00000006607	FARP2	FERM, RhoGEF and pleckstrin domain protein 2	ci	NA	0.28	0.22	0.55	0.23	-0.27	-0.01	0.05	-0.33
ci@2:242608100:242610141:+|2:242608100:242608101:+.1	chr2:242608000-242610241	ENSG00000168397	ATG4B	autophagy related 4B, cysteine peptidase	ci	NA	0.83	0.74	0.93	0.87	-0.1	-0.13	-0.04	-0.19
ci@2:24345417:24345988:-|2:24345987:24345988:-.1	chr2:24345317-24346088	ENSG00000176732	PFN4	profilin family, member 4	ci	NA	0.39	0.34	0.7	0.63	-0.31	-0.29	-0.24	-0.36
ci@2:24346403:24347200:+|2:24346403:24346404:+.1	chr2:24346303-24347300	ENSG00000219626	FAM228B	family with sequence similarity 228, member B	ci	NA	0.33	0.46	0.76	0.5	-0.43	-0.04	-0.17	-0.3
ci@2:24428166:24431106:-|2:24431105:24431106:-.1	chr2:24428066-24431206	ENSG00000198399	ITSN2	intersectin 2	ci	NA	0.88	0.94	0.99	0.97	-0.11	-0.03	-0.09	-0.05
ci@2:25042983:25043593:-|2:25043592:25043593:-.1	chr2:25042883-25043693	ENSG00000138031	ADCY3	adenylate cyclase 3	ci	NA	0.65	0.58	0.69	0.7	-0.04	-0.12	-0.05	-0.11
ci@2:25470618:25470906:-|2:25470905:25470906:-.1	chr2:25470518-25471006	ENSG00000119772	DNMT3A	DNA (cytosine-5-)-methyltransferase 3 alpha	ci	NA	0.77	0.79	0.93	0.85	-0.16	-0.06	-0.08	-0.14
ci@2:27279006:27279491:+|2:27279006:27279007:+.1	chr2:27278906-27279591	ENSG00000084693	AGBL5	ATP/GTP binding protein-like 5	ci	NA	0.81	0.87	0.97	0.92	-0.16	-0.05	-0.11	-0.1
ci@2:27292574:27292960:+|2:27292574:27292575:+.1	chr2:27292474-27293060	ENSG00000084693	AGBL5	ATP/GTP binding protein-like 5	ci	NA	0.53	0.69	0.88	0.59	-0.35	0.1	-0.06	-0.19
ci@2:27456404:27456494:+|2:27456404:27456405:+.1	chr2:27456304-27456594	ENSG00000084774	CAD	carbamoyl-phosphate synthetase 2, aspartate transcarbamylase, and dihydroorotase	ci	NA	0.85	0.95	0.92	0.96	-0.07	-0.01	-0.11	0.03
ci@2:27530776:27531028:-|2:27531027:27531028:-.1	chr2:27530676-27531128	ENSG00000163794	UCN	urocortin	ci	NA	0.72	0.79	0.6	0.4	0.12	0.39	0.32	0.19
ci@2:27590068:27590324:-|2:27590323:27590324:-.1	chr2:27589968-27590424	ENSG00000115211	EIF2B4	eukaryotic translation initiation factor 2B, subunit 4 delta, 67kDa	ci	NA	0.81	0.77	0.88	0.93	-0.07	-0.16	-0.12	-0.11
ci@2:27667388:27667881:-|2:27667880:27667881:-.1	chr2:27667288-27667981	ENSG00000138002	IFT172	intraflagellar transport 172 homolog (Chlamydomonas)	ci	NA	0.78	0.86	0.93	0.78	-0.15	0.08	0	-0.07
ci@2:27667972:27668163:-|2:27668162:27668163:-.1	chr2:27667872-27668263	ENSG00000138002	IFT172	intraflagellar transport 172 homolog (Chlamydomonas)	ci	NA	0.88	0.82	0.97	0.89	-0.09	-0.07	-0.01	-0.15
ci@2:27672429:27672558:-|2:27672557:27672558:-.1	chr2:27672329-27672658	ENSG00000138002	IFT172	intraflagellar transport 172 homolog (Chlamydomonas)	ci	NA	0.86	0.74	0.94	0.96	-0.08	-0.22	-0.1	-0.2
ci@2:29073271:29073938:-|2:29073937:29073938:-.1	chr2:29073171-29074038	ENSG00000171103	TRMT61B	tRNA methyltransferase 61 homolog B (S. cerevisiae)	ci	NA	0.94	0.82	0.92	0.96	0.02	-0.14	-0.02	-0.1
ci@2:29087985:29092445:-|2:29092444:29092445:-.1	chr2:29087885-29092545	ENSG00000171103	TRMT61B	tRNA methyltransferase 61 homolog B (S. cerevisiae)	ci	NA	0.89	0.75	0.91	0.88	-0.02	-0.13	0.01	-0.16
ci@2:32582554:32602656:+|2:32582554:32582555:+.1	chr2:32582454-32602756	ENSG00000115760	BIRC6	baculoviral IAP repeat containing 6	ci	NA	0.82	0.82	0.55	0.67	0.27	0.15	0.15	0.27
ci@2:32696192:32698180:+|2:32696192:32696193:+.1	chr2:32696092-32698280	ENSG00000115760	BIRC6	baculoviral IAP repeat containing 6	ci	NA	0.16	0.2	0.09	0.06	0.07	0.14	0.1	0.11
ci@2:42936236:42946128:+|2:42936236:42936237:+.1	chr2:42936136-42946228	ENSG00000057935	MTA3	metastasis associated 1 family, member 3	ci	NA	0.4	0.34	0.26	0.4	0.14	-0.06	0	0.08
ci@2:42950175:42980514:+|2:42950175:42950176:+.1	chr2:42950075-42980614	ENSG00000057935	MTA3	metastasis associated 1 family, member 3	ci	NA	0.92	0.86	0.88	0.76	0.04	0.1	0.16	-0.02
ci@2:54342893:54362590:+|2:54342893:54342894:+.1	chr2:54342793-54362690	ENSG00000170634	ACYP2	acylphosphatase 2, muscle type	ci	NA	0.36	0.5	0.16	0.3	0.2	0.2	0.06	0.34
ci@2:55518911:55522733:-|2:55522732:55522733:-.1	chr2:55518811-55522833	ENSG00000115355	CCDC88A	coiled-coil domain containing 88A	ci	NA	0.62	0.55	0.88	0.66	-0.26	-0.11	-0.04	-0.33
ci@2:58388773:58390001:-|2:58390000:58390001:-.1	chr2:58388673-58390101	ENSG00000115392	FANCL	Fanconi anemia, complementation group L	ci	NA	0.81	0.85	0.73	0.77	0.08	0.08	0.04	0.12
ci@2:58390082:58390164:-|2:58390163:58390164:-.1	chr2:58389982-58390264	ENSG00000115392	FANCL	Fanconi anemia, complementation group L	ci	NA	0.8	0.84	0.72	0.8	0.08	0.04	0	0.12
ci@2:70451761:70454867:-|2:70454866:70454867:-.1	chr2:70451661-70454967	ENSG00000116001	TIA1	TIA1 cytotoxic granule-associated RNA binding protein	ci	NA	0.4	0.52	0.64	0.57	-0.24	-0.05	-0.17	-0.12
ci@2:71298957:71299771:+|2:71298957:71298958:+.1	chr2:71298857-71299871	ENSG00000124357	NAGK	N-acetylglucosamine kinase	ci	NA	0.83	0.93	0.92	0.94	-0.09	-0.01	-0.11	0.01
ci@2:71302772:71303734:+|2:71302772:71302773:+.1	chr2:71302672-71303834	ENSG00000124357	NAGK	N-acetylglucosamine kinase	ci	NA	0.81	0.84	0.92	0.94	-0.11	-0.1	-0.13	-0.08
ci@2:71351673:71357310:-|2:71357309:71357310:-.1	chr2:71351573-71357410	ENSG00000124370	MCEE	methylmalonyl CoA epimerase	ci	NA	0.69	0.66	0.8	0.87	-0.11	-0.21	-0.18	-0.14
ci@2:71615853:71620524:+|2:71615853:71615854:+.1	chr2:71615753-71620624	ENSG00000075292	ZNF638	zinc finger protein 638	ci	NA	0.8	0.8	0.97	0.89	-0.17	-0.09	-0.09	-0.17
ci@2:74717866:74718255:+|2:74717866:74717867:+.1	chr2:74717766-74718355	ENSG00000115282	TTC31	tetratricopeptide repeat domain 31	ci	NA	0.8	0.86	0.93	0.9	-0.13	-0.04	-0.1	-0.07
ci@2:74732317:74732466:-|2:74732465:74732466:-.1	chr2:74732217-74732566	ENSG00000115289	PCGF1	polycomb group ring finger 1	ci	NA	0.61	0.57	0.74	0.73	-0.13	-0.16	-0.12	-0.17
ci@2:75891909:75893055:-|2:75893054:75893055:-.1	chr2:75891809-75893155	ENSG00000005436	GCFC2	GC-rich sequence DNA-binding factor 2	ci	NA	0.82	0.93	0.96	0.91	-0.14	0.02	-0.09	-0.03
ci@2:75928413:75929325:-|2:75929324:75929325:-.1	chr2:75928313-75929425	ENSG00000005436	GCFC2	GC-rich sequence DNA-binding factor 2	ci	NA	0.88	0.8	0.9	0.91	-0.02	-0.11	-0.03	-0.1
ci@2:85770157:85770793:+|2:85770157:85770158:+.1	chr2:85770057-85770893	ENSG00000168906	MAT2A	methionine adenosyltransferase II, alpha	ci	NA	0.45	0.45	0.45	0.59	0	-0.14	-0.14	0
ci@2:87258030:87258939:-|2:87258938:87258939:-.1	chr2:87257930-87259039	ENSG00000231259	AC125232.1	NA	ci	NA	0.66	0.74	0.91	0.86	-0.25	-0.12	-0.2	-0.17
ci@2:9002852:9004300:-|2:9004299:9004300:-.1	chr2:9002752-9004400	ENSG00000143797	MBOAT2	membrane bound O-acyltransferase domain containing 2	ci	NA	0.82	0.89	0.99	0.97	-0.17	-0.08	-0.15	-0.1
ci@2:95942405:95942720:+|2:95942405:95942406:+.1	chr2:95942305-95942820	ENSG00000155066	PROM2	prominin 2	ci	NA	0.91	0.88	0.94	0.99	-0.03	-0.11	-0.08	-0.06
ci@2:95945745:95946990:+|2:95945745:95945746:+.1	chr2:95945645-95947090	ENSG00000155066	PROM2	prominin 2	ci	NA	0.84	0.87	0.95	0.96	-0.11	-0.09	-0.12	-0.08
ci@2:96072905:96076275:+|2:96072905:96072906:+.1	chr2:96072805-96076375	ENSG00000115042	FAHD2A	fumarylacetoacetate hydrolase domain containing 2A	ci	NA	0.82	0.83	0.94	0.88	-0.12	-0.05	-0.06	-0.11
ci@2:96076334:96076612:+|2:96076334:96076335:+.1	chr2:96076234-96076712	ENSG00000115042	FAHD2A	fumarylacetoacetate hydrolase domain containing 2A	ci	NA	0.81	0.79	0.88	0.91	-0.07	-0.12	-0.1	-0.09
ci@2:96078290:96078425:+|2:96078290:96078291:+.1	chr2:96078190-96078525	ENSG00000115042	FAHD2A	fumarylacetoacetate hydrolase domain containing 2A	ci	NA	0.71	0.84	0.85	0.82	-0.14	0.02	-0.11	-0.01
ci@2:96078512:96078643:+|2:96078512:96078513:+.1	chr2:96078412-96078743	ENSG00000115042	FAHD2A	fumarylacetoacetate hydrolase domain containing 2A	ci	NA	0.65	0.86	0.91	0.86	-0.26	0	-0.21	-0.05
ci@2:96686981:96687116:+|2:96686981:96686982:+.1	chr2:96686881-96687216	ENSG00000231584	FAHD2CP	NA	ci	NA	0.84	0.9	0.98	0.97	-0.14	-0.07	-0.13	-0.08
ci@2:97527631:97529419:-|2:97529418:97529419:-.1	chr2:97527531-97529519	ENSG00000168758	SEMA4C	sema domain, immunoglobulin domain (Ig), transmembrane domain (TM) and short cytoplasmic domain, (semaphorin) 4C	ci	NA	0.91	0.8	0.9	0.97	0.01	-0.17	-0.06	-0.1
ci@2:97532168:97533515:-|2:97533514:97533515:-.1	chr2:97532068-97533615	ENSG00000168758	SEMA4C	sema domain, immunoglobulin domain (Ig), transmembrane domain (TM) and short cytoplasmic domain, (semaphorin) 4C	ci	NA	0.79	0.75	0.85	0.92	-0.06	-0.17	-0.13	-0.1
ci@2:97751598:97751876:-|2:97751875:97751876:-.1	chr2:97751498-97751976	ENSG00000144199	FAHD2B	fumarylacetoacetate hydrolase domain containing 2B	ci	NA	0.82	0.74	0.83	0.89	-0.01	-0.15	-0.07	-0.09
ci@2:98088252:98088548:-|2:98088547:98088548:-.1	chr2:98088152-98088648	ENSG00000230606	AC159540.1	NA	ci	NA	0.46	0.39	0.64	0.52	-0.18	-0.13	-0.06	-0.25
ci@2:99785933:99786013:-|2:99786012:99786013:-.1	chr2:99785833-99786113	ENSG00000158411	MITD1	MIT, microtubule interacting and transport, domain containing 1	ci	NA	0.62	0.59	0.78	0.76	-0.16	-0.17	-0.14	-0.19
ci@20:21224926:21227117:+|20:21224926:21224927:+.1	chr20:21224826-21227217	ENSG00000088970	PLK1S1	NA	ci	NA	0.67	0.5	0.71	0.9	-0.04	-0.4	-0.23	-0.21
ci@20:256727:257434:-|20:257433:257434:-.1	chr20:256627-257534	ENSG00000196476	C20orf96	chromosome 20 open reading frame 96	ci	NA	0.38	0.45	0.54	0.49	-0.16	-0.04	-0.11	-0.09
ci@20:2816960:2818878:-|20:2818877:2818878:-.1	chr20:2816860-2818978	ENSG00000132635	PCED1A	PC-esterase domain containing 1A	ci	NA	0.74	0.77	0.88	0.88	-0.14	-0.11	-0.14	-0.11
ci@20:31041564:31043921:-|20:31043920:31043921:-.1	chr20:31041464-31044021	ENSG00000197183	C20orf112	chromosome 20 open reading frame 112	ci	NA	0.69	0.72	0.95	0.91	-0.26	-0.19	-0.22	-0.23
ci@20:32247356:32247459:-|20:32247458:32247459:-.1	chr20:32247256-32247559	ENSG00000125967	NECAB3	N-terminal EF-hand calcium binding protein 3	ci	NA	0.85	0.72	0.82	0.69	0.03	0.03	0.16	-0.1
ci@20:33442726:33444609:-|20:33444608:33444609:-.1	chr20:33442626-33444709	ENSG00000131067	GGT7	gamma-glutamyltransferase 7	ci	NA	0.75	0.84	0.87	0.89	-0.12	-0.05	-0.14	-0.03
ci@20:33447845:33448057:-|20:33448056:33448057:-.1	chr20:33447745-33448157	ENSG00000131067	GGT7	gamma-glutamyltransferase 7	ci	NA	0.77	0.88	0.84	0.92	-0.07	-0.04	-0.15	0.04
ci@20:33448124:33449248:-|20:33449247:33449248:-.1	chr20:33448024-33449348	ENSG00000131067	GGT7	gamma-glutamyltransferase 7	ci	NA	0.62	0.55	0.76	0.87	-0.14	-0.32	-0.25	-0.21
ci@20:33851755:33855008:+|20:33851755:33851756:+.1	chr20:33851655-33855108	ENSG00000125966	MMP24	matrix metallopeptidase 24 (membrane-inserted)	ci	NA	0.98	0.96	0.88	0.87	0.1	0.09	0.11	0.08
ci@20:33859948:33865849:-|20:33865848:33865849:-.1	chr20:33859848-33865949	ENSG00000088298	EDEM2	ER degradation enhancer, mannosidase alpha-like 2	ci	NA	0.02	0.03	0.13	0.1	-0.11	-0.07	-0.08	-0.1
ci@20:34148131:34148307:-|20:34148306:34148307:-.1	chr20:34148031-34148407	ENSG00000088340	FER1L4	NA	ci	NA	0.83	0.79	0.7	0.73	0.13	0.06	0.1	0.09
ci@20:34194328:34195023:-|20:34195022:34195023:-.1	chr20:34194228-34195123	ENSG00000088340	FER1L4	NA	ci	NA	0.46	0.44	0.75	0.67	-0.29	-0.23	-0.21	-0.31
ci@20:34195078:34195337:-|20:34195336:34195337:-.1	chr20:34194978-34195437	ENSG00000088340	FER1L4	NA	ci	NA	0.45	0.33	0.72	0.42	-0.27	-0.09	0.03	-0.39
ci@20:34205162:34205442:+|20:34205162:34205163:+.1	chr20:34205062-34205542	ENSG00000061656	SPAG4	sperm associated antigen 4	ci	NA	0.48	0.41	0.82	0.7	-0.34	-0.29	-0.22	-0.41
ci@20:34205508:34205701:+|20:34205508:34205509:+.1	chr20:34205408-34205801	ENSG00000061656	SPAG4	sperm associated antigen 4	ci	NA	0.36	0.31	0.74	0.43	-0.38	-0.12	-0.07	-0.43
ci@20:34205762:34206009:+|20:34205762:34205763:+.1	chr20:34205662-34206109	ENSG00000061656	SPAG4	sperm associated antigen 4	ci	NA	0.41	0.39	0.73	0.53	-0.32	-0.14	-0.12	-0.34
ci@20:34206052:34206372:+|20:34206052:34206053:+.1	chr20:34205952-34206472	ENSG00000061656	SPAG4	sperm associated antigen 4	ci	NA	0.43	0.33	0.65	0.6	-0.22	-0.27	-0.17	-0.32
ci@20:34206397:34206534:+|20:34206397:34206398:+.1	chr20:34206297-34206634	ENSG00000061656	SPAG4	sperm associated antigen 4	ci	NA	0.5	0.36	0.56	0.68	-0.06	-0.32	-0.18	-0.2
ci@20:34206920:34207117:+|20:34206920:34206921:+.1	chr20:34206820-34207217	ENSG00000061656	SPAG4	sperm associated antigen 4	ci	NA	0.59	0.64	0.79	0.71	-0.2	-0.07	-0.12	-0.15
ci@20:37153588:37154047:+|20:37153588:37153589:+.1	chr20:37153488-37154147	ENSG00000170471	RALGAPB	Ral GTPase activating protein, beta subunit (non-catalytic)	ci	NA	0.8	0.76	0.99	0.99	-0.19	-0.23	-0.19	-0.23
ci@20:39985828:39986001:+|20:39985828:39985829:+.1	chr20:39985728-39986101	ENSG00000132793	LPIN3	lipin 3	ci	NA	0.43	0.41	0.54	0.63	-0.11	-0.22	-0.2	-0.13
ci@20:48928551:48928889:+|20:48928551:48928552:+.1	chr20:48928451-48928989	ENSG00000203999	RP11-290F20.1	NA	ci	NA	0.22	0.2	0.15	0.47	0.07	-0.27	-0.25	0.05
ci@20:60740570:60747738:+|20:60740570:60740571:+.1	chr20:60740470-60747838	ENSG00000184402	SS18L1	synovial sarcoma translocation gene on chromosome 18-like 1	ci	NA	0.86	0.91	0.9	0.98	-0.04	-0.07	-0.12	0.01
ci@20:60899610:60900372:-|20:60900371:60900372:-.1	chr20:60899510-60900472	ENSG00000130702	LAMA5	laminin, alpha 5	ci	NA	0.85	0.83	0.68	0.88	0.17	-0.05	-0.03	0.15
ci@20:61296440:61297732:+|20:61296440:61296441:+.1	chr20:61296340-61297832	ENSG00000101187	SLCO4A1	solute carrier organic anion transporter family, member 4A1	ci	NA	0.84	1	0.99	0.93	-0.15	0.07	-0.09	0.01
ci@20:61300430:61303102:+|20:61300430:61300431:+.1	chr20:61300330-61303202	ENSG00000101187	SLCO4A1	solute carrier organic anion transporter family, member 4A1	ci	NA	0.9	0.81	0.96	0.94	-0.06	-0.13	-0.04	-0.15
ci@20:62161584:62162099:-|20:62162098:62162099:-.1	chr20:62161484-62162199	ENSG00000101213	PTK6	PTK6 protein tyrosine kinase 6	ci	NA	0.9	0.88	0.99	0.92	-0.09	-0.04	-0.02	-0.11
ci@20:62572561:62575006:-|20:62575005:62575006:-.1	chr20:62572461-62575106	ENSG00000198276	UCKL1	uridine-cytidine kinase 1-like 1	ci	NA	0.78	0.68	0.88	0.92	-0.1	-0.24	-0.14	-0.2
ci@20:62599305:62601167:-|20:62601166:62601167:-.1	chr20:62599205-62601267	ENSG00000196700	ZNF512B	zinc finger protein 512B	ci	NA	0.64	0.77	1	0.82	-0.36	-0.05	-0.18	-0.23
ci@20:62701174:62701613:+|20:62701174:62701175:+.1	chr20:62701074-62701713	ENSG00000171703	TCEA2	transcription elongation factor A (SII), 2	ci	NA	0.83	0.79	0.93	0.97	-0.1	-0.18	-0.14	-0.14
ci@20:741882:742345:-|20:742344:742345:-.1	chr20:741782-742445	ENSG00000101276	SLC52A3	solute carrier family 52, riboflavin transporter, member 3	ci	NA	0.61	0.46	0.75	0.73	-0.14	-0.27	-0.12	-0.29
ci@20:742468:744142:-|20:744141:744142:-.1	chr20:742368-744242	ENSG00000101276	SLC52A3	solute carrier family 52, riboflavin transporter, member 3	ci	NA	0.67	0.74	0.83	0.92	-0.16	-0.18	-0.25	-0.09
ci@21:34127664:34131391:-|21:34131390:34131391:-.1	chr21:34127564-34131491	ENSG00000159086	PAXBP1	PAX3 and PAX7 binding protein 1	ci	NA	0.42	0.38	0.75	0.67	-0.33	-0.29	-0.25	-0.37
ci@21:34131580:34132088:-|21:34132087:34132088:-.1	chr21:34131480-34132188	ENSG00000159086	PAXBP1	PAX3 and PAX7 binding protein 1	ci	NA	0.55	0.56	0.62	0.71	-0.07	-0.15	-0.16	-0.06
ci@21:34954361:34954471:-|21:34954470:34954471:-.1	chr21:34954261-34954571	ENSG00000159147	DONSON	downstream neighbor of SON	ci	NA	0.77	0.78	0.93	0.91	-0.16	-0.13	-0.14	-0.15
ci@21:35446045:35467162:+|21:35446045:35446046:+.1	chr21:35445945-35467262	ENSG00000198743	SLC5A3	solute carrier family 5 (sodium/myo-inositol cotransporter), member 3	ci	NA	0.87	0.84	0.53	0.82	0.34	0.02	0.05	0.31
ci@21:37408549:37410448:-|21:37410447:37410448:-.1	chr21:37408449-37410548	ENSG00000185917	SETD4	SET domain containing 4	ci	NA	0.83	0.74	0.93	0.93	-0.1	-0.19	-0.1	-0.19
ci@21:37518653:37528515:-|21:37528514:37528515:-.1	chr21:37518553-37528615	ENSG00000236830	CBR3-AS1	NA	ci	NA	0.77	0.95	0.98	0.95	-0.21	0	-0.18	-0.03
ci@21:40668289:40670358:-|21:40670357:40670358:-.1	chr21:40668189-40670458	ENSG00000185658	BRWD1	bromodomain and WD repeat domain containing 1	ci	NA	0.21	0.19	0.05	0.19	0.16	0	0.02	0.14
ci@21:43327893:43329568:-|21:43329567:43329568:-.1	chr21:43327793-43329668	ENSG00000157617	C2CD2	C2 calcium-dependent domain containing 2	ci	NA	0.95	0.94	0.71	0.92	0.24	0.02	0.03	0.23
ci@21:43411998:43412602:-|21:43412601:43412602:-.1	chr21:43411898-43412702	ENSG00000173276	ZBTB21	zinc finger and BTB domain containing 21	ci	NA	0.2	0.19	0.5	0.4	-0.3	-0.21	-0.2	-0.31
ci@21:44263391:44270151:-|21:44270150:44270151:-.1	chr21:44263291-44270251	ENSG00000160193	WDR4	WD repeat domain 4	ci	NA	0.21	0.14	0.4	0.42	-0.19	-0.28	-0.21	-0.26
ci@21:47687056:47690315:-|21:47690314:47690315:-.1	chr21:47686956-47690415	ENSG00000160294	MCM3AP	minichromosome maintenance complex component 3 associated protein	ci	NA	0.76	0.77	0.88	0.86	-0.12	-0.09	-0.1	-0.11
ci@21:47690477:47692475:-|21:47692474:47692475:-.1	chr21:47690377-47692575	ENSG00000160294	MCM3AP	minichromosome maintenance complex component 3 associated protein	ci	NA	0.93	0.86	0.99	0.97	-0.06	-0.11	-0.04	-0.13
ci@21:47862486:47863723:+|21:47862486:47862487:+.1	chr21:47862386-47863823	ENSG00000160299	PCNT	pericentrin	ci	NA	0.82	0.89	0.94	0.88	-0.12	0.01	-0.06	-0.05
ci@21:47980696:47981661:+|21:47980696:47980697:+.1	chr21:47980596-47981761	ENSG00000160305	DIP2A	DIP2 disco-interacting protein 2 homolog A (Drosophila)	ci	NA	0.78	0.71	0.95	0.87	-0.17	-0.16	-0.09	-0.24
ci@21:47981718:47983771:+|21:47981718:47981719:+.1	chr21:47981618-47983871	ENSG00000160305	DIP2A	DIP2 disco-interacting protein 2 homolog A (Drosophila)	ci	NA	0.82	0.77	0.91	0.89	-0.09	-0.12	-0.07	-0.14
ci@22:18894238:18897685:+|22:18894238:18894239:+.1	chr22:18894138-18897785	ENSG00000183628	DGCR6	DiGeorge syndrome critical region gene 6	ci	NA	0.8	0.77	0.92	0.93	-0.12	-0.16	-0.13	-0.15
ci@22:18897785:18898401:+|22:18897785:18897786:+.1	chr22:18897685-18898501	ENSG00000183628	DGCR6	DiGeorge syndrome critical region gene 6	ci	NA	0.86	0.78	0.89	0.96	-0.03	-0.18	-0.1	-0.11
ci@22:18898541:18899053:+|22:18898541:18898542:+.1	chr22:18898441-18899153	ENSG00000183628	DGCR6	DiGeorge syndrome critical region gene 6	ci	NA	0.89	0.88	0.99	1	-0.1	-0.12	-0.11	-0.11
ci@22:18907311:18908855:-|22:18908854:18908855:-.1	chr22:18907211-18908955	ENSG00000100033	PRODH	proline dehydrogenase (oxidase) 1	ci	NA	0.86	0.89	0.73	0.68	0.13	0.21	0.18	0.16
ci@22:18908936:18909838:-|22:18909837:18909838:-.1	chr22:18908836-18909938	ENSG00000100033	PRODH	proline dehydrogenase (oxidase) 1	ci	NA	0.8	0.8	0.72	0.67	0.08	0.13	0.13	0.08
ci@22:18912713:18913201:-|22:18913200:18913201:-.1	chr22:18912613-18913301	ENSG00000100033	PRODH	proline dehydrogenase (oxidase) 1	ci	NA	0.91	0.89	0.9	1	0.01	-0.11	-0.09	-0.01
ci@22:19502571:19504050:+|22:19502571:19502572:+.1	chr22:19502471-19504150	ENSG00000093009	CDC45	cell division cycle 45	ci	NA	0.91	0.82	0.97	0.92	-0.06	-0.1	-0.01	-0.15
ci@22:19840009:19841966:-|22:19841965:19841966:-.1	chr22:19839909-19842066	ENSG00000215012	C22orf29	chromosome 22 open reading frame 29	ci	NA	0.88	0.95	0.96	1	-0.08	-0.05	-0.12	-0.01
ci@22:20102602:20102789:-|22:20102788:20102789:-.1	chr22:20102502-20102889	ENSG00000099899	TRMT2A	tRNA methyltransferase 2 homolog A (S. cerevisiae)	ci	NA	0.6	0.66	0.72	0.72	-0.12	-0.06	-0.12	-0.06
ci@22:20102970:20103195:-|22:20103194:20103195:-.1	chr22:20102870-20103295	ENSG00000099899	TRMT2A	tRNA methyltransferase 2 homolog A (S. cerevisiae)	ci	NA	0.71	0.64	0.72	0.78	-0.01	-0.14	-0.07	-0.08
ci@22:20104495:20104620:-|22:20104619:20104620:-.1	chr22:20104395-20104720	ENSG00000099899	TRMT2A	tRNA methyltransferase 2 homolog A (S. cerevisiae)	ci	NA	0.29	0.63	0.21	0.28	0.08	0.35	0.01	0.42
ci@22:20127415:20127638:+|22:20127415:20127416:+.1	chr22:20127315-20127738	ENSG00000099904	ZDHHC8	zinc finger, DHHC-type containing 8	ci	NA	0.51	0.41	0.61	0.5	-0.1	-0.09	0.01	-0.2
ci@22:20843531:20850047:-|22:20850046:20850047:-.1	chr22:20843431-20850147	ENSG00000099910	KLHL22	kelch-like family member 22	ci	NA	0.92	1	0.71	0.87	0.21	0.13	0.05	0.29
ci@22:21311774:21318679:+|22:21311774:21311775:+.1	chr22:21311674-21318779	ENSG00000237476	XXbac-B135H6.15	NA	ci	NA	0.41	0.35	0.62	0.54	-0.21	-0.19	-0.13	-0.27
ci@22:22024251:22024855:+|22:22024251:22024252:+.1	chr22:22024151-22024955	ENSG00000100023	PPIL2	peptidylprolyl isomerase (cyclophilin)-like 2	ci	NA	0.82	0.86	0.96	0.94	-0.14	-0.08	-0.12	-0.1
ci@22:24032543:24036306:-|22:24036305:24036306:-.1	chr22:24032443-24036406	ENSG00000228315	GUSBP11	NA	ci	NA	0.28	0.19	0.51	0.33	-0.23	-0.14	-0.05	-0.32
ci@22:24180963:24181082:-|22:24181081:24181082:-.1	chr22:24180863-24181182	ENSG00000099958	DERL3	derlin 3	ci	NA	0.89	0.9	0.83	0.76	0.06	0.14	0.13	0.07
ci@22:26888334:26890105:-|22:26890104:26890105:-.1	chr22:26888234-26890205	ENSG00000100109	TFIP11	tuftelin interacting protein 11	ci	NA	0.84	0.75	0.91	0.83	-0.07	-0.08	0.01	-0.16
ci@22:28318166:28320335:+|22:28318166:28318167:+.1	chr22:28318066-28320435	ENSG00000235954	TTC28-AS1	NA	ci	NA	0.62	0.4	0.85	0.74	-0.23	-0.34	-0.12	-0.45
ci@22:29660207:29661468:-|22:29661467:29661468:-.1	chr22:29660107-29661568	ENSG00000100263	RHBDD3	rhomboid domain containing 3	ci	NA	0.45	0.71	0.43	0.46	0.02	0.25	-0.01	0.28
ci@22:32009841:32010775:+|22:32009841:32009842:+.1	chr22:32009741-32010875	ENSG00000198089	SFI1	Sfi1 homolog, spindle assembly associated (yeast)	ci	NA	0.8	0.83	0.65	0.85	0.15	-0.02	-0.05	0.18
ci@22:32179971:32180800:+|22:32179971:32179972:+.1	chr22:32179871-32180900	ENSG00000100150	DEPDC5	DEP domain containing 5	ci	NA	0.91	0.93	1	0.64	-0.09	0.29	0.27	-0.07
ci@22:37154453:37158948:-|22:37158947:37158948:-.1	chr22:37154353-37159048	ENSG00000100360	IFT27	intraflagellar transport 27 homolog (Chlamydomonas)	ci	NA	0.69	0.73	0.95	0.89	-0.26	-0.16	-0.2	-0.22
ci@22:37159057:37159963:-|22:37159962:37159963:-.1	chr22:37158957-37160063	ENSG00000100360	IFT27	intraflagellar transport 27 homolog (Chlamydomonas)	ci	NA	0.65	0.64	0.91	0.85	-0.26	-0.21	-0.2	-0.27
ci@22:37576907:37578192:-|22:37578191:37578192:-.1	chr22:37576807-37578292	ENSG00000133466	C1QTNF6	C1q and tumor necrosis factor related protein 6	ci	NA	0.44	0.33	0.54	0.35	-0.1	-0.02	0.09	-0.21
ci@22:38341180:38343288:-|22:38343287:38343288:-.1	chr22:38341080-38343388	ENSG00000128346	C22orf23	chromosome 22 open reading frame 23	ci	NA	0.24	0.03	0.13	0.36	0.11	-0.33	-0.12	-0.1
ci@22:40805022:40805254:+|22:40805022:40805023:+.1	chr22:40804922-40805354	ENSG00000100359	SGSM3	small G protein signaling modulator 3	ci	NA	0.52	0.43	0.57	0.66	-0.05	-0.23	-0.14	-0.14
ci@22:41613206:41615423:+|22:41613206:41613207:+.1	chr22:41613106-41615523	ENSG00000100395	L3MBTL2	l(3)mbt-like 2 (Drosophila)	ci	NA	0.97	0.89	0.76	0.94	0.21	-0.05	0.03	0.13
ci@22:45128271:45130907:+|22:45128271:45128272:+.1	chr22:45128171-45131007	ENSG00000241484	ARHGAP8	Rho GTPase activating protein 8	ci	NA	0.88	0.91	1	0.95	-0.12	-0.04	-0.07	-0.09
ci@22:46748227:46749664:+|22:46748227:46748228:+.1	chr22:46748127-46749764	ENSG00000100416	TRMU	tRNA 5-methylaminomethyl-2-thiouridylate methyltransferase	ci	NA	0.82	0.92	0.95	0.95	-0.13	-0.03	-0.13	-0.03
ci@22:50640019:50644746:+|22:50640019:50640020:+.1	chr22:50639919-50644846	ENSG00000073169	RP3-402G11.5	selenoprotein O	ci	NA	0.9	0.66	0.81	0.95	0.09	-0.29	-0.05	-0.15
ci@22:50647145:50648610:+|22:50647145:50647146:+.1	chr22:50647045-50648710	ENSG00000073169	RP3-402G11.5	selenoprotein O	ci	NA	0.83	0.87	0.95	0.89	-0.12	-0.02	-0.06	-0.08
ci@22:50684256:50684339:-|22:50684338:50684339:-.1	chr22:50684156-50684439	ENSG00000100429	HDAC10	histone deacetylase 10	ci	NA	0.69	0.76	0.83	0.87	-0.14	-0.11	-0.18	-0.07
ci@22:50686574:50686654:-|22:50686653:50686654:-.1	chr22:50686474-50686754	ENSG00000100429	HDAC10	histone deacetylase 10	ci	NA	0.77	0.84	0.94	0.94	-0.17	-0.1	-0.17	-0.1
ci@22:50687597:50687757:-|22:50687756:50687757:-.1	chr22:50687497-50687857	ENSG00000100429	HDAC10	histone deacetylase 10	ci	NA	0.81	0.85	0.95	0.93	-0.14	-0.08	-0.12	-0.1
ci@22:50691909:50693626:-|22:50693625:50693626:-.1	chr22:50691809-50693726	ENSG00000188130	MAPK12	mitogen-activated protein kinase 12	ci	NA	0.84	0.65	0.65	0.82	0.19	-0.17	0.02	0
ci@22:51012144:51012764:-|22:51012763:51012764:-.1	chr22:51012044-51012864	ENSG00000205560	CPT1B	carnitine palmitoyltransferase 1B (muscle)	ci	NA	0.89	0.84	0.66	0.85	0.23	-0.01	0.04	0.18
ci@3:101086855:101090852:-|3:101090851:101090852:-.1	chr3:101086755-101090952	ENSG00000138468	SENP7	SUMO1/sentrin specific peptidase 7	ci	NA	0.95	0.84	0.75	0.97	0.2	-0.13	-0.02	0.09
ci@3:101391057:101395449:-|3:101395448:101395449:-.1	chr3:101390957-101395549	ENSG00000066422	ZBTB11	zinc finger and BTB domain containing 11	ci	NA	0.73	0.7	0.32	0.62	0.41	0.08	0.11	0.38
ci@3:108409750:108412207:+|3:108409750:108409751:+.1	chr3:108409650-108412307	ENSG00000198919	DZIP3	DAZ interacting protein 3, zinc finger	ci	NA	0.79	0.81	0.96	0.92	-0.17	-0.11	-0.13	-0.15
ci@3:113673257:113675186:+|3:113673257:113673258:+.1	chr3:113673157-113675286	ENSG00000184307	ZDHHC23	zinc finger, DHHC-type containing 23	ci	NA	0.81	0.75	0.91	1	-0.1	-0.25	-0.19	-0.16
ci@3:113677385:113679567:+|3:113677385:113677386:+.1	chr3:113677285-113679667	ENSG00000184307	ZDHHC23	zinc finger, DHHC-type containing 23	ci	NA	0.14	0.23	0.25	0.44	-0.11	-0.21	-0.3	-0.02
ci@3:119153729:119155638:-|3:119155637:119155638:-.1	chr3:119153629-119155738	ENSG00000176142	TMEM39A	transmembrane protein 39A	ci	NA	0.89	0.85	0.97	0.88	-0.08	-0.03	0.01	-0.12
ci@3:119155825:119156602:-|3:119156601:119156602:-.1	chr3:119155725-119156702	ENSG00000176142	TMEM39A	transmembrane protein 39A	ci	NA	0.68	0.76	0.86	0.81	-0.18	-0.05	-0.13	-0.1
ci@3:119187953:119188667:+|3:119187953:119187954:+.1	chr3:119187853-119188767	ENSG00000163389	POGLUT1	protein O-glucosyltransferase 1	ci	NA	0.95	0.94	0.78	0.88	0.17	0.06	0.07	0.16
ci@3:121547819:121553238:-|3:121553237:121553238:-.1	chr3:121547719-121553338	ENSG00000173226	IQCB1	IQ motif containing B1	ci	NA	0.76	0.82	0.99	0.93	-0.23	-0.11	-0.17	-0.17
ci@3:122978436:122990369:+|3:122978436:122978437:+.1	chr3:122978336-122990469	ENSG00000121542	SEC22A	SEC22 vesicle trafficking protein homolog A (S. cerevisiae)	ci	NA	0.94	0.94	0.82	0.89	0.12	0.05	0.05	0.12
ci@3:123674962:123675202:-|3:123675201:123675202:-.1	chr3:123674862-123675302	ENSG00000175455	CCDC14	coiled-coil domain containing 14	ci	NA	0.38	0.37	0.58	0.49	-0.2	-0.12	-0.11	-0.21
ci@3:126178580:126180378:-|3:126180377:126180378:-.1	chr3:126178480-126180478	ENSG00000070476	ZXDC	ZXD family zinc finger C	ci	NA	0.49	0.48	0.68	0.61	-0.19	-0.13	-0.12	-0.2
ci@3:127396686:127398828:+|3:127396686:127396687:+.1	chr3:127396586-127398928	ENSG00000114626	ABTB1	ankyrin repeat and BTB (POZ) domain containing 1	ci	NA	0.44	0.46	0.7	0.71	-0.26	-0.25	-0.27	-0.24
ci@3:129156151:129156563:-|3:129156562:129156563:-.1	chr3:129156051-129156663	ENSG00000129071	MBD4	methyl-CpG binding domain protein 4	ci	NA	0.83	0.82	0.99	0.9	-0.16	-0.08	-0.07	-0.17
ci@3:129818201:129821607:-|3:129821606:129821607:-.1	chr3:129818101-129821707	ENSG00000253540	FAM86HP	NA	ci	NA	0.67	0.57	0.83	0.64	-0.16	-0.07	0.03	-0.26
ci@3:132297725:132298336:-|3:132298335:132298336:-.1	chr3:132297625-132298436	ENSG00000240303	ACAD11	acyl-CoA dehydrogenase family, member 11	ci	NA	0.77	0.75	0.59	0.45	0.18	0.3	0.32	0.16
ci@3:138213918:138216873:-|3:138216872:138216873:-.1	chr3:138213818-138216973	ENSG00000114107	CEP70	centrosomal protein 70kDa	ci	NA	0.75	0.9	0.77	0.96	-0.02	-0.06	-0.21	0.13
ci@3:138216952:138218952:-|3:138218951:138218952:-.1	chr3:138216852-138219052	ENSG00000114107	CEP70	centrosomal protein 70kDa	ci	NA	0.9	0.93	0.82	0.83	0.08	0.1	0.07	0.11
ci@3:142503882:142509861:+|3:142503882:142503883:+.1	chr3:142503782-142509961	ENSG00000144935	TRPC1	transient receptor potential cation channel, subfamily C, member 1	ci	NA	0.91	1	0.9	0.7	0.01	0.3	0.21	0.1
ci@3:14489324:14499458:+|3:14489324:14489325:+.1	chr3:14489224-14499558	ENSG00000131389	SLC6A6	solute carrier family 6 (neurotransmitter transporter, taurine), member 6	ci	NA	0.83	0.92	0.89	0.93	-0.06	-0.01	-0.1	0.03
ci@3:148749150:148749988:-|3:148749987:148749988:-.1	chr3:148749050-148750088	ENSG00000071794	HLTF	helicase-like transcription factor	ci	NA	0.23	0.1	0.39	0.24	-0.16	-0.14	-0.01	-0.29
ci@3:148880665:148881629:+|3:148880665:148880666:+.1	chr3:148880565-148881729	ENSG00000163755	HPS3	Hermansky-Pudlak syndrome 3	ci	NA	0.87	0.93	0.99	0.97	-0.12	-0.04	-0.1	-0.06
ci@3:15297810:15298360:-|3:15298359:15298360:-.1	chr3:15297710-15298460	ENSG00000131370	SH3BP5	SH3-domain binding protein 5 (BTK-associated)	ci	NA	0.49	0.41	0.95	0.5	-0.46	-0.09	-0.01	-0.54
ci@3:15298620:15300338:-|3:15300337:15300338:-.1	chr3:15298520-15300438	ENSG00000131370	SH3BP5	SH3-domain binding protein 5 (BTK-associated)	ci	NA	0.34	0.55	0.76	0.64	-0.42	-0.09	-0.3	-0.21
ci@3:15300557:15301268:-|3:15301267:15301268:-.1	chr3:15300457-15301368	ENSG00000131370	SH3BP5	SH3-domain binding protein 5 (BTK-associated)	ci	NA	0.33	0.45	0.71	0.52	-0.38	-0.07	-0.19	-0.26
ci@3:15452944:15455528:-|3:15455527:15455528:-.1	chr3:15452844-15455628	ENSG00000206562	METTL6	methyltransferase like 6	ci	NA	0.77	0.65	0.77	0.88	0	-0.23	-0.11	-0.12
ci@3:155544608:155545971:-|3:155545970:155545971:-.1	chr3:155544508-155546071	ENSG00000169359	SLC33A1	solute carrier family 33 (acetyl-CoA transporter), member 1	ci	NA	0.01	0.02	0.14	0.06	-0.13	-0.04	-0.05	-0.12
ci@3:156870030:156870825:-|3:156870824:156870825:-.1	chr3:156869930-156870925	ENSG00000163660	CCNL1	cyclin L1	ci	NA	0.79	0.7	0.87	0.87	-0.08	-0.17	-0.08	-0.17
ci@3:169500431:169501265:+|3:169500431:169500432:+.1	chr3:169500331-169501365	ENSG00000085274	MYNN	myoneurin	ci	NA	0.83	0.79	0.92	0.93	-0.09	-0.14	-0.1	-0.13
ci@3:169513399:169514002:-|3:169514001:169514002:-.1	chr3:169513299-169514102	ENSG00000171757	LRRC34	leucine rich repeat containing 34	ci	NA	0.35	0.09	0.5	0.5	-0.15	-0.41	-0.15	-0.41
ci@3:180327791:180335168:+|3:180327791:180327792:+.1	chr3:180327691-180335268	ENSG00000163728	TTC14	tetratricopeptide repeat domain 14	ci	NA	0.08	0.16	0.18	0.19	-0.1	-0.03	-0.11	-0.02
ci@3:182631782:182635811:+|3:182631782:182631783:+.1	chr3:182631682-182635911	ENSG00000058063	ATP11B	ATPase, class VI, type 11B	ci	NA	0.83	0.85	0.93	0.91	-0.1	-0.06	-0.08	-0.08
ci@3:183882719:183882901:+|3:183882719:183882720:+.1	chr3:183882619-183883001	ENSG00000161202	DVL3	dishevelled, dsh homolog 3 (Drosophila)	ci	NA	0.74	0.76	0.86	0.86	-0.12	-0.1	-0.12	-0.1
ci@3:184073566:184074781:-|3:184074780:184074781:-.1	chr3:184073466-184074881	ENSG00000114859	CLCN2	chloride channel, voltage-sensitive 2	ci	NA	0.95	0.82	1	1	-0.05	-0.18	-0.05	-0.18
ci@3:184556534:184557486:+|3:184556534:184556535:+.1	chr3:184556434-184557586	ENSG00000156931	VPS8	vacuolar protein sorting 8 homolog (S. cerevisiae)	ci	NA	0.82	0.8	1	0.91	-0.18	-0.11	-0.09	-0.2
ci@3:186269068:186272043:-|3:186272042:186272043:-.1	chr3:186268968-186272143	ENSG00000113838	TBCCD1	TBCC domain containing 1	ci	NA	0.83	0.83	0.98	0.94	-0.15	-0.11	-0.11	-0.15
ci@3:186505671:186506914:+|3:186505671:186505672:+.1	chr3:186505571-186507014	ENSG00000156976	EIF4A2	eukaryotic translation initiation factor 4A2	ci	NA	0.7	0.74	0.87	0.71	-0.17	0.03	-0.01	-0.13
ci@3:186507853:186507931:-|3:186507930:186507931:-.1	chr3:186507753-186508031	ENSG00000163918	RFC4	replication factor C (activator 1) 4, 37kDa	ci	NA	0.83	0.79	0.92	0.88	-0.09	-0.09	-0.05	-0.13
ci@3:186508044:186508115:-|3:186508114:186508115:-.1	chr3:186507944-186508215	ENSG00000163918	RFC4	replication factor C (activator 1) 4, 37kDa	ci	NA	0.86	0.75	0.91	0.87	-0.05	-0.12	-0.01	-0.16
ci@3:189349366:189455529:+|3:189349366:189349367:+.1	chr3:189349266-189455629	ENSG00000073282	TP63	tumor protein p63	ci	NA	1	1	0.82	1	0.18	0	0	0.18
ci@3:194309871:194310203:+|3:194309871:194309872:+.1	chr3:194309771-194310303	ENSG00000231770	TMEM44-AS1	NA	ci	NA	0.41	0.46	0.63	0.72	-0.22	-0.26	-0.31	-0.17
ci@3:195404719:195408061:+|3:195404719:195404720:+.1	chr3:195404619-195408161	ENSG00000215837	SDHAP2	NA	ci	NA	0.69	0.69	0.8	0.83	-0.11	-0.14	-0.14	-0.11
ci@3:195410736:195415404:+|3:195410736:195410737:+.1	chr3:195410636-195415504	ENSG00000215837	SDHAP2	NA	ci	NA	0.38	0.41	0.62	0.52	-0.24	-0.11	-0.14	-0.21
ci@3:196281678:196287867:-|3:196287866:196287867:-.1	chr3:196281578-196287967	ENSG00000185798	WDR53	WD repeat domain 53	ci	NA	0.8	0.74	0.95	0.92	-0.15	-0.18	-0.12	-0.21
ci@3:196730322:196730772:-|3:196730771:196730772:-.1	chr3:196730222-196730872	ENSG00000163975	MFI2	antigen p97 (melanoma associated) identified by monoclonal antibodies 133.2 and 96.5	ci	NA	0.11	0.03	0	0.19	0.11	-0.16	-0.08	0.03
ci@3:197260432:197273232:-|3:197273231:197273232:-.1	chr3:197260332-197273332	ENSG00000161267	BDH1	3-hydroxybutyrate dehydrogenase, type 1	ci	NA	0.87	0.63	0.95	0.91	-0.08	-0.28	-0.04	-0.32
ci@3:197420687:197421246:-|3:197421245:197421246:-.1	chr3:197420587-197421346	ENSG00000145016	KIAA0226	KIAA0226	ci	NA	0.86	0.94	0.95	0.98	-0.09	-0.04	-0.12	-0.01
ci@3:197913385:197915543:+|3:197913385:197913386:+.1	chr3:197913285-197915643	ENSG00000224450	AC073135.6	NA	ci	NA	0.92	0.92	0.71	0.89	0.21	0.03	0.03	0.21
ci@3:25832806:25833261:+|3:25832806:25832807:+.1	chr3:25832706-25833361	ENSG00000151093	OXSM	3-oxoacyl-ACP synthase, mitochondrial	ci	NA	0.08	0.08	0.29	0.05	-0.21	0.03	0.03	-0.21
ci@3:3189871:3190778:+|3:3189871:3189872:+.1	chr3:3189771-3190878	ENSG00000072756	TRNT1	tRNA nucleotidyl transferase, CCA-adding, 1	ci	NA	0.05	0.05	0.21	0.1	-0.16	-0.05	-0.05	-0.16
ci@3:3841603:3886048:+|3:3841603:3841604:+.1	chr3:3841503-3886148	ENSG00000175928	LRRN1	leucine rich repeat neuronal 1	ci	NA	0.85	0.81	1	0.88	-0.15	-0.07	-0.03	-0.19
ci@3:39433111:39433344:+|3:39433111:39433112:+.1	chr3:39433011-39433444	ENSG00000144659	SLC25A38	solute carrier family 25, member 38	ci	NA	0.85	0.84	0.95	0.88	-0.1	-0.04	-0.03	-0.11
ci@3:40433641:40442385:+|3:40433641:40433642:+.1	chr3:40433541-40442485	ENSG00000168032	ENTPD3	ectonucleoside triphosphate diphosphohydrolase 3	ci	NA	0.98	1	0.77	0.87	0.21	0.13	0.11	0.23
ci@3:47045883:47045985:+|3:47045883:47045884:+.1	chr3:47045783-47046085	ENSG00000160796	NBEAL2	neurobeachin-like 2	ci	NA	0.66	0.72	0.85	0.84	-0.19	-0.12	-0.18	-0.13
ci@3:47046080:47046462:+|3:47046080:47046081:+.1	chr3:47045980-47046562	ENSG00000160796	NBEAL2	neurobeachin-like 2	ci	NA	0.66	0.63	0.44	0.69	0.22	-0.06	-0.03	0.19
ci@3:47048840:47049015:+|3:47048840:47048841:+.1	chr3:47048740-47049115	ENSG00000160796	NBEAL2	neurobeachin-like 2	ci	NA	0.8	0.85	0.83	0.93	-0.03	-0.08	-0.13	0.02
ci@3:49159803:49160137:-|3:49160136:49160137:-.1	chr3:49159703-49160237	ENSG00000172037	LAMB2	laminin, beta 2 (laminin S)	ci	NA	0.79	0.76	0.81	0.88	-0.02	-0.12	-0.09	-0.05
ci@3:49162917:49163180:-|3:49163179:49163180:-.1	chr3:49162817-49163280	ENSG00000172037	LAMB2	laminin, beta 2 (laminin S)	ci	NA	0.76	0.79	0.76	0.89	0	-0.1	-0.13	0.03
ci@3:49462486:49462800:-|3:49462799:49462800:-.1	chr3:49462386-49462900	ENSG00000145029	NICN1	nicolin 1	ci	NA	0.33	0.36	0.56	0.59	-0.23	-0.23	-0.26	-0.2
ci@3:49758327:49758453:+|3:49758327:49758328:+.1	chr3:49758227-49758553	ENSG00000164068	RNF123	ring finger protein 123	ci	NA	0.42	0.47	0.33	0.4	0.09	0.07	0.02	0.14
ci@3:49878505:49879259:-|3:49879258:49879259:-.1	chr3:49878405-49879359	ENSG00000183763	TRAIP	TRAF interacting protein	ci	NA	0.92	0.8	1	0.94	-0.08	-0.14	-0.02	-0.2
ci@3:49879372:49879886:-|3:49879885:49879886:-.1	chr3:49879272-49879986	ENSG00000183763	TRAIP	TRAF interacting protein	ci	NA	0.9	0.64	0.89	0.95	0.01	-0.31	-0.05	-0.25
ci@3:49935118:49935484:-|3:49935483:49935484:-.1	chr3:49935018-49935584	ENSG00000164078	MST1R	macrophage stimulating 1 receptor (c-met-related tyrosine kinase)	ci	NA	0.61	0.62	0.62	0.72	-0.01	-0.1	-0.11	0
ci@3:50141741:50142510:+|3:50141741:50141742:+.1	chr3:50141641-50142610	ENSG00000003756	RBM5	RNA binding motif protein 5	ci	NA	0.93	0.91	0.81	0.87	0.12	0.04	0.06	0.1
ci@3:50617370:50617547:+|3:50617370:50617371:+.1	chr3:50617270-50617647	ENSG00000114735	HEMK1	HemK methyltransferase family member 1	ci	NA	0.82	0.87	0.94	0.89	-0.12	-0.02	-0.07	-0.07
ci@3:50617660:50617812:+|3:50617660:50617661:+.1	chr3:50617560-50617912	ENSG00000114735	HEMK1	HemK methyltransferase family member 1	ci	NA	0.8	0.85	0.93	0.94	-0.13	-0.09	-0.14	-0.08
ci@3:51434555:51436166:-|3:51436165:51436166:-.1	chr3:51434455-51436266	ENSG00000145041	VPRBP	Vpr (HIV-1) binding protein	ci	NA	0.08	0.01	0.07	0.13	0.01	-0.12	-0.05	-0.06
ci@3:52156493:52159129:-|3:52159128:52159129:-.1	chr3:52156393-52159229	ENSG00000164087	POC1A	POC1 centriolar protein homolog A (Chlamydomonas)	ci	NA	0.92	0.88	0.98	0.99	-0.06	-0.11	-0.07	-0.1
ci@3:52439310:52439781:-|3:52439780:52439781:-.1	chr3:52439210-52439881	ENSG00000163930	BAP1	BRCA1 associated protein-1 (ubiquitin carboxy-terminal hydrolase)	ci	NA	0.87	0.79	0.92	0.93	-0.05	-0.14	-0.06	-0.13
ci@3:52514311:52518529:+|3:52514311:52514312:+.1	chr3:52514211-52518629	ENSG00000010322	NISCH	nischarin	ci	NA	0.43	0.55	0.74	0.75	-0.31	-0.2	-0.32	-0.19
ci@3:52729318:52729437:-|3:52729436:52729437:-.1	chr3:52729218-52729537	ENSG00000016864	GLT8D1	glycosyltransferase 8 domain containing 1	ci	NA	0.75	0.81	0.88	0.84	-0.13	-0.03	-0.09	-0.07
ci@3:62261641:62262647:+|3:62261641:62261642:+.1	chr3:62261541-62262747	ENSG00000144724	PTPRG	protein tyrosine phosphatase, receptor type, G	ci	NA	0.96	0.96	0.85	0.93	0.11	0.03	0.03	0.11
ci@3:69061950:69062725:-|3:69062724:69062725:-.1	chr3:69061850-69062825	ENSG00000163378	EOGT	EGF domain-specific O-linked N-acetylglucosamine (GlcNAc) transferase	ci	NA	0.89	0.97	0.79	0.81	0.1	0.16	0.08	0.18
ci@3:97605611:97607185:+|3:97605611:97605612:+.1	chr3:97605511-97607285	ENSG00000080200	CRYBG3	beta-gamma crystallin domain containing 3	ci	NA	0.85	0.84	0.98	0.98	-0.13	-0.14	-0.13	-0.14
ci@3:9801259:9801356:-|3:9801355:9801356:-.1	chr3:9801159-9801456	ENSG00000134072	CAMK1	calcium/calmodulin-dependent protein kinase I	ci	NA	0.87	0.71	0.88	0.91	-0.01	-0.2	-0.04	-0.17
ci@3:9801434:9802340:-|3:9802339:9802340:-.1	chr3:9801334-9802440	ENSG00000134072	CAMK1	calcium/calmodulin-dependent protein kinase I	ci	NA	0.94	0.81	0.79	0.76	0.15	0.05	0.18	0.02
ci@3:9862425:9867484:+|3:9862425:9862426:+.1	chr3:9862325-9867584	ENSG00000214021	TTLL3	tubulin tyrosine ligase-like family, member 3	ci	NA	0.96	0.93	0.93	0.82	0.03	0.11	0.14	0
ci@4:10084802:10086067:-|4:10086066:10086067:-.1	chr4:10084702-10086167	ENSG00000071127	WDR1	WD repeat domain 1	ci	NA	0.94	0.75	1	0.89	-0.06	-0.14	0.05	-0.25
ci@4:1018452:1018693:+|4:1018452:1018453:+.1	chr4:1018352-1018793	ENSG00000127418	FGFRL1	fibroblast growth factor receptor-like 1	ci	NA	0.82	0.89	0.94	0.91	-0.12	-0.02	-0.09	-0.05
ci@4:110639915:110650758:-|4:110650757:110650758:-.1	chr4:110639815-110650858	ENSG00000123739	PLA2G12A	phospholipase A2, group XIIA	ci	NA	0.86	0.9	0.99	0.95	-0.13	-0.05	-0.09	-0.09
ci@4:110884454:110885557:+|4:110884454:110884455:+.1	chr4:110884354-110885657	ENSG00000138798	EGF	epidermal growth factor	ci	NA	0.82	1	0.93	1	-0.11	0	-0.18	0.07
ci@4:111119523:111119678:-|4:111119677:111119678:-.1	chr4:111119423-111119778	ENSG00000170522	ELOVL6	ELOVL fatty acid elongase 6	ci	NA	0.51	0.48	0.67	0.72	-0.16	-0.24	-0.21	-0.19
ci@4:113346907:113347623:+|4:113346907:113346908:+.1	chr4:113346807-113347723	ENSG00000073331	ALPK1	alpha-kinase 1	ci	NA	0.82	0.75	0.88	0.95	-0.06	-0.2	-0.13	-0.13
ci@4:113362261:113362359:+|4:113362261:113362262:+.1	chr4:113362161-113362459	ENSG00000073331	ALPK1	alpha-kinase 1	ci	NA	0.75	0.68	0.82	0.85	-0.07	-0.17	-0.1	-0.14
ci@4:119203398:119203986:-|4:119203985:119203986:-.1	chr4:119203298-119204086	ENSG00000164099	PRSS12	protease, serine, 12 (neurotrypsin, motopsin)	ci	NA	0.8	0.77	0.95	0.93	-0.15	-0.16	-0.13	-0.18
ci@4:119621797:119625090:+|4:119621797:119621798:+.1	chr4:119621697-119625190	ENSG00000145388	METTL14	methyltransferase like 14	ci	NA	0.96	0.88	1	0.97	-0.04	-0.09	-0.01	-0.12
ci@4:120415678:120418966:+|4:120415678:120415679:+.1	chr4:120415578-120419066	ENSG00000245958	RP11-33B1.1	NA	ci	NA	0.95	0.66	0.65	0.96	0.3	-0.3	-0.01	0.01
ci@4:120415678:120418966:+|4:120415678:120415679:+.1	chr4:120415578-120419066	ENSG00000245958	RP11-33B1.1	NA	ci	NA	0.95	0.66	0.65	0.96	0.3	-0.3	-0.01	0.01
ci@4:120471598:120473043:+|4:120471598:120471599:+.1	chr4:120471498-120473143	ENSG00000245958	RP11-33B1.1	NA	ci	NA	0.52	0.73	0.85	0.85	-0.33	-0.12	-0.33	-0.12
ci@4:128951827:128956917:+|4:128951827:128951828:+.1	chr4:128951727-128957017	ENSG00000164074	C4orf29	chromosome 4 open reading frame 29	ci	NA	0.66	0.81	0.92	0.86	-0.26	-0.05	-0.2	-0.11
ci@4:129783380:129789011:+|4:129783380:129783381:+.1	chr4:129783280-129789111	ENSG00000077684	PHF17	PHD finger protein 17	ci	NA	0.46	0.64	0.78	0.41	-0.32	0.23	0.05	-0.14
ci@4:130030827:130032841:+|4:130030827:130030828:+.1	chr4:130030727-130032941	ENSG00000151470	C4orf33	chromosome 4 open reading frame 33	ci	NA	0.95	0.88	0.99	0.95	-0.04	-0.07	0	-0.11
ci@4:1374018:1374668:+|4:1374018:1374019:+.1	chr4:1373918-1374768	ENSG00000163945	UVSSA	UV-stimulated scaffold protein A	ci	NA	0.85	0.88	0.99	0.97	-0.14	-0.09	-0.12	-0.11
ci@4:1377728:1379656:+|4:1377728:1377729:+.1	chr4:1377628-1379756	ENSG00000163945	UVSSA	UV-stimulated scaffold protein A	ci	NA	0.82	0.65	0.81	0.88	0.01	-0.23	-0.06	-0.16
ci@4:139964497:139965793:+|4:139964497:139964498:+.1	chr4:139964397-139965893	ENSG00000151014	CCRN4L	CCR4 carbon catabolite repression 4-like (S. cerevisiae)	ci	NA	0.68	0.75	1	0.86	-0.32	-0.11	-0.18	-0.25
ci@4:142143645:142145641:+|4:142143645:142143646:+.1	chr4:142143545-142145741	ENSG00000109445	ZNF330	zinc finger protein 330	ci	NA	0.85	0.81	0.93	0.89	-0.08	-0.08	-0.04	-0.12
ci@4:144136096:144141448:+|4:144136096:144136097:+.1	chr4:144135996-144141548	ENSG00000170185	USP38	ubiquitin specific peptidase 38	ci	NA	0.97	0.96	0.97	0.83	0	0.13	0.14	-0.01
ci@4:154197282:154214134:+|4:154197282:154197283:+.1	chr4:154197182-154214234	ENSG00000109654	TRIM2	tripartite motif containing 2	ci	NA	0.9	0.85	0.77	0.79	0.13	0.06	0.11	0.08
ci@4:15607422:15613889:-|4:15613888:15613889:-.1	chr4:15607322-15613989	ENSG00000118564	FBXL5	F-box and leucine-rich repeat protein 5	ci	NA	0.85	0.92	0.97	0.94	-0.12	-0.02	-0.09	-0.05
ci@4:15688771:15690174:+|4:15688771:15688772:+.1	chr4:15688671-15690274	ENSG00000237765	FAM200B	family with sequence similarity 200, member B	ci	NA	0.23	0.16	0.39	0.34	-0.16	-0.18	-0.11	-0.23
ci@4:160264556:160265188:+|4:160264556:160264557:+.1	chr4:160264456-160265288	ENSG00000109756	RAPGEF2	Rap guanine nucleotide exchange factor (GEF) 2	ci	NA	0.63	0.76	0.97	0.7	-0.34	0.06	-0.07	-0.21
ci@4:174089264:174090015:-|4:174090014:174090015:-.1	chr4:174089164-174090115	ENSG00000245213	RP11-10K16.1	NA	ci	NA	0.05	0.02	0.29	0.07	-0.24	-0.05	-0.02	-0.27
ci@4:174090112:174169131:+|4:174090112:174090113:+.1	chr4:174090012-174169231	ENSG00000109586	GALNT7	UDP-N-acetyl-alpha-D-galactosamine:polypeptide N-acetylgalactosaminyltransferase 7 (GalNAc-T7)	ci	NA	0.97	0.98	0.86	0.95	0.11	0.03	0.02	0.12
ci@4:187113191:187115654:+|4:187113191:187113192:+.1	chr4:187113091-187115754	ENSG00000145476	CYP4V2	cytochrome P450, family 4, subfamily V, polypeptide 2	ci	NA	0.27	0.17	0.35	0.61	-0.08	-0.44	-0.34	-0.18
ci@4:187118284:187118687:+|4:187118284:187118285:+.1	chr4:187118184-187118787	ENSG00000145476	CYP4V2	cytochrome P450, family 4, subfamily V, polypeptide 2	ci	NA	0.6	0.82	0.89	0.94	-0.29	-0.12	-0.34	-0.07
ci@4:2254249:2259709:-|4:2259708:2259709:-.1	chr4:2254149-2259809	ENSG00000123933	MXD4	MAX dimerization protein 4	ci	NA	0.76	0.78	0.89	0.9	-0.13	-0.12	-0.14	-0.11
ci@4:24538796:24541731:-|4:24541730:24541731:-.1	chr4:24538696-24541831	ENSG00000109606	DHX15	DEAH (Asp-Glu-Ala-His) box polypeptide 15	ci	NA	0.79	0.77	0.84	0.88	-0.05	-0.11	-0.09	-0.07
ci@4:25392637:25393960:+|4:25392637:25392638:+.1	chr4:25392537-25394060	ENSG00000053900	ANAPC4	anaphase promoting complex subunit 4	ci	NA	0.88	0.92	0.99	0.93	-0.11	-0.01	-0.05	-0.07
ci@4:39465225:39466666:+|4:39465225:39465226:+.1	chr4:39465125-39466766	ENSG00000121897	LIAS	lipoic acid synthetase	ci	NA	0.83	0.81	0.9	0.94	-0.07	-0.13	-0.11	-0.09
ci@4:39466962:39469138:+|4:39466962:39466963:+.1	chr4:39466862-39469238	ENSG00000121897	LIAS	lipoic acid synthetase	ci	NA	0.88	0.9	0.99	0.97	-0.11	-0.07	-0.09	-0.09
ci@4:40753008:40762451:+|4:40753008:40753009:+.1	chr4:40752908-40762551	ENSG00000179299	NSUN7	NOP2/Sun domain family, member 7	ci	NA	0.73	0.62	0.83	0.71	-0.1	-0.09	0.02	-0.21
ci@4:48141039:48143372:-|4:48143371:48143372:-.1	chr4:48140939-48143472	ENSG00000135605	TEC	tec protein tyrosine kinase	ci	NA	0.98	0.77	1	1	-0.02	-0.23	-0.02	-0.23
ci@4:48143436:48147096:-|4:48147095:48147096:-.1	chr4:48143336-48147196	ENSG00000135605	TEC	tec protein tyrosine kinase	ci	NA	0.81	0.89	1	1	-0.19	-0.11	-0.19	-0.11
ci@4:521019:524225:+|4:521019:521020:+.1	chr4:520919-524325	ENSG00000174227	PIGG	phosphatidylinositol glycan anchor biosynthesis, class G	ci	NA	0.35	0.38	0.53	0.53	-0.18	-0.15	-0.18	-0.15
ci@4:524534:527607:+|4:524534:524535:+.1	chr4:524434-527707	ENSG00000174227	PIGG	phosphatidylinositol glycan anchor biosynthesis, class G	ci	NA	0.66	0.73	0.85	0.83	-0.19	-0.1	-0.17	-0.12
ci@4:57686745:57687774:-|4:57687773:57687774:-.1	chr4:57686645-57687874	ENSG00000128040	SPINK2	serine peptidase inhibitor, Kazal type 2 (acrosin-trypsin inhibitor)	ci	NA	0.45	0.4	0.52	0.47	-0.07	-0.07	-0.02	-0.12
ci@4:6621771:6622915:+|4:6621771:6621772:+.1	chr4:6621671-6623015	ENSG00000013288	MAN2B2	mannosidase, alpha, class 2B, member 2	ci	NA	0.88	0.92	0.77	0.86	0.11	0.06	0.02	0.15
ci@4:6710370:6710958:-|4:6710957:6710958:-.1	chr4:6710270-6711058	ENSG00000178988	MRFAP1L1	Morf4 family associated protein 1-like 1	ci	NA	0.68	0.72	0.82	0.81	-0.14	-0.09	-0.13	-0.1
ci@4:69185923:69188467:-|4:69188466:69188467:-.1	chr4:69185823-69188567	ENSG00000083896	YTHDC1	YTH domain containing 1	ci	NA	0.83	0.76	0.92	0.87	-0.09	-0.11	-0.04	-0.16
ci@4:7770735:7774547:-|4:7774546:7774547:-.1	chr4:7770635-7774647	ENSG00000196526	AFAP1	actin filament associated protein 1	ci	NA	0.96	0.92	0.83	0.93	0.13	-0.01	0.03	0.09
ci@4:7774737:7776466:-|4:7776465:7776466:-.1	chr4:7774637-7776566	ENSG00000196526	AFAP1	actin filament associated protein 1	ci	NA	0.96	0.93	0.83	0.9	0.13	0.03	0.06	0.1
ci@4:7776630:7780489:-|4:7780488:7780489:-.1	chr4:7776530-7780589	ENSG00000196526	AFAP1	actin filament associated protein 1	ci	NA	0.91	0.92	0.66	0.83	0.25	0.09	0.08	0.26
ci@4:79432660:79434546:+|4:79432660:79432661:+.1	chr4:79432560-79434646	ENSG00000138759	FRAS1	Fraser syndrome 1	ci	NA	0.96	1	0.93	0.86	0.03	0.14	0.1	0.07
ci@4:80827326:80828559:-|4:80828558:80828559:-.1	chr4:80827226-80828659	ENSG00000163297	ANTXR2	anthrax toxin receptor 2	ci	NA	0.09	0.09	0.24	0.25	-0.15	-0.16	-0.16	-0.15
ci@4:83816000:83816845:-|4:83816844:83816845:-.1	chr4:83815900-83816945	ENSG00000251022	THAP9-AS1	NA	ci	NA	0.64	0.63	0.81	0.8	-0.17	-0.17	-0.16	-0.18
ci@4:83820890:83821230:-|4:83821229:83821230:-.1	chr4:83820790-83821330	ENSG00000138674	SEC31A	SEC31 homolog A (S. cerevisiae)	ci	NA	0.11	0.16	0.39	0.24	-0.28	-0.08	-0.13	-0.23
ci@4:84382185:84382274:+|4:84382185:84382186:+.1	chr4:84382085-84382374	ENSG00000163319	MRPS18C	mitochondrial ribosomal protein S18C	ci	NA	0.84	0.88	0.95	0.91	-0.11	-0.03	-0.07	-0.07
ci@4:87689129:87690922:+|4:87689129:87689130:+.1	chr4:87689029-87691022	ENSG00000163629	PTPN13	protein tyrosine phosphatase, non-receptor type 13 (APO-1/CD95 (Fas)-associated phosphatase)	ci	NA	0.92	0.97	0.96	0.8	-0.04	0.17	0.12	0.01
ci@5:118469080:118469189:+|5:118469080:118469081:+.1	chr5:118468980-118469289	ENSG00000172869	DMXL1	Dmx-like 1	ci	NA	0.84	0.77	1	0.93	-0.16	-0.16	-0.09	-0.23
ci@5:131930736:131931265:+|5:131930736:131930737:+.1	chr5:131930636-131931365	ENSG00000113522	RAD50	RAD50 homolog (S. cerevisiae)	ci	NA	0.84	0.87	0.97	0.96	-0.13	-0.09	-0.12	-0.1
ci@5:134191017:134193047:+|5:134191017:134191018:+.1	chr5:134190917-134193147	ENSG00000181904	C5orf24	chromosome 5 open reading frame 24	ci	NA	0.15	0.12	0.22	0.11	-0.07	0.01	0.04	-0.1
ci@5:137464268:137464952:-|5:137464951:137464952:-.1	chr5:137464168-137465052	ENSG00000112981	NME5	NME/NM23 family member 5	ci	NA	0.88	0.94	0.99	0.96	-0.11	-0.02	-0.08	-0.05
ci@5:139061032:139062448:+|5:139061032:139061033:+.1	chr5:139060932-139062548	ENSG00000171604	CXXC5	CXXC finger protein 5	ci	NA	0.75	1	0.94	0.93	-0.19	0.07	-0.18	0.06
ci@5:140021638:140021900:+|5:140021638:140021639:+.1	chr5:140021538-140022000	ENSG00000113119	TMCO6	transmembrane and coiled-coil domains 6	ci	NA	0.55	0.58	0.69	0.7	-0.14	-0.12	-0.15	-0.11
ci@5:140024325:140024570:+|5:140024325:140024326:+.1	chr5:140024225-140024670	ENSG00000113119	TMCO6	transmembrane and coiled-coil domains 6	ci	NA	0.83	0.71	0.93	0.92	-0.1	-0.21	-0.09	-0.22
ci@5:141019216:141019487:+|5:141019216:141019217:+.1	chr5:141019116-141019587	ENSG00000164620	RELL2	RELT-like 2	ci	NA	0.42	0.39	0.57	0.65	-0.15	-0.26	-0.23	-0.18
ci@5:141019862:141019979:+|5:141019862:141019863:+.1	chr5:141019762-141020079	ENSG00000164620	RELL2	RELT-like 2	ci	NA	0.42	0.39	0.6	0.57	-0.18	-0.18	-0.15	-0.21
ci@5:141020012:141020238:+|5:141020012:141020013:+.1	chr5:141019912-141020338	ENSG00000164620	RELL2	RELT-like 2	ci	NA	0.31	0.29	0.5	0.43	-0.19	-0.14	-0.12	-0.21
ci@5:141027663:141028524:-|5:141028523:141028524:-.1	chr5:141027563-141028624	ENSG00000197948	FCHSD1	FCH and double SH3 domains 1	ci	NA	0.87	0.94	1	0.97	-0.13	-0.03	-0.1	-0.06
ci@5:141314151:141316763:+|5:141314151:141314152:+.1	chr5:141314051-141316863	ENSG00000081791	KIAA0141	KIAA0141	ci	NA	0.58	0.58	0.73	0.66	-0.15	-0.08	-0.08	-0.15
ci@5:14399179:14401072:+|5:14399179:14399180:+.1	chr5:14399079-14401172	ENSG00000038382	TRIO	trio Rho guanine nucleotide exchange factor	ci	NA	0.87	0.87	0.75	0.86	0.12	0.01	0.01	0.12
ci@5:14711419:14712983:-|5:14712982:14712983:-.1	chr5:14711319-14713083	ENSG00000154122	ANKH	ankylosis, progressive homolog (mouse)	ci	NA	0.65	0.6	0.74	0.77	-0.09	-0.17	-0.12	-0.14
ci@5:14713082:14713653:-|5:14713652:14713653:-.1	chr5:14712982-14713753	ENSG00000154122	ANKH	ankylosis, progressive homolog (mouse)	ci	NA	0.48	0.53	0.64	0.63	-0.16	-0.1	-0.15	-0.11
ci@5:148745716:148746923:+|5:148745716:148745717:+.1	chr5:148745616-148747023	ENSG00000145882	PCYOX1L	prenylcysteine oxidase 1 like	ci	NA	0.87	0.93	0.93	1	-0.06	-0.07	-0.13	0
ci@5:149406680:149410304:+|5:149406680:149406681:+.1	chr5:149406580-149410404	ENSG00000113716	HMGXB3	HMG box domain containing 3	ci	NA	0.74	0.84	0.9	0.85	-0.16	-0.01	-0.11	-0.06
ci@5:149918918:149919644:+|5:149918918:149918919:+.1	chr5:149918818-149919744	ENSG00000070614	NDST1	N-deacetylase/N-sulfotransferase (heparan glucosaminyl) 1	ci	NA	0.92	0.88	0.79	0.84	0.13	0.04	0.08	0.09
ci@5:150925898:150928856:-|5:150928855:150928856:-.1	chr5:150925798-150928956	ENSG00000086570	FAT2	FAT tumor suppressor homolog 2 (Drosophila)	ci	NA	0.79	0.72	0.51	0.66	0.28	0.06	0.13	0.21
ci@5:170343588:170345717:+|5:170343588:170343589:+.1	chr5:170343488-170345817	ENSG00000204764	RANBP17	RAN binding protein 17	ci	NA	0.61	0.88	0.95	0.79	-0.34	0.09	-0.18	-0.07
ci@5:170632616:170640635:+|5:170632616:170632617:+.1	chr5:170632516-170640735	ENSG00000204764	RANBP17	RAN binding protein 17	ci	NA	0.74	0.83	0.91	0.96	-0.17	-0.13	-0.22	-0.08
ci@5:175958022:175958464:-|5:175958463:175958464:-.1	chr5:175957922-175958564	ENSG00000146083	RNF44	ring finger protein 44	ci	NA	0.87	0.85	0.89	0.97	-0.02	-0.12	-0.1	-0.04
ci@5:176471534:176477752:+|5:176471534:176471535:+.1	chr5:176471434-176477852	ENSG00000113761	ZNF346	zinc finger protein 346	ci	NA	0.82	0.83	0.98	0.84	-0.16	-0.01	-0.02	-0.15
ci@5:176562201:176562942:+|5:176562201:176562202:+.1	chr5:176562101-176563042	ENSG00000165671	NSD1	nuclear receptor binding SET domain protein 1	ci	NA	0.79	0.83	0.79	0.91	0	-0.08	-0.12	0.04
ci@5:179045324:179046270:-|5:179046269:179046270:-.1	chr5:179045224-179046370	ENSG00000169045	HNRNPH1	heterogeneous nuclear ribonucleoprotein H1 (H)	ci	NA	0.7	0.72	0.72	0.81	-0.02	-0.09	-0.11	0
ci@5:179046408:179047893:-|5:179047892:179047893:-.1	chr5:179046308-179047993	ENSG00000169045	HNRNPH1	heterogeneous nuclear ribonucleoprotein H1 (H)	ci	NA	0.66	0.64	0.74	0.77	-0.08	-0.13	-0.11	-0.1
ci@5:179264204:179264760:-|5:179264759:179264760:-.1	chr5:179264104-179264860	ENSG00000161010	C5orf45	chromosome 5 open reading frame 45	ci	NA	0.14	0.14	0.02	0.08	0.12	0.06	0.06	0.12
ci@5:179264885:179267872:-|5:179267871:179267872:-.1	chr5:179264785-179267972	ENSG00000161010	C5orf45	chromosome 5 open reading frame 45	ci	NA	0.47	0.47	0.47	0.59	0	-0.12	-0.12	0
ci@5:180275082:180278381:-|5:180278380:180278381:-.1	chr5:180274982-180278481	ENSG00000196670	ZFP62	ZFP62 zinc finger protein	ci	NA	0.07	0.05	0.24	0.17	-0.17	-0.12	-0.1	-0.19
ci@5:180688385:180698574:+|5:180688385:180688386:+.1	chr5:180688285-180698674	ENSG00000248275	CTC-338M12.3	NA	ci	NA	0.23	0.11	0.42	0.26	-0.19	-0.15	-0.03	-0.31
ci@5:43476360:43479992:-|5:43479991:43479992:-.1	chr5:43476260-43480092	ENSG00000151881	C5orf28	chromosome 5 open reading frame 28	ci	NA	0.06	0.2	0.18	0.36	-0.12	-0.16	-0.3	0.02
ci@5:43502597:43503767:-|5:43503766:43503767:-.1	chr5:43502497-43503867	ENSG00000172244	C5orf34	chromosome 5 open reading frame 34	ci	NA	0.83	0.71	1	0.93	-0.17	-0.22	-0.1	-0.29
ci@5:43503862:43505850:-|5:43505849:43505850:-.1	chr5:43503762-43505950	ENSG00000172244	C5orf34	chromosome 5 open reading frame 34	ci	NA	0.65	0.69	0.97	0.83	-0.32	-0.14	-0.18	-0.28
ci@5:43583668:43602880:-|5:43602879:43602880:-.1	chr5:43583568-43602980	ENSG00000248092	RP11-159F24.1	NA	ci	NA	0.56	0.53	0.73	0.66	-0.17	-0.13	-0.1	-0.2
ci@5:470102:471214:+|5:470102:470103:+.1	chr5:470002-471314	ENSG00000180104	EXOC3	exocyst complex component 3	ci	NA	0.55	0.38	0.92	0.5	-0.37	-0.12	0.05	-0.54
ci@5:49963020:49963905:+|5:49963020:49963021:+.1	chr5:49962920-49964005	ENSG00000151883	PARP8	poly (ADP-ribose) polymerase family, member 8	ci	NA	0.81	0.74	0.55	0.66	0.26	0.08	0.15	0.19
ci@5:52408864:52409689:+|5:52408864:52408865:+.1	chr5:52408764-52409789	ENSG00000247796	CTD-2366F13.1	NA	ci	NA	0.1	0.06	0.45	0.14	-0.35	-0.08	-0.04	-0.39
ci@5:54516634:54516844:-|5:54516843:54516844:-.1	chr5:54516534-54516944	ENSG00000234602	MCIN	multiciliate cell differentiation 1	ci	NA	0.47	0.35	0.72	0.6	-0.25	-0.25	-0.13	-0.37
ci@5:54518227:54518779:-|5:54518778:54518779:-.1	chr5:54518127-54518879	ENSG00000234602	MCIN	multiciliate cell differentiation 1	ci	NA	1	0.81	0.96	0.81	0.04	0	0.19	-0.15
ci@5:6374539:6377279:-|5:6377278:6377279:-.1	chr5:6374439-6377379	ENSG00000133398	MED10	mediator complex subunit 10	ci	NA	0.85	0.86	0.94	0.96	-0.09	-0.1	-0.11	-0.08
ci@5:640719:644414:+|5:640719:640720:+.1	chr5:640619-644514	ENSG00000112877	CEP72	centrosomal protein 72kDa	ci	NA	0.54	0.49	0.7	0.74	-0.16	-0.25	-0.2	-0.21
ci@5:6742710:6743825:+|5:6742710:6742711:+.1	chr5:6742610-6743925	ENSG00000112941	PAPD7	PAP associated domain containing 7	ci	NA	0.75	0.68	0.89	0.79	-0.14	-0.11	-0.04	-0.21
ci@5:67511777:67522118:+|5:67511777:67511778:+.1	chr5:67511677-67522218	ENSG00000145675	PIK3R1	phosphoinositide-3-kinase, regulatory subunit 1 (alpha)	ci	NA	0.98	0.95	0.73	0.67	0.25	0.28	0.31	0.22
ci@5:68602729:68603778:-|5:68603777:68603778:-.1	chr5:68602629-68603878	ENSG00000183323	CCDC125	coiled-coil domain containing 125	ci	NA	0.91	0.85	0.9	0.98	0.01	-0.13	-0.07	-0.05
ci@5:70341334:70343833:-|5:70343832:70343833:-.1	chr5:70341234-70343933	ENSG00000145736	GTF2H2	general transcription factor IIH, polypeptide 2, 44kDa	ci	NA	0.66	0.78	0.88	0.83	-0.22	-0.05	-0.17	-0.1
ci@5:70344676:70344895:-|5:70344894:70344895:-.1	chr5:70344576-70344995	ENSG00000145736	GTF2H2	general transcription factor IIH, polypeptide 2, 44kDa	ci	NA	0.76	0.78	0.66	0.95	0.1	-0.17	-0.19	0.12
ci@5:74951952:74955108:+|5:74951952:74951953:+.1	chr5:74951852-74955208	ENSG00000189045	ANKDD1B	ankyrin repeat and death domain containing 1B	ci	NA	0.83	0.97	1	0.93	-0.17	0.04	-0.1	-0.03
ci@5:76374553:76382936:-|5:76382935:76382936:-.1	chr5:76374453-76383036	ENSG00000132846	ZBED3	zinc finger, BED-type containing 3	ci	NA	0.93	0.88	0.89	0.73	0.04	0.15	0.2	-0.01
ci@5:77655809:77656038:-|5:77656037:77656038:-.1	chr5:77655709-77656138	ENSG00000245556	CTD-2037K23.2	NA	ci	NA	0.67	0.8	0.9	0.88	-0.23	-0.08	-0.21	-0.1
ci@5:81600669:81600753:+|5:81600669:81600670:+.1	chr5:81600569-81600853	ENSG00000205464	ATP6AP1L	ATPase, H+ transporting, lysosomal accessory protein 1-like	ci	NA	0.53	0.63	0.81	0.79	-0.28	-0.16	-0.26	-0.18
ci@5:87492305:87493486:-|5:87493485:87493486:-.1	chr5:87492205-87493586	ENSG00000164180	TMEM161B	transmembrane protein 161B	ci	NA	0.84	0.94	0.99	0.95	-0.15	-0.01	-0.11	-0.05
ci@5:87493582:87494793:-|5:87494792:87494793:-.1	chr5:87493482-87494893	ENSG00000164180	TMEM161B	transmembrane protein 161B	ci	NA	0.79	0.79	0.92	0.9	-0.13	-0.11	-0.11	-0.13
ci@6:109477080:109480228:+|6:109477080:109477081:+.1	chr6:109476980-109480328	ENSG00000183137	CEP57L1	centrosomal protein 57kDa-like 1	ci	NA	0.75	0.54	0.81	0.8	-0.06	-0.26	-0.05	-0.27
ci@6:109764623:109764720:+|6:109764623:109764624:+.1	chr6:109764523-109764820	ENSG00000135587	SMPD2	sphingomyelin phosphodiesterase 2, neutral membrane (neutral sphingomyelinase)	ci	NA	0.81	0.88	0.92	0.95	-0.11	-0.07	-0.14	-0.04
ci@6:109766001:109766099:-|6:109766098:109766099:-.1	chr6:109765901-109766199	ENSG00000135596	MICAL1	microtubule associated monoxygenase, calponin and LIM domain containing 1	ci	NA	0.93	0.9	0.89	0.75	0.04	0.15	0.18	0.01
ci@6:109767065:109767339:-|6:109767338:109767339:-.1	chr6:109766965-109767439	ENSG00000135596	MICAL1	microtubule associated monoxygenase, calponin and LIM domain containing 1	ci	NA	0.82	0.86	0.98	0.94	-0.16	-0.08	-0.12	-0.12
ci@6:109772903:109773449:-|6:109773448:109773449:-.1	chr6:109772803-109773549	ENSG00000135596	MICAL1	microtubule associated monoxygenase, calponin and LIM domain containing 1	ci	NA	0.57	0.49	0.78	0.44	-0.21	0.05	0.13	-0.29
ci@6:109773604:109773714:-|6:109773713:109773714:-.1	chr6:109773504-109773814	ENSG00000135596	MICAL1	microtubule associated monoxygenase, calponin and LIM domain containing 1	ci	NA	0.91	0.85	1	1	-0.09	-0.15	-0.09	-0.15
ci@6:109954306:109954387:-|6:109954386:109954387:-.1	chr6:109954206-109954487	ENSG00000155085	AKD1	adenylate kinase domain containing 1	ci	NA	0.84	0.88	0.91	1	-0.07	-0.12	-0.16	-0.03
ci@6:112397712:112400836:-|6:112400835:112400836:-.1	chr6:112397612-112400936	ENSG00000074935	TUBE1	tubulin, epsilon 1	ci	NA	0.81	0.81	0.94	0.88	-0.13	-0.07	-0.07	-0.13
ci@6:116967097:116968622:-|6:116968621:116968622:-.1	chr6:116966997-116968722	ENSG00000153975	ZUFSP	zinc finger with UFM1-specific peptidase domain	ci	NA	0.79	0.89	0.94	0.87	-0.15	0.02	-0.08	-0.05
ci@6:119252903:119256056:-|6:119256055:119256056:-.1	chr6:119252803-119256156	ENSG00000111877	MCM9	minichromosome maintenance complex component 9	ci	NA	1	0.73	1	0.81	0	-0.08	0.19	-0.27
ci@6:127794536:127796438:-|6:127796437:127796438:-.1	chr6:127794436-127796538	ENSG00000214338	SOGA3	SOGA family member 3	ci	NA	0.11	0.06	0.48	0.22	-0.37	-0.16	-0.11	-0.42
ci@6:134328072:134349519:-|6:134349518:134349519:-.1	chr6:134327972-134349619	ENSG00000146411	SLC2A12	solute carrier family 2 (facilitated glucose transporter), member 12	ci	NA	0.87	0.93	0.85	0.72	0.02	0.21	0.15	0.08
ci@6:146209236:146214351:-|6:146214350:146214351:-.1	chr6:146209136-146214451	ENSG00000146414	SHPRH	SNF2 histone linker PHD RING helicase, E3 ubiquitin protein ligase	ci	NA	0.82	0.94	1	0.98	-0.18	-0.04	-0.16	-0.06
ci@6:150164260:150174139:-|6:150174138:150174139:-.1	chr6:150164160-150174239	ENSG00000120256	LRP11	low density lipoprotein receptor-related protein 11	ci	NA	0.58	0.6	0.55	0.46	0.03	0.14	0.12	0.05
ci@6:152686154:152688353:-|6:152688352:152688353:-.1	chr6:152686054-152688453	ENSG00000131018	SYNE1	spectrin repeat containing, nuclear envelope 1	ci	NA	0.9	0.8	0.36	0.7	0.54	0.1	0.2	0.44
ci@6:153332897:153345397:-|6:153345396:153345397:-.1	chr6:153332797-153345497	ENSG00000091844	RGS17	regulator of G-protein signaling 17	ci	NA	0.4	0.65	0.82	0.7	-0.42	-0.05	-0.3	-0.17
ci@6:158487667:158489679:+|6:158487667:158487668:+.1	chr6:158487567-158489779	ENSG00000078269	SYNJ2	synaptojanin 2	ci	NA	0.91	0.98	0.86	0.93	0.05	0.05	-0.02	0.12
ci@6:159083844:159084237:+|6:159083844:159083845:+.1	chr6:159083744-159084337	ENSG00000164674	SYTL3	synaptotagmin-like 3	ci	NA	0.37	0.56	0.63	0.55	-0.26	0.01	-0.18	-0.07
ci@6:160100330:160103506:-|6:160103505:160103506:-.1	chr6:160100230-160103606	ENSG00000112096	SOD2	superoxide dismutase 2, mitochondrial	ci	NA	0.22	0.2	0.41	0.28	-0.19	-0.08	-0.06	-0.21
ci@6:161413115:161455291:+|6:161413115:161413116:+.1	chr6:161413015-161455391	ENSG00000085511	MAP3K4	mitogen-activated protein kinase kinase kinase 4	ci	NA	0.76	0.63	0.8	0.83	-0.04	-0.2	-0.07	-0.17
ci@6:167417299:167417752:+|6:167417299:167417300:+.1	chr6:167417199-167417852	ENSG00000213066	FGFR1OP	FGFR1 oncogene partner	ci	NA	0.84	0.95	0.97	0.95	-0.13	0	-0.11	-0.02
ci@6:170105820:170110332:-|6:170110331:170110332:-.1	chr6:170105720-170110432	ENSG00000130024	PHF10	PHD finger protein 10	ci	NA	0.57	0.55	0.74	0.63	-0.17	-0.08	-0.06	-0.19
ci@6:170878867:170880498:+|6:170878867:170878868:+.1	chr6:170878767-170880598	ENSG00000112592	TBP	TATA box binding protein	ci	NA	0.94	0.87	0.98	0.97	-0.04	-0.1	-0.03	-0.11
ci@6:17688849:17706508:-|6:17706507:17706508:-.1	chr6:17688749-17706608	ENSG00000124789	NUP153	nucleoporin 153kDa	ci	NA	0.86	0.85	0.66	0.67	0.2	0.18	0.19	0.19
ci@6:17761108:17764386:-|6:17764385:17764386:-.1	chr6:17761008-17764486	ENSG00000137177	KIF13A	kinesin family member 13A	ci	NA	0.92	0.87	0.89	0.78	0.03	0.09	0.14	-0.02
ci@6:25084804:25087012:-|6:25087011:25087012:-.1	chr6:25084704-25087112	ENSG00000168405	CMAHP	cytidine monophospho-N-acetylneuraminic acid hydroxylase, pseudogene	ci	NA	0.78	0.83	0.96	0.87	-0.18	-0.04	-0.09	-0.13
ci@6:25969648:25972097:+|6:25969648:25969649:+.1	chr6:25969548-25972197	ENSG00000112343	TRIM38	tripartite motif containing 38	ci	NA	0.74	0.79	0.93	0.92	-0.19	-0.13	-0.18	-0.14
ci@6:25972327:25973282:+|6:25972327:25972328:+.1	chr6:25972227-25973382	ENSG00000112343	TRIM38	tripartite motif containing 38	ci	NA	0.8	0.79	0.92	0.85	-0.12	-0.06	-0.05	-0.13
ci@6:26448982:26449890:+|6:26448982:26448983:+.1	chr6:26448882-26449990	ENSG00000111801	BTN3A3	butyrophilin, subfamily 3, member A3	ci	NA	0.96	0.78	0.93	1	0.03	-0.22	-0.04	-0.15
ci@6:27220728:27222472:+|6:27220728:27220729:+.1	chr6:27220628-27222572	ENSG00000112812	PRSS16	protease, serine, 16 (thymus)	ci	NA	0.84	0.84	0.95	0.95	-0.11	-0.11	-0.11	-0.11
ci@6:28094699:28097208:+|6:28094699:28094700:+.1	chr6:28094599-28097308	ENSG00000196812	ZSCAN16	zinc finger and SCAN domain containing 16	ci	NA	0.65	0.73	0.84	0.85	-0.19	-0.12	-0.2	-0.11
ci@6:28967824:28971290:-|6:28971289:28971290:-.1	chr6:28967724-28971390	ENSG00000197935	ZNF311	zinc finger protein 311	ci	NA	0.58	0.9	0.71	0.55	-0.13	0.35	0.03	0.19
ci@6:29691304:29691435:+|6:29691304:29691305:+.1	chr6:29691204-29691535	ENSG00000204642	HLA-F	major histocompatibility complex, class I, F	ci	NA	0.86	0.83	0.92	0.94	-0.06	-0.11	-0.08	-0.09
ci@6:30039468:30040934:-|6:30040933:30040934:-.1	chr6:30039368-30041034	ENSG00000204618	RNF39	ring finger protein 39	ci	NA	0.73	0.51	0.38	0.54	0.35	-0.03	0.19	0.13
ci@6:30078455:30079425:-|6:30079424:30079425:-.1	chr6:30078355-30079525	ENSG00000204616	TRIM31	tripartite motif containing 31	ci	NA	0.71	0.54	0.42	0.59	0.29	-0.05	0.12	0.12
ci@6:3017219:3019713:+|6:3017219:3017220:+.1	chr6:3017119-3019813	ENSG00000124588	NQO2	NAD(P)H dehydrogenase, quinone 2	ci	NA	0.77	0.87	0.93	0.92	-0.16	-0.05	-0.15	-0.06
ci@6:30262741:30263909:-|6:30263908:30263909:-.1	chr6:30262641-30264009	ENSG00000231074	HCG18	NA	ci	NA	0.9	0.88	0.99	0.91	-0.09	-0.03	-0.01	-0.11
ci@6:30613886:30614246:+|6:30613886:30613887:+.1	chr6:30613786-30614346	ENSG00000137343	ATAT1	alpha tubulin acetyltransferase 1	ci	NA	0.55	0.37	0.49	0.77	0.06	-0.4	-0.22	-0.12
ci@6:31500688:31503144:-|6:31503143:31503144:-.1	chr6:31500588-31503244	ENSG00000254870	ATP6V1G2-DDX39B	ATP6V1G2-DDX39B readthrough (non-protein coding)	ci	NA	0.69	0.72	0.82	0.84	-0.13	-0.12	-0.15	-0.1
ci@6:31638785:31638933:+|6:31638785:31638786:+.1	chr6:31638685-31639033	ENSG00000240053	LY6G5B	lymphocyte antigen 6 complex, locus G5B	ci	NA	0.11	0.04	0.31	0.4	-0.2	-0.36	-0.29	-0.27
ci@6:31715209:31721078:+|6:31715209:31715210:+.1	chr6:31715109-31721178	ENSG00000204410	MSH5	mutS homolog 5 (E. coli)	ci	NA	0.8	0.8	0.97	0.9	-0.17	-0.1	-0.1	-0.17
ci@6:31721406:31725942:+|6:31721406:31721407:+.1	chr6:31721306-31726042	ENSG00000204410	MSH5	mutS homolog 5 (E. coli)	ci	NA	0.55	0.59	0.74	0.72	-0.19	-0.13	-0.17	-0.15
ci@6:31731332:31731841:+|6:31731332:31731333:+.1	chr6:31731232-31731941	ENSG00000255152	MSH5-SAPCD1	MSH5-SAPCD1 readthrough (non-protein coding)	ci	NA	0.59	0.46	0.65	0.76	-0.06	-0.3	-0.17	-0.19
ci@6:31936866:31937057:+|6:31936866:31936867:+.1	chr6:31936766-31937157	ENSG00000204351	SKIV2L	superkiller viralicidic activity 2-like (S. cerevisiae)	ci	NA	0.78	0.65	0.79	0.81	-0.01	-0.16	-0.03	-0.14
ci@6:31937197:31937292:+|6:31937197:31937198:+.1	chr6:31937097-31937392	ENSG00000204351	SKIV2L	superkiller viralicidic activity 2-like (S. cerevisiae)	ci	NA	0.45	0.47	0.58	0.6	-0.13	-0.13	-0.15	-0.11
ci@6:31937801:31937886:-|6:31937885:31937886:-.1	chr6:31937701-31937986	ENSG00000204348	DOM3Z	dom-3 homolog Z (C. elegans)	ci	NA	0.64	0.69	0.88	0.87	-0.24	-0.18	-0.23	-0.19
ci@6:31937980:31938120:-|6:31938119:31938120:-.1	chr6:31937880-31938220	ENSG00000204348	DOM3Z	dom-3 homolog Z (C. elegans)	ci	NA	0.62	0.66	0.8	0.78	-0.18	-0.12	-0.16	-0.14
ci@6:32154467:32154590:-|6:32154589:32154590:-.1	chr6:32154367-32154690	ENSG00000204304	PBX2	pre-B-cell leukemia homeobox 2	ci	NA	0.92	0.85	0.92	0.82	0	0.03	0.1	-0.07
ci@6:32806014:32806430:-|6:32806429:32806430:-.1	chr6:32805914-32806530	ENSG00000250264	TAP2	Uncharacterized protein	ci	NA	0.89	0.85	0.98	0.84	-0.09	0.01	0.05	-0.13
ci@6:33163813:33164211:-|6:33164210:33164211:-.1	chr6:33163713-33164311	ENSG00000204231	RXRB	retinoid X receptor, beta	ci	NA	0.83	0.85	0.95	0.9	-0.12	-0.05	-0.07	-0.1
ci@6:33168715:33169019:+|6:33168715:33168716:+.1	chr6:33168615-33169119	ENSG00000112473	SLC39A7	solute carrier family 39 (zinc transporter), member 7	ci	NA	0.45	0.37	0.53	0.42	-0.08	-0.05	0.03	-0.16
ci@6:33258227:33258493:+|6:33258227:33258228:+.1	chr6:33258127-33258593	ENSG00000204220	PFDN6	prefoldin subunit 6	ci	NA	0.86	0.84	0.95	0.92	-0.09	-0.08	-0.06	-0.11
ci@6:34848153:34850709:-|6:34850708:34850709:-.1	chr6:34848053-34850809	ENSG00000064995	TAF11	TAF11 RNA polymerase II, TATA box binding protein (TBP)-associated factor, 28kDa	ci	NA	0.85	0.9	1	0.97	-0.15	-0.07	-0.12	-0.1
ci@6:348841:350822:+|6:348841:348842:+.1	chr6:348741-350922	ENSG00000112679	DUSP22	dual specificity phosphatase 22	ci	NA	0.66	0.55	0.75	0.77	-0.09	-0.22	-0.11	-0.2
ci@6:35259514:35260331:+|6:35259514:35259515:+.1	chr6:35259414-35260431	ENSG00000065029	ZNF76	zinc finger protein 76	ci	NA	0.85	0.78	0.84	0.93	0.01	-0.15	-0.08	-0.06
ci@6:35448151:35452337:-|6:35452336:35452337:-.1	chr6:35448051-35452437	ENSG00000007866	TEAD3	TEA domain family member 3	ci	NA	0.81	0.71	0.91	0.95	-0.1	-0.24	-0.14	-0.2
ci@6:36164747:36168074:+|6:36164747:36164748:+.1	chr6:36164647-36168174	ENSG00000096070	BRPF3	bromodomain and PHD finger containing, 3	ci	NA	0.93	1	0.84	0.81	0.09	0.19	0.12	0.16
ci@6:36449536:36452491:+|6:36449536:36449537:+.1	chr6:36449436-36452591	ENSG00000112078	KCTD20	potassium channel tetramerisation domain containing 20	ci	NA	0.93	0.85	0.68	0.87	0.25	-0.02	0.06	0.17
ci@6:3849720:3850023:+|6:3849720:3849721:+.1	chr6:3849620-3850123	ENSG00000145945	FAM50B	family with sequence similarity 50, member B	ci	NA	0.65	0.7	0.65	0.78	0	-0.08	-0.13	0.05
ci@6:4062867:4063308:+|6:4062867:4062868:+.1	chr6:4062767-4063408	ENSG00000112739	PRPF4B	PRP4 pre-mRNA processing factor 4 homolog B (yeast)	ci	NA	0.5	0.56	0.69	0.49	-0.19	0.07	0.01	-0.13
ci@6:41898008:41898373:+|6:41898008:41898009:+.1	chr6:41897908-41898473	ENSG00000112578	BYSL	bystin-like	ci	NA	0.87	0.97	0.98	0.97	-0.11	0	-0.1	-0.01
ci@6:42025251:42034050:+|6:42025251:42025252:+.1	chr6:42025151-42034150	ENSG00000137413	TAF8	TAF8 RNA polymerase II, TATA box binding protein (TBP)-associated factor, 43kDa	ci	NA	0.88	0.89	0.65	0.75	0.23	0.14	0.13	0.24
ci@6:42854208:42854898:+|6:42854208:42854209:+.1	chr6:42854108-42854998	ENSG00000146223	RPL7L1	ribosomal protein L7-like 1	ci	NA	0.24	0.18	0.37	0.29	-0.13	-0.11	-0.05	-0.19
ci@6:43471444:43472499:+|6:43471444:43471445:+.1	chr6:43471344-43472599	ENSG00000137221	TJAP1	tight junction associated protein 1 (peripheral)	ci	NA	0.74	0.68	0.87	0.88	-0.13	-0.2	-0.14	-0.19
ci@6:43590541:43591474:-|6:43591473:43591474:-.1	chr6:43590441-43591574	ENSG00000172432	GTPBP2	GTP binding protein 2	ci	NA	0.8	0.74	0.82	0.85	-0.02	-0.11	-0.05	-0.08
ci@6:43592799:43593100:-|6:43593099:43593100:-.1	chr6:43592699-43593200	ENSG00000172432	GTPBP2	GTP binding protein 2	ci	NA	0.54	0.56	0.54	0.68	0	-0.12	-0.14	0.02
ci@6:43965045:43966955:-|6:43966954:43966955:-.1	chr6:43964945-43967055	ENSG00000237686	RP5-1120P11.1	NA	ci	NA	0.15	0.16	0.43	0.36	-0.28	-0.2	-0.21	-0.27
ci@6:43967245:43968328:-|6:43968327:43968328:-.1	chr6:43967145-43968428	ENSG00000237686	RP5-1120P11.1	NA	ci	NA	0.11	0.07	0.32	0.1	-0.21	-0.03	0.01	-0.25
ci@6:49448793:49456065:+|6:49448793:49448794:+.1	chr6:49448693-49456165	ENSG00000031691	CENPQ	centromere protein Q	ci	NA	0.88	1	1	0.99	-0.12	0.01	-0.11	0
ci@6:49520283:49520690:+|6:49520283:49520284:+.1	chr6:49520183-49520790	ENSG00000197261	C6orf141	chromosome 6 open reading frame 141	ci	NA	0.34	0.29	0.65	0.13	-0.31	0.16	0.21	-0.36
ci@6:49522870:49529417:+|6:49522870:49522871:+.1	chr6:49522770-49529517	ENSG00000197261	C6orf141	chromosome 6 open reading frame 141	ci	NA	0.42	0.32	0.8	0.6	-0.38	-0.28	-0.18	-0.48
ci@6:74124409:74125220:+|6:74124409:74124410:+.1	chr6:74124309-74125320	ENSG00000080007	DDX43	DEAD (Asp-Glu-Ala-Asp) box polypeptide 43	ci	NA	0.83	0.87	0.98	0.92	-0.15	-0.05	-0.09	-0.11
ci@6:79668317:79671407:-|6:79671406:79671407:-.1	chr6:79668217-79671507	ENSG00000146247	PHIP	pleckstrin homology domain interacting protein	ci	NA	0.94	0.88	0.76	0.93	0.18	-0.05	0.01	0.12
ci@6:83904371:83905314:+|6:83904371:83904372:+.1	chr6:83904271-83905414	ENSG00000013392	RWDD2A	RWD domain containing 2A	ci	NA	0.55	0.61	0.81	0.72	-0.26	-0.11	-0.17	-0.2
ci@6:86160196:86176778:+|6:86160196:86160197:+.1	chr6:86160096-86176878	ENSG00000135318	NT5E	5'-nucleotidase, ecto (CD73)	ci	NA	0.88	0.78	0.86	0.93	0.02	-0.15	-0.05	-0.08
ci@6:99322317:99323291:-|6:99323290:99323291:-.1	chr6:99322217-99323391	ENSG00000112234	FBXL4	F-box and leucine-rich repeat protein 4	ci	NA	0.91	0.72	0.94	0.9	-0.03	-0.18	0.01	-0.22
ci@6:99850586:99851705:-|6:99851704:99851705:-.1	chr6:99850486-99851805	ENSG00000132424	PNISR	PNN-interacting serine/arginine-rich protein	ci	NA	0.53	0.47	0.61	0.59	-0.08	-0.12	-0.06	-0.14
ci@6:99851758:99852479:-|6:99852478:99852479:-.1	chr6:99851658-99852579	ENSG00000132424	PNISR	PNN-interacting serine/arginine-rich protein	ci	NA	0.43	0.45	0.62	0.48	-0.19	-0.03	-0.05	-0.17
ci@7:100174400:100174525:-|7:100174524:100174525:-.1	chr7:100174300-100174625	ENSG00000077454	LRCH4	leucine-rich repeats and calponin homology (CH) domain containing 4	ci	NA	0.67	0.72	0.71	0.87	-0.04	-0.15	-0.2	0.01
ci@7:100479862:100481691:+|7:100479862:100479863:+.1	chr7:100479762-100481791	ENSG00000087087	SRRT	serrate RNA effector molecule homolog (Arabidopsis)	ci	NA	0.72	0.74	0.89	0.92	-0.17	-0.18	-0.2	-0.15
ci@7:100876195:100877559:-|7:100877558:100877559:-.1	chr7:100876095-100877659	ENSG00000106404	CLDN15	claudin 15	ci	NA	0.75	0.76	0.69	0.49	0.06	0.27	0.26	0.07
ci@7:102953090:102953394:-|7:102953393:102953394:-.1	chr7:102952990-102953494	ENSG00000105821	DNAJC2	DnaJ (Hsp40) homolog, subfamily C, member 2	ci	NA	0.9	0.84	0.96	0.88	-0.06	-0.04	0.02	-0.12
ci@7:102963079:102963150:-|7:102963149:102963150:-.1	chr7:102962979-102963250	ENSG00000105821	DNAJC2	DnaJ (Hsp40) homolog, subfamily C, member 2	ci	NA	0.74	0.84	0.87	0.94	-0.13	-0.1	-0.2	-0.03
ci@7:106844075:106850971:-|7:106850970:106850971:-.1	chr7:106843975-106851071	ENSG00000164597	COG5	component of oligomeric golgi complex 5	ci	NA	0.88	0.84	0.95	0.87	-0.07	-0.03	0.01	-0.11
ci@7:138740041:138745782:-|7:138745781:138745782:-.1	chr7:138739941-138745882	ENSG00000105939	ZC3HAV1	zinc finger CCCH-type, antiviral 1	ci	NA	0.84	0.76	0.64	0.71	0.2	0.05	0.13	0.12
ci@7:143956725:143969538:-|7:143969537:143969538:-.1	chr7:143956625-143969638	ENSG00000204959	RP4-798C17.5	NA	ci	NA	0.14	0.1	0.38	0.22	-0.24	-0.12	-0.08	-0.28
ci@7:148513870:148514314:-|7:148514313:148514314:-.1	chr7:148513770-148514414	ENSG00000106462	EZH2	enhancer of zeste homolog 2 (Drosophila)	ci	NA	0.64	0.59	0.89	0.88	-0.25	-0.29	-0.24	-0.3
ci@7:148514483:148514969:-|7:148514968:148514969:-.1	chr7:148514383-148515069	ENSG00000106462	EZH2	enhancer of zeste homolog 2 (Drosophila)	ci	NA	0.65	0.67	0.92	0.91	-0.27	-0.24	-0.26	-0.25
ci@7:148815440:148823288:-|7:148823287:148823288:-.1	chr7:148815340-148823388	ENSG00000204947	ZNF425	zinc finger protein 425	ci	NA	0.61	0.71	0.53	0.36	0.08	0.35	0.25	0.18
ci@7:148921082:148921340:+|7:148921082:148921083:+.1	chr7:148920982-148921440	ENSG00000170265	ZNF282	zinc finger protein 282	ci	NA	0.04	0.1	0.05	0	-0.01	0.1	0.04	0.05
ci@7:149248917:149249892:-|7:149249891:149249892:-.1	chr7:149248817-149249992	ENSG00000133624	ZNF767	NA	ci	NA	0.52	0.66	0.79	0.69	-0.27	-0.03	-0.17	-0.13
ci@7:149545521:149547250:+|7:149545521:149545522:+.1	chr7:149545421-149547350	ENSG00000106479	ZNF862	zinc finger protein 862	ci	NA	0.39	0.42	0.41	0.62	-0.02	-0.2	-0.23	0.01
ci@7:150710467:150710812:+|7:150710467:150710468:+.1	chr7:150710367-150710912	ENSG00000164867	NOS3	nitric oxide synthase 3 (endothelial cell)	ci	NA	0.22	0.25	0.07	0.2	0.15	0.05	0.02	0.18
ci@7:150936583:150936710:-|7:150936709:150936710:-.1	chr7:150936483-150936810	ENSG00000082014	SMARCD3	SWI/SNF related, matrix associated, actin dependent regulator of chromatin, subfamily d, member 3	ci	NA	0.79	0.78	0.48	0.92	0.31	-0.14	-0.13	0.3
ci@7:150936832:150937198:-|7:150937197:150937198:-.1	chr7:150936732-150937298	ENSG00000082014	SMARCD3	SWI/SNF related, matrix associated, actin dependent regulator of chromatin, subfamily d, member 3	ci	NA	0.55	0.71	0.3	0.42	0.25	0.29	0.13	0.41
ci@7:150937333:150937511:-|7:150937510:150937511:-.1	chr7:150937233-150937611	ENSG00000082014	SMARCD3	SWI/SNF related, matrix associated, actin dependent regulator of chromatin, subfamily d, member 3	ci	NA	0.68	0.45	0.29	0.38	0.39	0.07	0.3	0.16
ci@7:151800363:151802330:+|7:151800363:151800364:+.1	chr7:151800263-151802430	ENSG00000178234	GALNT11	UDP-N-acetyl-alpha-D-galactosamine:polypeptide N-acetylgalactosaminyltransferase 11 (GalNAc-T11)	ci	NA	0.94	0.83	0.96	0.96	-0.02	-0.13	-0.02	-0.13
ci@7:151880241:151882643:-|7:151882642:151882643:-.1	chr7:151880141-151882743	ENSG00000055609	MLL3	myeloid/lymphoid or mixed-lineage leukemia 3	ci	NA	0.96	0.98	0.75	0.94	0.21	0.04	0.02	0.23
ci@7:155493638:155499554:+|7:155493638:155493639:+.1	chr7:155493538-155499654	ENSG00000184863	RBM33	RNA binding motif protein 33	ci	NA	0.85	0.82	0.68	0.7	0.17	0.12	0.15	0.14
ci@7:158447950:158448031:-|7:158448030:158448031:-.1	chr7:158447850-158448131	ENSG00000146918	NCAPG2	non-SMC condensin II complex, subunit G2	ci	NA	0.82	0.79	0.91	0.88	-0.09	-0.09	-0.06	-0.12
ci@7:21604015:21609687:+|7:21604015:21604016:+.1	chr7:21603915-21609787	ENSG00000105877	DNAH11	dynein, axonemal, heavy chain 11	ci	NA	0.83	0.9	1	1	-0.17	-0.1	-0.17	-0.1
ci@7:21609917:21611424:+|7:21609917:21609918:+.1	chr7:21609817-21611524	ENSG00000105877	DNAH11	dynein, axonemal, heavy chain 11	ci	NA	0.72	0.51	0.33	0.38	0.39	0.13	0.34	0.18
ci@7:21932285:21934241:+|7:21932285:21932286:+.1	chr7:21932185-21934341	ENSG00000105877	DNAH11	dynein, axonemal, heavy chain 11	ci	NA	0.96	0.97	1	0.75	-0.04	0.22	0.21	-0.03
ci@7:21934423:21934502:+|7:21934423:21934424:+.1	chr7:21934323-21934602	ENSG00000105877	DNAH11	dynein, axonemal, heavy chain 11	ci	NA	0.66	0.62	0.37	0.81	0.29	-0.19	-0.15	0.25
ci@7:2579522:2580613:-|7:2580612:2580613:-.1	chr7:2579422-2580713	ENSG00000106009	BRAT1	BRCA1-associated ATM activator 1	ci	NA	0.88	0.78	0.91	0.85	-0.03	-0.07	0.03	-0.13
ci@7:30603614:30608449:-|7:30608448:30608449:-.1	chr7:30603514-30608549	ENSG00000196295	AC005154.6	NA	ci	NA	0.52	0.75	0.85	1	-0.33	-0.25	-0.48	-0.1
ci@7:43663219:43663308:+|7:43663219:43663220:+.1	chr7:43663119-43663408	ENSG00000164543	STK17A	serine/threonine kinase 17a	ci	NA	0.89	0.83	0.92	0.99	-0.03	-0.16	-0.1	-0.09
ci@7:45023645:45023956:-|7:45023955:45023956:-.1	chr7:45023545-45024056	ENSG00000232956	SNHG15	NA	ci	NA	0.71	0.77	0.81	0.8	-0.1	-0.03	-0.09	-0.04
ci@7:45765835:45767777:-|7:45767776:45767777:-.1	chr7:45765735-45767877	ENSG00000214765	SEPT7P2	NA	ci	NA	0.22	0.37	0.76	0.35	-0.54	0.02	-0.13	-0.39
ci@7:4794246:4794868:+|7:4794246:4794247:+.1	chr7:4794146-4794968	ENSG00000164916	FOXK1	forkhead box K1	ci	NA	0.94	0.88	0.78	0.92	0.16	-0.04	0.02	0.1
ci@7:48018413:48019065:-|7:48019064:48019065:-.1	chr7:48018313-48019165	ENSG00000136273	HUS1	HUS1 checkpoint homolog (S. pombe)	ci	NA	0.96	0.97	0.84	0.93	0.12	0.04	0.03	0.13
ci@7:65221561:65222970:+|7:65221561:65221562:+.1	chr7:65221461-65223070	ENSG00000228409	CCT6P1	NA	ci	NA	0.94	0.84	1	0.96	-0.06	-0.12	-0.02	-0.16
ci@7:66774702:66785090:+|7:66774702:66774703:+.1	chr7:66774602-66785190	ENSG00000106610	STAG3L4	NA	ci	NA	0.97	0.88	0.97	0.99	0	-0.11	-0.02	-0.09
ci@7:72423969:72424050:-|7:72424049:72424050:-.1	chr7:72423869-72424150	ENSG00000106133	NSUN5P2	NA	ci	NA	0.08	0.16	0.47	0.24	-0.39	-0.08	-0.16	-0.31
ci@7:72468887:72469199:-|7:72469198:72469199:-.1	chr7:72468787-72469299	ENSG00000174353	STAG3L3	stromal antigen 3-like 3	ci	NA	0.39	0.55	0.62	0.41	-0.23	0.14	-0.02	-0.07
ci@7:72619498:72620192:+|7:72619498:72619499:+.1	chr7:72619398-72620292	ENSG00000233369	RP11-396K3.1	NA	ci	NA	0.6	0.78	0.59	0.87	0.01	-0.09	-0.27	0.19
ci@7:72619498:72620192:+|7:72619498:72619499:+.1	chr7:72619398-72620292	ENSG00000233369	RP11-396K3.1	NA	ci	NA	0.6	0.78	0.59	0.87	0.01	-0.09	-0.27	0.19
ci@7:7274170:7277886:+|7:7274170:7274171:+.1	chr7:7274070-7277986	ENSG00000106392	C1GALT1	core 1 synthase, glycoprotein-N-acetylgalactosamine 3-beta-galactosyltransferase, 1	ci	NA	0.94	0.89	1	0.97	-0.06	-0.08	-0.03	-0.11
ci@7:74239581:74247928:-|7:74247927:74247928:-.1	chr7:74239481-74248028	ENSG00000196275	GTF2IRD2	GTF2I repeat domain containing 2	ci	NA	0.05	0.55	0.31	0.37	-0.26	0.18	-0.32	0.24
ci@7:74239581:74247928:-|7:74247927:74247928:-.1	chr7:74239481-74248028	ENSG00000196275	GTF2IRD2	GTF2I repeat domain containing 2	ci	NA	0.05	0.55	0.31	0.37	-0.26	0.18	-0.32	0.24
ci@7:74299147:74299455:-|7:74299454:74299455:-.1	chr7:74299047-74299555	ENSG00000160828	AC004166.7	NA	ci	NA	0.42	0.46	0.46	0.61	-0.04	-0.15	-0.19	0
ci@7:76178973:76180781:+|7:76178973:76178974:+.1	chr7:76178873-76180881	ENSG00000205485	AC004980.7	NA	ci	NA	0.08	0.03	0.05	0.27	0.03	-0.24	-0.19	-0.02
ci@7:76255532:76256025:-|7:76256024:76256025:-.1	chr7:76255432-76256125	ENSG00000146707	POMZP3	POM121 and ZP3 fusion	ci	NA	0.77	0.81	0.82	0.92	-0.05	-0.11	-0.15	-0.01
ci@7:76955590:76957923:-|7:76957922:76957923:-.1	chr7:76955490-76958023	ENSG00000186088	PION	pigeon homolog (Drosophila)	ci	NA	0.83	0.66	0.92	0.85	-0.09	-0.19	-0.02	-0.26
ci@7:76957954:76958650:-|7:76958649:76958650:-.1	chr7:76957854-76958750	ENSG00000186088	PION	pigeon homolog (Drosophila)	ci	NA	0.77	0.59	0.84	0.73	-0.07	-0.14	0.04	-0.25
ci@7:76958708:76959556:-|7:76959555:76959556:-.1	chr7:76958608-76959656	ENSG00000186088	PION	pigeon homolog (Drosophila)	ci	NA	0.34	0.33	0.5	0.47	-0.16	-0.14	-0.13	-0.17
ci@7:89856812:89859186:+|7:89856812:89856813:+.1	chr7:89856712-89859286	ENSG00000157214	STEAP2	STEAP family member 2, metalloreductase	ci	NA	0.86	0.91	0.97	0.99	-0.11	-0.08	-0.13	-0.06
ci@7:91718843:91722411:+|7:91718843:91718844:+.1	chr7:91718743-91722511	ENSG00000127914	AKAP9	A kinase (PRKA) anchor protein (yotiao) 9	ci	NA	0.91	0.85	0.99	0.98	-0.08	-0.13	-0.07	-0.14
ci@7:92122443:92123607:-|7:92123606:92123607:-.1	chr7:92122343-92123707	ENSG00000127980	PEX1	peroxisomal biogenesis factor 1	ci	NA	0.81	0.85	0.88	0.92	-0.07	-0.07	-0.11	-0.03
ci@7:92887704:92888862:+|7:92887704:92887705:+.1	chr7:92887604-92888962	ENSG00000004766	CCDC132	coiled-coil domain containing 132	ci	NA	0.88	0.87	1	1	-0.12	-0.13	-0.12	-0.13
ci@7:99655028:99655321:+|7:99655028:99655029:+.1	chr7:99654928-99655421	ENSG00000166529	ZSCAN21	zinc finger and SCAN domain containing 21	ci	NA	0.98	0.94	0.93	0.86	0.05	0.08	0.12	0.01
ci@7:99933843:99935802:+|7:99933843:99933844:+.1	chr7:99933743-99935902	ENSG00000121716	PILRB	paired immunoglobin-like type 2 receptor beta	ci	NA	0.32	0.38	0.39	0.47	-0.07	-0.09	-0.15	-0.01
ci@7:99943591:99947354:+|7:99943591:99943592:+.1	chr7:99943491-99947454	ENSG00000121716	PILRB	paired immunoglobin-like type 2 receptor beta	ci	NA	0.45	0.48	0.84	0.7	-0.39	-0.22	-0.25	-0.36
ci@8:121468910:121471455:+|8:121468910:121468911:+.1	chr8:121468810-121471555	ENSG00000172167	MTBP	Mdm2, transformed 3T3 cell double minute 2, p53 binding protein (mouse) binding protein, 104kDa	ci	NA	0.91	0.87	0.91	1	0	-0.13	-0.09	-0.04
ci@8:124822591:124824759:+|8:124822591:124822592:+.1	chr8:124822491-124824859	ENSG00000176853	FAM91A1	family with sequence similarity 91, member A1	ci	NA	0.81	0.78	0.89	0.84	-0.08	-0.06	-0.03	-0.11
ci@8:143365846:143381847:-|8:143381846:143381847:-.1	chr8:143365746-143381947	ENSG00000171045	TSNARE1	t-SNARE domain containing 1	ci	NA	0.92	0.89	0.86	0.73	0.06	0.16	0.19	0.03
ci@8:144333510:144341945:+|8:144333510:144333511:+.1	chr8:144333410-144342045	ENSG00000181638	ZFP41	ZFP41 zinc finger protein	ci	NA	0.68	0.59	0.65	0.8	0.03	-0.21	-0.12	-0.06
ci@8:144349654:144351530:+|8:144349654:144349655:+.1	chr8:144349554-144351630	ENSG00000250571	GLI4	GLI family zinc finger 4	ci	NA	0.56	0.93	0.9	0.89	-0.34	0.04	-0.33	0.03
ci@8:144351690:144356874:+|8:144351690:144351691:+.1	chr8:144351590-144356974	ENSG00000250571	GLI4	GLI family zinc finger 4	ci	NA	0.57	0.66	0.78	0.62	-0.21	0.04	-0.05	-0.12
ci@8:144461678:144461999:+|8:144461678:144461679:+.1	chr8:144461578-144462099	ENSG00000158106	RHPN1	rhophilin, Rho GTPase binding protein 1	ci	NA	0.35	0.39	0.36	0.47	-0.01	-0.08	-0.12	0.03
ci@8:144462155:144462232:+|8:144462155:144462156:+.1	chr8:144462055-144462332	ENSG00000158106	RHPN1	rhophilin, Rho GTPase binding protein 1	ci	NA	0.74	0.81	0.69	0.64	0.05	0.17	0.1	0.12
ci@8:144462345:144462759:+|8:144462345:144462346:+.1	chr8:144462245-144462859	ENSG00000158106	RHPN1	rhophilin, Rho GTPase binding protein 1	ci	NA	0.33	0.33	0.38	0.49	-0.05	-0.16	-0.16	-0.05
ci@8:144650058:144650312:-|8:144650311:144650312:-.1	chr8:144649958-144650412	ENSG00000204839	MROH6	maestro heat-like repeat family member 6	ci	NA	0.62	0.58	0.57	0.74	0.05	-0.16	-0.12	0.01
ci@8:144650431:144650722:-|8:144650721:144650722:-.1	chr8:144650331-144650822	ENSG00000204839	MROH6	maestro heat-like repeat family member 6	ci	NA	0.63	0.65	0.55	0.82	0.08	-0.17	-0.19	0.1
ci@8:144659012:144659232:-|8:144659231:144659232:-.1	chr8:144658912-144659332	ENSG00000147813	NAPRT1	nicotinate phosphoribosyltransferase domain containing 1	ci	NA	0.62	0.18	0.31	0.52	0.31	-0.34	0.1	-0.13
ci@8:144659012:144659232:-|8:144659231:144659232:-.1	chr8:144658912-144659332	ENSG00000147813	NAPRT1	nicotinate phosphoribosyltransferase domain containing 1	ci	NA	0.62	0.18	0.31	0.52	0.31	-0.34	0.1	-0.13
ci@8:144659347:144659439:-|8:144659438:144659439:-.1	chr8:144659247-144659539	ENSG00000147813	NAPRT1	nicotinate phosphoribosyltransferase domain containing 1	ci	NA	0.71	0.68	0.61	0.32	0.1	0.36	0.39	0.07
ci@8:144920947:144921055:-|8:144921054:144921055:-.1	chr8:144920847-144921155	ENSG00000185189	NRBP2	nuclear receptor binding protein 2	ci	NA	0.83	0.76	0.86	0.9	-0.03	-0.14	-0.07	-0.1
ci@8:144921721:144921908:-|8:144921907:144921908:-.1	chr8:144921621-144922008	ENSG00000185189	NRBP2	nuclear receptor binding protein 2	ci	NA	0.51	0.6	0.53	0.71	-0.02	-0.11	-0.2	0.07
ci@8:145317220:145317299:-|8:145317298:145317299:-.1	chr8:145317120-145317399	ENSG00000204775	KM-PA-2	KM-PA-2 protein; Uncharacterized protein	ci	NA	0.36	0.44	0.54	0.65	-0.18	-0.21	-0.29	-0.1
ci@8:145318814:145318884:-|8:145318883:145318884:-.1	chr8:145318714-145318984	ENSG00000204775	KM-PA-2	KM-PA-2 protein; Uncharacterized protein	ci	NA	0.26	0.26	0.5	0.53	-0.24	-0.27	-0.27	-0.24
ci@8:145657843:145658971:-|8:145658970:145658971:-.1	chr8:145657743-145659071	ENSG00000160949	TONSL	tonsoku-like, DNA repair protein	ci	NA	0.9	0.8	0.9	0.93	0	-0.13	-0.03	-0.1
ci@8:145740841:145741148:-|8:145741147:145741148:-.1	chr8:145740741-145741248	ENSG00000160957	RECQL4	NA	ci	NA	0.89	0.84	0.97	0.95	-0.08	-0.11	-0.06	-0.13
ci@8:145979706:145980081:-|8:145980080:145980081:-.1	chr8:145979606-145980181	ENSG00000198169	ZNF251	zinc finger protein 251	ci	NA	0.67	0.63	0.82	0.65	-0.15	-0.02	0.02	-0.19
ci@8:17088357:17089936:-|8:17089935:17089936:-.1	chr8:17088257-17090036	ENSG00000198791	CNOT7	CCR4-NOT transcription complex, subunit 7	ci	NA	0.85	0.84	0.95	0.94	-0.1	-0.1	-0.09	-0.11
ci@8:21954020:21955027:+|8:21954020:21954021:+.1	chr8:21953920-21955127	ENSG00000158863	FAM160B2	family with sequence similarity 160, member B2	ci	NA	0.81	0.8	0.87	0.93	-0.06	-0.13	-0.12	-0.07
ci@8:22442912:22446811:+|8:22442912:22442913:+.1	chr8:22442812-22446911	ENSG00000120913	PDLIM2	PDZ and LIM domain 2 (mystique)	ci	NA	0.94	0.87	0.97	1	-0.03	-0.13	-0.06	-0.1
ci@8:22947801:22958150:+|8:22947801:22947802:+.1	chr8:22947701-22958250	ENSG00000173535	TNFRSF10C	tumor necrosis factor receptor superfamily, member 10c, decoy without an intracellular domain	ci	NA	0.65	0.89	1	0.8	-0.35	0.09	-0.15	-0.11
ci@8:24193154:24196979:+|8:24193154:24193155:+.1	chr8:24193054-24197079	ENSG00000042980	ADAM28	ADAM metallopeptidase domain 28	ci	NA	0.81	0.82	0.95	0.83	-0.14	-0.01	-0.02	-0.13
ci@8:38103468:38103751:+|8:38103468:38103469:+.1	chr8:38103368-38103851	ENSG00000085788	DDHD2	DDHD domain containing 2	ci	NA	0.83	0.73	0.82	0.9	0.01	-0.17	-0.07	-0.09
ci@8:38123829:38124785:-|8:38124784:38124785:-.1	chr8:38123729-38124885	ENSG00000147535	PPAPDC1B	phosphatidic acid phosphatase type 2 domain containing 1B	ci	NA	0.46	0.37	0.42	0.48	0.04	-0.11	-0.02	-0.05
ci@8:38176458:38178590:-|8:38178589:38178590:-.1	chr8:38176358-38178690	ENSG00000147548	WHSC1L1	Wolf-Hirschhorn syndrome candidate 1-like 1	ci	NA	0.89	0.83	0.76	0.76	0.13	0.07	0.13	0.07
ci@8:6262641:6263227:-|8:6263226:6263227:-.1	chr8:6262541-6263327	ENSG00000246089	RP11-115C21.2	NA	ci	NA	0.18	0.19	0.23	0.44	-0.05	-0.25	-0.26	-0.04
ci@8:67579936:67591956:+|8:67579936:67579937:+.1	chr8:67579836-67592056	ENSG00000104205	SGK3	serum/glucocorticoid regulated kinase family, member 3	ci	NA	0.15	0.28	0.45	0.37	-0.3	-0.09	-0.22	-0.17
ci@8:67955552:67958047:-|8:67958046:67958047:-.1	chr8:67955452-67958147	ENSG00000121022	COPS5	COP9 constitutive photomorphogenic homolog subunit 5 (Arabidopsis)	ci	NA	0.81	0.84	0.94	0.94	-0.13	-0.1	-0.13	-0.1
ci@8:67974259:67974341:-|8:67974340:67974341:-.1	chr8:67974159-67974441	ENSG00000121022	COPS5	COP9 constitutive photomorphogenic homolog subunit 5 (Arabidopsis)	ci	NA	0.19	0.23	0.31	0.27	-0.12	-0.04	-0.08	-0.08
ci@8:68087671:68089915:+|8:68087671:68087672:+.1	chr8:68087571-68090015	ENSG00000104218	CSPP1	centrosome and spindle pole associated protein 1	ci	NA	0.81	0.89	0.78	0.7	0.03	0.19	0.11	0.11
ci@8:8101844:8102107:+|8:8101844:8101845:+.1	chr8:8101744-8102207	ENSG00000254945	FLJ10661	NA	ci	NA	0.34	0.6	0.25	0.37	0.09	0.23	-0.03	0.35
ci@8:86053752:86057624:+|8:86053752:86053753:+.1	chr8:86053652-86057724	ENSG00000133739	LRRCC1	leucine rich repeat and coiled-coil centrosomal protein 1	ci	NA	0.97	0.89	1	1	-0.03	-0.11	-0.03	-0.11
ci@8:95522880:95523413:-|8:95523412:95523413:-.1	chr8:95522780-95523513	ENSG00000164944	KIAA1429	KIAA1429	ci	NA	0.73	0.72	0.88	0.84	-0.15	-0.12	-0.11	-0.16
ci@8:97269342:97270585:-|8:97270584:97270585:-.1	chr8:97269242-97270685	ENSG00000156469	MTERFD1	MTERF domain containing 1	ci	NA	0.88	0.82	0.9	0.93	-0.02	-0.11	-0.05	-0.08
ci@8:97270928:97273729:-|8:97273728:97273729:-.1	chr8:97270828-97273829	ENSG00000156469	MTERFD1	MTERF domain containing 1	ci	NA	0.88	0.92	0.99	0.93	-0.11	-0.01	-0.05	-0.07
ci@8:99207050:99208170:-|8:99208169:99208170:-.1	chr8:99206950-99208270	ENSG00000104361	NIPAL2	NIPA-like domain containing 2	ci	NA	0.73	0.78	0.96	0.91	-0.23	-0.13	-0.18	-0.18
ci@9:100000849:100008378:+|9:100000849:100000850:+.1	chr9:100000749-100008478	ENSG00000197816	C9orf174	chromosome 9 open reading frame 174	ci	NA	0.54	0.57	0.33	0.14	0.21	0.43	0.4	0.24
ci@9:101552888:101558415:-|9:101558414:101558415:-.1	chr9:101552788-101558515	ENSG00000165138	ANKS6	ankyrin repeat and sterile alpha motif domain containing 6	ci	NA	0.72	0.78	0.98	0.89	-0.26	-0.11	-0.17	-0.2
ci@9:123605717:123607271:+|9:123605717:123605718:+.1	chr9:123605617-123607371	ENSG00000226752	RP11-27I1.2	NA	ci	NA	0.03	0.15	0.34	0.32	-0.31	-0.17	-0.29	-0.19
ci@9:123631608:123632123:-|9:123632122:123632123:-.1	chr9:123631508-123632223	ENSG00000119403	PHF19	PHD finger protein 19	ci	NA	0.13	0.14	0.04	0.08	0.09	0.06	0.05	0.1
ci@9:123932094:123933686:+|9:123932094:123932095:+.1	chr9:123931994-123933786	ENSG00000119397	CNTRL	centriolin	ci	NA	0.82	0.83	1	0.91	-0.18	-0.08	-0.09	-0.17
ci@9:125613715:125616231:-|9:125616230:125616231:-.1	chr9:125613615-125616331	ENSG00000056586	RC3H2	ring finger and CCCH-type domains 2	ci	NA	0.85	0.72	0.67	0.73	0.18	-0.01	0.12	0.05
ci@9:127115988:127119043:-|9:127119042:127119043:-.1	chr9:127115888-127119143	ENSG00000136930	PSMB7	proteasome (prosome, macropain) subunit, beta type, 7	ci	NA	0.74	0.71	0.86	0.84	-0.12	-0.13	-0.1	-0.15
ci@9:130425632:130427526:+|9:130425632:130425633:+.1	chr9:130425532-130427626	ENSG00000136854	STXBP1	syntaxin binding protein 1	ci	NA	0.95	0.94	0.82	0.92	0.13	0.02	0.03	0.12
ci@9:130578085:130578222:-|9:130578221:130578222:-.1	chr9:130577985-130578322	ENSG00000106991	ENG	endoglin	ci	NA	0.31	0.39	0.67	0.74	-0.36	-0.35	-0.43	-0.28
ci@9:130578332:130579428:-|9:130579427:130579428:-.1	chr9:130578232-130579528	ENSG00000106991	ENG	endoglin	ci	NA	0.33	0.43	0.63	0.51	-0.3	-0.08	-0.18	-0.2
ci@9:130580656:130580995:-|9:130580994:130580995:-.1	chr9:130580556-130581095	ENSG00000106991	ENG	endoglin	ci	NA	0.52	0.52	0.89	0.78	-0.37	-0.26	-0.26	-0.37
ci@9:130581111:130581901:-|9:130581900:130581901:-.1	chr9:130581011-130582001	ENSG00000106991	ENG	endoglin	ci	NA	0.49	0.43	0.79	0.69	-0.3	-0.26	-0.2	-0.36
ci@9:130581939:130582179:-|9:130582178:130582179:-.1	chr9:130581839-130582279	ENSG00000106991	ENG	endoglin	ci	NA	0.45	0.46	0.69	0.71	-0.24	-0.25	-0.26	-0.23
ci@9:130684393:130687386:-|9:130687385:130687386:-.1	chr9:130684293-130687486	ENSG00000167103	PIP5KL1	phosphatidylinositol-4-phosphate 5-kinase-like 1	ci	NA	0.76	0.81	0.96	0.86	-0.2	-0.05	-0.1	-0.15
ci@9:131038681:131038866:+|9:131038681:131038682:+.1	chr9:131038581-131038966	ENSG00000175854	SWI5	SWI5 recombination repair homolog (yeast)	ci	NA	0.82	0.61	0.82	0.76	0	-0.15	0.06	-0.21
ci@9:131088160:131094432:+|9:131088160:131088161:+.1	chr9:131088060-131094532	ENSG00000167113	COQ4	coenzyme Q4 homolog (S. cerevisiae)	ci	NA	0.86	0.84	0.95	0.85	-0.09	-0.01	0.01	-0.11
ci@9:131583127:131584607:+|9:131583127:131583128:+.1	chr9:131583027-131584707	ENSG00000167136	ENDOG	endonuclease G	ci	NA	0.61	0.53	0.78	0.67	-0.17	-0.14	-0.06	-0.25
ci@9:131588431:131588663:-|9:131588662:131588663:-.1	chr9:131588331-131588763	ENSG00000198917	C9orf114	chromosome 9 open reading frame 114	ci	NA	0.73	0.77	0.84	0.87	-0.11	-0.1	-0.14	-0.07
ci@9:133573014:133573549:+|9:133573014:133573015:+.1	chr9:133572914-133573649	ENSG00000130713	EXOSC2	exosome component 2	ci	NA	0.87	0.94	0.95	0.83	-0.08	0.11	0.04	-0.01
ci@9:135782222:135782688:-|9:135782687:135782688:-.1	chr9:135782122-135782788	ENSG00000165699	TSC1	tuberous sclerosis 1	ci	NA	0.85	0.72	0.8	0.95	0.05	-0.23	-0.1	-0.08
ci@9:135782757:135785958:-|9:135785957:135785958:-.1	chr9:135782657-135786058	ENSG00000165699	TSC1	tuberous sclerosis 1	ci	NA	0.65	0.61	0.33	0.66	0.32	-0.05	-0.01	0.28
ci@9:139243219:139244039:+|9:139243219:139243220:+.1	chr9:139243119-139244139	ENSG00000160360	GPSM1	G-protein signaling modulator 1	ci	NA	0.82	0.9	0.96	0.94	-0.14	-0.04	-0.12	-0.06
ci@9:139327527:139327607:-|9:139327606:139327607:-.1	chr9:139327427-139327707	ENSG00000148384	INPP5E	inositol polyphosphate-5-phosphatase, 72 kDa	ci	NA	0.94	0.83	0.93	1	0.01	-0.17	-0.06	-0.1
ci@9:139846893:139847344:+|9:139846893:139846894:+.1	chr9:139846793-139847444	ENSG00000184925	LCN12	lipocalin 12	ci	NA	0.91	0.7	0.6	1	0.31	-0.3	-0.09	0.1
ci@9:139848416:139848606:+|9:139848416:139848417:+.1	chr9:139848316-139848706	ENSG00000184925	LCN12	lipocalin 12	ci	NA	0.44	0.29	0.13	0.25	0.31	0.04	0.19	0.16
ci@9:139887426:139887505:+|9:139887426:139887427:+.1	chr9:139887326-139887605	ENSG00000148362	C9orf142	chromosome 9 open reading frame 142	ci	NA	0.38	0.36	0.49	0.5	-0.11	-0.14	-0.12	-0.13
ci@9:139902416:139902868:-|9:139902867:139902868:-.1	chr9:139902316-139902968	ENSG00000107331	ABCA2	ATP-binding cassette, sub-family A (ABC1), member 2	ci	NA	0.92	0.73	0.91	0.71	0.01	0.02	0.21	-0.18
ci@9:140070289:140074633:-|9:140074632:140074633:-.1	chr9:140070189-140074733	ENSG00000176248	ANAPC2	anaphase promoting complex subunit 2	ci	NA	0.82	0.83	0.94	0.92	-0.12	-0.09	-0.1	-0.11
ci@9:140079539:140080676:-|9:140080675:140080676:-.1	chr9:140079439-140080776	ENSG00000176248	ANAPC2	anaphase promoting complex subunit 2	ci	NA	0.9	0.83	0.91	0.95	-0.01	-0.12	-0.05	-0.08
ci@9:140107051:140108232:+|9:140107051:140107052:+.1	chr9:140106951-140108332	ENSG00000188566	NDOR1	NADPH dependent diflavin oxidoreductase 1	ci	NA	0.86	0.82	0.95	0.91	-0.09	-0.09	-0.05	-0.13
ci@9:140109973:140110111:+|9:140109973:140109974:+.1	chr9:140109873-140110211	ENSG00000188566	NDOR1	NADPH dependent diflavin oxidoreductase 1	ci	NA	0.84	0.73	0.85	0.91	-0.01	-0.18	-0.07	-0.12
ci@9:140119685:140120066:+|9:140119685:140119686:+.1	chr9:140119585-140120166	ENSG00000197191	C9orf169	chromosome 9 open reading frame 169	ci	NA	0.67	1	0.9	0.87	-0.23	0.13	-0.2	0.1
ci@9:14674383:14680031:-|9:14680030:14680031:-.1	chr9:14674283-14680131	ENSG00000175893	ZDHHC21	zinc finger, DHHC-type containing 21	ci	NA	0.66	0.5	0.8	0.81	-0.14	-0.31	-0.15	-0.3
ci@9:15460311:15461629:+|9:15460311:15460312:+.1	chr9:15460211-15461729	ENSG00000164975	SNAPC3	small nuclear RNA activating complex, polypeptide 3, 50kDa	ci	NA	0.57	0.54	0.7	0.74	-0.13	-0.2	-0.17	-0.16
ci@9:32552477:32552799:+|9:32552477:32552478:+.1	chr9:32552377-32552899	ENSG00000235453	TOPORS-AS1	NA	ci	NA	0.59	0.76	0.93	0.79	-0.34	-0.03	-0.2	-0.17
ci@9:34647564:34647654:+|9:34647564:34647565:+.1	chr9:34647464-34647754	ENSG00000213930	GALT	galactose-1-phosphate uridylyltransferase	ci	NA	0.75	0.73	0.86	0.82	-0.11	-0.09	-0.07	-0.13
ci@9:34649078:34649407:+|9:34649078:34649079:+.1	chr9:34648978-34649507	ENSG00000213930	GALT	galactose-1-phosphate uridylyltransferase	ci	NA	0.8	0.75	0.9	0.88	-0.1	-0.13	-0.08	-0.15
ci@9:34655314:34655602:+|9:34655314:34655315:+.1	chr9:34655214-34655702	ENSG00000137070	IL11RA	interleukin 11 receptor, alpha	ci	NA	0.93	0.68	0.72	0.89	0.21	-0.21	0.04	-0.04
ci@9:34660597:34660851:+|9:34660597:34660598:+.1	chr9:34660497-34660951	ENSG00000137070	IL11RA	interleukin 11 receptor, alpha	ci	NA	0.6	0.39	0.53	0.71	0.07	-0.32	-0.11	-0.14
ci@9:35740359:35740523:-|9:35740522:35740523:-.1	chr9:35740259-35740623	ENSG00000070610	GBA2	glucosidase, beta (bile acid) 2	ci	NA	0.84	0.78	0.71	0.82	0.13	-0.04	0.02	0.07
ci@9:35835215:35841131:+|9:35835215:35835216:+.1	chr9:35835115-35841231	ENSG00000137103	TMEM8B	transmembrane protein 8B	ci	NA	0.67	0.8	0.85	0.93	-0.18	-0.13	-0.26	-0.05
ci@9:4574014:4576001:+|9:4574014:4574015:+.1	chr9:4573914-4576101	ENSG00000106688	SLC1A1	solute carrier family 1 (neuronal/epithelial high affinity glutamate transporter, system Xag), member 1	ci	NA	0.83	0.97	1	0.71	-0.17	0.26	0.12	-0.03
ci@9:46688114:46744177:+|9:46688114:46688115:+.1	chr9:46688014-46744277	ENSG00000227449	RP11-111F5.5	NA	ci	NA	0.75	0.65	0.92	0.84	-0.17	-0.19	-0.09	-0.27
ci@9:5466829:5467840:+|9:5466829:5466830:+.1	chr9:5466729-5467940	ENSG00000120217	CD274	CD274 molecule	ci	NA	0.86	0.71	0.84	0.86	0.02	-0.15	0	-0.13
ci@9:66553803:66554528:+|9:66553803:66553804:+.1	chr9:66553703-66554628	ENSG00000170161	RP11-262H14.4	NA	ci	NA	0.16	0.19	0.3	0.38	-0.14	-0.19	-0.22	-0.11
ci@9:69084959:69106063:+|9:69084959:69084960:+.1	chr9:69084859-69106163	ENSG00000233961	RP11-87H9.2	NA	ci	NA	0.38	0.25	0.67	0.65	-0.29	-0.4	-0.27	-0.42
ci@9:70433052:70434178:-|9:70434177:70434178:-.1	chr9:70432952-70434278	ENSG00000147996	CBWD5	COBW domain containing 5	ci	NA	0.62	0.59	0.96	0.71	-0.34	-0.12	-0.09	-0.37
ci@9:80881619:80885757:+|9:80881619:80881620:+.1	chr9:80881519-80885857	ENSG00000148019	CEP78	centrosomal protein 78kDa	ci	NA	0.38	0.35	0.66	0.46	-0.28	-0.11	-0.08	-0.31
ci@9:97843062:97844857:+|9:97843062:97843063:+.1	chr9:97842962-97844957	ENSG00000148120	C9orf3	chromosome 9 open reading frame 3	ci	NA	0.83	0.83	0.95	0.94	-0.12	-0.11	-0.11	-0.12
ci@9:97876992:97879597:-|9:97879596:97879597:-.1	chr9:97876892-97879697	ENSG00000158169	FANCC	Fanconi anemia, complementation group C	ci	NA	0.98	0.96	0.78	0.89	0.2	0.07	0.09	0.18
ci@9:99077181:99083280:-|9:99083279:99083280:-.1	chr9:99077081-99083380	ENSG00000130958	SLC35D2	solute carrier family 35, member D2	ci	NA	0.09	0.01	0.15	0.13	-0.06	-0.12	-0.04	-0.14
ci@X:10096748:10097996:+|X:10096748:10096749:+.1	chrX:10096648-10098096	ENSG00000047644	WWC3	WWC family member 3	ci	NA	0.97	0.79	1	0.92	-0.03	-0.13	0.05	-0.21
ci@X:11782057:11783586:+|X:11782057:11782058:+.1	chrX:11781957-11783686	ENSG00000005302	MSL3	male-specific lethal 3 homolog (Drosophila)	ci	NA	0.67	0.7	0.83	0.77	-0.16	-0.07	-0.1	-0.13
ci@X:122757134:122757638:-|X:122757637:122757638:-.1	chrX:122757034-122757738	ENSG00000125676	THOC2	THO complex 2	ci	NA	0.83	0.8	0.91	0.93	-0.08	-0.13	-0.1	-0.11
ci@X:129498726:129499515:+|X:129498726:129498727:+.1	chrX:129498626-129499615	ENSG00000102078	SLC25A14	solute carrier family 25 (mitochondrial carrier, brain), member 14	ci	NA	0.6	0.74	0.65	0.81	-0.05	-0.07	-0.21	0.09
ci@X:133559360:133559691:+|X:133559360:133559361:+.1	chrX:133559260-133559791	ENSG00000156531	PHF6	PHD finger protein 6	ci	NA	0.76	0.83	0.9	0.74	-0.14	0.09	0.02	-0.07
ci@X:133678029:133678744:-|X:133678743:133678744:-.1	chrX:133677929-133678844	ENSG00000223749	AC004383.4	NA	ci	NA	0.07	0.02	0.15	0.17	-0.08	-0.15	-0.1	-0.13
ci@X:14038653:14039583:-|X:14039582:14039583:-.1	chrX:14038553-14039683	ENSG00000046647	GEMIN8	gem (nuclear organelle) associated protein 8	ci	NA	0.94	0.89	1	0.99	-0.06	-0.1	-0.05	-0.11
ci@X:153038861:153038973:+|X:153038861:153038862:+.1	chrX:153038761-153039073	ENSG00000198753	PLXNB3	plexin B3	ci	NA	0.88	0.97	0.7	0.92	0.18	0.05	-0.04	0.27
ci@X:153599729:153602874:-|X:153602873:153602874:-.1	chrX:153599629-153602974	ENSG00000196924	FLNA	filamin A, alpha	ci	NA	0.93	0.97	0.77	0.88	0.16	0.09	0.05	0.2
ci@X:154011782:154012303:-|X:154012302:154012303:-.1	chrX:154011682-154012403	ENSG00000130830	MPP1	membrane protein, palmitoylated 1, 55kDa	ci	NA	0.96	0.88	1	0.97	-0.04	-0.09	-0.01	-0.12
ci@X:155252499:155252677:+|X:155252499:155252500:+.1	chrX:155252399-155252777	ENSG00000182484	WASH6P	WAS protein family homolog 6 pseudogene	ci	NA	0.49	0.53	0.69	0.63	-0.2	-0.1	-0.14	-0.16
ci@X:155253125:155253785:+|X:155253125:155253126:+.1	chrX:155253025-155253885	ENSG00000182484	WASH6P	WAS protein family homolog 6 pseudogene	ci	NA	0.86	0.82	0.91	0.97	-0.05	-0.15	-0.11	-0.09
ci@X:155253937:155254697:+|X:155253937:155253938:+.1	chrX:155253837-155254797	ENSG00000182484	WASH6P	WAS protein family homolog 6 pseudogene	ci	NA	0.55	0.55	0.56	0.7	-0.01	-0.15	-0.15	-0.01
ci@X:3735819:3736483:-|X:3736482:3736483:-.1	chrX:3735719-3736583	ENSG00000205664	RP11-706O15.1	HCG1981372, isoform CRA_c; Novel protein; Uncharacterized protein	ci	NA	0.89	0.9	1	0.9	-0.11	0	-0.01	-0.1
ci@X:47420650:47422308:+|X:47420650:47420651:+.1	chrX:47420550-47422408	ENSG00000078061	ARAF	v-raf murine sarcoma 3611 viral oncogene homolog	ci	NA	0.94	0.89	0.95	1	-0.01	-0.11	-0.06	-0.06
ci@X:48341182:48341374:+|X:48341182:48341183:+.1	chrX:48341082-48341474	ENSG00000068438	FTSJ1	FtsJ RNA methyltransferase homolog 1 (E. coli)	ci	NA	0.59	0.56	0.67	0.7	-0.08	-0.14	-0.11	-0.11
ci@X:48565018:48565828:+|X:48565018:48565019:+.1	chrX:48564918-48565928	ENSG00000101945	SUV39H1	suppressor of variegation 3-9 homolog 1 (Drosophila)	ci	NA	0.86	0.79	1	0.97	-0.14	-0.18	-0.11	-0.21
ci@X:48922195:48922567:+|X:48922195:48922196:+.1	chrX:48922095-48922667	ENSG00000147144	CCDC120	coiled-coil domain containing 120	ci	NA	0.68	0.57	0.9	0.82	-0.22	-0.25	-0.14	-0.33
ci@X:48933604:48935496:-|X:48935495:48935496:-.1	chrX:48933504-48935596	ENSG00000250232	PRAF2	NA	ci	NA	0	0.02	0	0.12	0	-0.1	-0.12	0.02
ci@X:48935406:48935496:-|X:48935495:48935496:-.1	chrX:48935306-48935596	ENSG00000196998	WDR45	WD repeat domain 45	ci	NA	0.79	0.81	0.87	0.9	-0.08	-0.09	-0.11	-0.06
ci@X:53456920:53457344:+|X:53456920:53456921:+.1	chrX:53456820-53457444	ENSG00000158423	RIBC1	RIB43A domain with coiled-coils 1	ci	NA	0.94	1	0.65	1	0.29	0	-0.06	0.35
ci@X:53707139:53713215:-|X:53713214:53713215:-.1	chrX:53707039-53713315	ENSG00000086758	HUWE1	HECT, UBA and WWE domain containing 1, E3 ubiquitin protein ligase	ci	NA	0.76	1	0.86	0.75	-0.1	0.25	0.01	0.14
ci@X:54472847:54473744:-|X:54473743:54473744:-.1	chrX:54472747-54473844	ENSG00000102302	FGD1	FYVE, RhoGEF and PH domain containing 1	ci	NA	0.5	0.3	0.54	0.29	-0.04	0.01	0.21	-0.24
ci@X:54472847:54473744:-|X:54473743:54473744:-.1	chrX:54472747-54473844	ENSG00000102302	FGD1	FYVE, RhoGEF and PH domain containing 1	ci	NA	0.5	0.3	0.54	0.29	-0.04	0.01	0.21	-0.24
ci@X:62648861:62652244:-|X:62652243:62652244:-.1	chrX:62648761-62652344	ENSG00000235437	RP11-357C3.3	NA	ci	NA	0.54	0.62	0.8	0.84	-0.26	-0.22	-0.3	-0.18
ci@X:70764485:70767757:+|X:70764485:70764486:+.1	chrX:70764385-70767857	ENSG00000147162	OGT	O-linked N-acetylglucosamine (GlcNAc) transferase	ci	NA	0.25	0.24	0.83	0.83	-0.58	-0.59	-0.58	-0.59
ci@X:71823070:71825121:-|X:71825120:71825121:-.1	chrX:71822970-71825221	ENSG00000067177	PHKA1	phosphorylase kinase, alpha 1 (muscle)	ci	NA	0.94	0.87	0.95	1	-0.01	-0.13	-0.06	-0.08
ci@X:76776976:76777741:-|X:76777740:76777741:-.1	chrX:76776876-76777841	ENSG00000085224	ATRX	alpha thalassemia/mental retardation syndrome X-linked	ci	NA	0.85	0.86	0.93	0.98	-0.08	-0.12	-0.13	-0.07
ci@X:76920267:76931721:-|X:76931720:76931721:-.1	chrX:76920167-76931821	ENSG00000085224	ATRX	alpha thalassemia/mental retardation syndrome X-linked	ci	NA	0.92	0.97	0.8	0.82	0.12	0.15	0.1	0.17
ci@X:9983898:10031485:+|X:9983898:9983899:+.1	chrX:9983798-10031585	ENSG00000047644	WWC3	WWC family member 3	ci	NA	0.94	0.93	0.81	0.54	0.13	0.39	0.4	0.12
ci@Y:14958443:14958858:+|Y:14958443:14958444:+.1	chrY:14958343-14958958	ENSG00000114374	USP9Y	ubiquitin specific peptidase 9, Y-linked	ci	NA	0.81	0.8	0.94	0.95	-0.13	-0.15	-0.14	-0.14
ci@Y:15026894:15026979:+|Y:15026894:15026895:+.1	chrY:15026794-15027079	ENSG00000067048	DDX3Y	DEAD (Asp-Glu-Ala-Asp) box polypeptide 3, Y-linked	ci	NA	0.7	0.75	0.77	0.86	-0.07	-0.11	-0.16	-0.02
ci@Y:21729368:21749096:+|Y:21729368:21729369:+.1	chrY:21729268-21749196	ENSG00000131002	TXLNG2P	NA	ci	NA	0.52	0.56	0.7	0.61	-0.18	-0.05	-0.09	-0.14
ci@Y:21751498:21753666:+|Y:21751498:21751499:+.1	chrY:21751398-21753766	ENSG00000131002	TXLNG2P	NA	ci	NA	0.08	0.03	0.05	0.25	0.03	-0.22	-0.17	-0.02
ci@Y:21753845:21755285:+|Y:21753845:21753846:+.1	chrY:21753745-21755385	ENSG00000131002	TXLNG2P	NA	ci	NA	0.63	0.57	0.86	0.76	-0.23	-0.19	-0.13	-0.29
ci@Y:21759551:21761625:+|Y:21759551:21759552:+.1	chrY:21759451-21761725	ENSG00000131002	TXLNG2P	NA	ci	NA	0.82	0.88	0.94	0.96	-0.12	-0.08	-0.14	-0.06
cj@1:100605267:100605738:+|1:100605267:other:+|1:other:100605738:+.1	chr1:100605167-100605838	ENSG00000122435	TRMT13	tRNA methyltransferase 13 homolog (S. cerevisiae)	cj	NA	0.54	0.51	0.82	0.82	-0.28	-0.31	-0.28	-0.31
cj@1:100606070:100606408:+|1:100606070:other:+|1:other:100606408:+.1	chr1:100605970-100606508	ENSG00000122435	TRMT13	tRNA methyltransferase 13 homolog (S. cerevisiae)	cj	NA	0.51	0.39	0.97	0.93	-0.46	-0.54	-0.42	-0.58
cj@1:110171117:110171265:+|1:110171117:other:+|1:other:110171265:+.1	chr1:110171017-110171365	ENSG00000116337	AMPD2	adenosine monophosphate deaminase 2	cj	NA	0.86	0.96	0.96	0.97	-0.1	-0.01	-0.11	0
cj@1:110171428:110171731:+|1:110171428:other:+|1:other:110171731:+.1	chr1:110171328-110171831	ENSG00000116337	AMPD2	adenosine monophosphate deaminase 2	cj	NA	0.82	0.96	0.94	0.95	-0.12	0.01	-0.13	0.02
cj@1:115130573:115137094:-|1:other:115137094:-|1:115130573:other:-.1	chr1:115130473-115137194	ENSG00000175984	DENND2C	DENN/MADD domain containing 2C	cj	NA	0.97	0.96	0.96	0.7	0.01	0.26	0.27	0
cj@1:118455305:118461219:-|1:other:118461219:-|1:118455305:other:-.1	chr1:118455205-118461319	ENSG00000196505	GDAP2	ganglioside induced differentiation associated protein 2	cj	NA	0.88	0.95	0.97	1	-0.09	-0.05	-0.12	-0.02
cj@1:1238355:1238542:-|1:other:1238542:-|1:1238355:other:-.1	chr1:1238255-1238642	ENSG00000131584	ACAP3	ArfGAP with coiled-coil, ankyrin repeat and PH domains 3	cj	NA	0.29	0.31	0.43	0.51	-0.14	-0.2	-0.22	-0.12
cj@1:1238661:1239466:-|1:other:1239466:-|1:1238661:other:-.1	chr1:1238561-1239566	ENSG00000131584	ACAP3	ArfGAP with coiled-coil, ankyrin repeat and PH domains 3	cj	NA	0.99	1	0.96	0.83	0.03	0.17	0.16	0.04
cj@1:12520451:12557554:+|1:12520451:other:+|1:other:12557554:+.1	chr1:12520351-12557654	ENSG00000048707	VPS13D	vacuolar protein sorting 13 homolog D (S. cerevisiae)	cj	NA	0.71	0.88	0.93	0.75	-0.22	0.13	-0.04	-0.05
cj@1:1412730:1414024:+|1:1412730:other:+|1:other:1414024:+.1	chr1:1412630-1414124	ENSG00000160072	ATAD3B	ATPase family, AAA domain containing 3B	cj	NA	0.64	0.58	0.36	0.5	0.28	0.08	0.14	0.22
cj@1:142816004:142888739:-|1:other:142888739:-|1:142816004:other:-.1	chr1:142815904-142888839	ENSG00000234978	RP11-423O2.5	NA	cj	NA	0.96	0.73	1	0.86	-0.04	-0.13	0.1	-0.27
cj@1:143426080:143465380:-|1:other:143465380:-|1:143426080:other:-.1	chr1:143425980-143465480	ENSG00000185044	BX004987.4	NA	cj	NA	0.54	0.68	0.27	0.34	0.27	0.34	0.2	0.41
cj@1:144053668:144094362:+|1:144053668:other:+|1:other:144094362:+.1	chr1:144053568-144094462	ENSG00000196369	SRGAP2B	NA	cj	NA	0.4	0.4	0.7	0.39	-0.3	0.01	0.01	-0.3
cj@1:144220179:144220787:+|1:144220179:other:+|1:other:144220787:+.1	chr1:144220079-144220887	ENSG00000168614	NBPF9	neuroblastoma breakpoint family, member 9	cj	NA	0.56	0.83	0.88	0.91	-0.32	-0.08	-0.35	-0.05
cj@1:144300755:144301190:-|1:other:144301190:-|1:144300755:other:-.1	chr1:144300655-144301290	ENSG00000235398	LINC00623	NA	cj	NA	0.44	0.5	0.75	0.5	-0.31	0	-0.06	-0.25
cj@1:144821973:144823128:+|1:144821973:other:+|1:other:144823128:+.1	chr1:144821873-144823228	ENSG00000225241	NBPF8P	NA	cj	NA	0.67	0.44	0.34	0.21	0.33	0.23	0.46	0.1
cj@1:144827928:144828541:+|1:144827928:other:+|1:other:144828541:+.1	chr1:144827828-144828641	ENSG00000168614	NBPF9	neuroblastoma breakpoint family, member 9	cj	NA	0.45	0.07	0.39	0.32	0.06	-0.25	0.13	-0.32
cj@1:145299939:145301720:+|1:145299939:other:+|1:other:145301720:+.1	chr1:145299839-145301820	ENSG00000255168	RP11-458D21.5	Uncharacterized protein	cj	NA	0.33	0.49	0.18	0.43	0.15	0.06	-0.1	0.31
cj@1:145354467:145355187:+|1:145354467:other:+|1:other:145355187:+.1	chr1:145354367-145355287	ENSG00000163386	NBPF10	neuroblastoma breakpoint family, member 10	cj	NA	0.9	0.76	0.65	0.64	0.25	0.12	0.26	0.11
cj@1:148007972:148010113:-|1:other:148010113:-|1:148007972:other:-.1	chr1:148007872-148010213	ENSG00000203836	NBPF24	neuroblastoma breakpoint family, member 24	cj	NA	0.38	0.41	0.57	0.4	-0.19	0.01	-0.02	-0.16
cj@1:148008624:148009344:-|1:other:148009344:-|1:148008624:other:-.1	chr1:148008524-148009444	ENSG00000122497	NBPF14	neuroblastoma breakpoint family, member 14	cj	NA	0.61	0.57	0.99	0.6	-0.38	-0.03	0.01	-0.42
cj@1:148010164:148010884:-|1:other:148010884:-|1:148010164:other:-.1	chr1:148010064-148010984	ENSG00000203836	NBPF24	neuroblastoma breakpoint family, member 24	cj	NA	0.88	0.87	1	0.89	-0.12	-0.02	-0.01	-0.13
cj@1:150476911:150477108:+|1:150476911:other:+|1:other:150477108:+.1	chr1:150476811-150477208	ENSG00000143374	TARS2	threonyl-tRNA synthetase 2, mitochondrial (putative)	cj	NA	0.9	0.93	0.81	0.83	0.09	0.1	0.07	0.12
cj@1:150477209:150477382:+|1:150477209:other:+|1:other:150477382:+.1	chr1:150477109-150477482	ENSG00000143374	TARS2	threonyl-tRNA synthetase 2, mitochondrial (putative)	cj	NA	0.88	0.93	0.75	0.81	0.13	0.12	0.07	0.18
cj@1:151867670:151881836:-|1:other:151881836:-|1:151867670:other:-.1	chr1:151867570-151881936	ENSG00000159445	THEM4	thioesterase superfamily member 4	cj	NA	0.62	0.64	0.83	0.86	-0.21	-0.22	-0.24	-0.19
cj@1:153751029:153751163:+|1:153751029:other:+|1:other:153751163:+.1	chr1:153750929-153751263	ENSG00000143554	SLC27A3	solute carrier family 27 (fatty acid transporter), member 3	cj	NA	0.93	1	0.82	1	0.11	0	-0.07	0.18
cj@1:153915101:153915354:-|1:other:153915354:-|1:153915101:other:-.1	chr1:153915001-153915454	ENSG00000198837	DENND4B	DENN/MADD domain containing 4B	cj	NA	0.87	0.81	0.81	0.95	0.06	-0.14	-0.08	0
cj@1:154982873:154983392:+|1:154982873:other:+|1:other:154983392:+.1	chr1:154982773-154983492	ENSG00000160685	ZBTB7B	zinc finger and BTB domain containing 7B	cj	NA	0.52	0.44	0.48	0.26	0.04	0.18	0.26	-0.04
cj@1:156514015:156514181:-|1:other:156514181:-|1:156514015:other:-.1	chr1:156513915-156514281	ENSG00000183856	IQGAP3	IQ motif containing GTPase activating protein 3	cj	NA	0.92	0.85	0.98	0.97	-0.06	-0.12	-0.05	-0.13
cj@1:156521887:156524027:-|1:other:156524027:-|1:156521887:other:-.1	chr1:156521787-156524127	ENSG00000183856	IQGAP3	IQ motif containing GTPase activating protein 3	cj	NA	0.65	0.79	0.78	0.78	-0.13	0.01	-0.13	0.01
cj@1:156524184:156526325:-|1:other:156526325:-|1:156524184:other:-.1	chr1:156524084-156526425	ENSG00000183856	IQGAP3	IQ motif containing GTPase activating protein 3	cj	NA	0.59	0.78	0.73	0.77	-0.14	0.01	-0.18	0.05
cj@1:16046415:16047824:+|1:16046415:other:+|1:other:16047824:+.1	chr1:16046315-16047924	ENSG00000116786	PLEKHM2	pleckstrin homology domain containing, family M (with RUN domain) member 2	cj	NA	0.42	0.41	0.63	0.61	-0.21	-0.2	-0.19	-0.22
cj@1:16047883:16051812:+|1:16047883:other:+|1:other:16051812:+.1	chr1:16047783-16051912	ENSG00000116786	PLEKHM2	pleckstrin homology domain containing, family M (with RUN domain) member 2	cj	NA	0.44	0.39	0.62	0.61	-0.18	-0.22	-0.17	-0.23
cj@1:16085343:16090991:+|1:16085343:other:+|1:other:16090991:+.1	chr1:16085243-16091091	ENSG00000162458	FBLIM1	filamin binding LIM protein 1	cj	NA	0.57	0.29	0.63	0.42	-0.06	-0.13	0.15	-0.34
cj@1:161719935:161721458:+|1:161719935:other:+|1:other:161721458:+.1	chr1:161719835-161721558	ENSG00000081721	DUSP12	dual specificity phosphatase 12	cj	NA	0.48	0.52	0.58	0.7	-0.1	-0.18	-0.22	-0.06
cj@1:1653150:1654147:-|1:other:1654147:-|1:1653150:other:-.1	chr1:1653050-1654247	ENSG00000008128	CDK11A	cyclin-dependent kinase 11A	cj	NA	0.83	0.82	0.71	0.83	0.12	-0.01	0	0.11
cj@1:16894525:16895568:-|1:other:16895568:-|1:16894525:other:-.1	chr1:16894425-16895668	ENSG00000219481	NBPF1	NA	cj	NA	0.99	0.76	0.96	0.91	0.03	-0.15	0.08	-0.2
cj@1:16945598:16946340:-|1:other:16946340:-|1:16945598:other:-.1	chr1:16945498-16946440	ENSG00000215908	CROCCP2	NA	cj	NA	0.72	0.58	0.61	0.89	0.11	-0.31	-0.17	-0.03
cj@1:169847960:169857817:-|1:other:169857817:-|1:169847960:other:-.1	chr1:169847860-169857917	ENSG00000000457	SCYL3	SCY1-like 3 (S. cerevisiae)	cj	NA	0.84	0.85	1	1	-0.16	-0.15	-0.16	-0.15
cj@1:172363550:172366304:-|1:other:172366304:-|1:172363550:other:-.1	chr1:172363450-172366404	ENSG00000135845	PIGC	phosphatidylinositol glycan anchor biosynthesis, class C	cj	NA	0.41	0	0.13	0.43	0.28	-0.43	-0.02	-0.13
cj@1:17297262:17297960:+|1:17297262:other:+|1:other:17297960:+.1	chr1:17297162-17298060	ENSG00000058453	CROCC	ciliary rootlet coiled-coil, rootletin	cj	NA	0.85	0.72	0.61	0.8	0.24	-0.08	0.05	0.11
cj@1:176085817:176104146:-|1:other:176104146:-|1:176085817:other:-.1	chr1:176085717-176104246	ENSG00000143207	RFWD2	ring finger and WD repeat domain 2, E3 ubiquitin protein ligase	cj	NA	0.88	0.83	0.97	0.93	-0.09	-0.1	-0.05	-0.14
cj@1:183534914:183536055:-|1:other:183536055:-|1:183534914:other:-.1	chr1:183534814-183536155	ENSG00000116701	NCF2	neutrophil cytosolic factor 2	cj	NA	0.67	0.88	0.9	0.9	-0.23	-0.02	-0.23	-0.02
cj@1:183536123:183536339:-|1:other:183536339:-|1:183536123:other:-.1	chr1:183536023-183536439	ENSG00000116701	NCF2	neutrophil cytosolic factor 2	cj	NA	0.79	0.96	0.95	1	-0.16	-0.04	-0.21	0.01
cj@1:200618354:200619553:-|1:other:200619553:-|1:200618354:other:-.1	chr1:200618254-200619653	ENSG00000118197	DDX59	DEAD (Asp-Glu-Ala-Asp) box polypeptide 59	cj	NA	0.66	0.83	0.82	0.83	-0.16	0	-0.17	0.01
cj@1:200619804:200628155:-|1:other:200628155:-|1:200619804:other:-.1	chr1:200619704-200628255	ENSG00000118197	DDX59	DEAD (Asp-Glu-Ala-Asp) box polypeptide 59	cj	NA	0.62	0.74	0.82	0.84	-0.2	-0.1	-0.22	-0.08
cj@1:201755705:201757596:+|1:201755705:other:+|1:other:201757596:+.1	chr1:201755605-201757696	ENSG00000134369	NAV1	neuron navigator 1	cj	NA	1	0.95	0.98	0.83	0.02	0.12	0.17	-0.03
cj@1:201757766:201758868:+|1:201757766:other:+|1:other:201758868:+.1	chr1:201757666-201758968	ENSG00000134369	NAV1	neuron navigator 1	cj	NA	1	0.95	0.97	0.85	0.03	0.1	0.15	-0.02
cj@1:201798500:201816407:+|1:201798500:other:+|1:other:201816407:+.1	chr1:201798400-201816507	ENSG00000198700	IPO9	importin 9	cj	NA	0.72	0.67	0.69	0.79	0.03	-0.12	-0.07	-0.02
cj@1:202398057:202399859:+|1:202398057:other:+|1:other:202399859:+.1	chr1:202397957-202399959	ENSG00000077157	PPP1R12B	protein phosphatase 1, regulatory subunit 12B	cj	NA	0.98	0.94	0.67	0.77	0.31	0.17	0.21	0.27
cj@1:202399938:202400608:+|1:202399938:other:+|1:other:202400608:+.1	chr1:202399838-202400708	ENSG00000077157	PPP1R12B	protein phosphatase 1, regulatory subunit 12B	cj	NA	0.98	0.94	0.58	0.85	0.4	0.09	0.13	0.36
cj@1:202462445:202464421:+|1:202462445:other:+|1:other:202464421:+.1	chr1:202462345-202464521	ENSG00000077157	PPP1R12B	protein phosphatase 1, regulatory subunit 12B	cj	NA	0.99	0.98	0.86	0.96	0.13	0.02	0.03	0.12
cj@1:204191907:204192590:-|1:other:204192590:-|1:204191907:other:-.1	chr1:204191807-204192690	ENSG00000143850	PLEKHA6	pleckstrin homology domain containing, family A member 6	cj	NA	0.75	0.88	0.95	0.8	-0.2	0.08	-0.05	-0.07
cj@1:204192713:204197211:-|1:other:204197211:-|1:204192713:other:-.1	chr1:204192613-204197311	ENSG00000143850	PLEKHA6	pleckstrin homology domain containing, family A member 6	cj	NA	0.78	0.89	0.93	0.79	-0.15	0.1	-0.01	-0.04
cj@1:211444651:211447552:+|1:211444651:other:+|1:other:211447552:+.1	chr1:211444551-211447652	ENSG00000117625	RCOR3	REST corepressor 3	cj	NA	0.8	0.91	0.92	0.88	-0.12	0.03	-0.08	-0.01
cj@1:212142049:212148508:-|1:other:212148508:-|1:212142049:other:-.1	chr1:212141949-212148608	ENSG00000143493	INTS7	integrator complex subunit 7	cj	NA	0.82	0.92	0.93	0.9	-0.11	0.02	-0.08	-0.01
cj@1:213037211:213046020:+|1:213037211:other:+|1:other:213046020:+.1	chr1:213037111-213046120	ENSG00000162769	FLVCR1	feline leukemia virus subgroup C cellular receptor 1	cj	NA	0.85	0.88	0.56	0.59	0.29	0.29	0.26	0.32
cj@1:223803847:223806995:-|1:other:223806995:-|1:223803847:other:-.1	chr1:223803747-223807095	ENSG00000203697	CAPN8	calpain 8	cj	NA	0.73	0.76	0.6	0.74	0.13	0.02	-0.01	0.16
cj@1:226250512:226252030:+|1:226250512:other:+|1:other:226252030:+.1	chr1:226250412-226252130	ENSG00000163041	H3F3A	H3 histone, family 3A	cj	NA	0.95	0.9	0.88	0.67	0.07	0.23	0.28	0.02
cj@1:229779440:229781606:+|1:229779440:other:+|1:other:229781606:+.1	chr1:229779340-229781706	ENSG00000135763	URB2	URB2 ribosome biogenesis 2 homolog (S. cerevisiae)	cj	NA	0.95	0.97	0.97	0.82	-0.02	0.15	0.13	0
cj@1:229781716:229783257:+|1:229781716:other:+|1:other:229783257:+.1	chr1:229781616-229783357	ENSG00000135763	URB2	URB2 ribosome biogenesis 2 homolog (S. cerevisiae)	cj	NA	0.96	0.98	0.96	0.86	0	0.12	0.1	0.02
cj@1:231069607:231075132:-|1:other:231075132:-|1:231069607:other:-.1	chr1:231069507-231075232	ENSG00000143643	TTC13	tetratricopeptide repeat domain 13	cj	NA	0.25	0.28	0.54	0.54	-0.29	-0.26	-0.29	-0.26
cj@1:233193036:233225807:-|1:other:233225807:-|1:233193036:other:-.1	chr1:233192936-233225907	ENSG00000135749	PCNXL2	pecanex-like 2 (Drosophila)	cj	NA	0.72	0.65	0.3	0.63	0.42	0.02	0.09	0.35
cj@1:233334776:233335900:-|1:other:233335900:-|1:233334776:other:-.1	chr1:233334676-233336000	ENSG00000135749	PCNXL2	pecanex-like 2 (Drosophila)	cj	NA	0.97	0.97	0.85	0.82	0.12	0.15	0.15	0.12
cj@1:234561539:234563063:-|1:other:234563063:-|1:234561539:other:-.1	chr1:234561439-234563163	ENSG00000059588	TARBP1	TAR (HIV-1) RNA binding protein 1	cj	NA	1	0.97	0.82	0.94	0.18	0.03	0.06	0.15
cj@1:234563134:234563322:-|1:other:234563322:-|1:234563134:other:-.1	chr1:234563034-234563422	ENSG00000059588	TARBP1	TAR (HIV-1) RNA binding protein 1	cj	NA	1	0.97	0.85	0.94	0.15	0.03	0.06	0.12
cj@1:234596142:234599583:-|1:other:234599583:-|1:234596142:other:-.1	chr1:234596042-234599683	ENSG00000059588	TARBP1	TAR (HIV-1) RNA binding protein 1	cj	NA	0.78	0.79	0.94	0.81	-0.16	-0.02	-0.03	-0.15
cj@1:234599680:234601402:-|1:other:234601402:-|1:234599680:other:-.1	chr1:234599580-234601502	ENSG00000059588	TARBP1	TAR (HIV-1) RNA binding protein 1	cj	NA	0.69	0.5	0.89	0.67	-0.2	-0.17	0.02	-0.39
cj@1:235622094:235628953:-|1:other:235628953:-|1:235622094:other:-.1	chr1:235621994-235629053	ENSG00000162885	B3GALNT2	beta-1,3-N-acetylgalactosaminyltransferase 2	cj	NA	0.81	0.85	0.94	0.86	-0.13	-0.01	-0.05	-0.09
cj@1:236341936:236343179:+|1:236341936:other:+|1:other:236343179:+.1	chr1:236341836-236343279	ENSG00000077585	GPR137B	G protein-coupled receptor 137B	cj	NA	0.95	0.95	0.82	0.92	0.13	0.03	0.03	0.13
cj@1:23693661:23694466:-|1:other:23694466:-|1:23693661:other:-.1	chr1:23693561-23694566	ENSG00000125945	ZNF436	zinc finger protein 436	cj	NA	0.75	0.78	0.97	0.75	-0.22	0.03	0	-0.19
cj@1:243222970:243223721:-|1:other:243223721:-|1:243222970:other:-.1	chr1:243222870-243223821	ENSG00000214837	RP11-261C10.3	NA	cj	NA	0.21	0.22	0.17	0.36	0.04	-0.14	-0.15	0.05
cj@1:244852644:244855181:+|1:244852644:other:+|1:other:244855181:+.1	chr1:244852544-244855281	ENSG00000121644	DESI2	desumoylating isopeptidase 2	cj	NA	0.86	0.91	0.78	0.83	0.08	0.08	0.03	0.13
cj@1:247492917:247493268:-|1:other:247493268:-|1:247492917:other:-.1	chr1:247492817-247493368	ENSG00000162714	ZNF496	zinc finger protein 496	cj	NA	0.75	0.76	0.87	0.88	-0.12	-0.12	-0.13	-0.11
cj@1:24790610:24795476:+|1:24790610:other:+|1:other:24795476:+.1	chr1:24790510-24795576	ENSG00000001461	NIPAL3	NIPA-like domain containing 3	cj	NA	0.76	0.64	0.5	0.61	0.26	0.03	0.15	0.14
cj@1:249144980:249148136:-|1:other:249148136:-|1:249144980:other:-.1	chr1:249144880-249148236	ENSG00000171163	ZNF692	zinc finger protein 692	cj	NA	0.9	0.84	0.95	0.92	-0.05	-0.08	-0.02	-0.11
cj@1:28290204:28293014:+|1:28290204:other:+|1:other:28293014:+.1	chr1:28290104-28293114	ENSG00000158156	XKR8	XK, Kell blood group complex subunit-related family, member 8	cj	NA	0.77	0.65	0.94	0.8	-0.17	-0.15	-0.03	-0.29
cj@1:32051477:32052311:+|1:32051477:other:+|1:other:32052311:+.1	chr1:32051377-32052411	ENSG00000142910	TINAGL1	tubulointerstitial nephritis antigen-like 1	cj	NA	0.75	0.88	0.85	0.71	-0.1	0.17	0.04	0.03
cj@1:32560572:32566043:+|1:32560572:other:+|1:other:32566043:+.1	chr1:32560472-32566143	ENSG00000121775	TMEM39B	transmembrane protein 39B	cj	NA	0.91	0.92	0.89	0.8	0.02	0.12	0.11	0.03
cj@1:32680817:32681274:-|1:other:32681274:-|1:32680817:other:-.1	chr1:32680717-32681374	ENSG00000160055	TMEM234	transmembrane protein 234	cj	NA	0.6	0.42	0.68	0.73	-0.08	-0.31	-0.13	-0.26
cj@1:32682118:32682490:-|1:other:32682490:-|1:32682118:other:-.1	chr1:32682018-32682590	ENSG00000160055	TMEM234	transmembrane protein 234	cj	NA	0.75	0.94	0.91	0.72	-0.16	0.22	0.03	0.03
cj@1:3548902:3549962:-|1:other:3549962:-|1:3548902:other:-.1	chr1:3548802-3550062	ENSG00000116213	WRAP73	WD repeat containing, antisense to TP73	cj	NA	0.87	0.92	0.96	0.98	-0.09	-0.06	-0.11	-0.04
cj@1:3656951:3659368:-|1:other:3659368:-|1:3656951:other:-.1	chr1:3656851-3659468	ENSG00000227372	TP73-AS1	NA	cj	NA	0.79	0.76	0.89	0.79	-0.1	-0.03	0	-0.13
cj@1:39854330:39888046:+|1:39854330:other:+|1:other:39888046:+.1	chr1:39854230-39888146	ENSG00000127603	MACF1	microtubule-actin crosslinking factor 1	cj	NA	0.65	0.74	0.42	0.53	0.23	0.21	0.12	0.32
cj@1:43831294:43833586:-|1:other:43833586:-|1:43831294:other:-.1	chr1:43831194-43833686	ENSG00000066322	ELOVL1	ELOVL fatty acid elongase 1	cj	NA	0.72	0.71	0.43	0.62	0.29	0.09	0.1	0.28
cj@1:43918675:43919084:-|1:other:43919084:-|1:43918675:other:-.1	chr1:43918575-43919184	ENSG00000178922	HYI	hydroxypyruvate isomerase (putative)	cj	NA	0.51	0.33	0.44	0.18	0.07	0.15	0.33	-0.11
cj@1:44458059:44458195:+|1:44458059:other:+|1:other:44458195:+.1	chr1:44457959-44458295	ENSG00000159214	CCDC24	coiled-coil domain containing 24	cj	NA	0.64	0.85	0.75	0.66	-0.11	0.19	-0.02	0.1
cj@1:45795109:45796188:-|1:other:45796188:-|1:45795109:other:-.1	chr1:45795009-45796288	ENSG00000132781	MUTYH	mutY homolog (E. coli)	cj	NA	0.83	0.6	0.83	0.87	0	-0.27	-0.04	-0.23
cj@1:46151292:46152084:-|1:other:46152084:-|1:46151292:other:-.1	chr1:46151192-46152184	ENSG00000159592	GPBP1L1	GC-rich promoter binding protein 1-like 1	cj	NA	0.7	0.68	0.57	0.7	0.13	-0.02	0	0.11
cj@1:47717594:47725961:-|1:other:47725961:-|1:47717594:other:-.1	chr1:47717494-47726061	ENSG00000123473	STIL	SCL/TAL1 interrupting locus	cj	NA	0.75	0.74	0.84	0.93	-0.09	-0.19	-0.18	-0.1
cj@1:53370505:53370706:-|1:other:53370706:-|1:53370505:other:-.1	chr1:53370405-53370806	ENSG00000121310	ECHDC2	enoyl CoA hydratase domain containing 2	cj	NA	0.84	0.83	0.8	0.72	0.04	0.11	0.12	0.03
cj@1:61849037:61869776:+|1:61849037:other:+|1:other:61869776:+.1	chr1:61848937-61869876	ENSG00000162599	NFIA	nuclear factor I/A	cj	NA	0.88	0.85	1	0.98	-0.12	-0.13	-0.1	-0.15
cj@1:62149218:62160369:-|1:other:62160369:-|1:62149218:other:-.1	chr1:62149118-62160469	ENSG00000162604	TM2D1	TM2 domain containing 1	cj	NA	0.7	0.75	0.83	0.69	-0.13	0.06	0.01	-0.08
cj@1:6641359:6642118:+|1:6641359:other:+|1:other:6642118:+.1	chr1:6641259-6642218	ENSG00000204859	ZBTB48	zinc finger and BTB domain containing 48	cj	NA	0.96	0.82	0.99	0.96	-0.03	-0.14	0	-0.17
cj@1:70728530:70736539:-|1:other:70736539:-|1:70728530:other:-.1	chr1:70728430-70736639	ENSG00000118454	ANKRD13C	ankyrin repeat domain 13C	cj	NA	0.83	0.89	0.76	0.8	0.07	0.09	0.03	0.13
cj@1:70736639:70740403:-|1:other:70740403:-|1:70736639:other:-.1	chr1:70736539-70740503	ENSG00000118454	ANKRD13C	ankyrin repeat domain 13C	cj	NA	0.88	0.85	0.76	0.8	0.12	0.05	0.08	0.09
cj@1:78105287:78107069:-|1:other:78107069:-|1:78105287:other:-.1	chr1:78105187-78107169	ENSG00000036549	ZZZ3	zinc finger, ZZ-type containing 3	cj	NA	0.94	0.92	0.87	0.83	0.07	0.09	0.11	0.05
cj@1:78107131:78107207:-|1:other:78107207:-|1:78107131:other:-.1	chr1:78107031-78107307	ENSG00000036549	ZZZ3	zinc finger, ZZ-type containing 3	cj	NA	0.92	0.87	0.87	0.78	0.05	0.09	0.14	0
cj@1:79125168:79126239:+|1:79125168:other:+|1:other:79126239:+.1	chr1:79125068-79126339	ENSG00000137965	IFI44	interferon-induced protein 44	cj	NA	0.68	0.68	0.69	0.79	-0.01	-0.11	-0.11	-0.01
[truncated: 2,341 more rows]
