# Supplementary material for: Wild-Type U2AF1 Antagonizes the Splicing Program Characteristic of U2AF1-Mutant Tumors and Is Required for Cell Survival
Source: PLOS journal article supplement (doi:10.1371/journal.pgen.1006384), 2016-10-24

**A**

**Alternative Splicing Events with  
Increased Psi by *U2AF1S34F***

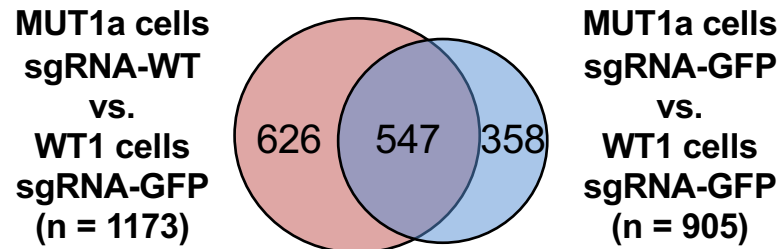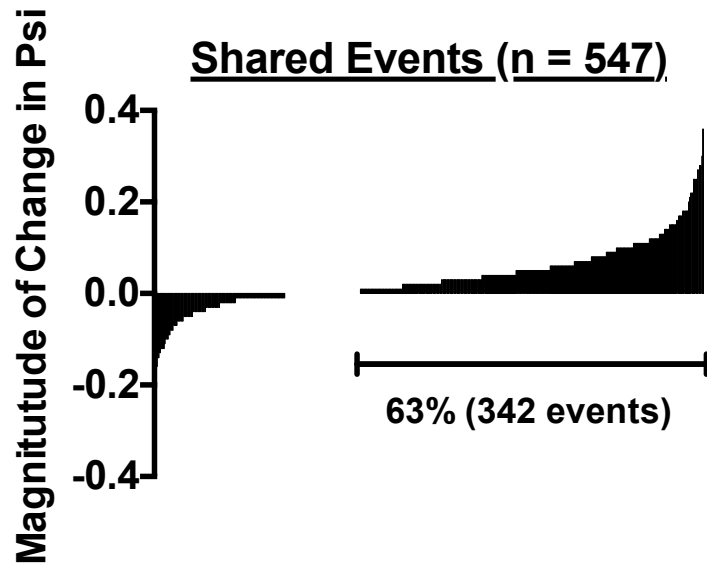**B**

**Alternative Splicing Events with  
Decreased Psi by *U2AF1S34F***

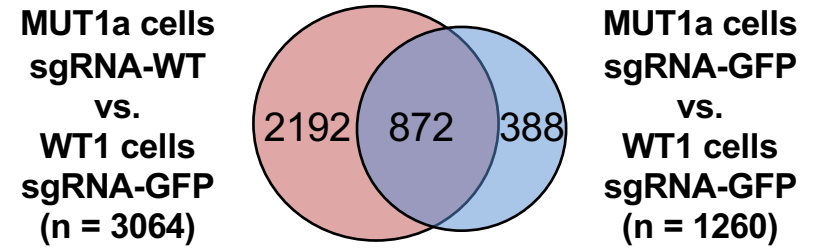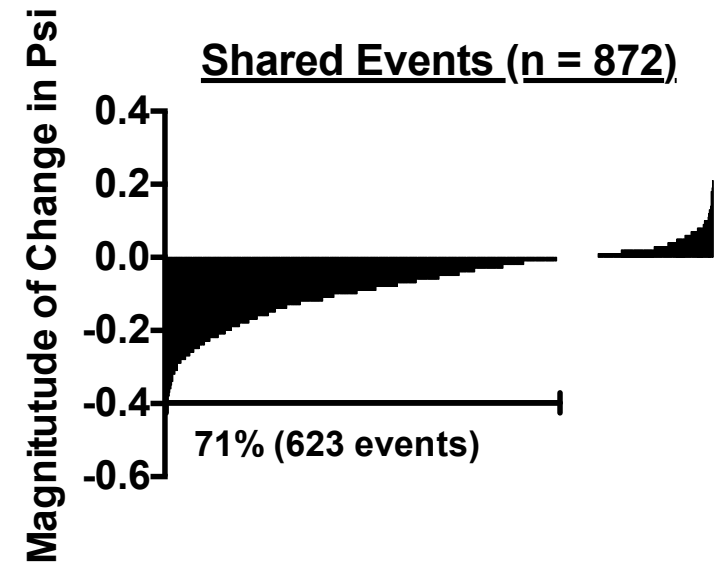

Supplement: S11 (10.1371/journal.pgen.1006384.s011) [file journal.pgen.1006384.s011]
